# Supplementary material for: Catalytic asymmetric defluorinative allylation of silyl enol ethers
Source: Royal Society of Chemistry journal article supplement (doi:10.1039/d3sc01498c), 2023-01-01
Supplement: d3sc01498c1.pdf [file d3sc01498c1.pdf]

## Supporting Information

# Catalytic Asymmetric Defluorinative Allylation of Silyl Enol Ethers

Jordi Duran, Javier Mateos, Albert Moyano and Xavier Companyó\*

*Section of Organic Chemistry – Department of Inorganic and Organic Chemistry  
University of Barcelona  
carrer Martí i Franquès 1, 08028 Barcelona, Spain*

*E-mail: [x.companyo@ub.edu](mailto:x.companyo@ub.edu)*

## Table of Contents

|                                                                                                                                                 |           |
|-------------------------------------------------------------------------------------------------------------------------------------------------|-----------|
| <b>A. General Information .....</b>                                                                                                             | <b>4</b>  |
| <b>B. Synthesis of Starting Materials .....</b>                                                                                                 | <b>5</b>  |
| <i>B.1. General Procedure A – Synthesis of Morita-Baylis-Hillman alcohols.....</i>                                                              | <i>5</i>  |
| <i>B.2. General Procedure B – Synthesis of allyl fluorides.....</i>                                                                             | <i>9</i>  |
| <i>B.3. General Procedure C – Synthesis of TBS-, TES-, and TIPS-protected silyl enol ethers .</i>                                               | <i>14</i> |
| <i>B.4. General Procedure D – Synthesis of TMS-protected silyl enol ethers .....</i>                                                            | <i>19</i> |
| <i>B.5. Synthesis of TBS-protected silyl enol ethers from natural products.....</i>                                                             | <i>20</i> |
| <i>B.6. Synthesis of tert-butyl dimethyl((2-methylcyclohex-1-en-1-yl)oxy)silane.....</i>                                                        | <i>22</i> |
| <i>B.7. Synthesis of Starting Materials for the control experiments.....</i>                                                                    | <i>23</i> |
| <b>C. Defluorinative Allylation of Silyl Enol Ethers – Racemic reaction .....</b>                                                               | <b>25</b> |
| <b>D. Optimization of the Asymmetric Reaction .....</b>                                                                                         | <b>26</b> |
| <i>D.1. Optimization – Catalyst screening .....</i>                                                                                             | <i>26</i> |
| <i>D.2. Optimization – Solvent screening.....</i>                                                                                               | <i>28</i> |
| <i>D.3. Optimization – Substituent at the silyl group screening.....</i>                                                                        | <i>29</i> |
| <i>D.4. Optimization – Temperature, concentration, catalyst loading and time screening .....</i>                                                | <i>29</i> |
| <b>E. Asymmetric Defluorinative Allylation of Silyl Enol Ethers – General procedure .....</b>                                                   | <b>30</b> |
| <i>E.1. Generality of the asymmetric transformation.....</i>                                                                                    | <i>30</i> |
| <i>E.2. Limitations of the catalytic transformation.....</i>                                                                                    | <i>45</i> |
| <b>F. Characterization of the catalytic species.....</b>                                                                                        | <b>53</b> |
| <i>F.1. Generation of the catalytic species with DABCO – Using 1 equiv. of DABCO and allyl carbonates.....</i>                                  | <i>53</i> |
| <i>F.2. Generation of the catalytic species with DABCO – Using 20 mol% of DABCO and allyl carbonates.....</i>                                   | <i>54</i> |
| <i>F.3. Generation of the catalytic species with DABCO – Using 1 equiv. of DABCO and allyl fluorides.....</i>                                   | <i>55</i> |
| <i>F.4. Generation of the catalytic species with DABCO – Using 20 mol% of DABCO and allyl fluorides.....</i>                                    | <i>59</i> |
| <i>F.5. Generation of the catalytic species with (DHQD)<sub>2</sub>PHAL – Using 20 mol% of (DHQD)<sub>2</sub>PHAL and allyl carbonates.....</i> | <i>61</i> |
| <i>F.6. Generation of the catalytic species with (DHQD)<sub>2</sub>PHAL – Using 20 mol% of (DHQD)<sub>2</sub>PHAL and allyl fluorides .....</i> | <i>62</i> |
| <b>G. Control experiments .....</b>                                                                                                             | <b>64</b> |
| <i>G.1. Control experiments – Utilization of different leaving groups in the allylic position with cyclic ketones and DABCO .....</i>           | <i>65</i> |

|                                                                                                                                                   |            |
|---------------------------------------------------------------------------------------------------------------------------------------------------|------------|
| G.2. Control experiments – Utilization of different leaving groups in the allylic position with cyclic ketones and (DHQD) <sub>2</sub> PHAL ..... | 68         |
| G.3. Control experiments – Utilization of different enol derivatives with allyl fluorides and DABCO .....                                         | 70         |
| G.4. Control experiments – Utilization of enol carbonates with allyl fluorides and DABCO .....                                                    | 72         |
| G.5. Control experiments – Activation of silyl enol ethers with external fluoride sources.....                                                    | 73         |
| G.6. Control experiments – Utilization of Li-salts as competitive fluorophilic traps .....                                                        | 78         |
| G.7. Control experiments – Reactivity of (DHQD) <sub>2</sub> PHAL with cyclic silyl enol ethers .....                                             | 80         |
| <b>H. Determination of the Si-F interaction .....</b>                                                                                             | <b>81</b>  |
| H.1. Determination of Si-F interaction – Electrochemical studies .....                                                                            | 81         |
| H.2. Determination of Si-F interaction – <sup>19</sup> F NMR Titration.....                                                                       | 83         |
| H.3. Detailed discussion of the proposed structure for hypervalent intermediate B .....                                                           | 88         |
| <b>I. Kinetic profiles.....</b>                                                                                                                   | <b>89</b>  |
| I.1. Kinetic profiles – Synthesis of the enantiopure (R)-2b .....                                                                                 | 89         |
| I.2. Kinetic profiles – Synthesis of the enantiopure (S)-2b.....                                                                                  | 90         |
| I.3. Kinetic profiles.....                                                                                                                        | 91         |
| I.4. Racemization of the allyl fluoride .....                                                                                                     | 93         |
| I.5. Identification of the catalyst resting state .....                                                                                           | 94         |
| <b>J. Mechanistic consideration .....</b>                                                                                                         | <b>96</b>  |
| <b>K. Derivatizations.....</b>                                                                                                                    | <b>98</b>  |
| K.1. Hydrogenation – Reduction of the terminal alkene .....                                                                                       | 98         |
| K.2.Reduction and cyclization.....                                                                                                                | 104        |
| <b>L. References.....</b>                                                                                                                         | <b>110</b> |
| <b>M. Determination of the absolute configuration. X-Ray Crystallographic Data of compound 3w .....</b>                                           | <b>112</b> |
| <b>N. NMR Spectra .....</b>                                                                                                                       | <b>121</b> |
| N.1. NMR spectra of allyl fluorides.....                                                                                                          | 121        |
| N.2. NMR spectra of silyl enol ethers.....                                                                                                        | 131        |
| N.3. NMR spectra of enol carbonate.....                                                                                                           | 133        |
| N.4. NMR spectra of products 3a-ae and 4a.....                                                                                                    | 134        |
| N.5. NMR spectra of derivatization products.....                                                                                                  | 175        |
| <b>O. Chiral HPLC Chromatograms .....</b>                                                                                                         | <b>179</b> |

## A. General Information

**NMR experiments:** NMR spectra ( $^1\text{H}$ ,  $^{13}\text{C}$  and  $^{19}\text{F}$ ) were recorded on a Bruker Avance III HD 400 (400 MHz) spectrometer equipped with a CryoProbe<sup>TM</sup> Prodigy or a Bruker Avance Neo 500 (500 MHz) equipped with a broadband *i*Prob. The chemical shifts ( $\delta$ ) for  $^1\text{H}$  and  $^{13}\text{C}$  are given in ppm relative to residual signals of the solvents ( $\text{CHCl}_3$ , 7.26 ppm,  $^1\text{H}$  NMR, 77.16 ppm  $^{13}\text{C}$  NMR). Coupling constants are given in Hz. The following abbreviations are used to indicate the multiplicity: s, singlet; d, doublet; t, triplet; q, quartet; m, multiplet; bs, broad signal. NMR yields were calculated by using 1,3,5-trimethoxybenzene or mesitylene as internal standards.

**High-Resolution Mass Spectra (HRMS):** were obtained with an Agilent LC/MSD-TOC 2006 instrument.

**Chiral High-Performance Liquid Chromatography (HPLC):** analyses were performed on a Shimadzu LC-20AD instrument with DGU-20A5 and a SPD-20A UV/VIS detector using Phenomenex Lux<sup>®</sup> 5  $\mu\text{m}$  Cellulose-1, Cellulose-2, Cellulose-5 or Amylose-2 LC Columns 254 x 4.6 mm in *n*-hexane/2-propanol mixtures.

**Chiral Gas Chromatography (GC):** analyses were performed on a Shimadzu GC-2010 instrument using an Agilent CP-Chirasil Dex CB GC Column 25 m x 0.32 mm x 0.25  $\mu\text{m}$  – 20 to 200/225 C.

**Gas Chromatography (GC):** analyses were performed on a Shimadzu GC-2010 Pro instrument using an Agilent DB-5 GC column 30 m x 0.250 mm x 0.25  $\mu\text{m}$  – 60 to 325/350 C.

**Chromatographic purification** of products was accomplished by flash chromatography in Sigma Aldrich silica gel 60 N (spherical, particle size 63–210  $\mu\text{m}$ ). Thin-layer chromatography (TLC) was carried out with Silicycle TLC plates with silica gel 60 F254. Visualization of the developed chromatography was performed by checking UV absorbance (254nm) as well as with aqueous ceric ammonium molybdate and potassium permanganate solutions. Organic solutions were concentrated under reduced pressure on Büchi rotary evaporators.

**Electrochemical characterizations:** were carried out in acetonitrile (MeCN)/0.1 M tetrabutylammonium perchlorate/lithium perchlorate ( $\text{TBAClO}_4/\text{LiClO}_4$ ) at room temperature, on a BASi Epsilon EClipse<sup>TM</sup> instrument (Metrohm, The Netherlands) in a glass cell. A typical three-electrode cell was employed, which was composed of glassy carbon (GC) working electrode (3 mm diameter), a platinum wire as counter electrode and a Ag/AgCl as reference electrode (RE). Oxygen was removed by purging the solution with high-purity Nitrogen. The potential of ferrocenium/ferrocene ( $\text{Fc}/\text{Fc}^+$ ) couple was measured and found to be 0.49 V vs Ag/AgCl, in agreement with the value reported in literature in MeCN.<sup>1</sup> The GC electrode was polished before any measurement with diamond paste and ultrasonically rinsed with deionized water for 15 minutes. The electrode was electrochemically activated in the background solution by means of several voltammetric cycles at 100 mV/s between the anodic and cathodic solvent/electrolyte discharges.

**Materials:** Commercial grade reagents and solvents were purchased at the highest commercial quality from Sigma Aldrich, Apollo Scientific, TCI and Fluorochem and used as received, unless otherwise stated.

## B. Synthesis of Starting Materials

### B.1. General Procedure A – Synthesis of Morita-Baylis-Hillman alcohols

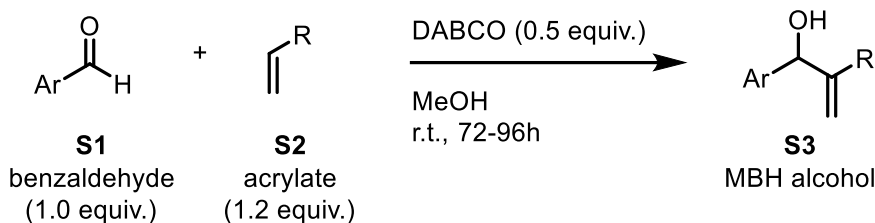

The reaction was carried out following the previously described procedure<sup>2</sup>

To a round bottom flask containing MeOH (0.75 equiv., 37.5 mmol) benzaldehyde **S1** (1.0 equiv., 50 mmol) and the corresponding acrylate **S2** (1.2 equiv., 60 mmol) were added at room temperature. Then, DABCO **5a** (0.5 equiv., 25 mmol) was added, and the solution was stirred for 72-96 h until full consumption of the aldehyde starting material was observed by TLC analysis. The crude reaction mixture was purified by column chromatography using a mixture of hexane/ethyl acetate as eluent, obtaining **S3** derivatives as oils/solids.

#### methyl 2-(hydroxy(phenyl)methyl)acrylate (**S3b**)

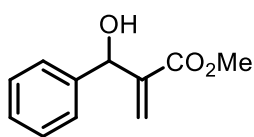

85% yield. Spectroscopic data match with those previously reported.<sup>3a</sup>

<sup>1</sup>H NMR (400 MHz, CDCl<sub>3</sub>) δ 7.33-7.29 (5H, m), 6.33 (1H, s), 5.84 (1H, s), 5.56 (1H, d, *J* = 5.5 Hz), 3.71 (3H, s), 3.14 (1H, d, *J* = 5.5 Hz) ppm.

#### methyl 2-((4-fluorophenyl)(hydroxy)methyl)acrylate (**S3c**)

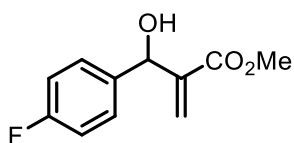

88% yield. Spectroscopic data match with those previously reported..<sup>3b</sup>

<sup>1</sup>H NMR (400 MHz, CDCl<sub>3</sub>) δ 7.30-7.36 (2H, m), 6.98-7.05 (2H, m), 6.32 (1H, s), 5.80 (1H, s), 5.53 (1H, s), 3.71 (3H, s), 2.57 (1H, bs) ppm.

#### methyl 2-(hydroxy(4-(trifluoromethyl)phenyl)methyl)acrylate (**S3d**)

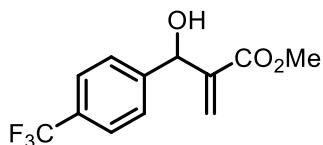

80% yield. Spectroscopic data match with those previously reported.<sup>3c</sup>

<sup>1</sup>H NMR (400 MHz, CDCl<sub>3</sub>) δ 7.60 (2H, m), 7.50 (2H, m), 6.37 (1H, s), 5.84 (1H, s), 5.60 (1H, d, *J* = 5.9 Hz), 3.74 (3H, s), 3.25 (1H, d, *J* = 5.2 Hz) ppm.

**methyl 2-((4-cyanophenyl)(hydroxy)methyl)acrylate (S3e)**

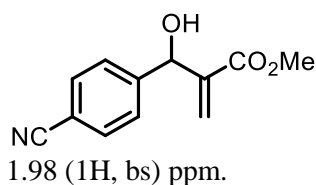

78% yield. Spectroscopic data match with those previously reported.<sup>3c</sup>

<sup>1</sup>H NMR (400 MHz, CDCl<sub>3</sub>) δ 7.46 (2H, d, *J* = 7.8 Hz), 7.33 (2H, d, *J* = 7.8 Hz), 6.20 (1H, s), 5.69 (1H, s), 5.41 (1H, bs), 3.55 (3H, s),

**methyl 4-(1-hydroxy-2-(methoxycarbonyl)allyl)benzoate (S3f)**

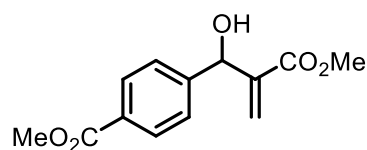

85% yield. Spectroscopic data match with those previously reported.<sup>3b</sup>

<sup>1</sup>H NMR (400 MHz, CDCl<sub>3</sub>) δ 8.04 (2H, d, *J* = 8.5 Hz), 7.46 (2H, d, *J* = 8.5 Hz), 6.35 (1H, s), 5.84 (1H, s), 5.60 (1H, s), 3.89 (3H, s), 3.75 (3H, s), 3.70 (1H, bs) ppm.

**methyl 2-((4-chlorophenyl)(hydroxy)methyl)acrylate (S3g)**

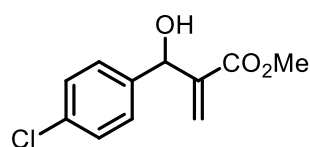

93% yield. Spectroscopic data match with those previously reported.<sup>3b</sup>

<sup>1</sup>H NMR (400 MHz, CDCl<sub>3</sub>) δ 7.33 (2H, d, *J* = 7.6 Hz), 7.20 (2H, d, *J* = 7.6 Hz), 6.32 (1H, s), 5.80 (1H, s), 5.49 (1H, s), 3.74 (3H, s), 2.59 (1H, bs) ppm.

**methyl 2-(hydroxy(4-methoxyphenyl)methyl)acrylate (S3h)**

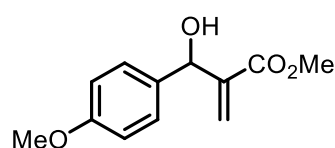

71% yield. Spectroscopic data match with those previously reported.<sup>3a</sup>

<sup>1</sup>H NMR (400 MHz, CDCl<sub>3</sub>) δ 7.28 (2H, *J* = 8.6 Hz d), 6.87 (2H, *J* = 8.7 Hz, d), 6.32 (1H, s), 5.85 (1H, s), 5.52 (1H, d, *J* = 4.8 Hz), 3.71 (3H, s), 2.93 (1H, bs) ppm.

**methyl 2-(hydroxy(p-tolyl)methyl)acrylate (S3i)**

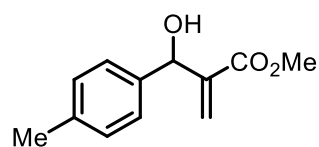

91% yield. Spectroscopic data match with those previously reported.<sup>3b</sup>

<sup>1</sup>H NMR (400 MHz, CDCl<sub>3</sub>) δ 7.28 (2H, d, *J* = 8.8 Hz), 6.70 (2H, d, *J* = 8.8 Hz), 6.34 (1H, s), 6.30 (1H, s), 5.10 (1H, s), 3.78 (3H, s), 3.74 (3H, s), 2.85 (1H, bs) ppm.

**methyl 2-((4-bromophenyl)(hydroxy)methyl)acrylate (S3j)**

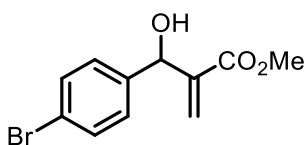

75% yield. Spectroscopic data match with those previously reported.<sup>3a</sup>

<sup>1</sup>H NMR (400 MHz, CDCl<sub>3</sub>) δ 7.46 (2H, *J* = 8.4 Hz d), 7.24 (2H, *J* = 8.4 Hz, d), 6.33 (1H, s), 5.83 (1H, s), 5.49 (1H, d, *J* = 5.6 Hz), 3.71 (3H, s), 3.22 (1H, d, *J* = 5.7 Hz) ppm.

**methyl 2-(hydroxy(m-tolyl)methyl)acrylate (S3k)**

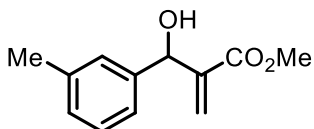

86% yield. Spectroscopic data match with those previously reported.<sup>3d</sup>

<sup>1</sup>H NMR (400 MHz, CDCl<sub>3</sub>) δ 7.25-7.06 (4H, m), 6.36 (1H, s), 5.84 (1H, s), 5.54 (1H, s), 3.73 (3H, s), 2.35 (3H, s) ppm.

**methyl 2-(hydroxy(o-tolyl)methyl)acrylate (S3l)**

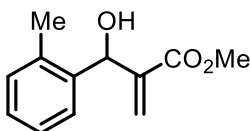

69% yield. Spectroscopic data match with those previously reported.<sup>3d</sup>

<sup>1</sup>H NMR (400 MHz, CDCl<sub>3</sub>) δ 7.47-7.39 (1H, m), 7.26-7.12 (3H, m), 6.33 (1H, s), 5.81 (1H, s), 5.60 (1H, t, *J* = 1.2 Hz), 3.77 (3H, s), 2.33 (3H, s) ppm.

**methyl 2-(hydroxy(naphthalen-2-yl)methyl)acrylate (S3m)**

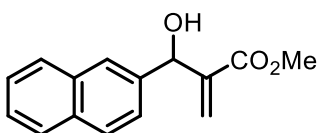

88% yield. Spectroscopic data match with those previously reported.<sup>3b</sup>

<sup>1</sup>H NMR (400 MHz, CDCl<sub>3</sub>) δ 7.9-7.3 (7H, m), 6.36 (1H, s), 6.31 (1H, s), 5.19 (1H, s), 3.75 (3H, s), 2.58 (1H, bs) ppm.

**methyl 2-(hydroxy(naphthalen-1-yl)methyl)acrylate (S3n)**

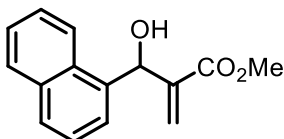

*J* = 4.6 Hz) ppm.

74% yield. Spectroscopic data match with those previously reported.<sup>3e</sup>

<sup>1</sup>H NMR (400 MHz, CDCl<sub>3</sub>) δ 8.02-8.05 (1H, m), 7.89-7.91 (1H, m), 7.85 (1H, d, *J* = 8.3 Hz), 7.67 (1H, d, *J* = 7.1 Hz), 7.52 (3H, m), 6.42 (1H, d, *J* = 4.0 Hz) 6.39 (1H, s) 5.6 (1H, s), 3.82 (3H, s), 3.08 (1H, d,

**methyl 2-(hydroxy(pyridin-2-yl)methyl)acrylate (S3o)**

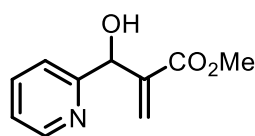

(3H, s) ppm.

50% yield. Spectroscopic data match with those previously reported.<sup>3f</sup>

<sup>1</sup>H NMR (400 MHz, CDCl<sub>3</sub>) δ 8.55 (1H, dt, *J* = 4.8, 1.7 Hz), 7.68 (1H, td, *J* = 7.7, 1.7 Hz), 7.43 (1H, dq, *J* = 7.9, 1.0 Hz), 7.22 (1H, ddd, *J* = 7.5, 4.9, 1.3 Hz), 6.37 (1H, s), 5.98 (1H, s), 5.64 (1H, s), 4.89 (1H, s), 3.74

**ethyl 2-(hydroxy(phenyl)methyl)acrylate (S3p)**

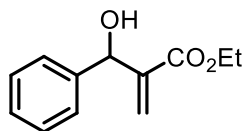

83% yield. Spectroscopic data match with those previously reported.<sup>3a</sup>

<sup>1</sup>H NMR (400 MHz, CDCl<sub>3</sub>) δ 7.38-7.26 (5H, m), 6.32 (1H, s), 5.83 (1H, s), 5.53 (1H, d, *J* = 5.2 Hz), 4.14 (2H, q, *J* = 7.1 Hz), 3.34 (1H, d, *J* = 5.3 Hz), 1.22 (3H, t, *J* = 7.1 Hz) ppm.

**hexyl 2-(hydroxy(phenyl)methyl)acrylate (S3q)**

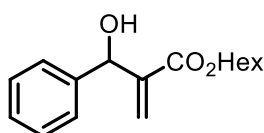

78% yield. Spectroscopic data match with those previously reported.<sup>3g</sup>

<sup>1</sup>H NMR (400 MHz, CDCl<sub>3</sub>) δ 7.41-7.26 (5H, m), 6.34 (1H, s), 5.82 (1H, t, *J* = 1.25 Hz), 5.56 (1H, bs), 4.11 (2H, td, *J* = 6.7, 1.2 Hz), 3.04 (1H, bs), 1.67-1.54 (2H, m), 1.34-1.20 (6H, m), 0.94-0.81 (3H, m) ppm.

**tert-butyl 2-(hydroxy(phenyl)methyl)acrylate (S3r)**

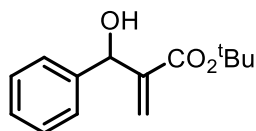

72% yield. Spectroscopic data match with those previously reported.<sup>3c</sup>

<sup>1</sup>H NMR (400 MHz, CDCl<sub>3</sub>) δ 7.06-7.16 (5H, m), 6.05 (1H, s), 5.58 (1H, s), 5.28 (1H, bs), 3.30 (1H, bs), 1.19 (9H, s) ppm.

**methyl 2-(cyclohexyl(hydroxy)methyl)acrylate (S3s)**

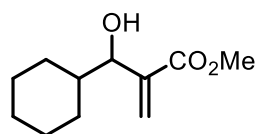

50% yield. Spectroscopic data match with those previously reported.<sup>3c</sup>

<sup>1</sup>H NMR (400 MHz, CDCl<sub>3</sub>) δ 6.25 (1H, d, *J* = 1.2 Hz), 5.72 (1H, d, *J* = 0.8 Hz), 4.06 (1H, d, *J* = 5.9 Hz), 3.78 (3H, s), 2.52 (1H, s), 1.97 (1H, d, *J* = 12.8 Hz), 1.82-1.42 (5H, m), 1.3-1.07 (3H, m), 1.06-0.83 (2H, m).

**methyl 3-hydroxy-2-methylene-4-phenylbutanoate (S3t)**

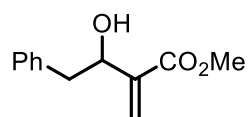

17% yield. Spectroscopic data match with those previously reported.<sup>3h</sup>

<sup>1</sup>H NMR (400 MHz, CDCl<sub>3</sub>) δ 7.21 (5H, m), 6.22 (1H, s), 5.76 (1H, t, *J* = 1.2 Hz), 4.64 (1H, m), 3.77 (3H, s), 2.89 (2H, m), 2.48 (1H, d, *J* = 6.0 Hz).

## B.2. General Procedure B – Synthesis of allyl fluorides

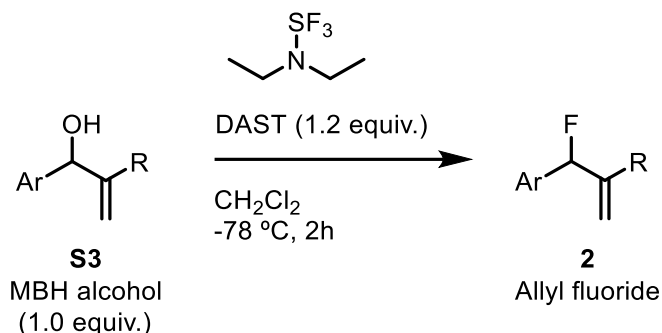

The reaction was carried out following the previously described procedure.<sup>4</sup>

Into a two-necked round-bottom flask equipped with a magnetic stirring bar the corresponding MBH alcohol **S3** (1.0 equiv., 15 mmol) was dissolved in dry  $\text{CH}_2\text{Cl}_2$  (0.33 M) at  $-78\text{ }^\circ\text{C}$  under nitrogen atmosphere. To this solution, DAST (1.2 equiv., 18 mmol) was added dropwise. The reaction mixture was stirred for 2 h at  $-78\text{ }^\circ\text{C}$  and then quenched with a saturated  $\text{NaHCO}_3$  aqueous solution. The aqueous layer was extracted with  $\text{CH}_2\text{Cl}_2$  (3x50 mL). The combined organic layers were dried over  $\text{MgSO}_4$  and concentrated under reduced pressure. The crude product **2** was purified by column chromatography using a mixture of hexane and  $\text{CH}_2\text{Cl}_2$  obtaining **2** derivatives as oils.

### methyl 2-(fluoro(phenyl)methyl)acrylate (**2b**)

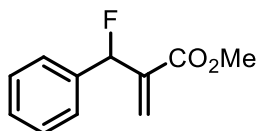

44% yield. Spectroscopic data match with those previously reported.<sup>4</sup>

**<sup>1</sup>H NMR** (400 MHz,  $\text{CDCl}_3$ )  $\delta$  7.41-7.34 (m, 5H), 6.45 (s, 1H), 6.29 (d,  $J_{\text{H-F}} = 45.9\text{ Hz}$ , 1H), 6.02 (s, 1H), 3.72 (s, 3H) ppm.

### methyl 2-((4-fluorophenyl)(hydroxy)methyl)acrylate (**2c**)

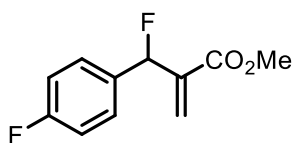

**2c** was prepared following the abovementioned procedure.

**S3c** (1.00 g, 1.0 equiv., 4.8 mmol) was dissolved in 30 mL of  $\text{CH}_2\text{Cl}_2$  and the solution was cooled to  $-78\text{ }^\circ\text{C}$ . Then, DAST (0.92 g, 1.2 equiv., 5.7 mmol) was added dropwise. After 2h, the reaction was quenched and purified. **2c** was obtained in 52% yield (534 mg, 2.5 mmol) as a transparent oil.

**<sup>1</sup>H NMR** (400 MHz,  $\text{CDCl}_3$ )  $\delta$  7.41-7.34 (2H, m), 7.10-7.02 (2H, m), 6.46 (1H, dt,  $J = 3.05, 0.99\text{ Hz}$ ), 6.25 (1H, d,  $J = 45.84\text{ Hz}$ ), 6.04 (1H, dd,  $J = 1.56, 0.90\text{ Hz}$ ), 3.72 (3H, s) ppm. **<sup>13</sup>C NMR** (126 MHz,  $\text{CDCl}_3$ )  $\delta$  165.2 (d,  $J_{\text{C-F}} = 6.8\text{ Hz}$ ), 163.2 (dd,  $J_{\text{C-F}} = 245, 3.0\text{ Hz}$ ), 139.2 (d,  $J_{\text{C-F}} = 23.1\text{ Hz}$ ), 135.5 (dd,  $J_{\text{C-F}} = 17.9, 3.1\text{ Hz}$ ), 129.3 (dd,  $J_{\text{C-F}} = 8.5, 5.5\text{ Hz}$ ), 125.9 (d,  $J_{\text{C-F}} = 23.1\text{ Hz}$ ), 115.7 (dd,  $J_{\text{C-F}} = 22, 1.31\text{ Hz}$ ), 90.3 (d,  $J_{\text{C-F}} = 174.2\text{ Hz}$ ), 52.2 ppm. **<sup>19</sup>F NMR** (471 MHz,  $\text{CDCl}_3$ )  $\delta$  -112.55, -169.73 ppm. **HRMS (ESI)** Calculated for  $\text{C}_{11}\text{H}_{11}\text{F}_2\text{O}_2^+$  ( $[\text{M}+\text{H}]^+$ ) 212.1958. Found 212.1956.

**methyl 2-(fluoro(p-tolyl)methyl)acrylate (2d)**

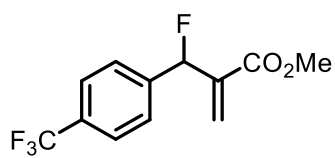

48% yield. Spectroscopic data match with those previously reported.<sup>4</sup>

<sup>1</sup>H NMR (400 MHz, CDCl<sub>3</sub>) δ 7.64 (d, *J* = 7.9 Hz, 2H), 7.52 (d, *J* = 7.9 Hz, 2H), 6.49 (s, 1H), 6.33 (d, *J*<sub>H-F</sub> = 45.9 Hz, 1H), 6.06 (s, 1H), 3.74 (s, 3H) ppm.

**methyl 2-((4-cyanophenyl)fluoromethyl)acrylate (2e)**

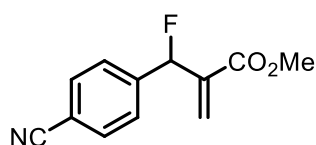

30% yield. Spectroscopic data match with those previously reported.<sup>5a</sup>

<sup>1</sup>H NMR (400 MHz, CDCl<sub>3</sub>) δ 7.70 (d, *J* = 8.0 Hz, 2H), 7.54 (d, *J* = 8.0 Hz, 2H), 6.52 (d, *J* = 2.8 Hz, 1H), 6.33 (d, *J*<sub>H-F</sub> = 45.6 Hz, 1H), 6.09 (s, 1H), 3.76 (s, 3H) ppm.

**methyl 4-(1-fluoro-2-(methoxycarbonyl)allyl)benzoate (2f)**

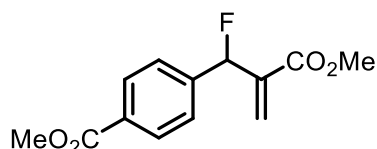

40% yield. Spectroscopic data match with those previously reported.<sup>5a</sup>

<sup>1</sup>H NMR (400 MHz, CDCl<sub>3</sub>) δ 8.07 (d, *J* = 8.1 Hz, 2H), 7.49 (d, *J* = 7.6 Hz, 2H), 6.50 (d, *J* = 2.3 Hz, 1H), 6.35 (d, *J*<sub>H-F</sub> = 45.8 Hz, 1H), 6.05 (s, 1H), 3.94 (s, 3H), 3.75 (s, 3H) ppm.

**methyl 2-((4-chlorophenyl)fluoromethyl)acrylate (2g)**

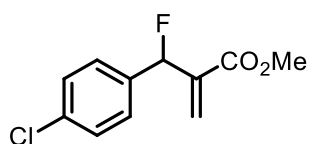

32% yield. Spectroscopic data match with those previously reported.<sup>4</sup>

<sup>1</sup>H NMR (400 MHz, CDCl<sub>3</sub>) δ 7.51 (d, *J* = 7.9 Hz, 2H), 7.27 (dd, *J* = 7.6, 1.8 Hz, 2H), 6.46 (d, *J* = 2.9 Hz, 1H), 6.23 (d, *J*<sub>H-F</sub> = 45.9 Hz, 1H), 6.04 (s, 1H), 3.72 (s, 3H) ppm.

**methyl 2-(fluoro(4-methoxyphenyl)methyl)acrylate (2h)**

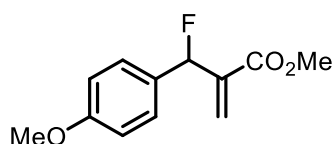

10% yield. Spectroscopic data match with those previously reported.<sup>5a</sup>

<sup>1</sup>H NMR (400 MHz, CDCl<sub>3</sub>) δ 7.34 (d, *J* = 8.6, 2H), 6.92 (d, *J* = 8.3 Hz, 2H), 6.46 (d, *J* = 3.0 Hz, 1H), 6.25 (d, *J*<sub>H-F</sub> = 46.2 Hz, 1H), 6.06 (s, 1H), 3.83 (s, 3H), 3.73 (s, 3H) ppm.

**methyl 2-(fluoro(p-tolyl)methyl)acrylate (2i)**

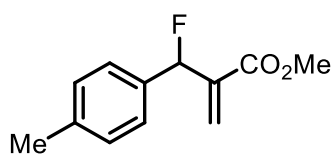

36% yield. Spectroscopic data match with those previously reported.<sup>4</sup>

<sup>1</sup>H NMR (400 MHz, CDCl<sub>3</sub>) δ 7.28 (d, *J* = 9.1 Hz, 2H), 7.18 (d, *J* = 7.6 Hz, 2H), 6.45-6.44 (m, 1H), 6.25 (d, *J*<sub>H-F</sub> = 46.2 Hz, 1H), 6.03 (d, *J* = 1.0 Hz, 1H), 3.71 (s, 3H), 2.36 (s, 3H) ppm.

**methyl 2-((4-bromophenyl)(fluoro)methyl)acrylate (2j)**

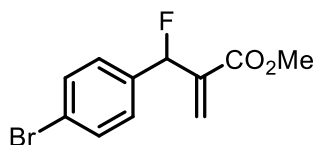

43% yield. Spectroscopic data match with those previously reported.<sup>4</sup>

<sup>1</sup>H NMR (400 MHz, CDCl<sub>3</sub>) δ 7.51 (d, *J* = 7.9 Hz, 2H), 7.27 (dd, *J* = 7.6, 1.8 Hz, 2H), 6.46 (d, *J* = 2.9 Hz, 1H), 6.23 (d, *J*<sub>H-F</sub> = 45.9 Hz, 1H), 6.04 (s, 1H), 3.72 (s, 3H) ppm.

**methyl 2-(fluoro(m-tolyl)methyl)acrylate (2k)**

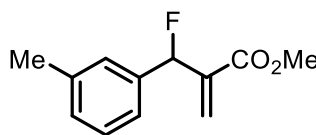

39% yield. Spectroscopic data match with those previously reported.<sup>4</sup>

<sup>1</sup>H NMR (400 MHz, CDCl<sub>3</sub>) δ 7.28-7.17 (m, 4H), 6.45 (s, 1H), 6.25 (d, *J*<sub>H-F</sub> = 45.9 Hz, 1H), 6.02 (s, 1H), 3.72 (s, 3H), 2.36 (s, 3H) ppm.

**methyl 2-(fluoro(o-tolyl)methyl)acrylate (2l)**

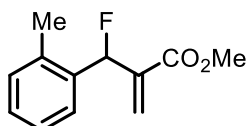

40% yield. Spectroscopic data match with those previously reported.<sup>4</sup>

<sup>1</sup>H NMR (400 MHz, CDCl<sub>3</sub>): δ 7.33 (d, *J* = 7.9 Hz, 1H), 7.29-7.18 (m, 3H), 6.55 (d, *J*<sub>H-F</sub> = 45.9 Hz, 1H), 6.49 (s, 1H), 5.88 (d, *J* = 0.9 Hz, 1H), 3.75 (s, 3H), 2.40 (s, 3H) ppm.

**methyl 2-(fluoro(naphthalen-2-yl)methyl)acrylate (2m)**

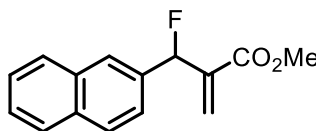

26% yield. Spectroscopic data match with those previously reported.<sup>4</sup>

<sup>1</sup>H NMR (400 MHz, CDCl<sub>3</sub>) δ 7.88-7.85 (m, 4H), 7.53-7.48 (m, 3H), 6.47 (d, *J*<sub>H-F</sub> = 45.9 Hz, 1H), 6.51 (d, *J* = 2.4 Hz, 1H), 6.10 (s, 1H), 3.72 (s, 3H) ppm.

### methyl 2-(fluoro(naphthalen-1-yl)methyl)acrylate (**2n**)

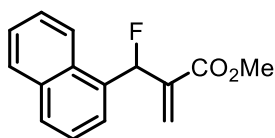

**2n** was prepared following the abovementioned procedure.

**S3n** (2.00 g, 1.0 equiv., 8.2 mmol) was dissolved in 25 mL of CH<sub>2</sub>Cl<sub>2</sub> and the solution was cooled down to -78 °C. Then, DAST (1.59 g, 1.2 equiv., 9.8 mmol) was added dropwise. After 2h, the reaction was quenched and purified. **2n** was obtained in 35% yield (701 mg, 2.9 mmol) as a white solid.

**<sup>1</sup>H NMR** (500 MHz, CDCl<sub>3</sub>) δ 8.01 (1H, d, *J* = 8.19 Hz), 7.88 (2H, t, *J* = 7.8 Hz), 7.59-7.45 (4H, m), (1H, d, *J*<sub>H-F</sub> = 45.7 Hz), 6.54 (1H, s), 5.88 (1H, s), 3.77 (3H, s) ppm. **<sup>13</sup>C NMR** (126 MHz, CDCl<sub>3</sub>) δ 165.8 (d, *J*<sub>C-F</sub> = 4.6 Hz), 139.0 (d, *J*<sub>C-F</sub> = 21.4 Hz), 138.9, 133.0 (d, *J*<sub>C-F</sub> = 19.0 Hz), 129.8 (d, *J*<sub>C-F</sub> = 2.6 Hz), 128.9, 128.6 (d, *J*<sub>C-F</sub> = 7.8 Hz), 129.8 (d, *J* = 2.6 Hz), 126.8, 126.1, 125.3, 125.1 (d, *J*<sub>C-F</sub> = 8.6 Hz), 123.6, 87.9 (d, *J*<sub>C-F</sub> = 172.3 Hz), 52.3 ppm. **<sup>19</sup>F NMR** (471 MHz, CDCl<sub>3</sub>) δ -171.93 (1F, d, *J*<sub>H-F</sub> = 45.7 Hz) ppm. **HRMS (ESI)** Calculated for C<sub>15</sub>H<sub>13</sub>FN<sub>2</sub>O<sub>2</sub><sup>+</sup> ([M+Na]<sup>+</sup>) 267.0792. Found 267.08.

### methyl 2-(fluoro(pyridin-2-yl)methyl)acrylate (**2o**)

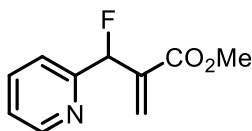

**2o** was prepared following the abovementioned procedure.

**S3o** (1.00 g, 1.0 equiv., 5.1 mmol) was dissolved in 16 mL of CH<sub>2</sub>Cl<sub>2</sub> and the solution was cooled down to -78 °C. Then, DAST (0.99 g, 1.2 equiv., 6.1 mmol) was added dropwise. After 2h, the reaction was quenched and purified. **2o** was obtained in 26% yield (259 mg, 1.3 mmol) as a purple viscous oil.

**<sup>1</sup>H NMR** (500 MHz, CDCl<sub>3</sub>) δ 8.59 (1H, d, *J* = 4.8 Hz), 7.75 (1H, td, *J* = 7.7, 1.74 Hz), 7.52 (1H, d, *J* = 7.8 Hz), 7.29-7.23 (1H, m), 6.53 (1H, s), 6.34 (1H, d, *J*<sub>H-F</sub> = 46.2 Hz), 6.01 (1H, s), 3.73 (3H, s) ppm. **<sup>13</sup>C NMR** (126 MHz, CDCl<sub>3</sub>) δ 165.4 (d, *J*<sub>C-F</sub> = 5.1 Hz), 157.0 (d, *J*<sub>C-F</sub> = 23.1 Hz), 149.5, 138.2 (d, *J*<sub>C-F</sub> = 20.5 Hz), 137.0, 128.3 (d, *J*<sub>C-F</sub> = 8.8 Hz), 123.6 (d, *J*<sub>C-F</sub> = 1.9 Hz), 121.8 (d, *J*<sub>C-F</sub> = 5.0 Hz), 91.4 (d, *J*<sub>C-F</sub> = 175.1 Hz), 52.2 ppm. **<sup>19</sup>F NMR** (471 MHz, CDCl<sub>3</sub>) δ -183.39 (1F, d, *J*<sub>H-F</sub> = 46.2 Hz) ppm. **HRMS (ESI)** Calculated for C<sub>10</sub>H<sub>11</sub>FO<sub>2</sub><sup>+</sup> ([M+H]<sup>+</sup>) 196.0768. Found 196.077.

### ethyl 2-(fluoro(phenyl)methyl)acrylate (**2p**)

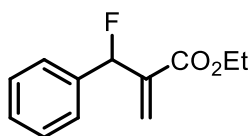

36% yield. Spectroscopic data match with those previously reported.<sup>5b</sup>

**<sup>1</sup>H NMR** (400 MHz, CDCl<sub>3</sub>): δ 7.44-7.30 (5H, m), 6.45 (1H, s), 6.29 (1H, d, *J*<sub>H-F</sub> = 46.2 Hz), 6.01 (1H, s), 4.23-4.10 (2H, m), 1.22 (1H, t, *J* = 7.12 Hz) ppm.

### hexyl 2-(fluoro(phenyl)methyl)acrylate (**2q**)

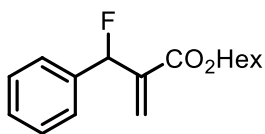

**2q** was prepared following the abovementioned procedure.

**S3q** (2.00 g, 1.0 equiv., 7.6 mmol) was dissolved in 23 mL of CH<sub>2</sub>Cl<sub>2</sub> and the solution was cooled down to -78 °C. Then, DAST (1.5 g, 1.2 equiv., 9.1 mmol) was added dropwise. After 2h, the reaction was quenched and purified. **2q** was obtained in 37% yield (687 mg, 2.8 mmol) as a yellowish oil.

**<sup>1</sup>H NMR** (500 MHz, CDCl<sub>3</sub>) δ 7.42-7.31 (5H, m), 6.46 (1H, dt, *J* = 2.9, 1.01 Hz), 6.27 (1H, d, *J*<sub>H-F</sub> = 46.1 Hz), 6.02 (1H, t, *J* = 1.2 Hz), 4.17-4.02 (2H, m), 1.62-1.53 (2H, m), 1.32-1.19 (6H, m), 0.92-0.82 (3H, m) ppm. **<sup>13</sup>C NMR** (126 MHz, CDCl<sub>3</sub>) δ 165.0 (d, *J*<sub>C-F</sub> = 6.4 Hz), 139.7 (d, *J*<sub>C-F</sub> = 22.5 Hz), 137.6 (d, *J*<sub>C-F</sub> = 20.0 Hz), 129.1 (d, *J*<sub>C-F</sub> = 2.9 Hz), 128.6 (d, *J*<sub>C-F</sub> = 1.1 Hz), 127.3 (d, *J*<sub>C-F</sub> = 5.52 Hz), 125.8 (d, *J*<sub>C-F</sub> = 9.0 Hz), 91.1 (d, *J*<sub>C-F</sub> = 174.0 Hz), 65.3, 31.5, 28.6, 25.6, 22.6, 14.1 ppm. **<sup>19</sup>F NMR** (471 MHz, CDCl<sub>3</sub>) δ -175.60 (1F, d, *J*<sub>H-F</sub> = 46.1 Hz) ppm. **HRMS (ESI)** Calculated for C<sub>16</sub>H<sub>22</sub>FO<sub>2</sub><sup>+</sup> ([M+H]<sup>+</sup>) 265.1598. Found 265.1599.

***tert*-butyl 2-(fluoro(phenyl)methyl)acrylate (2r)**

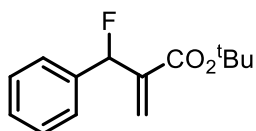

20% yield. Spectroscopic data match with those previously reported.<sup>4</sup>

**<sup>1</sup>H NMR** (400 MHz, CDCl<sub>3</sub>) δ 7.37–7.39 (5H, m), 6.37 (1H, d, *J* = 3.3 Hz) 6.21 (1H, d, *J*<sub>H-F</sub> = 46.5 Hz), 5.94 (1H, s), 1.37 (9H, s) ppm.

**methyl 2-(cyclohexylfluoromethyl)acrylate (2s)**

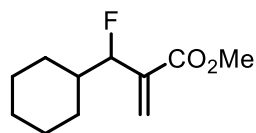

38% yield. Spectroscopic data match with those previously reported.<sup>4</sup>

**<sup>1</sup>H NMR** (400 MHz, CDCl<sub>3</sub>) δ 6.38 (1H, d, *J* = 2.1 Hz), 5.87 (1H, s), 5.12 (1H, dd, *J* = 46.5, 4.2 Hz), 3.78, (3H, s), 1.63-1.76 (6H, m), 1.02-1.26 (5H, m) ppm.

**methyl 3-fluoro-2-methylene-4-phenylbutanoate (2t)**

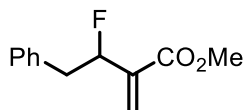

**2t** was prepared following the abovementioned procedure.

**S3t** (300 mg, 1.0 equiv., 1.46 mmol) was dissolved in 4.5 mL of CH<sub>2</sub>Cl<sub>2</sub> and the solution was cooled down to -78 °C. Then, DAST (282 mg, 1.2 equiv., 1.75 mmol) was added dropwise. After 2h, the reaction was quenched and purified. **2t** was obtained in 35% yield (106 mg, 0.51 mmol) as a colourless oil.

**<sup>1</sup>H NMR** (400 MHz, CDCl<sub>3</sub>) δ 7.35 – 7.19 (5H, m), 6.33 (1H, dt, *J* = 3.30, 0.93 Hz), 5.86 (1H, dd, *J* = 1.46, 0.98 Hz), 5.51 (1H, dddd, *J* = 46.63, 7.79, 3.53, 1.47, 0.85 Hz), 3.78 (3H, s), 3.27-3.10 (1H, m), 3.04-2.88 (1H, m). **<sup>13</sup>C NMR** (100 MHz, CDCl<sub>3</sub>) δ 165.5 (d, *J*<sub>C-F</sub> = 7.43 Hz), 139.1 (d, *J*<sub>C-F</sub> = 20.06 Hz), 136.7, 129.7, 128.5, 126.9, 126.1 (d, *J*<sub>C-F</sub> = 9.79 Hz), 91.1 (d, *J*<sub>C-F</sub> = 176.86 Hz), 52.1, 41.7 (d, *J*<sub>C-F</sub> = 22.55 Hz). **<sup>19</sup>F NMR** (471 MHz, CDCl<sub>3</sub>) δ -183.60 (1F, dddd, *J* = 46.63, 31.52, 22.89, 3.22 Hz).

### B.3. General Procedure C – Synthesis of TBS-, TES-, and TIPS-protected silyl enol ethers

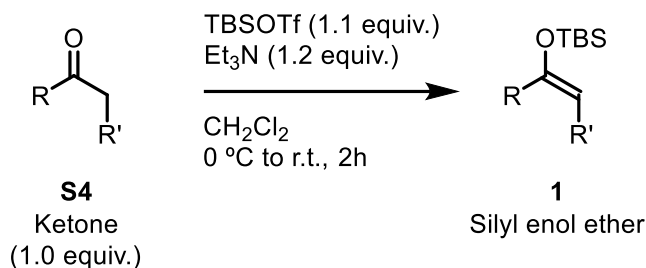

The reaction was carried out following the previously described procedure.<sup>6</sup>

To a flame-dried two necked round bottom flask ketone **S4** (1 equiv., 20 mmol) was added under nitrogen atmosphere and dissolved with freshly distilled CH<sub>2</sub>Cl<sub>2</sub> (0.5 M). Subsequently, triethylamine (1.2 equiv., 24 mmol) was added at room temperature. The mixture was stirred for 5 minutes at room temperature. Then, the reaction mixture was cooled to 0 °C and TBSOTf (1.1 equiv., 22 mmol) was added dropwise. The reaction was stirred for 2 h at room temperature and then quenched with a saturated NH<sub>4</sub>Cl aqueous solution. The aqueous layer was extracted with hexane (3x25 mL). The combined organic layers were dried over MgSO<sub>4</sub> and concentrated under reduced pressure. The crude product **1** was purified by column chromatography on silica gel using hexane as eluent, to afford **1** as an oil.

#### *tert*-butyl(cyclohex-1-en-1-yloxy)dimethylsilane (**1b**)

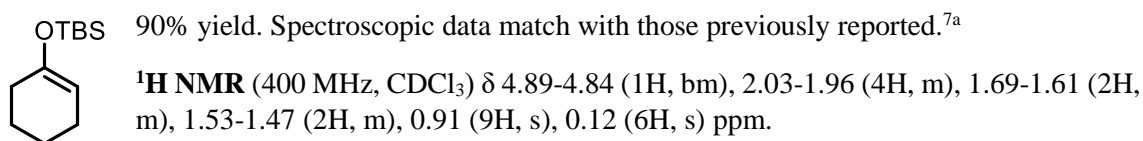

#### (cyclohex-1-en-1-yloxy)triethylsilane (**1c**)

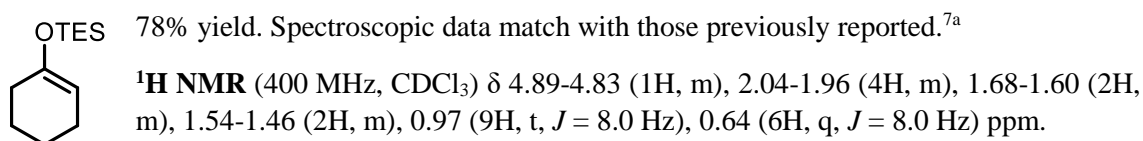

#### (cyclohex-1-en-1-yloxy)triisopropylsilane (**1d**)

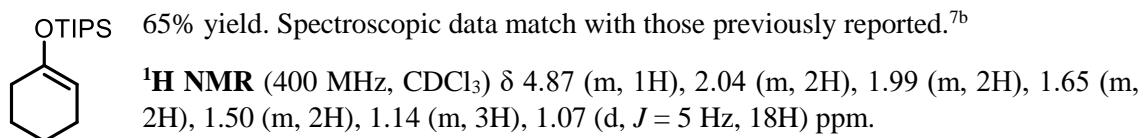

***tert*-butyl(cyclopent-1-en-1-yloxy)dimethylsilane (1e)**

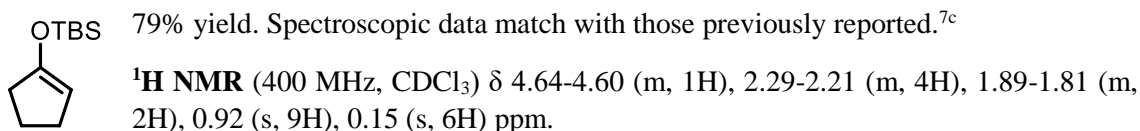

***tert*-butyl(cyclohept-1-en-1-yloxy)dimethylsilane (1f)**

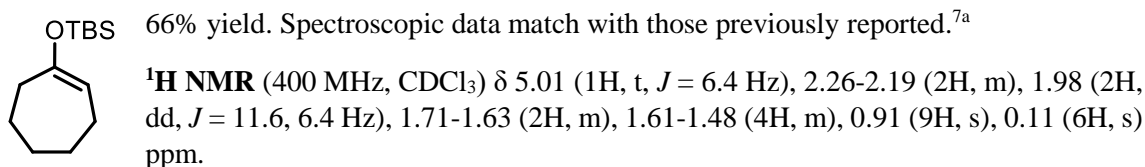

**(*E*)-*tert*-butyl(cyclooct-1-en-1-yloxy)dimethylsilane (1g)**

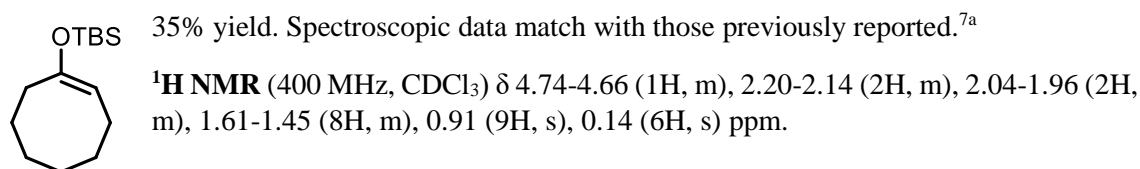

***tert*-butyl((3,6-dihydro-2H-pyran-4-yl)oxy)dimethylsilane (1h)**

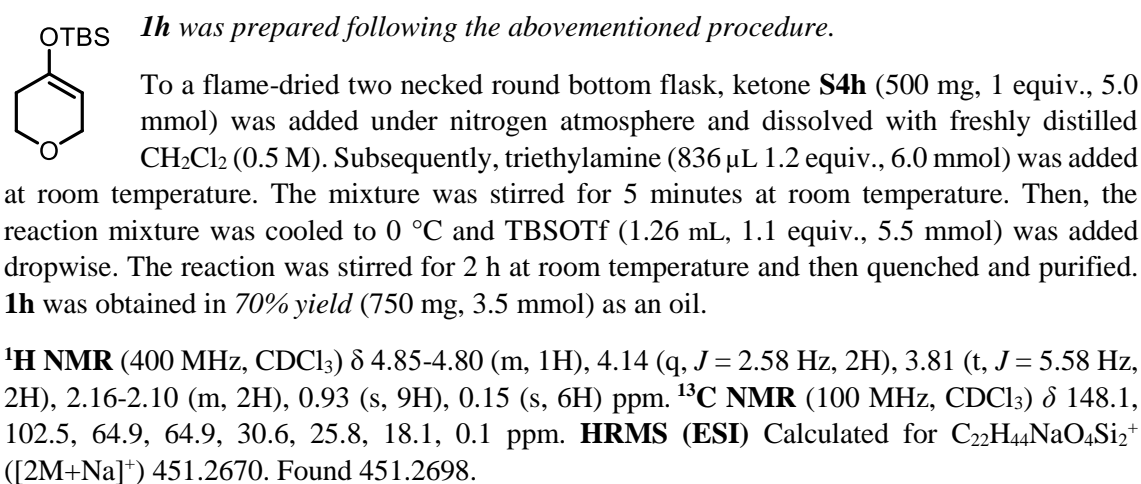

***tert*-butyl((4,4-dimethylcyclohex-1-en-1-yl)oxy)dimethylsilane (1i)**

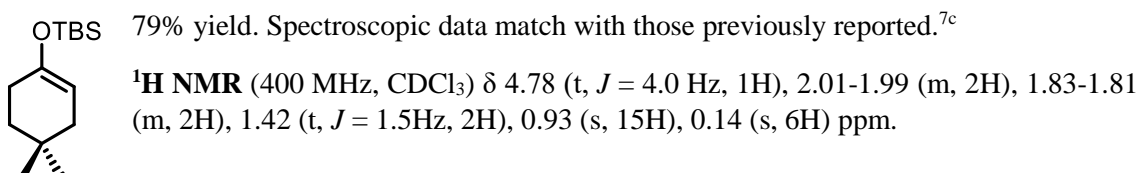

***tert*-butyl((3,4-dihydronaphthalen-1-yl)oxy)dimethylsilane (1j)**

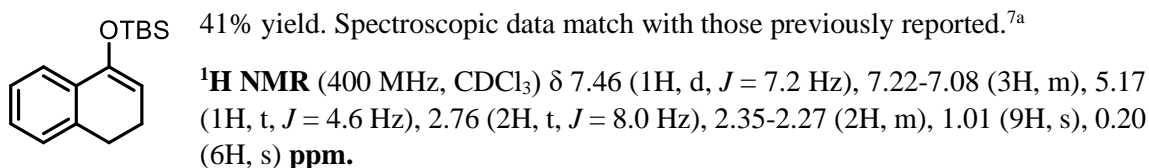

**((1,4-dioxaspiro[4.5]dec-7-en-8-yl)oxy)(*tert*-butyl)dimethylsilane (1k)**

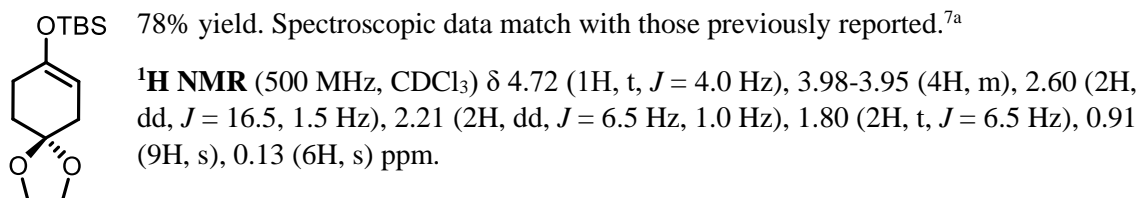

***tert*-butyldimethyl((1-phenylvinyl)oxy)silane (1l)**

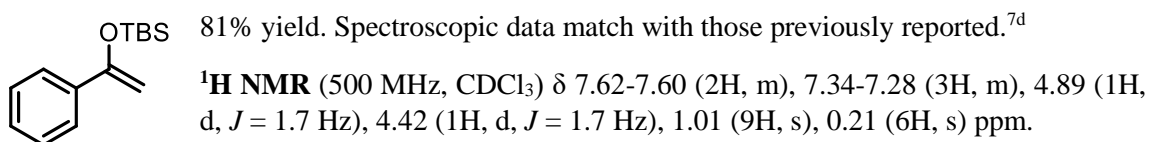

***tert*-butyl((1-(4-methoxyphenyl)vinyl)oxy)dimethylsilane (1m)**

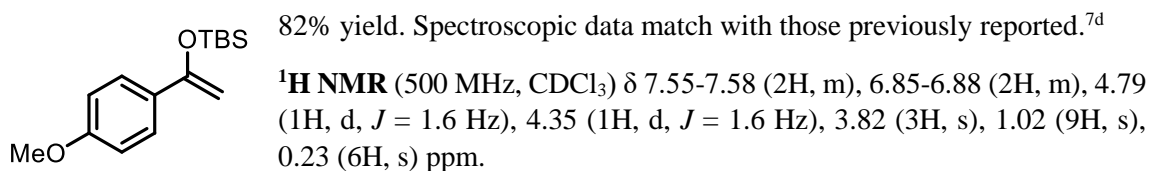

**((1-([1,1'-biphenyl]-4-yl)vinyl)oxy)(*tert*-butyl)dimethylsilane (1n)**

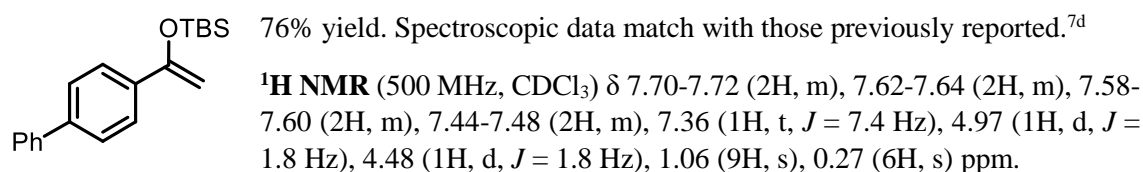

**((1H-inden-3-yl)oxy)(tert-butyl)dimethylsilane (1o)**

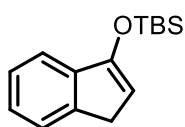

69% yield. Spectroscopic data match with those previously reported.<sup>7e</sup>

<sup>1</sup>H NMR (400 MHz, CDCl<sub>3</sub>) δ 7.28 (2H, dd, *J* = 11.2, 7.6 Hz), 7.19 (1H, t, *J* = 7.6 Hz), 7.10 (1H, t, *J* = 7.6 Hz), 5.30 (1H, s), 3.15 (2H, d, *J* = 2.0 Hz), 0.93 (9H, s), 0.15 (6H, s) ppm.

**tert-butyl((3,4-dihydronaphthalen-2-yl)oxy)dimethylsilane (1p)**

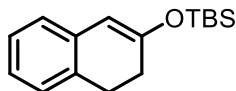

68% yield. Spectroscopic data match with those previously reported.<sup>7f</sup>

<sup>1</sup>H NMR (400MHz, CDCl<sub>3</sub>) δ 7.16-6.86 (4H, m), 5.7 (1H, s), 2.90 (2H, t, *J* = 7.0 Hz), 2.36 (3H, t, *J* = 7.0 Hz), 0.97 (9H, s), 0.22 (6H, s) ppm.

**(Z)-tert-butyl((1,2-diphenylvinyl)oxy)dimethylsilane (1q)**

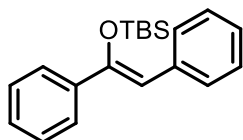

76% yield. Spectroscopic data match with those previously reported.<sup>7g</sup>

<sup>1</sup>H NMR (400MHz, CDCl<sub>3</sub>) δ 7.71-7.63 (4H, m), 7.43-7.26 (5H, m), 7.21-7.16 (1H, m), 6.24 (1H, s), 0.97 (9H, s), -0.22 (6H, s) ppm.

**1-benzyl-4-((tert-butyldimethylsilyl)oxy)-1,2,3,6-tetrahydropyridine (1r)**

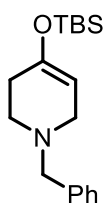

*1r* was prepared following the abovementioned procedure.

To a flame-dried two necked round bottom flask ketone **S4r** (473 mg, 1 equiv., 2.5 mmol) was added under nitrogen atmosphere and dissolved with freshly distilled CH<sub>2</sub>Cl<sub>2</sub> (0.5 M). Subsequently, triethylamine (418 μL, 1.2 equiv., 3.0 mmol) was added at room temperature. The mixture was stirred for 5 minutes at room temperature. Subsequently, it was cooled to 0 °C and TBSOTf (631 μL, 1.1 equiv., 2.75 mmol) was added dropwise. The reaction mixture was stirred for 2 h at room temperature and then quenched and purified. **1r** was obtained in 80% yield (603 mg, 2 mmol) as an oil.

<sup>1</sup>H NMR (500 MHz, Acetone-d<sub>6</sub>) δ 7.36-7.28 (4H, m), 7.26-7.21 (1H, m), 4.79 (1H, m), 3.55 (2H, s), 2.95-2.90 (2H, m) 2.58 (2H, t, *J* = 5.8 Hz), 2.13-2.08 (2H, m), 0.92 (9H, s), 0.15 (6H, s) ppm. <sup>13</sup>C NMR (126 MHz, Acetone-d<sub>6</sub>) δ 149.9, 140.1, 129.6, 129.0, 127.7, 102.5, 62.7, 52.1, 50.8, 31.4, 26.1, 26.0, 18.6 ppm. HRMS (ESI) Calculated for C<sub>18</sub>H<sub>30</sub>NOSi<sup>+</sup> ([M+H]<sup>+</sup>) 304.2091. Found 304.2094.

**(Z)-tert-butyldimethyl((1-phenylbut-1-en-1-yl)oxy)silane (1s)**

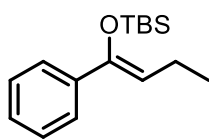

79% yield. Spectroscopic data match with those previously reported.<sup>7a</sup>

<sup>1</sup>H NMR (400 MHz, CDCl<sub>3</sub>)  $\delta$  7.43 (2H, d,  $J$  = 6.8 Hz), 7.31-7.25 (3H, m), 5.09 (1H, t,  $J$  = 7.6 Hz), 2.22 (2H, quin,  $J$  = 7.6 Hz), 1.03 (3H, t,  $J$  = 7.6 Hz), 0.98 (9H, s), -0.05 (6H, s) ppm.

#### B.4. General Procedure D – Synthesis of TMS-protected silyl enol ethers

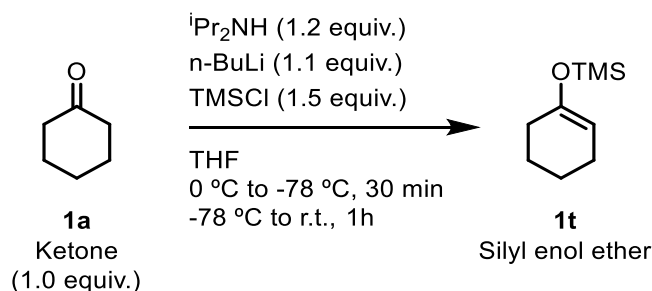

The reaction was carried out following the previously described procedure.<sup>8a</sup>

A flame-dried round bottom flask was charged with *N,N*-diisopropylamine (2.0 mL, 1.2 equiv., 14 mmol) and with dry tetrahydrofuran (20 mL, 0.5 M) under Ar atmosphere. The round-bottom flask was cooled down to  $0\text{ }^\circ\text{C}$  and  $n\text{-BuLi}$  (5.1 mL of a 2.5 M THF solution, 1.1 equiv., 13 mmol) was added dropwise. The reaction mixture was stirred at  $0\text{ }^\circ\text{C}$  for additional 30 min. After cooling down to  $-78\text{ }^\circ\text{C}$  and cyclohexanone (**1a**) (1.2 mL, 1.0 equiv., 12 mmol) followed by trimethylsilyl chloride (2.2 mL, 1.5 equiv., 17 mmol) were added dropwise under Ar. The resulting mixture was stirred for additional 15 min at  $-78\text{ }^\circ\text{C}$ , then it was allowed to warm at room temperature and further stirred for 1 h. Next, the reaction was quenched with 10 mL of aqueous saturated  $\text{NaHCO}_3$  and the resultant mixture was extracted with hexane (2x15 mL). The organic layer was washed with brine (15 mL), dried over  $\text{MgSO}_4$  and concentrated under vacuum. The residue was purified through flash chromatography with silica gel deactivated with triethylamine ( $\text{SiO}_2/\text{Et}_3\text{N}$  5% v/v) using hexane as eluent to give the silyl enol ether **1t** (colourless oil, 72% yield).

#### (cyclohex-1-en-1-yloxy)trimethylsilane (**1t**)

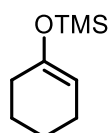

Spectroscopic data match with those previously reported.<sup>7a</sup>

$^1\text{H NMR}$  (400 MHz, Acetone- $d_6$ )  $\delta$  4.88-4.85 (1H, m), 2.03-1.96 (4H, m), 1.68-1.62 (2H, m), 1.53-1.48 (2H, m), 0.18 (9H, s).

## B.5. Synthesis of TBS-protected silyl enol ethers from natural products

### Acetylation of estrone

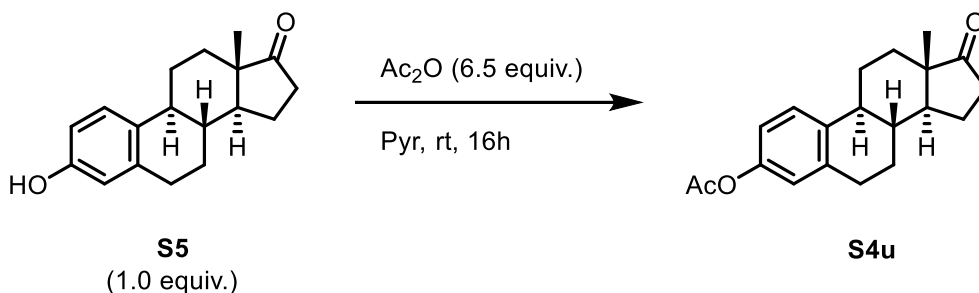

The reaction was carried out following the previously described procedure.<sup>9</sup>

A solution of estrone (**S5**) (1.35 g, 1.0 equiv., 5.0 mmol) in pyridine (7 mL) was cooled to 0 °C. Then, acetic anhydride (3.31 g, 6.5 equiv., 32.5 mmol) was added dropwise and, after 20 min at the same temperature, the reaction was stirred at room temperature for 16 h. The reaction mixture was then poured into ice water (70 mL) and the resulting solid was filtered, washed with water and dried at 60 °C under high vacuum to afford estrone acetate (**S4u**) in quantitative yield.

Spectroscopic data match with those previously reported.<sup>9</sup>

### Silylation of estrone acetate

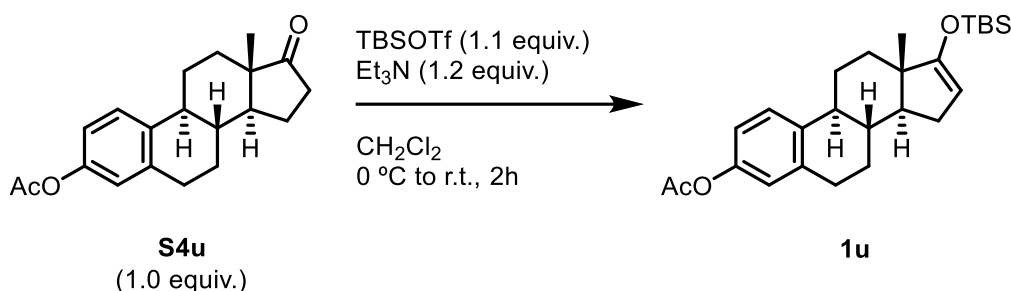

The reaction was carried out following the previously described procedure.<sup>7e</sup>

To a flame-dried two necked round bottom flask ketone **S4u** (780 mg, 1 equiv., 2.5 mmol) was added under nitrogen atmosphere and dissolved with freshly distilled CH<sub>2</sub>Cl<sub>2</sub> (0.5 M). Subsequently, triethylamine (418 µL, 1.2 equiv., 3 mmol) was added at room temperature. The mixture was stirred for 5 minutes at room temperature. Then, the reaction mixture was cooled to 0 °C and TBSOTf (631 µL, 1.1 equiv., 2.75 mmol) was added dropwise. The reaction was stirred for 2 h at room temperature and then quenched with a saturated NH<sub>4</sub>Cl aqueous solution. The aqueous layer was extracted with hexane. The combined organic layers were dried over MgSO<sub>4</sub> and concentrated under reduced pressure. The crude product **1u** was purified by column chromatography on silica gel using hexane as eluent to afford **1u** (940 mg, 88% yield) as a colourless solid.

Spectroscopic data match with those previously reported.<sup>7e</sup>

### Silylation of pregnenolone acetate

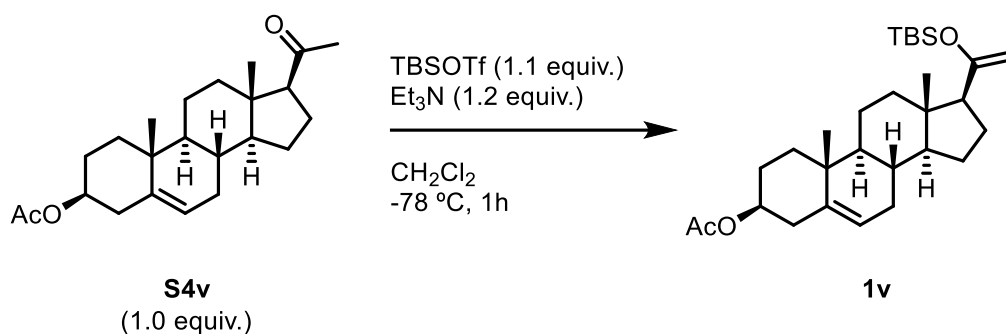

The reaction was carried out following the previously described procedure.<sup>10a</sup>

To a flame-dried two necked round bottom flask ketone **S4v** (896 mg, 1 equiv., 2.5 mmol) was added under nitrogen atmosphere and dissolved with freshly distilled  $\text{CH}_2\text{Cl}_2$  (0.5 M). The reaction mixture was cooled to  $-78\text{ }^\circ\text{C}$ . Then, triethylamine (418  $\mu\text{L}$ , 1.2 equiv., 3 mmol) and TBSOTf (631  $\mu\text{L}$ , 1.1 equiv., 2.75 mmol) were added dropwise. The reaction was stirred for 1 h and then quenched with a saturated  $\text{NH}_4\text{Cl}$  aqueous solution at room temperature. The aqueous layer was extracted with  $\text{CH}_2\text{Cl}_2$ . The combined organic layers were dried over  $\text{MgSO}_4$  and concentrated under reduced pressure. The crude product was purified by column chromatography on silica gel using hexane as eluent to afford **1v** (1 g, 85% yield) as a colourless solid.

Spectroscopic data match with those previously reported.<sup>10a</sup>

### Silylation of (+)-camphor

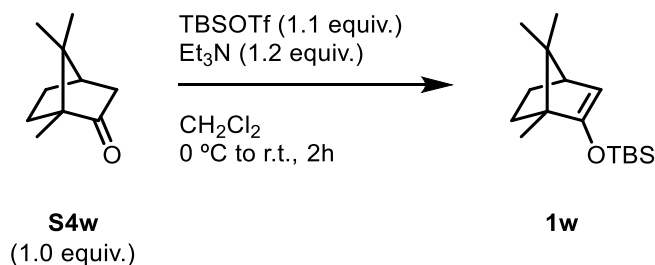

The reaction was carried out following the previously described procedure.<sup>10b</sup>

To a flame-dried two necked round bottom flask ketone **S4w** (380 mg, 1 equiv., 2.5 mmol) was added under nitrogen atmosphere and dissolved with freshly distilled  $\text{CH}_2\text{Cl}_2$  (0.5 M). Subsequently, triethylamine (418  $\mu\text{L}$ , 1.2 equiv., 3 mmol) was added at room temperature. The mixture was stirred for 5 minutes at room temperature. Then, the reaction mixture was cooled to  $0\text{ }^\circ\text{C}$  with and TBSOTf (631  $\mu\text{L}$ , 1.1 equiv., 2.75 mmol) was added dropwise. The reaction was stirred for 2 h at room temperature and then quenched with a saturated  $\text{NH}_4\text{Cl}$  aqueous solution. The aqueous layer was extracted with hexane. The combined organic layers were dried over  $\text{MgSO}_4$  and concentrated under reduced pressure. The crude product was purified by column chromatography on silica gel using hexane as eluent to afford **1w** (505 mg, 78% yield) as an oil.

Spectroscopic data match with those previously reported.<sup>10b</sup>

### B.6. Synthesis of *tert*-butyldimethyl((2-methylcyclohex-1-en-1-yl)oxy)silane

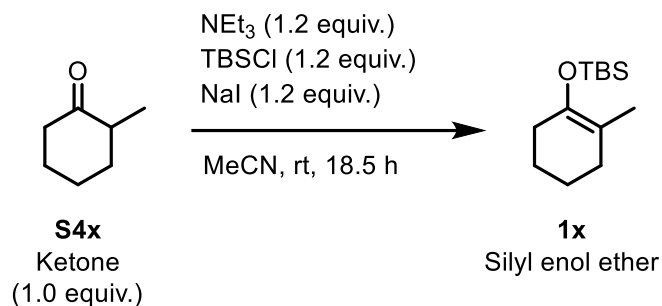

The reaction was carried out following the previously described procedure.<sup>8b</sup>

A nitrogen-purged, 250-mL round-bottomed flask is equipped with a magnetic stirring bar. The flask is charged with 2-methylcyclohexanone (10.0 mL, 1 equiv., 82.6 mmol), triethylamine (13.9 mL, 1.2 equiv., 100 mmol), and *t*-butyldimethylsilyl chloride (TBSCl) (15.1 g, 1.2 equiv., 100 mmol). To the flask is added a solution of sodium iodide (15.0 g, 1.2 equiv., 100 mmol) in acetonitrile (100 mL) via syringe over 30 min at ambient temperature. The reaction solution is stirred at ambient temperature for 18 h. The resulting mixture is quenched by addition of saturated sodium bicarbonate solution (100 mL). The mixture is extracted with hexane twice ( $2 \times 200$  mL). The combined organic phases are washed with brine (40 mL) and dried over  $\text{MgSO}_4$ , filtered and concentrated at reduced pressure the crude product as a pale yellow oil. This crude product is purified by filtration through a silica gel pad with *n*-hexanes to provide 17.8 g **1x**. (colourless oil, 95% yield.)

#### *tert*-butyldimethyl((2-methylcyclohex-1-en-1-yl)oxy)silane (**1x**)

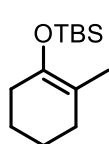

Spectroscopic data match with those previously reported.<sup>8b</sup>

<sup>1</sup>H NMR (400 MHz,  $\text{CDCl}_3$ )  $\delta$  1.98-2.02 (2H, m), 1.92-1.95 (2H, m), 1.60-1.66 (2H, m), 1.56 (3H, s), 1.51-1.55 (2H, m), 0.94 (9H, s), 0.10 (6H, s).

## B.7. Synthesis of Starting Materials for the control experiments

### General procedure for synthesis of allyl carbonate and acetate

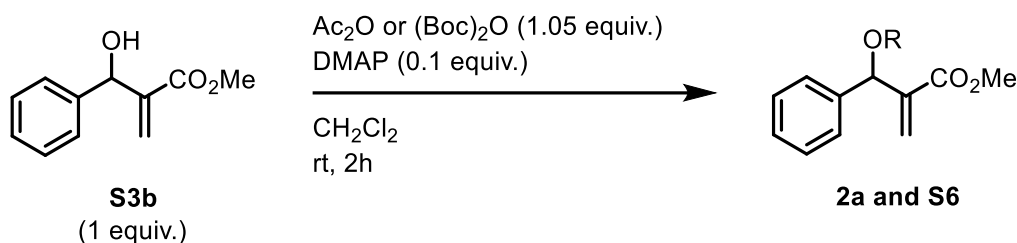

The reaction was carried out following the previously described procedure.<sup>2</sup>

To a solution of 1.0 equiv. of the Morita-Baylis-Hillman alcohol **S3b** in CH<sub>2</sub>Cl<sub>2</sub> (0.5 M), 1.05 equiv. of the corresponding anhydride and 0.1 equiv. of 4-dimethylaminopyridine (DMAP) were added. The solution was stirred until consumption of starting material (monitored by TLC). Then, the solvent was removed by rotary evaporation and the reaction mixture was purified by flash column chromatography on silica gel (hexane/EtOAc mixtures).

### methyl 2-(((tert-butoxycarbonyl)oxy)(phenyl)methyl)acrylate (**2a**)

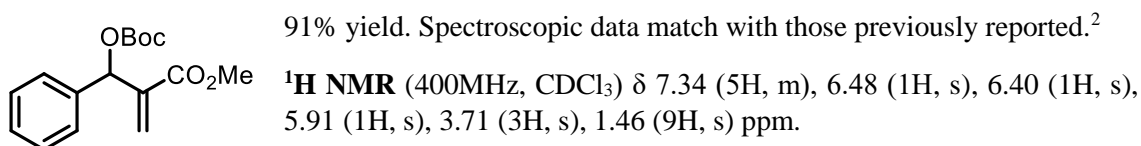

### methyl 2-(acetoxyl(phenyl)methyl)acrylate (**S6**)

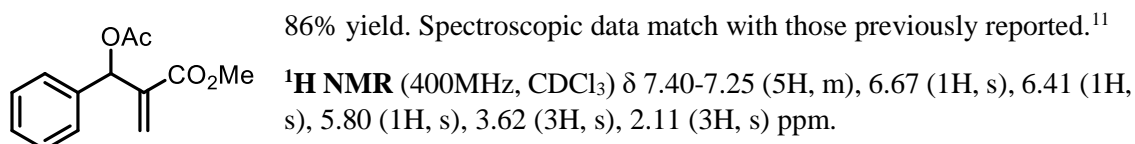

### General procedure for synthesis of Enol Adducts

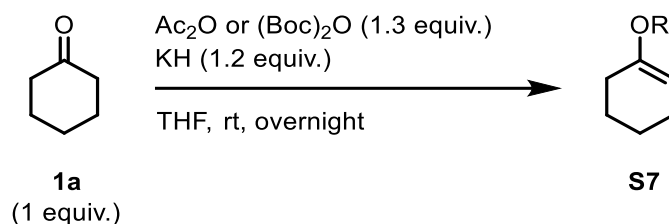

The reaction was carried out following the previously described procedure.<sup>12</sup>

Into a 100 mL round-bottom flask under argon was added KH (0.94 g, 1.2 equiv., 23.4 mmol). Then, dry THF (55 mL) and cyclohexanone **1a** (2.0 g, 1.0 equiv., 20.4 mmol) were consecutively added dropwise via syringe over a 10 min period. After 15 min, the resulting mixture was treated by the dropwise addition of the corresponding anhydride (1.3 equiv., 26.5 mmol). After the addition, the mixture was stirred at room temperature overnight. The reaction mixture was quenched with 35 mL of Na<sub>2</sub>CO<sub>3</sub> (sat.) and then extracted three times with 25 mL of Et<sub>2</sub>O. The combined ether layers were washed twice with 25 mL of Na<sub>2</sub>CO<sub>3</sub> (sat.) and once with brine, dried with MgSO<sub>4</sub> and concentrated under vacuum pressure. The crude product was purified by flash column chromatography obtaining a colourless oil.

Spectroscopic data for all compounds matched with those previously reported in literature.<sup>12</sup>

#### *tert*-butyl cyclohex-1-en-1-yl carbonate (**S7a**)

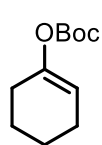

**S7a** was prepared following the abovementioned procedure.

90% yield. <sup>1</sup>H NMR (500 MHz, Acetone-d<sub>6</sub>) δ 5.38-5.34 (1H, m), 2.16-2.10 (2H, m), 2.10-2.06 (2H, m), 1.74-1.67 (2H, m), 1.60-1.53 (2H, m), 1.46 (9H, s) ppm. <sup>13</sup>C NMR (126 MHz, Acetone-d<sub>6</sub>) δ 152.5, 149.5, 114.1, 82.6, 27.9, 27.3, 24.3, 23.5, 22.6 ppm.

**HRMS (ESI)** Calculated for C<sub>11</sub>H<sub>19</sub>O<sub>3</sub><sup>+</sup> ([M+H]<sup>+</sup>) 199.1329. Found 199.1332.

#### cyclohex-1-en-1-yl acetate (**S7b**)

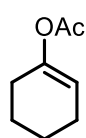

**S7b** was prepared following the abovementioned procedure.

81% yield. <sup>1</sup>H NMR (400MHz, CDCl<sub>3</sub>) δ 5.33 (1H, t, *J* = 3.8 Hz), 2.13-2.04 (7H, m), 1.76-1.66 (2H, m), 1.61-1.52 (2H, m) ppm.

### C. Defluorinative Allylation of Silyl Enol Ethers – Racemic reaction

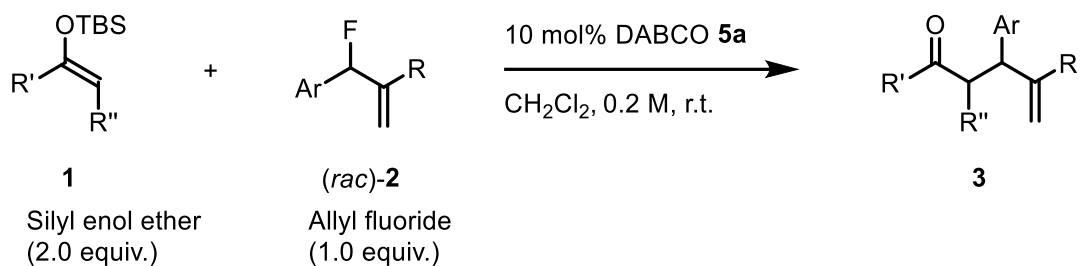

The corresponding allyl fluoride **2** (1 equiv., 0.2 mmol) was weighted into a 5 mL vial equipped with a magnetic stirring bar and dissolved with 1 mL of distilled CH<sub>2</sub>Cl<sub>2</sub> (0.2 M). Subsequently, the corresponding silyl enol ether **1** (2 equiv., 0.4 mmol) and a 10 mol% of DABCO **5a** were added. The reaction mixture was stirred at room temperature until full conversion of the starting material was detected either by <sup>1</sup>H NMR or by TLC analysis. The crude product **3** was directly purified by flash column chromatography on silica gel using hexane and ethyl acetate mixtures as eluents.

## D. Optimization of the Asymmetric Reaction

### D.1. Optimization – Catalyst screening

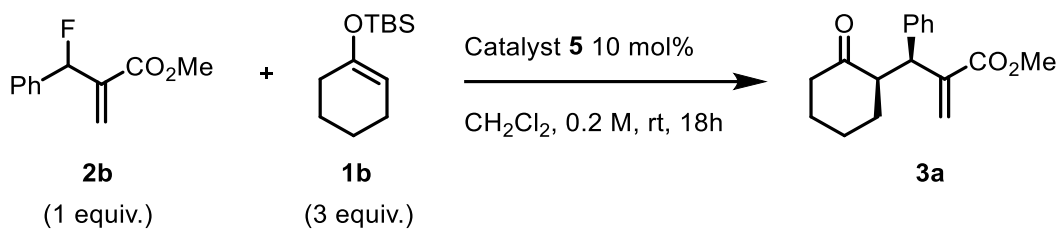

| Entry | Catalyst <sup>[c]</sup>            | NMR yield (%) <sup>[a]</sup> | r.r.  | d.r.  | e.r. <sup>[b]</sup> |
|-------|------------------------------------|------------------------------|-------|-------|---------------------|
| 1     | (-)-Cinchonidine <b>5c</b>         | 48                           | 4:1   | >20:1 | 38:62               |
| 2     | Quinine <b>5d</b>                  | 9                            | 6:1   | >20:1 | 42:58               |
| 3     | Quinidine benzoate <b>5e</b>       | <5                           | 10:1  | >20:1 | 61:39               |
| 4     | Cinchonidine benzoate <b>5f</b>    | <5                           | 10:1  | >20:1 | 36:64               |
| 5     | β-isocupreidine <b>5g</b>          | 47                           | 5:1   | >20:1 | 31:69               |
| 6     | Thiourea quinine <b>5h</b>         | -                            | -     | -     | -                   |
| 7     | Squaramide cinchonidine <b>5i</b>  | -                            | -     | -     | -                   |
| 8     | (DHQ) <sub>2</sub> PYR <b>5j</b>   | 64                           | 3:1   | >20:1 | 39:61               |
| 9     | (DHQD) <sub>2</sub> AQN <b>5k</b>  | 26                           | 1:1f  | 5:1   | 21:79               |
| 10    | (DHQD) <sub>2</sub> PHAL <b>5b</b> | 61                           | >20:1 | >20:1 | 82:17               |

**Table S1.** Optimisation of the chiral Lewis base catalyst used in this study. <sup>[a]</sup> The yield was determined by <sup>1</sup>H NMR spectroscopy using 1,3,5-trimethoxybenzene as the internal standard, <sup>[b]</sup> Determined by HPLC analysis using a chiral column.

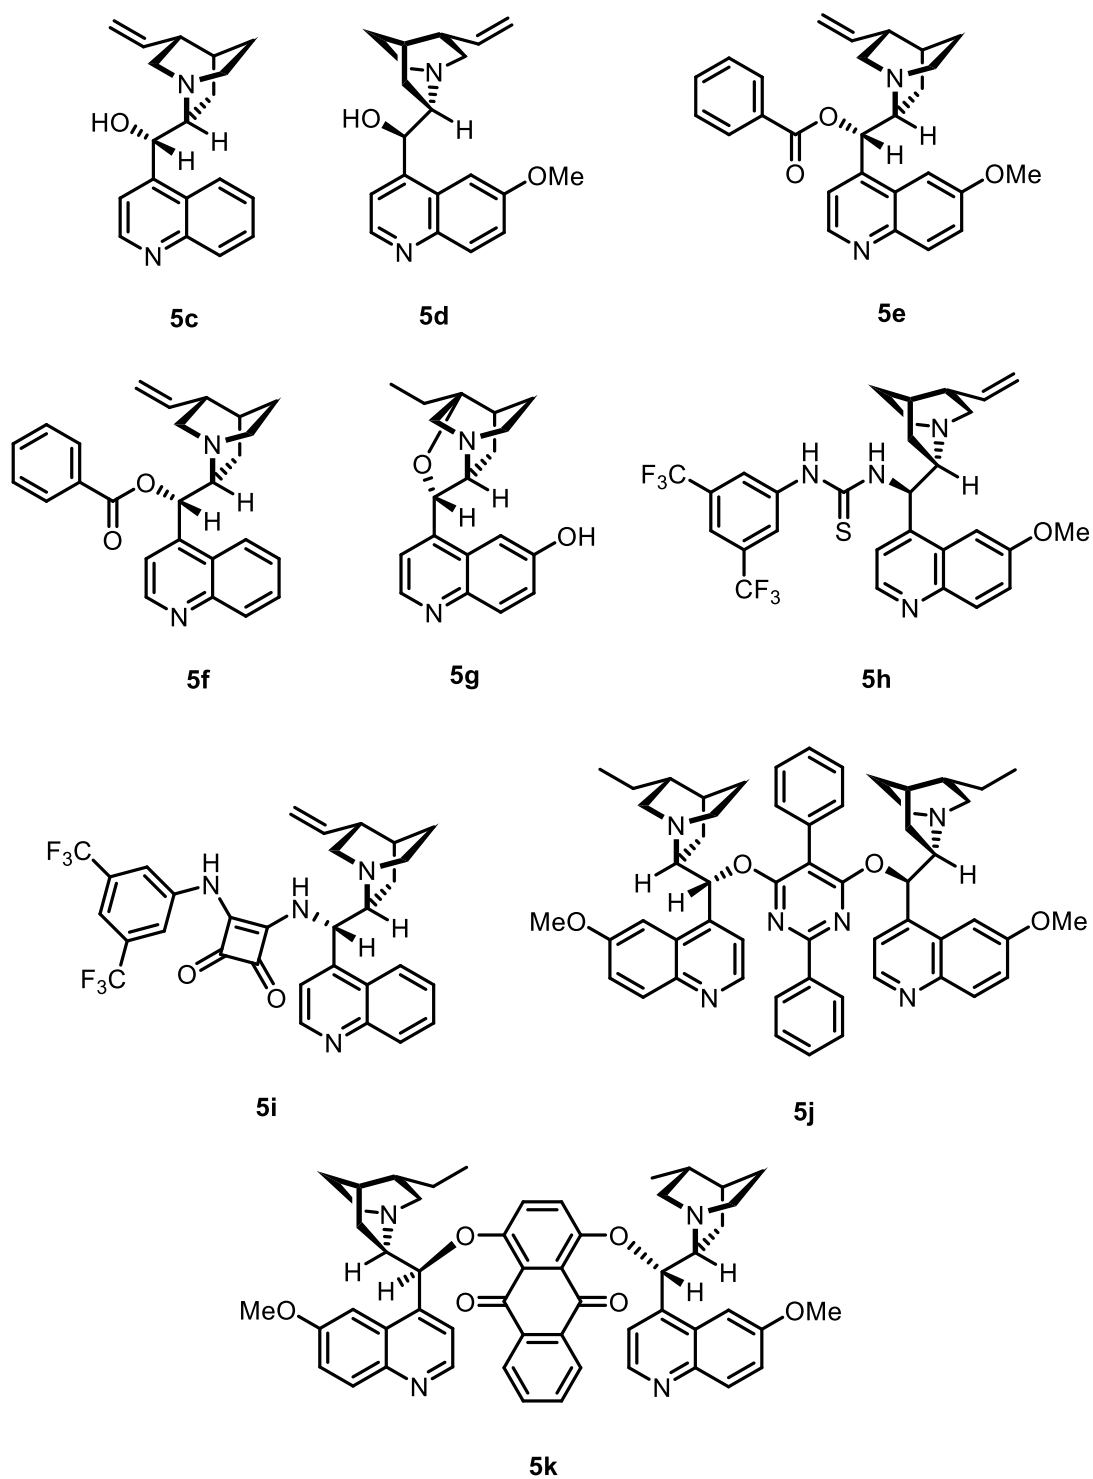

**Figure S1. Catalysts 5c-k.**

## D.2. Optimization – Solvent screening

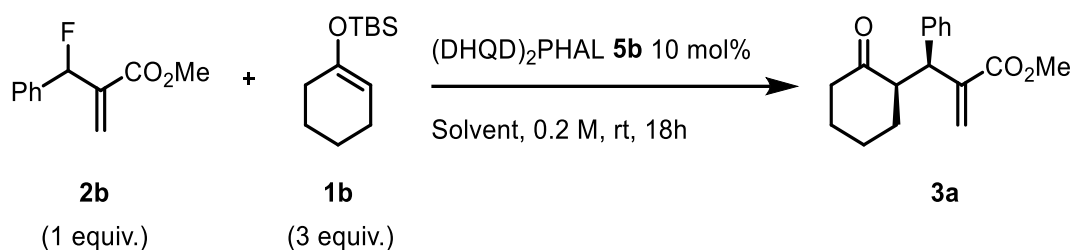

| Entry | Solvent                                 | NMR yield (%) <sup>[a]</sup> | r.r.  | d.r.  | e.r. <sup>[b]</sup> |
|-------|-----------------------------------------|------------------------------|-------|-------|---------------------|
| 1     | CH <sub>2</sub> Cl <sub>2</sub>         | 61                           | >20:1 | >20:1 | 82:17               |
| 2     | DCE                                     | 40                           | >20:1 | >20:1 | 68:32               |
| 3     | CHCl <sub>3</sub>                       | 7                            | 5:1   | >20:1 | 92:8                |
| 4     | Toluene                                 | nr                           | -     | -     | -                   |
| 5     | PhCF <sub>3</sub>                       | nr                           | -     | -     | -                   |
| 6     | 1,2-DCB                                 | 25                           | 6:1   | >20:1 | 73:27               |
| 7     | Acetone                                 | 30                           | 1.5:1 | >20:1 | 88:12               |
| 8     | THF                                     | 9                            | 10:1  | >20:1 | 95:5                |
| 9     | Dioxane                                 | nr                           | -     | -     | -                   |
| 10    | THP                                     | 22                           | 10:1  | >20:1 | 81:19               |
| 11    | 2-MeTHF                                 | 5                            | 8:1   | >20:1 | 92:8                |
| 12    | THF 1:1 CH <sub>2</sub> Cl <sub>2</sub> | 55                           | 18:1  | >20:1 | 88:12               |
| 13    | THF 9:1 CH <sub>2</sub> Cl <sub>2</sub> | 20                           | 14:1  | >20:1 | 95:5                |
| 14    | THF 1:9 CH <sub>2</sub> Cl <sub>2</sub> | 65                           | 19:1  | >20:1 | 79:21               |
| 15    | THF 8:2 CH <sub>2</sub> Cl <sub>2</sub> | 47                           | 14:1  | >20:1 | 93:7                |
| 16    | THF 6:4 CH <sub>2</sub> Cl <sub>2</sub> | 25                           | 15:1  | >20:1 | 89:11               |

**Table S2.** Solvent optimisation. <sup>[a]</sup> The yield was determined by <sup>1</sup>H NMR spectroscopy using 1,3,5-trimethoxybenzene as the internal standard, <sup>[b]</sup> Determined by HPLC analysis using a chiral column. DCE: dichloroethane, 1,2-DCB: 1,2-dichlorobenzene, THF: tetrahydrofuran, THP: tetrahydropyran.

### D.3. Optimization – Substituent at the silyl group screening

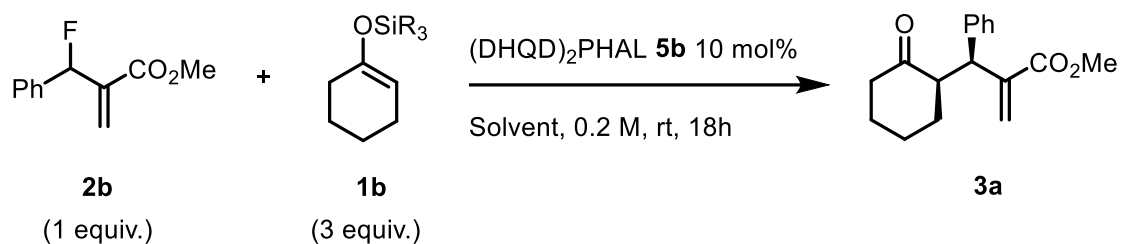

| Entry | Silyl group | Solvent                                    | NMR yield (%) <sup>[a]</sup> | r.r.  | d.r.  | e.r. <sup>[b]</sup> |
|-------|-------------|--------------------------------------------|------------------------------|-------|-------|---------------------|
| 1     | TMS         | CH <sub>2</sub> Cl <sub>2</sub>            | 80                           | 17:1  | >20:1 | 85:15               |
| 2     | TES         | CH <sub>2</sub> Cl <sub>2</sub>            | 71                           | >20:1 | >20:1 | 85:15               |
| 3     | TIPS        | CH <sub>2</sub> Cl <sub>2</sub>            | 18                           | 12:1  | >20:1 | 85:15               |
| 4     | TMS         | THF                                        | 20                           | 7:1   | >20:1 | 93:7                |
| 5     | TES         | THF                                        | 11                           | 6:1f  | >20:1 | 94:6                |
| 6     | TIPS        | THF                                        | <5                           | 10:1  | >20:1 | 76:24               |
| 7     | TMS         | THF 9:1<br>CH <sub>2</sub> Cl <sub>2</sub> | 31                           | 11:1  | >20:1 | 89:11               |
| 8     | TES         | THF 9:1<br>CH <sub>2</sub> Cl <sub>2</sub> | 31                           | 9:1   | >20:1 | 88:12               |
| 9     | TBS         | THF 9:1<br>CH <sub>2</sub> Cl <sub>2</sub> | 20                           | 14:1  | >20:1 | 95:5                |

**Table S3.** Screening of the substituent at the silyl group of the silyl enol ether. <sup>[a]</sup> The yield was determined by <sup>1</sup>H NMR spectroscopy using 1,3,5-trimethoxybenzene as the internal standard, <sup>[b]</sup> Determined by HPLC analysis using a chiral column.

### D.4. Optimization – Temperature, concentration, catalyst loading and time screening

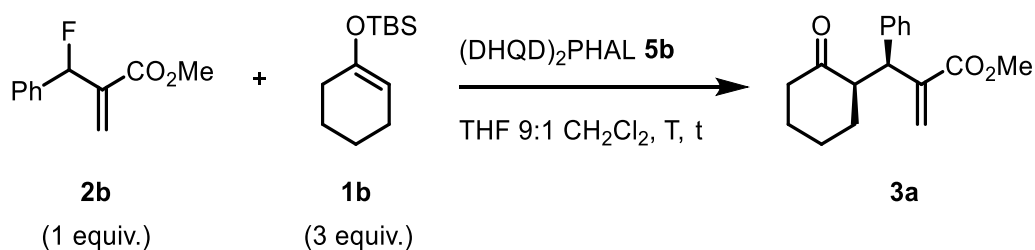

| Entry | Temp. (°C) | Conc. (M) | Cat. loading (mol%) | Time (h) | NMR yield (%) <sup>[a]</sup> | r.r.  | d.r.  | e.r. <sup>[b]</sup> |
|-------|------------|-----------|---------------------|----------|------------------------------|-------|-------|---------------------|
| 1     | 25         | 0.2       | 10                  | 18       | 20                           | 14:1  | >20:1 | 95:5                |
| 2     | -20        | 0.2       | 10                  | 18       | 20                           | >20:1 | >20:1 | 95:5                |
| 3     | 40         | 0.2       | 10                  | 18       | 30                           | 4:1   | >20:1 | 93:7                |
| 4     | 25         | 0.4       | 10                  | 72       | 71 <sup>[c]</sup>            | 13:1  | >20:1 | 91:9                |
| 5     | 25         | 0.4       | 20                  | 72       | 76 <sup>[c]</sup>            | 12:1  | >20:1 | 89:11               |
| 6     | 25         | 0.2       | 20                  | 72       | 75 <sup>[c]</sup>            | 14:1  | >20:1 | 95:5                |

**Table S4.** Optimisation of the temperature, concentration, catalyst loading and time. <sup>[a]</sup> The yield was determined by <sup>1</sup>H NMR spectroscopy using 1,3,5-trimethoxybenzene as the internal standard, <sup>[b]</sup> Determined by HPLC analysis using a chiral column. <sup>[c]</sup> Isolated yield.



**methyl 2-((S)-((R)-8-oxo-1,4-dioxaspiro[4.5]decan-7-yl)(phenyl)methyl)acrylate (3c)**

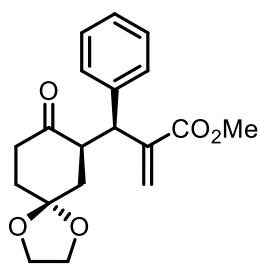

*3c* was prepared following the abovementioned procedure.

73% yield (50 mg, 0.15 mmol), orange solid.  $^1\text{H}$  NMR (400 MHz,  $\text{CDCl}_3$ )  $\delta$  7.35-7.19 (5H, m), 6.24 (1H, s), 5.64 (1H, s), 4.30 (1H, d,  $J$  = 10.98 Hz), 4.06-3.83 (4H, m), 3.73 (3H, s), 3.52 (1H, td,  $J$  = 11.70, 5.43 Hz), 2.72 (1H, td,  $J$  = 13.38, 6.39 Hz), 2.56 (1H, t,  $J$  = 7.06 Hz), 2.50-2.41 (1H, m), 2.15-2.08 (1H, m), 2.04-1.94 (1H, m), 1.77-1.69 (1H, m);  $^{13}\text{C}$  NMR (100 MHz,  $\text{CDCl}_3$ )  $\delta$  210.3, 167.2, 143.5, 140.3, 128.6, 128.6, 126.8, 122.3, 107.5, 64.8, 64.6, 52.0, 50.3, 45.1, 39.9, 38.7, 38.3, 35.7, 34.0. **HRMS (ESI)** Calculated for  $\text{C}_{19}\text{H}_{23}\text{O}_5^+$  ( $[\text{M}+\text{H}]^+$ ) 331.154. Found 331.1546.  $[\alpha]_{\text{D}}^{25}$  = +113.6 ( $c$  = 2.34,  $\text{CHCl}_3$ ). **HPLC** Phenomenex Lux Cellulose-5 (90:10 *n*-hexane: 2-propanol, 1 mL/min, 218 nm); tr (major) = 31.0, tr (minor) = 54.0 (95:5 e.r.)

**methyl 2-((S)-((S)-4-oxotetrahydro-2H-pyran-3-yl)(phenyl)methyl)acrylate (3d)**

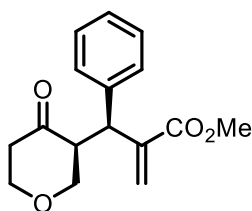

*3d* was prepared following the abovementioned procedure.

68% yield (37 mg, 0.14 mmol), yellow solid.  $^1\text{H}$  NMR (500 MHz,  $\text{CDCl}_3$ )  $\delta$  7.41-7.15 (5H, m), 6.31 (1H, s), 5.77 (1H, s), 4.43 (1H, d,  $J$  = 11.78 Hz), 4.09-3.87 (2H, m), 3.69 (3H, s), 3.65 (1H, dd,  $J$  = 11.52, 4.37 Hz), 3.47 (1H, dd,  $J$  = 11.60, 6.59 Hz), 3.23-3.14 (1H, m), 2.69-2.58 (1H, m), 2.55-2.44 (1H, m);  $^{13}\text{C}$  NMR (126 MHz,  $\text{CDCl}_3$ )  $\delta$  207.8, 167.0, 141.6, 139.3, 128.9, 128.6, 127.3, 124.8, 72.0, 69.6, 56.2, 52.1, 43.8, 42.7. **HRMS (ESI)** Calculated for  $\text{C}_{16}\text{H}_{19}\text{O}_4^+$  ( $[\text{M}+\text{H}]^+$ ) 275.1278. Found 275.1286.  $[\alpha]_{\text{D}}^{25}$  = +135.7 ( $c$  = 2.56,  $\text{CHCl}_3$ ). **HPLC** Phenomenex Lux Cellulose-5 (90:10 *n*-hexane: 2-propanol, 1 mL/min, 218 nm); tr (major) = 19.2, tr (minor) = 29.4 (95:5 e.r.)

**methyl 2-((S)-((S)-1-benzyl-4-oxopiperidin-3-yl)(phenyl)methyl)acrylate (3e)**

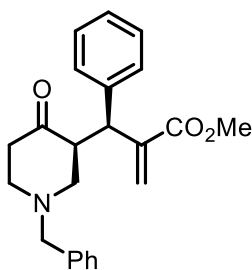

*3e* was prepared following the abovementioned procedure.

72% yield (52 mg, 0.14 mmol), yellow solid.  $^1\text{H}$  NMR (500 MHz,  $\text{CDCl}_3$ )  $\delta$  7.43-7.30 (5H, m), 7.28-7.18 (5H, m), 6.35 (1H, s), 5.83 (1H, s), 4.63 (1H, d,  $J$  = 11.70 Hz), 3.74 (3H, s), 3.50 (2H, dd,  $J$  = 24.67, 13.02 Hz), 3.25-3.17 (1H, m), 2.84-2.76 (1H, m), 2.76-2.69 (1H, m), 2.66-2.59 (2H, m), 2.49-2.40 (2H, m);  $^{13}\text{C}$  NMR (126 MHz,  $\text{CDCl}_3$ )  $\delta$  210.6, 167.2, 141.9, 140.0, 138.0, 129.1, 128.6, 128.6, 128.4, 127.4, 127.0, 124.8, 61.8, 58.0, 54.8, 54.1, 52.1, 44.8, 40.8. **HRMS (ESI)** Calculated for  $\text{C}_{23}\text{H}_{26}\text{NO}_3^+$  ( $[\text{M}+\text{H}]^+$ ) 364.1907. Found 364.1913.  $[\alpha]_{\text{D}}^{25}$  = +124.4 ( $c$  = 2.13,  $\text{CHCl}_3$ ). **HPLC** Phenomenex Lux Amylose-2 (95:5 *n*-hexane: 2-propanol, 1 mL/min, 218 nm); tr (minor) = 20.0, tr (major) = 22.8 (90:10 e.r.)

**methyl 2-((S)-((R)-2-oxocyclopentyl)(phenyl)methyl)acrylate (3f)**

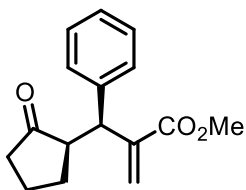

*3f* was prepared following the abovementioned procedure.

70% yield (36 mg, 0.14 mmol), yellow oil.  $^1\text{H NMR}$  (400 MHz,  $\text{CDCl}_3$ )  $\delta$  7.31-7.13 (5H, m), 6.36 (1H, s), 5.70 (1H, s), 4.33 (1H, d,  $J = 7.16$  Hz), 3.65 (3H, s), 2.84-2.73 (1H, m), 2.33-2.21 (1H, m), 2.08-1.96 (2H, m), 1.82-1.68 (2H, m), 1.50-1.45 (1H, m);  $^{13}\text{C NMR}$  (100 MHz,  $\text{CDCl}_3$ )  $\delta$  218.9, 167.3, 142.6, 140.5, 128.7, 128.5, 126.9, 124.7, 52.1, 46.4, 38.4, 28.1, 20.5. **HRMS (ESI)** Calculated for  $\text{C}_{16}\text{H}_{19}\text{O}_3^+$  ( $[\text{M}+\text{H}]^+$ ) 259.1329. Found 259.1324.  $[\alpha]_{\text{D}}^{25} = +163.5$  ( $c = 2.07$ ,  $\text{CHCl}_3$ ). **HPLC** (for major diastereomer) Phenomenex Lux Cellulose-5 (80:20 *n*-hexane: 2-propanol, 1 mL/min, 218 nm); tr (major) = 13.0, tr (minor) = 20.5 (93:7 e.r.)

**methyl 2-((S)-((R)-2-oxocycloheptyl)(phenyl)methyl)acrylate (3g)**

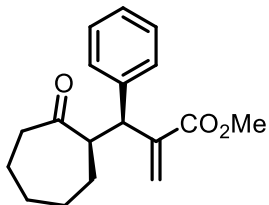

*3g* was prepared following the abovementioned procedure.

75% yield (43 mg, 0.15 mmol), orange solid.  $^1\text{H NMR}$  (400 MHz,  $\text{CDCl}_3$ )  $\delta$  7.32-7.17 (5H, m), 6.18 (1H, s), 5.64 (1H, s), 4.22 (1H, d,  $J = 11.60$  Hz), 3.66 (3H, s), 3.37 (1H, td,  $J = 11.07, 3.27$  Hz), 2.59-2.40 (2H, m), 2.43-2.36 (2H, m), 1.96-1.78 (2H, m), 1.24-1.19 (2H, m), 1.18-1.06 (2H, m);  $^{13}\text{C NMR}$  (100 MHz,  $\text{CDCl}_3$ )  $\delta$  214.5, 167.1, 143.3, 140.9, 128.9, 128.6, 126.9, 123.5, 55.0, 52.0, 47.8, 43.7, 30.3, 28.8, 28.3, 23.8. **HRMS (ESI)** Calculated for  $\text{C}_{18}\text{H}_{23}\text{O}_3^+$  ( $[\text{M}+\text{H}]^+$ ) 287.1642. Found 287.1644.  $[\alpha]_{\text{D}}^{25} = +90.4$  ( $c = 1.95$ ,  $\text{CHCl}_3$ ). **HPLC** Phenomenex Lux Cellulose-5 (80:20 *n*-hexane: 2-propanol, 1 mL/min, 218 nm); tr (major) = 11.1, tr (minor) = 27.5 (95:5 e.r.)

**methyl 2-((S)-((R)-2-oxocyclooctyl)(phenyl)methyl)acrylate (3h)**

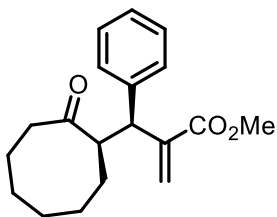

*3h* was prepared following the abovementioned procedure.

88% yield (53 mg, 0.18 mmol), orange solid.  $^1\text{H NMR}$  (500 MHz,  $\text{CDCl}_3$ )  $\delta$  7.30-7.23 (4H, m), 7.23-7.14 (1H, m), 6.18 (1H, s), 5.72 (1H, s), 4.17 (1H, d,  $J = 11.60$  Hz), 3.64 (3H, s), 3.53 (1H, td,  $J = 11.23, 3.86$  Hz), 2.46-2.30 (2H, m), 2.23-2.08 (1H, m), 1.92-1.79 (1H, m), 1.68-1.57 (1H, m), 1.57-1.49 (2H, m), 1.49-1.42 (2H, m), 1.41-1.28 (2H, m), 0.92-0.78 (1H, m);  $^{13}\text{C NMR}$  (126 MHz,  $\text{CDCl}_3$ )  $\delta$  218.7, 166.9, 143.0, 140.8, 128.8, 128.6, 126.9, 124.1, 52.3, 52.0, 49.4, 44.7, 33.7, 28.7, 25.1, 23.5. **HRMS (ESI)** Calculated for  $\text{C}_{19}\text{H}_{25}\text{O}_3^+$  ( $[\text{M}+\text{H}]^+$ ) 301.1798. Found 301.1804.  $[\alpha]_{\text{D}}^{25} = +38.9$  ( $c = 2.15$ ,  $\text{CHCl}_3$ ). **HPLC** Phenomenex Lux Cellulose-1 (95:5 *n*-hexane: 2-propanol, 1 mL/min, 218 nm); tr (major) = 7.4, tr (minor) = 9.3 (93:7 e.r.)

**methyl 2-((S)-((R)-1-oxo-1,2,3,4-tetrahydronaphthalen-2-yl)(phenyl)methyl)acrylate (3i)**

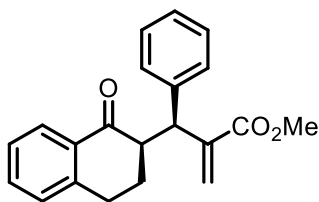

*3i* was prepared following the abovementioned procedure.

63% yield (40 mg, 0.13 mmol), yellow oil.  $^1\text{H}$  NMR (400 MHz,  $\text{CDCl}_3$ )  $\delta$  7.93 (1H, dd,  $J = 7.87, 1.19$  Hz), 7.41 (1H, td,  $J = 7.52, 1.48$  Hz), 7.31-7.24 (5H, m), 7.21-7.13 (2H, m), 6.29 (1H, s), 5.71 (1H, s), 4.44 (1H, d,  $J = 9.66$  Hz), 3.64 (3H, s), 3.28 (1H, td,  $J = 10.23, 4.04$  Hz), 2.98-2.87 (2H, m), 2.02-1.89 (1H, m), 1.74-1.60 (1H, m);  $^{13}\text{C}$  NMR (100 MHz,  $\text{CDCl}_3$ )  $\delta$  199.0, 167.4, 143.4, 143.0, 140.8, 133.3, 133.0, 128.9, 128.7, 128.6, 127.7, 126.9, 126.7, 123.8, 52.0, 50.8, 45.6, 28.3, 27.4. HRMS (ESI) Calculated for  $\text{C}_{21}\text{H}_{21}\text{O}_3^+$  ( $[\text{M}+\text{H}]^+$ ) 321.1485. Found 321.1493.  $[\alpha]_{\text{D}}^{25} = +51.3$  ( $c = 0.65$ ,  $\text{CHCl}_3$ ). HPLC Phenomenex Lux Cellulose-5 (90:10 *n*-hexane: 2-propanol, 1 mL/min, 218 nm); tr (major) = 24.1, tr (minor) = 29.1 (89:11 e.r.)

**methyl 2-((1-oxo-2,3-dihydro-1H-inden-2-yl)(phenyl)methyl)acrylate (3j)**

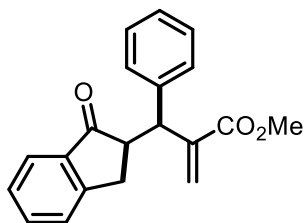

*3j* was prepared following the abovementioned procedure. This product has been characterized as a mixture of diastereoisomers (dr = 4:1).

38% yield (23 mg, 0.076 mmol), yellow oil.  $^1\text{H}$  NMR (500 MHz,  $\text{CDCl}_3$ ) (for major diastereomer)  $\delta$  7.71 (1H, d,  $J = 7.83$  Hz), 7.50 (1H, td,  $J = 7.51, 1.20$  Hz), 7.34-7.29 (2H, m), 7.26-7.20 (4H, m), 7.19-7.11 (1H, m), 6.42 (1H, s), 5.76 (1H, dd,  $J = 1.24, 0.69$  Hz), 4.48 (1H, dd,  $J = 7.41, 1.22$  Hz), 3.69 (3H, s), 3.47 (1H, td,  $J = 7.74, 4.21$  Hz), 3.24 (1H, dd,  $J = 17.23, 8.39$  Hz), 2.83 (1H, dd,  $J = 17.29, 4.19$  Hz), (for minor diastereomer)  $\delta$  7.72 (1H, d,  $J = 8.04$  Hz), 7.56 (1H, dd,  $J = 7.44, 1.29$  Hz), 7.42-7.38 (1H, m), 7.37-7.34 (1H, m), 7.29-7.20 (5H, m), 6.32 (1H, t,  $J = 0.71$  Hz), 5.48 (1H, dd,  $J = 1.45, 0.55$  Hz), 4.45 (1H, d,  $J = 7.03$  Hz), 3.61 (3H, s), 3.39 (1H, ddd,  $J = 8.04, 6.97, 4.34$  Hz), 3.26 (1H, dd,  $J = 17.23, 8.39$  Hz), 3.03 (1H, dd,  $J = 17.28, 4.38$  Hz);  $^{13}\text{C}$  NMR (100 MHz,  $\text{CDCl}_3$ ) (for major diastereomer)  $\delta$  206.7, 167.2, 153.4, 142.7, 140.1, 136.9, 134.8, 128.7, 128.5, 127.5, 127.0, 126.5, 124.1, 52.1, 50.1, 48.0, 31.6, (for minor diastereomer)  $\delta$  206.0, 167.3, 152.8, 141.5, 140.7, 137.3, 134.8, 128.6, 128.6, 127.6, 126.6, 126.1, 125.6, 52.1, 50.5, 48.0, 31.6. HRMS (ESI) Calculated for  $\text{C}_{20}\text{H}_{19}\text{O}_3^+$  ( $[\text{M}+\text{H}]^+$ ) 307.1329. Found 307.1332.  $[\alpha]_{\text{D}}^{25} = +85.0$  ( $c = 0.010$ ,  $\text{CHCl}_3$ ). HPLC (for major diastereomer) Phenomenex Lux Amylose-2 (80:20 *n*-hexane: 2-propanol, 1 mL/min, 218 nm); tr (minor) = 32.1, tr (major) = 37.0 (93:7 e.r.).

**methyl 2-((S)-((S)-2-oxo-1,2,3,4-tetrahydronaphthalen-1-yl)(phenyl)methyl)acrylate (3k)**

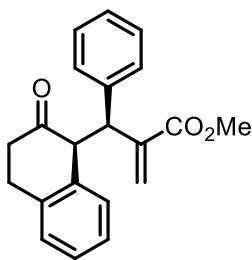

*3k* was prepared following the abovementioned procedure.

48% global yield (31 mg, 0.10 mmol) of 5:1 diastereomer mixture. Pure samples of each diastereomer were obtained upon careful chromatographic purification.

**major diastereomer**, yellow oil.  $^1\text{H}$  NMR (400 MHz,  $\text{CDCl}_3$ )  $\delta$  7.18-7.12 (4H, m), 7.12-7.07 (1H, m), 6.98-6.91 (2H, m), 6.90-6.83 (1H, m), 6.48 (1H, s), 6.45-6.41 (1H, d,  $J = 7.58$  Hz) 5.99 (1H, d,  $J = 1.1$  Hz), 4.57 (1H, d,  $J = 10.78$  Hz), 4.17 (1H, d,  $J = 10.78$  Hz), 3.73 (3H, s), 3.44-3.30 (1H, m), 3.01-2.90 (1H, m), 2.75-2.66 (1H, m), 2.51-2.40 (1H, m);  $^{13}\text{C}$  NMR (100 MHz,  $\text{CDCl}_3$ )  $\delta$  211.1, 167.5, 140.2, 138.9, 136.9, 135.4, 130.2, 129.1, 128.3, 127.8, 127.3, 127.2, 126.3, 59.9, 52.3, 48.0, 37.0, 29.8, 27.8. **HRMS (ESI)** Calculated for  $\text{C}_{21}\text{H}_{21}\text{O}_3^+$  ( $[\text{M}+\text{H}]^+$ ) 321.1485. Found 321.1486. **HPLC** Phenomenex Lux Cellulose-1 (90:10 *n*-hexane: 2-propanol, 1 mL/min, 218 nm); tr (major) = 10.8, tr (minor) = 17.4 (91:9 e.r.).

**methyl 2-((S)-((R)-2-oxo-1,2,3,4-tetrahydronaphthalen-1-yl)(phenyl)methyl)acrylate (3k')**

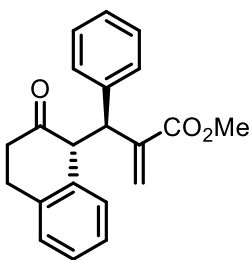

*3k'* was prepared following the abovementioned procedure.

48% global yield (31 mg, 0.10 mmol) of 5:1 diastereomerr mixture. Pure samples of each diastereomer were obtained upon careful chromatographic purification.

**minor diastereomer**, yellow oil.  $^1\text{H}$  NMR (400 MHz,  $\text{CDCl}_3$ )  $\delta$  7.31-7.27 (1H, m), 7.26-7.22 (3H, m), 7.21-7.17 (2H, m), 7.17-7.12 (2H, m), 7.11-7.07 (1H, m) 6.32 (1H, s), 5.83 (1H, s), 4.62 (1H, d,  $J = 9.37$  Hz), 4.17 (1H, d,  $J = 9.37$  Hz), 3.55 (3H, s), 3.22-3.10 (1H, m), 2.91-2.82 (1H, m), 2.55-2.46 (1H, m), 2.44-2.33 (1H, m);  $^{13}\text{C}$  NMR (100 MHz,  $\text{CDCl}_3$ )  $\delta$  210.6, 167.2, 141.6, 139.2, 137.3, 136.0, 130.0, 129.0, 128.6, 128.1, 127.5, 126.8, 126.7, 58.8, 52.0, 48.9, 37.0, 27.6. **HRMS (ESI)** Calculated for  $\text{C}_{21}\text{H}_{21}\text{O}_3^+$  ( $[\text{M}+\text{H}]^+$ ) 321.1485. Found 321.1486. **HPLC** Phenomenex Lux Cellulose-1 (90:10 *n*-hexane: 2-propanol, 1 mL/min, 218 nm); tr (major) = 9.2, tr (minor) = 13.4 (92:8 e.r.)

### methyl 4-benzoyl-2-methylene-3-phenylhexanoate (**3l**)

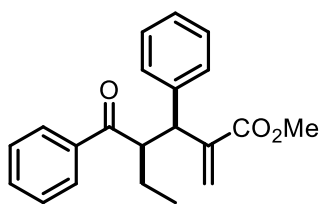

**3l** was prepared following the abovementioned procedure. This product has been characterized as a mixture of diastereoisomers (dr = 2:1).

66% yield (43 mg, 0.13 mmol) (dr = 2:1), yellow oil. **<sup>1</sup>H NMR** (500 MHz, CDCl<sub>3</sub>) (for major diastereomer)  $\delta$  7.82-7.77 (2H, m), 7.52-7.48 (1H, m), 7.38-7.34 (3H, m), 7.25-7.21 (2H, m), 7.10-7.04 (2H, m), 6.36 (1H, d,  $J$  = 0.88 Hz), 5.89 (1H, s), 4.50-4.41 (1H, m), 4.35 (1H, d,  $J$  = 11.30 Hz), 3.71 (3H, s), 1.83-1.75 (2H, m), 0.83 (3H, t,  $J$  = 7.50 Hz), (for minor diastereomer)  $\delta$  8.07-8.02 (2H, m), 7.60-7.56 (1H, m), 7.48-7.44 (2H, m), 7.34-7.29 (3H, m), 7.02-6.96 (2H, m), 6.06 (1H, s), 5.62 (1H, s), 4.44 (1H, d,  $J$  = 11.74 Hz), 4.27-4.20 (1H, m), 3.60 (3H, s), 1.56-1.49 (2H, m), 0.71 (3H, t,  $J$  = 7.55 Hz); **<sup>13</sup>C NMR** (126 MHz, CDCl<sub>3</sub>) (for major diastereomer)  $\delta$  203.6, 167.2, 141.7, 140.9, 138.6, 132.8, 128.6, 128.5, 128.2, 128.1, 126.6, 126.2, 52.0, 50.0, 49.3, 25.0, 11.3, (for minor diastereomer)  $\delta$  203.0, 166.9, 142.9, 140.7, 138.0, 133.2, 129.0, 128.9, 128.6, 128.4, 127.0, 124.0, 51.9, 49.8, 48.2, 24.7, 10.9. **HRMS (ESI)** Calculated for C<sub>21</sub>H<sub>23</sub>O<sub>3</sub><sup>+</sup> ([M+H]<sup>+</sup>) 323.1642. Found 323.1642. **HPLC** Phenomenex Lux Cellulose-1 (99:1 *n*-hexane: 2-propanol, 1 mL/min, 218 nm); (for major diastereomer) tr (major) = 11.4, tr (minor) = 17.5, (63:37 e.r.); (for minor diastereomer) tr = 9.1, 16.6, (50:50 e.r.).

### methyl 2-methylene-5-oxo-3,4,5-triphenylpentanoate (**3m**)

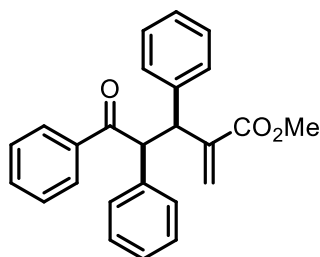

**3m** was prepared following the abovementioned procedure. This product has been characterized as a mixture of diastereoisomers (dr = 1.3:1).

78% yield (58 mg, 0.16 mmol) (dr = 2:1), colourless solid. **<sup>1</sup>H NMR** (400 MHz, CDCl<sub>3</sub>) (for major diastereomer)  $\delta$  8.04-7.98 (2H, m), 7.44-7.38 (5H, m), 7.23-7.16 (3H, m), 7.10-7.08 (5H, m), 6.26 (1H, s), 5.69 (1H, s), 5.20 (1H, d,  $J$  = 11.80 Hz), 4.84 (1H, d,  $J$  = 11.75 Hz) 3.65 (3H, s), (for minor diastereomer)  $\delta$  7.96-7.90 (2H, m), 7.52-7.44 (2H, m), 7.38-7.32 (2H, m), 7.30-7.24 (3H, m), 7.15-7.10 (3H, m), 7.04-6.99 (3H, m), 6.02 (1H, s), 5.77 (1H, d,  $J$  = 11.68 Hz) 5.59 (1H, s), 4.95 (1H, d,  $J$  = 11.76 Hz), 3.58 (3H, s); **<sup>13</sup>C NMR** (100 MHz, CDCl<sub>3</sub>) (for major diastereomer)  $\delta$  198.4, 166.9, 142.9, 139.8, 137.0, 136.7, 133.2, 129.0, 128.8, 128.8, 128.6, 128.6, 128.0, 127.3, 126.6, 123.4, 58.0, 52.1, 50.5, (for minor diastereomer)  $\delta$  198.5, 166.9, 141.4, 141.0, 137.1, 137.1, 133.0, 129.2, 128.9, 128.6, 128.6, 128.5, 128.3, 127.4, 127.4, 126.7, 55.5, 51.8, 51.5. **HRMS (ESI)** Calculated for C<sub>25</sub>H<sub>23</sub>O<sub>3</sub><sup>+</sup> ([M+H]<sup>+</sup>) 371.1642. Found 371.1643. **HPLC** Phenomenex Lux Cellulose-5 (98:2 *n*-hexane: 2-propanol, 1 mL/min, 218 nm); (for minor diastereomer) tr (minor) = 19.5, tr (major) = 55.3, (86:14 e.r.); (for major diastereomer) tr (major) = 22.9, tr (minor) = 29.7 (68:32 e.r.).

**methyl (S)-2-methylene-5-oxo-3,5-diphenylpentanoate (3n)**

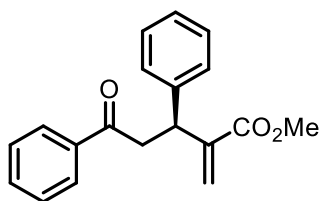

*3n* was prepared following the abovementioned procedure.

76% yield (44 mg, 0.15 mmol), colourless solid.  $^1\text{H}$  NMR (400 MHz,  $\text{CDCl}_3$ )  $\delta$  8.00-7.88 (2H, m), 7.60-7.51 (1H, m), 7.50-7.40 (2H, m), 7.33-7.25 (4H, m), 7.24-7.15 (1H, m), 6.31 (1H, s), 5.62 (1H, s), 4.69 (1H, t,  $J = 7.37$  Hz), 3.69 (3H, s), 3.56 (2H, qd,  $J = 17.17, 7.56$  Hz);  $^{13}\text{C}$  NMR (100 MHz,  $\text{CDCl}_3$ )  $\delta$  197.7, 167.1, 142.9, 141.9, 137.0, 133.3, 128.7, 128.6, 128.2, 128.0, 126.8, 124.9, 52.1, 43.5, 42.2. **HRMS (ESI)** Calculated for  $\text{C}_{19}\text{H}_{19}\text{O}_3^+$  ( $[\text{M}+\text{H}]^+$ ) 295.1329. Found 295.1328.  $[\alpha]_{\text{D}}^{25} = +50.7$  ( $c = 1.82$ ,  $\text{CHCl}_3$ ). **HPLC** Phenomenex Lux Cellulose-1 (99:1 *n*-hexane: 2-propanol, 1 mL/min, 218 nm); tr (major) = 30.1, tr (minor) = 43.0 (91:9 e.r.).

**methyl (S)-5-(4-methoxyphenyl)-2-methylene-5-oxo-3-phenylpentanoate (3o)**

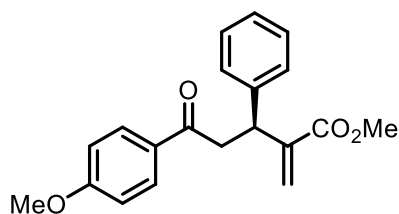

*3o* was prepared following the abovementioned procedure.

70% yield (46 mg, 0.14 mmol), colourless solid.  $^1\text{H}$  NMR (400 MHz,  $\text{CDCl}_3$ )  $\delta$  7.92 (2H, d,  $J = 8.95$  Hz), 7.30-7.24 (4H, m), 7.21-7.15 (1H, m), 6.90 (2H, d,  $J = 8.95$  Hz), 6.29 (1H, s), 5.60 (1H, s), 4.66 (1H, t,  $J = 7.38$  Hz), 3.85 (3H, s), 3.68 (3H, s), 3.49 (2H, qd,  $J = 16.98, 7.09$  Hz);  $^{13}\text{C}$  NMR (100 MHz,  $\text{CDCl}_3$ )  $\delta$  196.3, 167.2, 163.7, 143.0, 142.1, 130.5, 130.1, 128.6, 128.1, 126.8, 124.8, 113.9, 55.6, 52.1, 43.2, 42.3. **HRMS (ESI)** Calculated for  $\text{C}_{20}\text{H}_{21}\text{O}_4^+$  ( $[\text{M}+\text{H}]^+$ ) 325.1434. Found 325.1446.  $[\alpha]_{\text{D}}^{25} = +42.9$  ( $c = 2.07$ ,  $\text{CHCl}_3$ ). **HPLC** Phenomenex Lux Amylose-2 (80:20 *n*-hexane: 2-propanol, 1 mL/min, 218 nm); tr (minor) = 41.1, tr (major) = 45.0 (93:7 e.r.).

**methyl (S)-5-([1,1'-biphenyl]-4-yl)-2-methylene-5-oxo-3-phenylpentanoate (3p)**

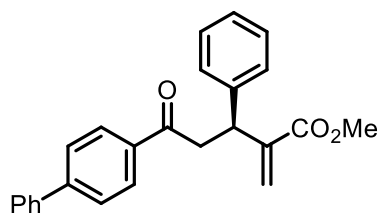

*3p* was prepared following the abovementioned procedure.

62% yield (46 mg, 0.12 mmol), colourless solid.  $^1\text{H}$  NMR (400 MHz,  $\text{CDCl}_3$ )  $\delta$  8.02 (2H, d,  $J = 8.00$  Hz), 7.67 (2H, d,  $J = 8.00$  Hz), 7.64-7.59 (2H, m), 7.50-7.44 (2H, m), 7.43-7.37 (1H, m), 7.33-7.27 (4H, m), 7.24-7.16 (1H, m), 6.33 (1H, s), 5.64 (1H, s), 4.71 (1H, t,  $J = 7.39$  Hz), 3.70 (3H, s), 3.59 (2H, qd,  $J = 17.01, 7.10$  Hz);  $^{13}\text{C}$  NMR (100 MHz,  $\text{CDCl}_3$ )  $\delta$  197.3, 167.1, 146.0, 142.9, 141.9, 140.0, 135.7, 129.1, 128.8, 128.7, 128.4, 128.1, 127.4, 126.9, 124.9, 52.1, 43.6, 42.3. **HRMS (ESI)** Calculated for  $\text{C}_{25}\text{H}_{23}\text{O}_3^+$  ( $[\text{M}+\text{H}]^+$ ) 371.1642. Found 371.1649.  $[\alpha]_{\text{D}}^{25} = +38.6$  ( $c = 1.85$ ,  $\text{CHCl}_3$ ). **HPLC** Phenomenex Lux Amylose-2 (80:20 *n*-hexane: 2-propanol, 1 mL/min, 218 nm); tr (minor) = 44.0, tr (major) = 47.6 (92:8 e.r.).

**methyl 2-((S)-(4-fluorophenyl)((R)-2-oxocyclohexyl)methyl)acrylate (3q)**

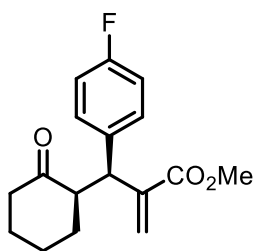

**3q** was prepared following the abovementioned procedure.

70% yield (41 mg, 0.14 mmol), colourless solid.  $^1\text{H}$  NMR (500 MHz,  $\text{CDCl}_3$ )  $\delta$  7.17 (2H, dd,  $J_{\text{HH}} = 8.73$  Hz,  $^4J_{\text{HF}} = 5.37$  Hz), 6.96 (2H, t,  $^3J_{\text{HF}} = 8.72$  Hz,  $J_{\text{HH}} = 8.69$  Hz), 6.22 (1H, s), 5.58 (1H, s), 4.21 (1H, d,  $J = 11.20$  Hz), 3.68 (3H, s), 3.03 (1H, td,  $J = 11.10, 4.95$  Hz), 2.49-2.40 (1H, m), 2.39-2.30 (1H, m), 2.09-1.99 (1H, m), 1.86-1.77 (2H, m), 1.77-1.64 (1H, m), 1.63-1.59 (1H, m), 0.93-0.78 (1H, m);  $^{13}\text{C}$  NMR (126 MHz,  $\text{CDCl}_3$ )  $\delta$  211.9, 167.2, 161.8 (d,  $^1J_{\text{CF}} = 245.43$  Hz), 143.2, 136.4 (d,  $^4J_{\text{CF}} = 3.24$  Hz), 130.1 (d,  $^3J_{\text{CF}} = 7.93$  Hz), 122.9, 115.4 (d,  $^2J_{\text{CF}} = 21.21$  Hz), 54.8, 52.1, 45.0, 42.6, 33.4, 29.1, 24.8;  $^{19}\text{F}$  NMR (471 MHz,  $\text{CDCl}_3$ )  $\delta$  -116.24 (s). **HRMS (ESI)** Calculated for  $\text{C}_{17}\text{H}_{20}\text{FO}_3^+$  ( $[\text{M}+\text{H}]^+$ ) 291.1391. Found 291.1388.  $[\alpha]_{\text{D}}^{25} = +139.9$  ( $c = 1.03$ ,  $\text{CHCl}_3$ ). **HPLC** Phenomenex Lux Cellulose-5 (95:5 *n*-hexane: 2-propanol, 1 mL/min, 218 nm); tr (minor) = 37.8, tr (major) = 42.6 (93:7 e.r.).

**methyl 2-((S)-(4-chlorophenyl)((R)-2-oxocyclohexyl)methyl)acrylate (3r)**

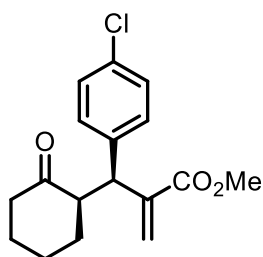

**3r** was prepared following the abovementioned procedure.

56% yield (34 mg, 0.11 mmol), orange solid.  $^1\text{H}$  NMR (400 MHz,  $\text{CDCl}_3$ )  $\delta$  7.24 (2H, d,  $J = 8.50$  Hz), 7.14 (2H, d,  $J = 8.49$  Hz), 6.22 (1H, s), 5.58 (1H, s), 4.20 (1H, d,  $J = 11.12$  Hz), 3.68 (3H, s), 3.04 (1H, td,  $J = 11.13, 4.94$  Hz), 2.49-2.39 (1H, m), 2.39-2.30 (1H, m), 2.11-1.97 (1H, m), 1.85-1.64 (3H, m), 1.62-1.51 (1H, m), 0.95-0.76 (1H, m);  $^{13}\text{C}$  NMR (100 MHz,  $\text{CDCl}_3$ )  $\delta$  211.7, 167.1, 142.9, 139.3, 132.6, 130.1, 128.8, 123.1, 54.6, 52.1, 45.2, 42.6, 33.4, 29.1, 24.9. **HRMS (ESI)** Calculated for  $\text{C}_{17}\text{H}_{20}\text{ClO}_3^+$  ( $[\text{M}+\text{H}]^+$ ) 307.1095. Found 307.1099.  $[\alpha]_{\text{D}}^{25} = +153.6$  ( $c = 0.72$ ,  $\text{CHCl}_3$ ). **HPLC** Phenomenex Lux Cellulose-5 (90:10 *n*-Hexane: 2-Propanol, 1 mL/min, 218 nm); tr (minor) = 21.1, tr (major) = 24.8 (93:7 e.r.).

**methyl 2-((S)-((R)-2-oxocyclohexyl)(4-(trifluoromethyl)phenyl)methyl)acrylate (3s)**

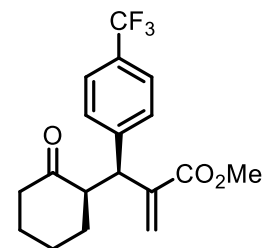

**3s** was prepared following the abovementioned procedure.

50% yield (34 mg, 0.10 mmol), pale red solid.  $^1\text{H}$  NMR (500 MHz,  $\text{CDCl}_3$ )  $\delta$  7.53 (2H, d,  $J = 8.12$  Hz), 7.34 (2H, d,  $J = 8.12$  Hz), 6.26 (1H, s), 5.63 (1H, s), 4.29 (1H, d,  $J = 11.10$  Hz), 3.68 (3H, s), 3.10 (1H, td,  $J = 11.16, 4.93$  Hz), 2.48-2.41 (1H, m), 2.40-2.32 (1H, m), 2.10-2.01 (1H, m), 1.85-1.77 (1H, m), 1.76-1.68 (1H, m), 1.68-1.62 (2H, m), 1.62-1.54 (1H, m);  $^{13}\text{C}$  NMR (126 MHz,  $\text{CDCl}_3$ )  $\delta$  211.4, 167.0, 145.1, 142.6, 129.2 (q,  $^2J_{\text{CF}} = 32.41$  Hz), 129.1, 125.6 (q,  $^3J_{\text{CF}} = 3.69$  Hz), 124.3 (q,  $^1J_{\text{CF}} = 272.14$  Hz), 123.4, 54.5, 52.2, 45.7, 42.7, 33.4, 29.1, 24.9;  $^{19}\text{F}$  NMR (471 MHz,  $\text{CDCl}_3$ )  $\delta$  -62.46 (s). **HRMS (ESI)** Calculated for  $\text{C}_{18}\text{H}_{20}\text{F}_3\text{O}_3^+$  ( $[\text{M}+\text{H}]^+$ ) 341.1359. Found 341.1358.  $[\alpha]_{\text{D}}^{25} = +112.3$  ( $c = 0.97$ ,  $\text{CHCl}_3$ ). **HPLC** Phenomenex Lux Cellulose-5 (98:2 *n*-hexane: 2-propanol, 1 mL/min, 218 nm); tr (minor) = 29.1, tr (major) = 49.7 (86:14 e.r.).

**methyl 2-((S)-(4-cyanophenyl)((R)-2-oxocyclohexyl)methyl)acrylate (3t)**

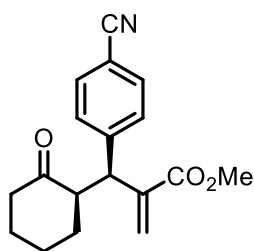

*3t* was prepared following the abovementioned procedure.

52% yield (30 mg, 0.10 mmol), orange oil.  $^1\text{H NMR}$  (400 MHz,  $\text{CDCl}_3$ )  $\delta$  7.57 (2H, d,  $J = 8.43$  Hz), 7.34 (2H, d,  $J = 8.32$  Hz), 6.28 (1H, s), 5.62 (1H, s), 4.28 (1H, d,  $J = 10.97$  Hz), 3.68 (3H, s), 3.08 (1H, td,  $J = 11.15$ , 4.1 Hz), 2.48-2.31 (2H, m), 2.13-2.01 (1H, m), 1.86-1.76 (1H, m), 1.76-1.60 (3H, m), 0.9-0.8 (1H, m);  $^{13}\text{C NMR}$  (100 MHz,  $\text{CDCl}_3$ )  $\delta$  211.0, 166.9, 146.6, 142.2, 132.4, 129.6, 123.7, 118.9, 110.8, 54.2, 52.2, 46.0, 42.7, 33.4, 29.0, 25.0. **HRMS (ESI)** Calculated for  $\text{C}_{18}\text{H}_{20}\text{NO}_3^+$  ( $[\text{M}+\text{H}]^+$ ) 298.1438. Found 298.1430.  $[\alpha]_{\text{D}}^{25} = +190.9$  ( $c = 1.20$ ,  $\text{CHCl}_3$ ). **HPLC** Phenomenex Lux Cellulose-5 (80:20 *n*-hexane: 2-propanol, 1 mL/min, 218 nm); tr (minor) = 29.1, tr (major) = 36.8 (91:9 e.r.)

**methyl 4-((S)-2-(methoxycarbonyl)-1-((R)-2-oxocyclohexyl)allyl)benzoate (3u)**

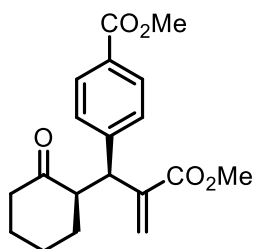

*3u* was prepared following the abovementioned procedure.

73% yield (48 mg, 0.15 mmol), orange oil.  $^1\text{H NMR}$  (400 MHz,  $\text{CDCl}_3$ )  $\delta$  7.94 (2H, d,  $J = 8.39$  Hz), 7.28 (2H, d,  $J = 8.35$  Hz), 6.25 (1H, s), 5.62 (1H, s), 4.28 (1H, d,  $J = 11.11$  Hz), 3.88 (3H, s), 3.67 (3H, s), 3.09 (1H, td,  $J = 11.16$ , 4.80 Hz), 2.48-2.40 (1H, m), 2.40-2.30 (1H, m), 2.09-1.98 (1H, m), 1.83-1.74 (1H, m), 1.74-1.64 (2H, m), 1.63-1.51 (2H, m);  $^{13}\text{C NMR}$  (100 MHz,  $\text{CDCl}_3$ )  $\delta$  211.5, 167.1, 167.0, 146.3, 142.6, 129.9, 128.8, 128.8, 123.4, 54.5, 52.2, 52.1, 45.8, 42.7, 33.4, 29.1, 24.9. **HRMS (ESI)** Calculated for  $\text{C}_{19}\text{H}_{23}\text{O}_5^+$  ( $[\text{M}+\text{H}]^+$ ) 331.154. Found 331.1538.  $[\alpha]_{\text{D}}^{25} = +112.3$  ( $c = 1.71$ ,  $\text{CHCl}_3$ ). **HPLC** Phenomenex Lux Cellulose-1 (90:10 *n*-hexane: 2-propanol, 1 mL/min, 218 nm); tr (minor) = 11.6, tr (major) = 17.6 (91:9 e.r.).

**methyl 2-((S)-(4-methoxyphenyl)((R)-2-oxocyclohexyl)methyl)acrylate (3v)**

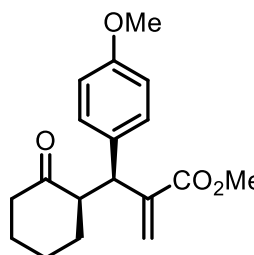

*3v* was prepared following the abovementioned procedure.

34% yield (21 mg, 0.07 mmol), yellow solid.  $^1\text{H NMR}$  (500 MHz,  $\text{CDCl}_3$ )  $\delta$  7.12 (2H, d,  $J = 8.69$  Hz), 6.81 (2H, d,  $J = 8.69$  Hz), 6.19 (1H, s), 5.58 (1H, s), 4.17 (1H, d,  $J = 11.28$  Hz), 3.77 (3H, s), 3.68 (3H, s), 3.03 (1H, td,  $J = 11.02$ , 4.95 Hz), 2.47-2.39 (1H, m), 2.68-2.30 (1H, m), 2.06-1.97 (1H, m), 1.85-1.76 (1H, m), 1.76-1.66 (2H, m), 1.59-1.52 (1H, m), 0.91-0.80 (1H, m);  $^{13}\text{C NMR}$  (126 MHz,  $\text{CDCl}_3$ )  $\delta$  212.4, 167.4, 158.5, 143.5, 132.7, 129.6, 122.6, 114.0, 55.3, 55.0, 52.0, 44.9, 42.5, 33.4, 29.2, 24.7. **HRMS (ESI)** Calculated for  $\text{C}_{18}\text{H}_{23}\text{O}_4^+$  ( $[\text{M}+\text{H}]^+$ ) 303.1591. Found 303.159.  $[\alpha]_{\text{D}}^{25} = +125.0$  ( $c = 1.15$ ,  $\text{CHCl}_3$ ). **HPLC** Phenomenex Lux Cellulose-5 (90:10 *n*-hexane: 2-propanol, 1 mL/min, 218 nm); tr (major) = 54.1, tr (minor) = 70.4 (92:8 e.r.).

**methyl 2-((S)-(4-bromophenyl)((R)-2-oxocyclohexyl)methyl)acrylate (3w)**

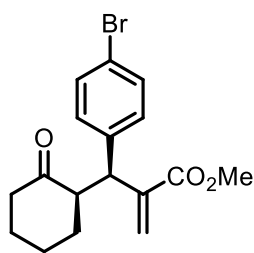

*3w* was prepared following the abovementioned procedure.

68% yield (48 mg, 0.14 mmol), orange solid. **<sup>1</sup>H NMR** (400 MHz, CDCl<sub>3</sub>)  $\delta$  7.39 (2H, d,  $J$  = 8.41 Hz), 7.09 (2H, d,  $J$  = 8.41 Hz), 6.22 (1H, s), 5.58 (1H, s), 4.18 (1H, d,  $J$  = 11.10 Hz), 3.68 (3H, s), 3.03 (1H, td,  $J$  = 11.13, 4.94 Hz), 2.47-2.39 (1H, m), 2.39-2.29 (1H, m), 2.08-1.99 (1H, m), 1.85-1.74 (1H, m), 1.74-1.64 (2H, m), 1.62-1.52 (1H, m), 0.91-0.81 (1H, m); **<sup>13</sup>C NMR** (100 MHz, CDCl<sub>3</sub>)  $\delta$  211.7, 167.1, 142.8, 139.9, 131.7, 130.4, 123.1, 120.7, 54.5, 52.1, 45.3, 42.6, 33.4, 29.1, 24.9. **HRMS (ESI)** Calculated for C<sub>17</sub>H<sub>20</sub>BrO<sub>3</sub><sup>+</sup> ([M+H]<sup>+</sup>) 351.059. Found 351.059.  $[\alpha]_D^{25}$  = +119.1 ( $c$  = 1.34, CHCl<sub>3</sub>). **HPLC** Phenomenex Lux Cellulose-5 (90:10 *n*-hexane: 2-propanol, 1 mL/min, 218 nm); tr (minor) = 19.9, tr (major) = 24.2 (93:7 e.r.)

**methyl 2-((S)-((R)-2-oxocyclohexyl)(p-tolyl)methyl)acrylate (3x)**

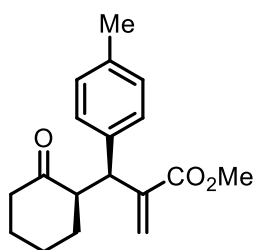

*3x* was prepared following the abovementioned procedure.

75% yield (43 mg, 0.15 mmol), pale red solid. **<sup>1</sup>H NMR** (400 MHz, CDCl<sub>3</sub>)  $\delta$  7.13-7.05 (4H, m), 6.20 (1H, s), 5.59 (1H, s), 4.18 (1H, d,  $J$  = 11.36 Hz), 3.68 (3H, s), 3.06 (1H, td,  $J$  = 11.03, 4.93 Hz), 2.48-2.39 (1H, m), 2.39-2.31 (1H, m), 2.30 (3H, s), 2.07-1.97 (1H, m), 1.85-1.76 (1H, m), 1.76-1.65 (3H, m), 1.63-1.53 (1H, m); **<sup>13</sup>C NMR** (100 MHz, CDCl<sub>3</sub>)  $\delta$  212.4, 167.4, 143.4, 137.7, 136.4, 129.3, 128.5, 122.8, 54.9, 52.0, 45.3, 42.6, 33.4, 29.2, 24.7, 21.2. **HRMS (ESI)** Calculated for C<sub>18</sub>H<sub>23</sub>O<sub>3</sub><sup>+</sup> ([M+H]<sup>+</sup>) 287.1642. Found 287.1643.  $[\alpha]_D^{25}$  = +118.1 ( $c$  = 0.98, CHCl<sub>3</sub>). **HPLC** Phenomenex Lux Amylose-2 (90:10 *n*-hexane: 2-propanol, 1 mL/min, 218 nm); tr (minor) = 15.4, tr (major) = 23.7 (88:12 e.r.)

**methyl 2-((S)-((R)-2-oxocyclohexyl)(m-tolyl)methyl)acrylate (3y)**

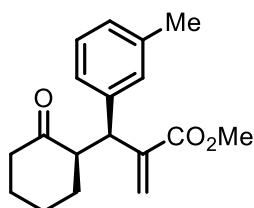

*3y* was prepared following the abovementioned procedure.

43% yield (17 mg, 0.06 mmol), yellow solid. **<sup>1</sup>H NMR** (500 MHz, CDCl<sub>3</sub>)  $\delta$  7.18-7.13 (1H, m), 7.06-6.96 (3H, m), 6.21 (1H, s), 5.60 (1H, s), 4.18 (1H, d,  $J$  = 11.35 Hz), 3.68 (3H, s), 3.07 (1H, td,  $J$  = 11.05, 4.99 Hz), 2.47-2.40 (1H, m), 2.39-2.32 (1H, m), 2.31 (3H, s), 2.07-1.98 (1H, m), 1.85-1.76 (1H, m), 1.75-1.64 (2H, m), 1.63-1.53 (1H, m), 1.34-1.27 (1H, m); **<sup>13</sup>C NMR** (100 MHz, CDCl<sub>3</sub>)  $\delta$  212.3, 167.3, 143.3, 140.6, 138.1, 129.4, 128.4, 127.6, 125.7, 122.8, 55.0, 52.0, 45.6, 42.6, 33.4, 29.2, 24.7, 21.6. **HRMS (ESI)** Calculated for C<sub>18</sub>H<sub>23</sub>O<sub>3</sub><sup>+</sup> ([M+H]<sup>+</sup>) 287.1642. Found 287.1644.  $[\alpha]_D^{25}$  = +144.0 ( $c$  = 1.28, CHCl<sub>3</sub>). **HPLC** Phenomenex Lux Cellulose-5 (80:20 *n*-hexane: 2-propanol, 1 mL/min, 218 nm); tr (major) = 15.7, tr (minor) = 27.4 (94:6 e.r.)

**methyl 2-((S)-((R)-2-oxocyclohexyl)(o-tolyl)methyl)acrylate (3z)**

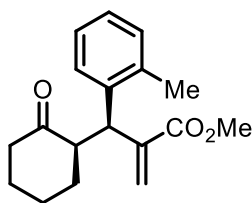

*3z* was prepared following the abovementioned procedure.

60% yield (34 mg, 0.12 mmol), orange solid. <sup>1</sup>H NMR (500 MHz, CDCl<sub>3</sub>) δ 7.15-7.05 (4H, m), 6.24 (1H, s), 5.53 (1H, s), 4.52 (1H, d, *J* = 11.33 Hz), 3.66 (3H, s), 3.03 (1H, td, *J* = 11.45, 4.82 Hz), 2.46 (3H, s), 2.45-2.41 (1H, m), 2.41-2.33 (1H, m), 2.10-2.02 (1H, m), 1.80-1.73 (1H, m), 1.73-1.66 (1H, m), 1.66-1.58 (1H, m), 1.58-1.50 (1H, m), 1.37-1.27 (1H, m); <sup>13</sup>C NMR (126 MHz, CDCl<sub>3</sub>) δ 212.2, 167.4, 143.5, 139.1, 137.5, 130.6, 127.1, 126.4, 126.2, 122.9, 56.0, 52.0, 43.0, 40.3, 32.8, 29.4, 25.5, 20.3. HRMS (ESI) Calculated for C<sub>18</sub>H<sub>23</sub>O<sub>3</sub><sup>+</sup> ([M+H]<sup>+</sup>) 287.1642. Found 287.164. [α]<sub>D</sub><sup>25</sup> = +114.8 (c = 1.50, CHCl<sub>3</sub>). HPLC Phenomenex Lux Cellulose-1 (99:1 *n*-hexane: 2-propanol, 1 mL/min, 218 nm); tr (minor) = 21.9, tr (major) = 31.2 (96:4 e.r.)

**methyl 2-((S)-naphthalen-2-yl((R)-2-oxocyclohexyl)methyl)acrylate (3aa)**

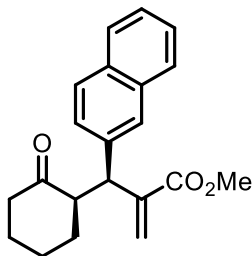

*3aa* was prepared following the abovementioned procedure.

40% yield (26 mg, 0.08 mmol), yellow solid. <sup>1</sup>H NMR (500 MHz, CDCl<sub>3</sub>) δ 7.82-7.74 (3H, m), 7.67 (1H, s), 7.48-7.40 (2H, m), 5.48 (1H, dd, *J* = 8.46, 1.80 Hz), 6.27 (1H, s), 5.69 (1H, s), 4.41 (1H, d, *J* = 11.25 Hz), 3.67 (3H, s), 3.18 (1H, td, *J* = 11.07, 5.00 Hz), 2.51-2.44 (1H, m), 2.42-2.34 (1H, m), 2.09-1.99 (1H, m), 1.84-1.65 (3H, m), 1.63-1.56 (1H, m), 1.38-1.28 (1H, m); <sup>13</sup>C NMR (126 MHz, CDCl<sub>3</sub>) δ 212.2, 167.3, 143.1, 138.2, 133.6, 132.6, 128.3, 127.9, 127.7, 127.7, 126.6, 126.2, 125.8, 123.0, 54.8, 52.1, 45.9, 42.7, 33.5, 29.2, 24.8. HRMS (ESI) Calculated for C<sub>21</sub>H<sub>23</sub>O<sub>3</sub><sup>+</sup> ([M+H]<sup>+</sup>) 323.1642. Found 323.1642. [α]<sub>D</sub><sup>25</sup> = +158.4 (c = 1.48, CHCl<sub>3</sub>). HPLC Phenomenex Lux Cellulose-1 (95:5 *n*-hexane: 2-propanol, 1 mL/min, 218 nm); tr (minor) = 13.7, tr (major) = 23.0 (91:9 e.r.)

**methyl 2-((S)-naphthalen-1-yl((R)-2-oxocyclohexyl)methyl)acrylate (3ab)**

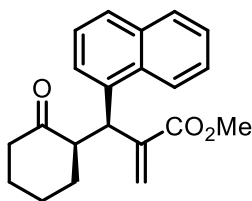

*3ab* was prepared following the abovementioned procedure.

44% yield (28 mg, 0.09 mmol), yellow solid. <sup>1</sup>H NMR (500 MHz, CDCl<sub>3</sub>) δ 8.42 (1H, d, *J* = 8.51 Hz), 7.84 (1H, d, *J* = 8.09 Hz), 7.72 (1H, d, *J* = 8.16 Hz), 7.55 (1H, t, *J* = 7.80 Hz), 7.47 (1H, t, *J* = 7.45 Hz), 7.42 (1H, t, *J* = 7.69 Hz), 7.35-7.31 (1H, m), 6.3 (1H, s), 5.63 (1H, s), 5.20 (1H, d, *J* = 10.96 Hz), 3.59 (3H, s), 3.24-3.11 (1H, m), 2.54-2.48 (1H, m), 2.42 (1H, td, *J* = 12.33, 5.80 Hz), 1.76-1.66 (2H, m), 1.52-1.44 (2H, m), 1.35-1.28 (2H, m); <sup>13</sup>C NMR (126 MHz, CDCl<sub>3</sub>) δ 212.4, 167.5, 134.0, 132.8, 128.9, 127.4, 126.2, 125.7, 125.5, 124.1, 123.3, 52.0, 42.9, 33.4, 29.8, 29.3, 25.3. HRMS (ESI) Calculated for C<sub>21</sub>H<sub>23</sub>O<sub>3</sub><sup>+</sup> ([M+H]<sup>+</sup>) 323.1642. Found 323.1644. [α]<sub>D</sub><sup>25</sup> = +126.9 (c = 0.41, CHCl<sub>3</sub>). HPLC Phenomenex Lux Cellulose-2 (99:1 *n*-hexane: 2-propanol, 1 mL/min, 218 nm); tr (major) = 87.2, tr (minor) = 95.7 (83:17 e.r.)

**methyl 2-((R)-((R)-2-oxocyclohexyl)(pyridin-2-yl)methyl)acrylate (3ac)**

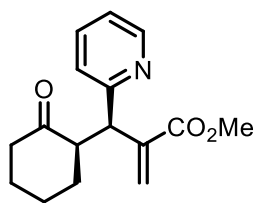

*3ac* was prepared following the abovementioned procedure.

48% yield (26 mg, 0.10 mmol), brown solid. **<sup>1</sup>H NMR** (400 MHz, CDCl<sub>3</sub>)  $\delta$  8.54 (1H, ddd,  $J$  = 4.81, 1.91, 0.90 Hz), 7.55 (1H, td,  $J$  = 7.64, 1.86 Hz), 7.27 (1H, dt,  $J$  = 8.17, 1.30 Hz), 7.09 (1H, ddd,  $J$  = 7.56, 4.85, 1.20 Hz), 6.18 (1H, s), 5.78 (1H, s), 4.35 (1H, d,  $J$  = 10.93 Hz), 3.74 (3H, s), 3.45 (1H, td,  $J$  = 11.30, 4.98 Hz), 2.46-2.30 (2H, m), 2.11-2.00 (1H, m), 1.81-1.73 (1H, m), 1.68-1.63 (3H, m), 0.91-0.80 (1H, m); **<sup>13</sup>C NMR** (126 MHz, CDCl<sub>3</sub>)  $\delta$  212.2, 167.8, 160.6, 149.8, 142.3, 136.5, 124.8, 124.1, 121.7, 55.3, 52.1, 47.0, 42.9, 33.4, 29.0, 25.1. **HRMS (ESI)** Calculated for C<sub>16</sub>H<sub>20</sub>NO<sub>3</sub><sup>+</sup> ([M+H]<sup>+</sup>) 274.1438. Found 274.1448.  $[\alpha]_D^{25}$  = +58.5 ( $c$  = 1.66, CHCl<sub>3</sub>). **HPLC** Phenomenex Lux Amylose-2 (80:20 *n*-hexane: 2-propanol, 1 mL/min, 218 nm); tr (minor) = 11.9, tr (major) = 15.3 (81:19 e.r.)

**ethyl 2-((S)-((R)-2-oxocyclohexyl)(phenyl)methyl)acrylate (3ad)**

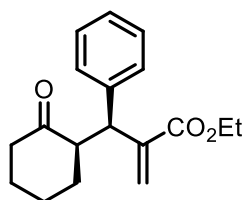

*3ad* was prepared following the abovementioned procedure.

66% yield (38 mg, 0.13 mmol), yellow solid. **<sup>1</sup>H NMR** (500 MHz, CDCl<sub>3</sub>)  $\delta$  7.35-7.20 (5H, m), 6.27 (1H, s), 5.63 (1H, s), 4.27 (1H, d,  $J$  = 11.28 Hz), 4.24-4.09 (2H, m), 3.12 (1H, td,  $J$  = 11.11, 5.00 Hz), 2.54-2.45 (1H, m), 2.45-2.35 (1H, m), 1.88-1.81 (1H, m), 1.80-1.69 (2H, m), 1.65-1.56 (1H, m), 1.41-1.29 (2H, m), 1.25 (3H, t,  $J$  = 7.16 Hz); **<sup>13</sup>C NMR** (126 MHz, CDCl<sub>3</sub>)  $\delta$  212.2, 166.9, 143.5, 140.9, 128.7, 128.6, 126.8, 122.7, 60.9, 54.9, 45.7, 42.6, 33.4, 29.2, 24.8, 14.2. **HRMS (ESI)** Calculated for C<sub>18</sub>H<sub>23</sub>O<sub>3</sub><sup>+</sup> ([M+H]<sup>+</sup>) 287.1642. Found 287.1646.  $[\alpha]_D^{25}$  = +138.3 ( $c$  = 1.03, CHCl<sub>3</sub>). **HPLC** Phenomenex Lux Cellulose-5 (95:5 *n*-hexane: 2-propanol, 1 mL/min, 218 nm); tr (major) = 54.7, tr (minor) = 77.8 (96:4 e.r.)

**hexyl 2-((S)-((R)-2-oxocyclohexyl)(phenyl)methyl)acrylate (3ae)**

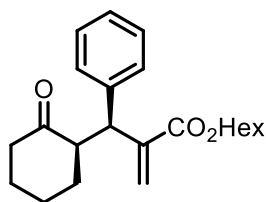

*3ae* was prepared following the abovementioned procedure.

64% yield (44 mg, 0.13 mmol), yellow oil. **<sup>1</sup>H NMR** (500 MHz, CDCl<sub>3</sub>)  $\delta$  7.36-7.21 (5H, m), 6.27 (1H, s), 5.63 (1H, s), 4.28 (1H, d,  $J$  = 11.19 Hz), 4.18-4.03 (2H, m), 3.12 (1H, td,  $J$  = 11.00, 4.99 Hz), 2.56-2.45 (1H, m), 2.45-2.35 (1H, m), 2.14-2.01 (1H, m), 1.90-1.81 (1H, m), 1.81-1.75 (1H, m), 1.75-1.69 (1H, m), 1.64-1.61 (2H, m), 1.42-1.29 (8H, m), 0.91 (3H, t,  $J$  = 6.8 Hz); **<sup>13</sup>C NMR** (126 MHz, CDCl<sub>3</sub>)  $\delta$  212.2, 166.9, 143.4, 140.8, 128.7, 128.5, 126.8, 122.7, 65.1, 54.9, 45.7, 42.6, 33.4, 31.5, 29.2, 28.6, 25.7, 24.7, 22.6, 14.1. **HRMS (ESI)** Calculated for C<sub>22</sub>H<sub>31</sub>O<sub>3</sub><sup>+</sup> ([M+H]<sup>+</sup>) 343.2268. Found 343.2269.  $[\alpha]_D^{25}$  = +113.9 ( $c$  = 1.74, CHCl<sub>3</sub>). **HPLC** Phenomenex Lux Cellulose-5 (80:20 *n*-hexane: 2-propanol, 1 mL/min, 218 nm); tr (major) = 15.6, tr (minor) = 24.5 (94:6 e.r.)

**rac-tert-butyl 2-((2-oxocyclohexyl)(phenyl)methyl)acrylate (3af)**

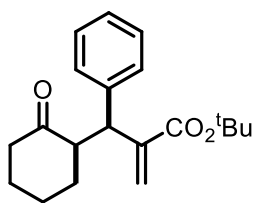

*3af* was prepared following the procedure described in C.

20% yield (13 mg, 0.04 mmol), yellow oil.  $^1\text{H NMR}$  (500 MHz,  $\text{CDCl}_3$ )  $\delta$  7.37-7.22 (5H, m), 6.20 (1H, s), 5.53 (1H, s), 4.26 (1H, d,  $J = 10.94$  Hz), 3.08 (1H, td,  $J = 10.78, 5.03$  Hz), 2.56-2.47 (1H, m), 2.46-2.35 (1H, m), 2.13-2.04 (1H, m), 1.90-1.82 (1H, m), 1.82-1.70 (2H, m), 1.70-1.58 (2H, m), 1.43 (9H, s);  $^{13}\text{C NMR}$  (126 MHz,  $\text{CDCl}_3$ )  $\delta$  212.3, 166.2, 144.8, 141.1, 128.8, 128.5, 126.7, 121.9, 80.8, 54.9, 45.6, 42.6, 33.4, 29.8, 29.2, 28.1, 28.1, 24.8. **HRMS (ESI)** Calculated for  $\text{C}_{20}\text{H}_{26}\text{NaO}_3^+$  ( $[\text{M}+\text{Na}]^+$ ) 337.1774. Found 337.1774. **HPLC** (for racemic) Phenomenex Lux Cellulose-5 (90:10 *n*-hexane: 2-propanol, 1 mL/min, 218 nm);  $t_r = 11.4$ ,  $t_r = 13.6$ .

**methyl 2-(phenyl((1*R*,4*S*)-4,7,7-trimethyl-3-oxobicyclo[2.2.1]heptan-2-yl)methyl)acrylate (3ag)**

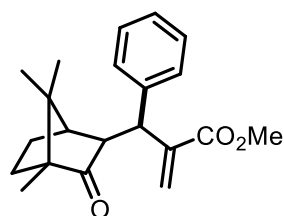

*3ag* was prepared following the abovementioned procedure.

6% yield (4 mg, 0.012 mmol), yellow oil.  $^1\text{H NMR}$  (500 MHz,  $\text{CDCl}_3$ )  $\delta$  7.33-7.26 (4H, m), 7.24-7.18 (1H, m), 6.29 (1H, s), 5.63 (1H, s), 4.05 (1H, d,  $J = 11.98$  Hz), 3.74 (3H, s), 3.26 (1H, dd,  $J = 12.04, 4.27$  Hz), 1.87-1.82 (1H, m), 1.70-1.59 (3H, m), 1.52-1.45 (1H, m), 0.93 (3H, s), 0.92 (3H, s), 0.88 (3H, s);  $^{13}\text{C NMR}$  (126 MHz,  $\text{CDCl}_3$ )  $\delta$  218.7, 167.6, 143.3, 141.6, 128.6, 128.4, 126.8, 125.4, 59.4, 52.6, 47.0, 45.4, 45.0, 30.7, 29.8, 20.7, 19.8, 19.3, 9.8. **HRMS (ESI)** Calculated for  $\text{C}_{21}\text{H}_{27}\text{O}_3^+$  ( $[\text{M}+\text{H}]^+$ ) 327.1955. Found 327.1959.  $[\alpha]_D^{25} = +20.6$  ( $c = 0.35$ ,  $\text{CHCl}_3$ ).

**methyl (E)-3-phenyl-2-(((1*R*,4*S*)-4,7,7-trimethyl-3-oxobicyclo[2.2.1]heptan-2-yl)methyl)acrylate (4b)**

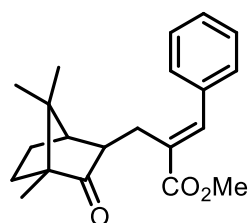

12% yield (8 mg, 0.02 mmol), yellow oil.  $^1\text{H NMR}$  (400 MHz,  $\text{CDCl}_3$ )  $\delta$  7.71 (1H, d,  $J = 1.09$  Hz), 7.44 – 7.35 (4H, m), 7.35 – 7.27 (1H, m), 3.82 (3H, s), 3.03 (1H, ddd,  $J = 13.66, 4.34, 1.28$  Hz), 2.74 – 2.65 (1H, m), 2.61 (1H, dd,  $J = 13.66, 9.94$  Hz), 1.92 – 1.85 (1H, m), 1.59 – 1.50 (2H, m), 1.35 – 1.27 (1H, m), 1.18 – 1.09 (1H, m), 0.92 (3H, s), 0.86 (3H, s), 0.78 (3H, s);  $^{13}\text{C NMR}$  (100 MHz,  $\text{CDCl}_3$ )  $\delta$  220.4, 168.9, 140.1, 135.6, 131.9, 129.4, 128.7, 128.6, 58.7, 52.2, 49.6, 46.6, 45.8, 31.1, 24.4, 20.2, 19.7, 19.4, 9.7. **HRMS (ESI)** Calculated for  $\text{C}_{21}\text{H}_{27}\text{O}_3^+$  ( $[\text{M}+\text{H}]^+$ ) 327.1955. Found 327.1962.  $[\alpha]_D^{25} = +171.6$  ( $c = 1.32$ ,  $\text{CHCl}_3$ ).

**methyl 5-((3S,8S,9S,10R,13S,14S,17S)-3-acetoxy-10,13-dimethyl-2,3,4,7,8,9,10,11,12,13,14,15,16,17-tetradecahydro-1H-cyclopenta[a]phenanthren-17-yl)-2-methylene-5-oxo-3-phenylpentanoate (3ah)**

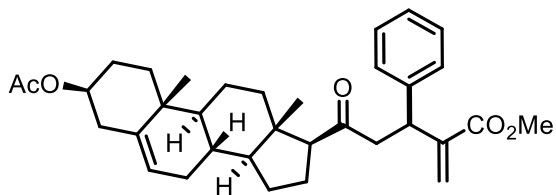

*3ah* was prepared following the abovementioned procedure.

52% yield (55 mg, 0.10 mmol), d.r. = 2:1, yellow oil.  $^1\text{H NMR}$  (400 MHz,  $\text{CDCl}_3$ )  $\delta$  7.39-7.22 (5H, m), 6.30 (1H, s), 5.87 (1H, s), 5.82 (1H, s), 5.38 (1H, d,  $J = 4.72$  Hz), 4.67-4.54 (1H, m), 3.97-3.90 (2H, m), 3.74 (3H, m), 2.36-2.28 (2H, m), 2.17 (1H, t,  $J = 9.70$  Hz), 2.03 (3H, s), 1.99-1.92 (1H, m), 1.90-1.80 (3H, m), 1.79-1.61 (3H, m), 1.58-1.51 (2H, m), 1.50-1.40 (2H, m), 1.23-1.05 (4H, m), 1.02 (3H, m), 0.99-0.91 (1H, m), 0.90-0.83 (1H, m), 0.63 (3H, m);  $^{13}\text{C NMR}$  (100 MHz,  $\text{CDCl}_3$ )  $\delta$  170.7, 166.4, 161.7, 141.1, 139.9, 139.8, 128.4, 127.8, 127.1, 125.8, 122.6, 84.6, 76.3, 74.1, 56.2, 55.4, 52.1, 50.4, 43.3, 38.5, 38.3, 37.2, 36.8, 32.2, 32.0, 27.9, 24.6, 24.4, 21.6, 21.2, 19.5, 13.0. **HRMS (ESI)** Calculated for  $\text{C}_{34}\text{H}_{45}\text{O}_5^+$  ( $[\text{M}+\text{H}]^+$ ) 533.3262. Found 533.3261.  $[\alpha]_{\text{D}}^{25} = -8.6$  ( $c = 1.93$ ,  $\text{CHCl}_3$ ).

**methyl 5-((3S,8S,9S,10R,13S,14S,17S)-3-acetoxy-10,13-dimethyl-2,3,4,7,8,9,10,11,12,13,14,15,16,17-tetradecahydro-1H-cyclopenta[a]phenanthren-17-yl)-2-methylene-5-oxo-3-phenylpentanoate (3ah')**

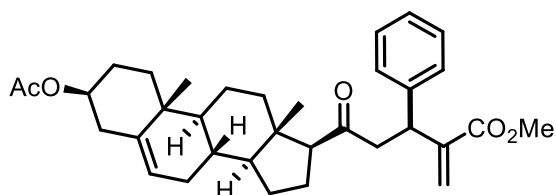

*3ah'* was prepared following the abovementioned procedure.

52% yield (55 mg, 0.10 mmol), d.r. = 1:2, yellow solid.  $^1\text{H NMR}$  (400 MHz,  $\text{CDCl}_3$ )  $\delta$  7.30-7.14 (5H, m), 6.29 (1H, s), 5.59 (1H, s), 5.36 (1H, d,  $J = 4.80$  Hz), 4.67-4.53 (1H, m), 4.48 (1H, t,  $J = 7.39$  Hz), 3.67 (3H, m), 3.02-2.86 (2H, m), 2.36 (1H, t,  $J = 9.19$  Hz), 2.35-2.27 (2H, m), 2.14-2.05 (1H, m), 2.03 (3H, s), 2.00-1.92 (1H, m), 1.90-1.82 (2H, m), 1.69-1.58 (4H, m), 1.53-1.40 (4H, m), 1.20-1.05 (4H, m), 1.01 (3H, s), 0.87-0.82 (1H, m), 0.59 (3H, s);  $^{13}\text{C NMR}$  (100 MHz,  $\text{CDCl}_3$ )  $\delta$  209.1, 170.7, 167.1, 143.1, 142.0, 139.8, 128.6, 128.0, 126.8, 124.7, 122.5, 74.0, 63.1, 57.0, 52.0, 50.0, 49.3, 44.4, 42.1, 39.0, 38.2, 37.1, 36.7, 31.9, 31.8, 27.9, 24.5, 23.1, 21.6, 21.2, 19.4, 13.5. **HRMS (ESI)** Calculated for  $\text{C}_{34}\text{H}_{45}\text{O}_5^+$  ( $[\text{M}+\text{H}]^+$ ) 533.3262. Found 533.3263.  $[\alpha]_{\text{D}}^{25} = +31.4$  ( $c = 1.97$ ,  $\text{CHCl}_3$ ).

**methyl 2-(((8*R*,9*S*,13*S*,14*S*)-3-acetoxy-13-methyl-17-oxo-7,8,9,11,12,13,14,15,16,17-decahydro-6*H*-cyclopenta[*a*]phenanthren-16-yl)(phenyl)methyl)acrylate (3ai)**

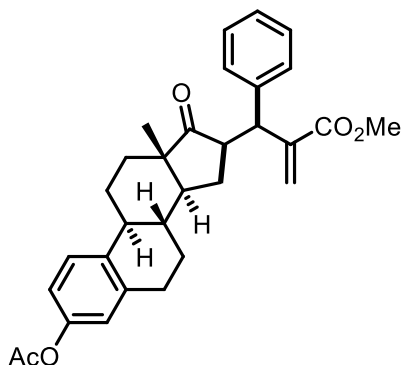

**3ai** was prepared following the abovementioned procedure. 41% yield (40 mg, 0.08 mmol), yellow oil. This product has been characterized as a mixture of diastereoisomers (dr = 5:3:1).

**<sup>1</sup>H NMR** (400 MHz, CDCl<sub>3</sub>)  $\delta$  (for major diastereomer) 7.31-7.10 (5H, m), 6.80-6.72 (3H, m), 6.41 (1H, s), 5.67 (1H, s), 4.59 (1H, d,  $J$  = 4.40 Hz), 3.62 (3H, s), 3.13-3.05 (1H, m), 2.82-2.74 (1H, m), 2.26 (3H, s), 2.26-2.18 (1H, m), 2.16-1.92 (2H, m), 1.90-1.71 (3H, m), 1.54-1.44 (1H, m), 1.44-1.26 (3H, m), 1.25-1.09 (1H, m), 1.04-0.94 (1H, m), 0.91 (3H, s),  $\delta$  (for medium diastereomer) 7.31-7.10 (5H, m), 6.86-6.80 (3H, m), 6.33 (1H, s), 5.72 (1H, s), 4.19 (1H, d,  $J$  = 7.33 Hz), 3.69 (3H, s), 3.36-3.28 (1H, m), 2.91-2.83 (1H, m), 2.39-2.29 (1H, m), 2.28 (3H, s), 2.16-2.07 (2H, m), 1.80-1.71 (3H, m), 1.53-1.44 (1H, m), 1.44-1.26 (3H, m), 1.25-1.09 (1H, m), 0.93 (3H, s), 0.90-0.80 (1H, m),  $\delta$  (for minor diastereomer) 7.31-7.10 (5H, m), 6.87-6.80 (3H, m), 6.42 (1H, s), 6.05 (1H, s), 4.11 (1H, d,  $J$  = 7.50 Hz), 3.67 (3H, s), 2.97-2.91 (1H, m), 2.91-2.83 (1H, m), 2.28 (3H, s), 2.26-2.19 (1H, m), 2.16-2.03 (2H, m), 1.80-1.71 (3H, m), 1.66-1.58 (1H, m), 1.44-1.27 (3H, m), 1.25-1.09 (1H, m), 1.04-0.94 (1H, m), 0.55 (3H, s); **<sup>13</sup>C NMR** (100 MHz, CDCl<sub>3</sub>)  $\delta$  (for major diastereomer) 220.4, 170.0, 146.8, 143.0, 129.0, 128.5, 128.4, 128.3, 127.2, 126.4, 124.7, 121.7, 121.6, 118.9, 118.8, 52.1, 48.2, 47.7, 46.5, 44.1, 31.6, 29.3, 26.1, 25.5, 25.4, 21.3, 15.0,  $\delta$  (for medium diastereomer) 219.5, 167.3, 148.7, 142.5, 141.2, 139.6, 138.1, 138.0, 137.5, 137.4, 126.9, 126.5, 52.1, 48.9, 48.6, 48.1, 47.9, 47.2, 44.3, 37.9, 31.8, 29.4, 27.8, 26.3, 25.7, 25.3,  $\delta$  (for minor diastereomer) 219.0, 167.6, 148.6, 142.2, 140.3, 138.1, 137.4, 129.2, 128.5, 128.4, 127.0, 126.6, 53.6, 51.9, 50.6, 49.8, 49.0, 48.6, 44.4, 38.1, 36.0, 32.2, 29.5, 28.7, 26.6, 26.5, 25.8, 13.0. **HRMS (ESI)** Calculated for C<sub>31</sub>H<sub>35</sub>O<sub>5</sub><sup>+</sup> ([M+H]<sup>+</sup>) 487.2479. Found 487.2489.

**rac-methyl (*E*)-2-((2-oxocyclohexyl)methyl)-3-phenylacrylate (4a)**

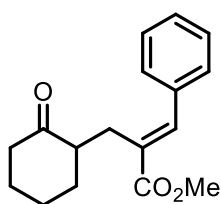

Allyl fluoride **2b** (38.8 mg, 1 equiv., 0.2 mmol) was weighted into a 5 mL vial equipped with a magnetic stirring bar and dissolved with 1 mL of distilled CH<sub>2</sub>Cl<sub>2</sub> (0.2 M). Subsequently, silyl enol ether **1b** (84.8 mg, 2 equiv., 0.4 mmol) and 0.2 mL of a solution of TBAF in THF 1M were added. The reaction mixture was stirred at room temperature until full conversion of the starting material was detected by TLC analysis. The crude product was directly purified by flash column chromatography using hexane and ethyl acetate mixtures.

30% yield (16 mg, 0.6 mmol), yellow oil. **<sup>1</sup>H NMR** (500 MHz, CDCl<sub>3</sub>)  $\delta$  7.75 (1H, s), 7.39-7.33 (4H, m), 7.33-7.27 (1H, m), 3.81 (3H, s), 3.04 (1H, ddd,  $J$  = 13.55, 4.19, 1.26 Hz), 2.69-2.54 (2H, m), 2.40-2.32 (1H, m), 2.31-2.20 (1H, m), 2.06-1.94 (2H, m), 1.76 (1H, dqd,  $J$  = 12.13, 3.53, 1.35 Hz), 1.65-1.58 (1H, m), 1.57-1.49 (1H, m), 1.24-1.12 (1H, m); **<sup>13</sup>C NMR** (126 MHz, CDCl<sub>3</sub>)  $\delta$  212.4, 168.9, 140.9, 135.8, 131.4, 129.3, 128.7, 128.5, 52.2, 49.8, 42.0, 33.3, 27.9, 26.9, 25.1. **HRMS (ESI)** Calculated for C<sub>17</sub>H<sub>21</sub>O<sub>3</sub><sup>+</sup> ([M+H]<sup>+</sup>) 273.1485. Found 273.1496.

## E.2. Limitations of the catalytic transformation

### $\alpha,\alpha$ -disubstituted silyl enol ethers

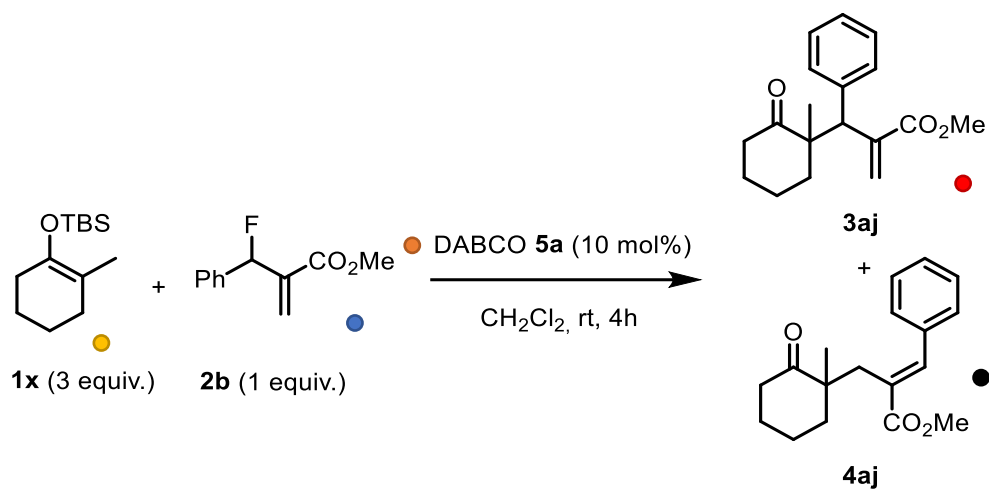

| Time (h) | Conversion (%) <sup>[a]</sup> | NMR yield (%) <sup>[a]</sup> | r.r. (3aj/4aj) | d.r.  |
|----------|-------------------------------|------------------------------|----------------|-------|
| 4        | >98                           | 12                           | 1:2            | >20:1 |

<sup>[a]</sup> Yield and conversion were determined by  $^1\text{H}$  NMR spectroscopy using 1,3,5-trimethoxybenzene as the internal standard.

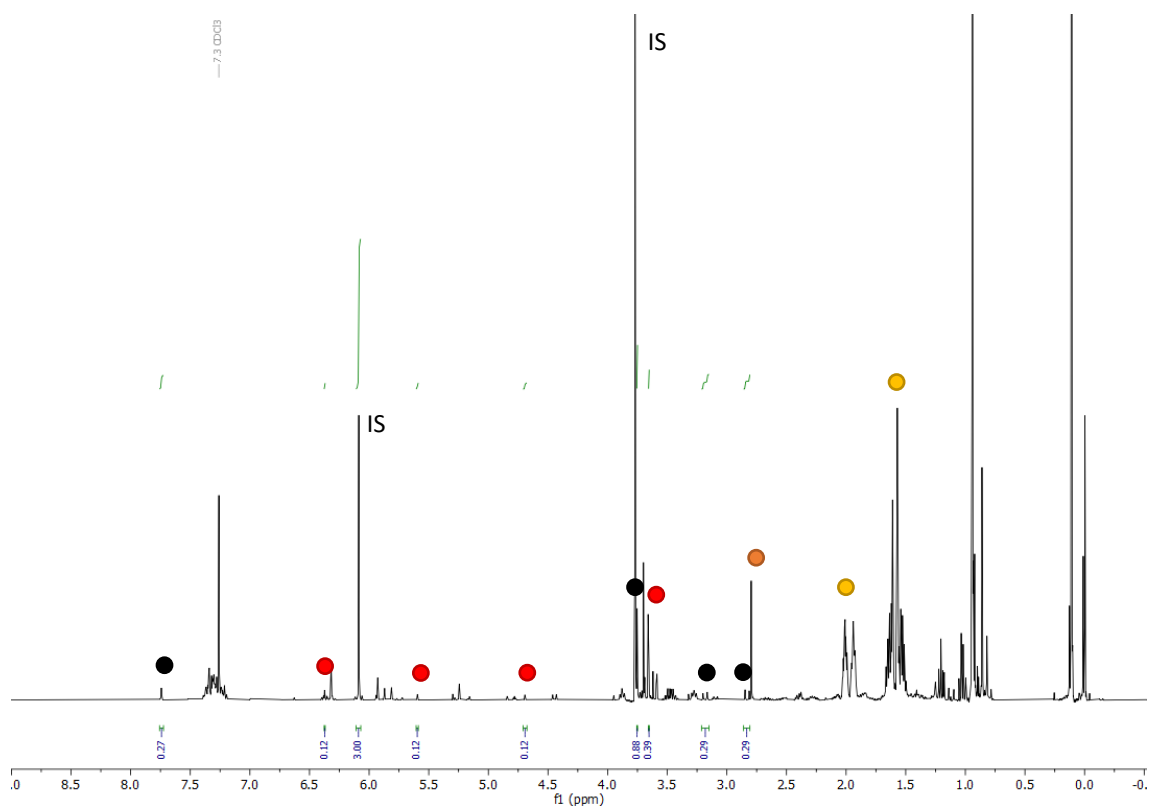

**Figure S2.**  $^1\text{H}$  NMR spectrum of the reaction crude with DABCO.

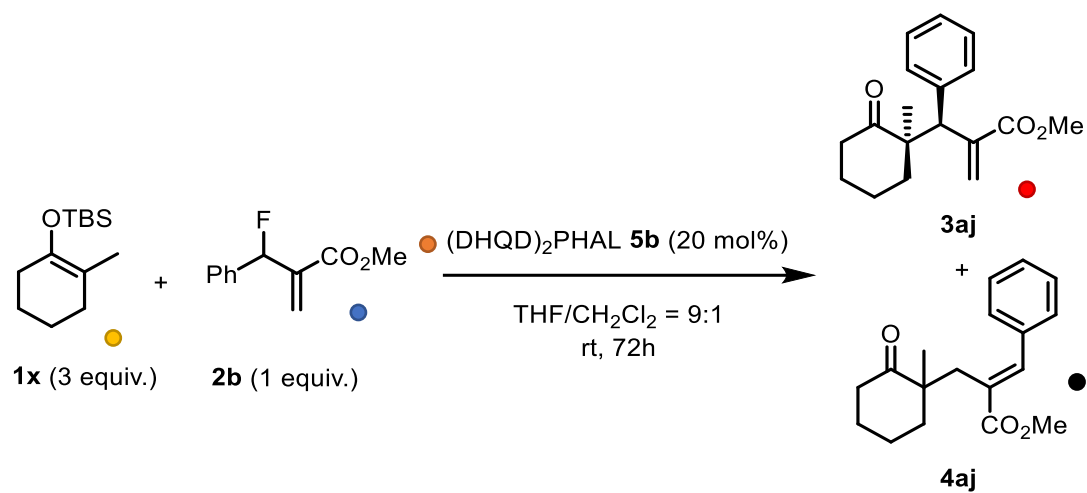

| Time (h) | Conversion (%) <sup>[a]</sup> | NMR yield (%) <sup>[a]</sup> | r.r. (3aj/4aj) | d.r. |
|----------|-------------------------------|------------------------------|----------------|------|
| 72       | 50                            | traces                       | 1:18           | n.d. |

<sup>[a]</sup> Yield and conversion were determined by <sup>1</sup>H NMR spectroscopy using 1,3,5-trimethoxybenzene as the internal standard.

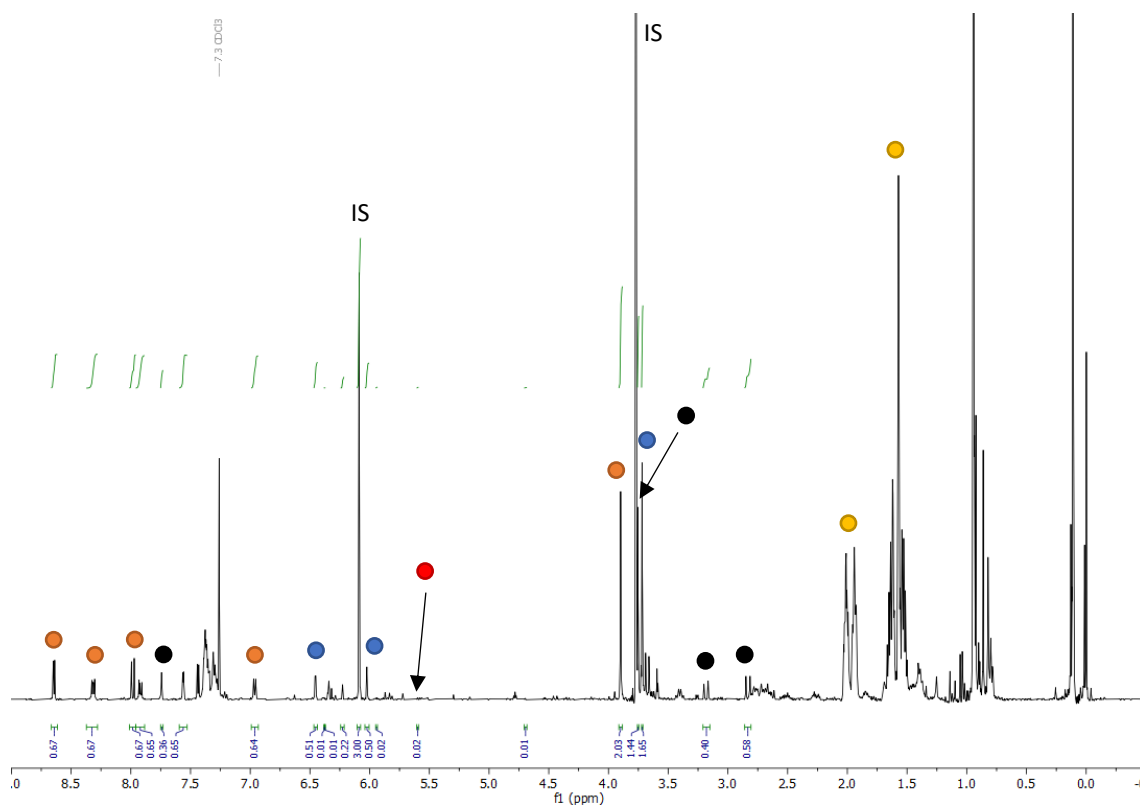

**Figure S3.** <sup>1</sup>H NMR spectrum of the reaction crude with (DHQD)<sub>2</sub>PHAL.

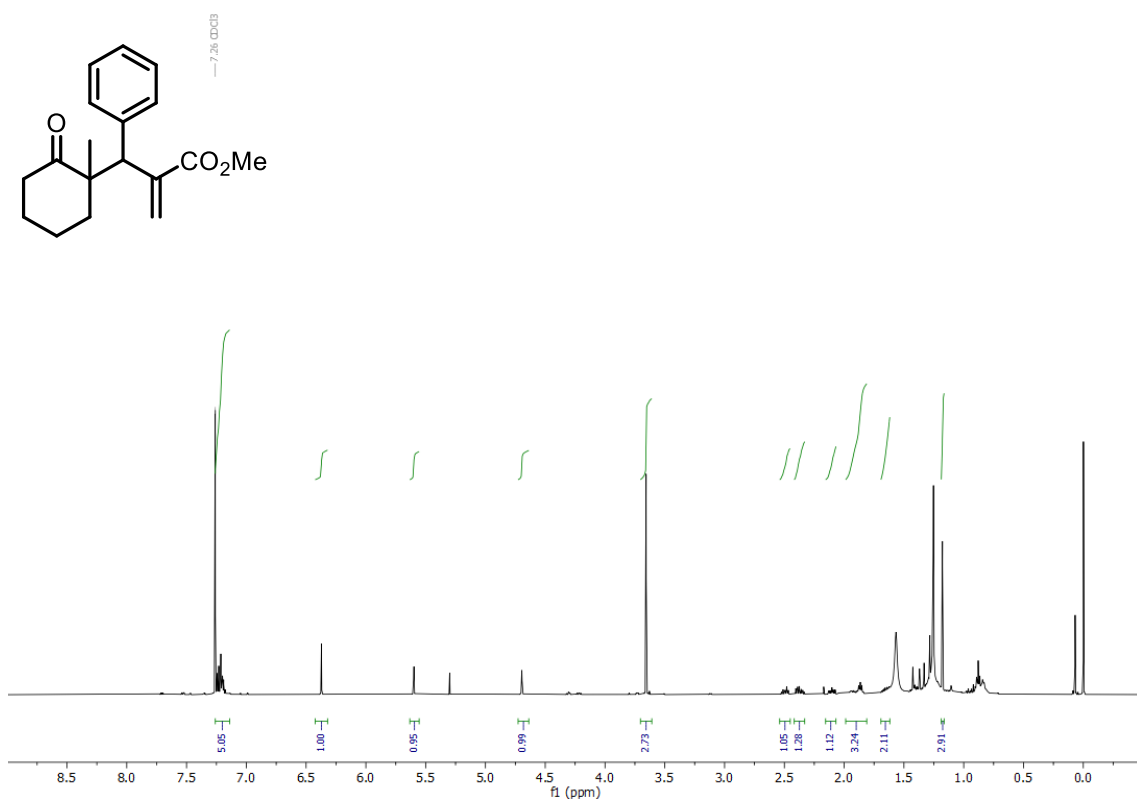

**Figure S4.**  $^1\text{H}$  NMR spectrum of **3aj**.

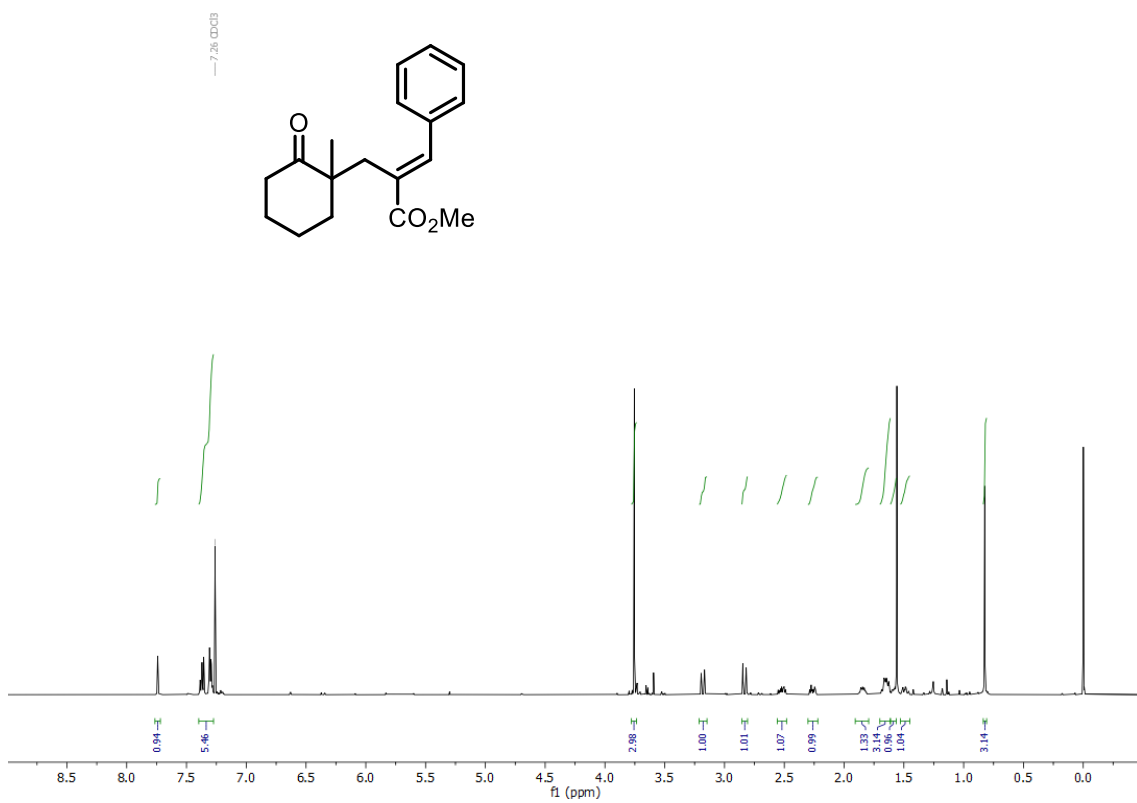

**Figure S5.**  $^1\text{H}$  NMR spectrum of **4aj**.

*Allyl fluorides bearing an aliphatic substituent*

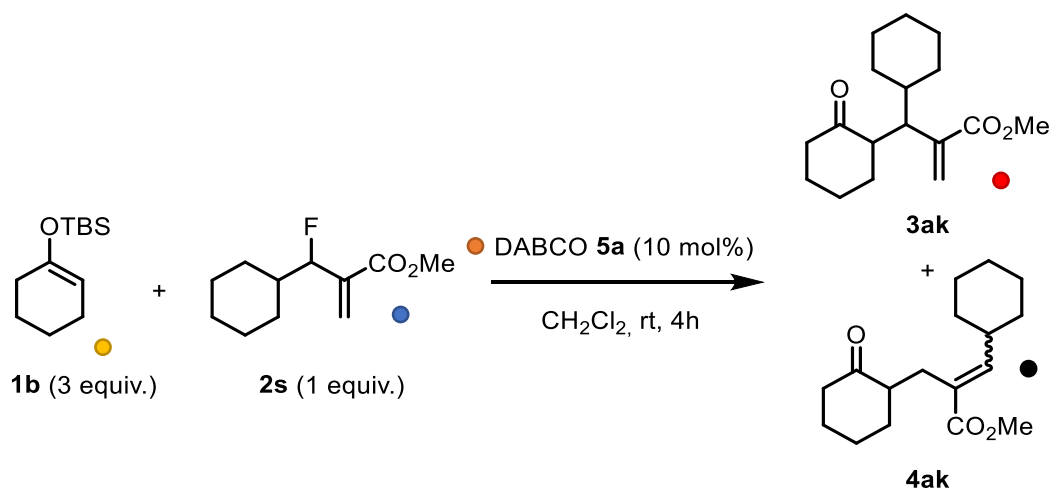

| Time (h) | Conversion (%) <sup>[a]</sup> | NMR yield (%) <sup>[a]</sup> | r.r. (3ak/4ak) | d.r.  |
|----------|-------------------------------|------------------------------|----------------|-------|
| 4        | >98                           | 30                           | 2.5:1          | 1.6:1 |

<sup>[a]</sup> Yield and conversion were determined by  $^1\text{H}$  NMR spectroscopy using 1,3,5-trimethoxybenzene as the internal standard.

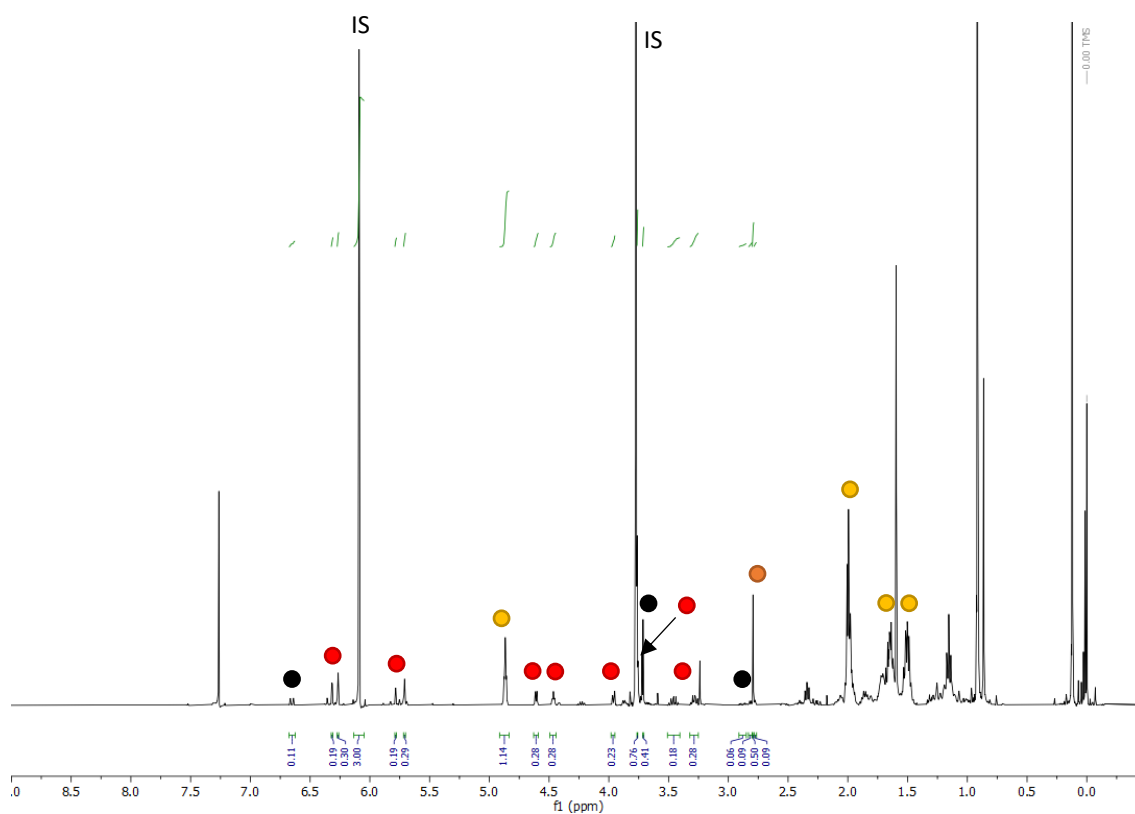

**Figure S6.**  $^1\text{H}$  NMR spectrum of the reaction crude with DABCO.

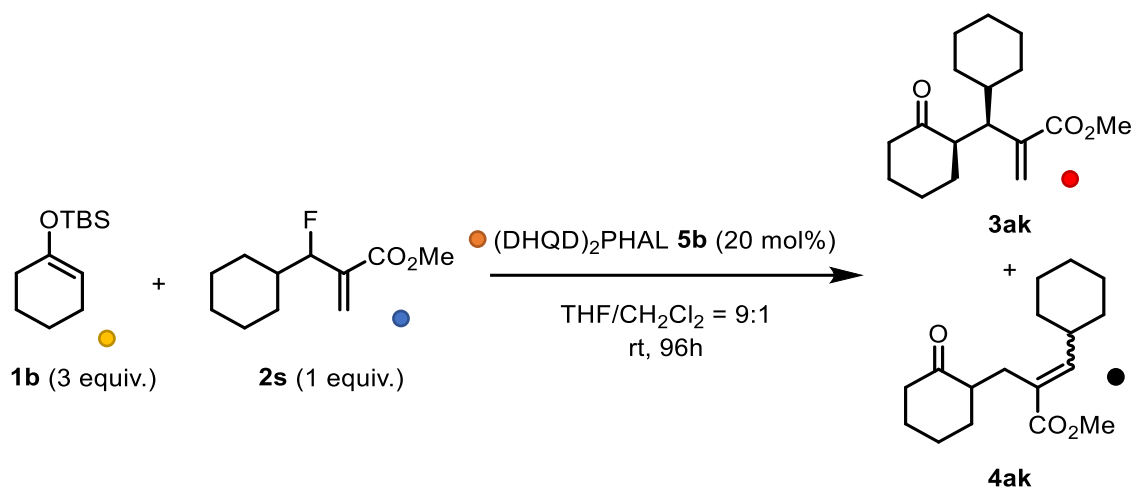

| Time (h) | Conversion (%) <sup>[a]</sup> | NMR yield (%) <sup>[a]</sup> | r.r. (3ak/4ak) | d.r. |
|----------|-------------------------------|------------------------------|----------------|------|
| 96       | 30                            | 10                           | 3.5:1          | 6:1  |

<sup>[a]</sup> Yield and conversion were determined by <sup>1</sup>H NMR spectroscopy using 1,3,5-trimethoxybenzene as the internal standard.

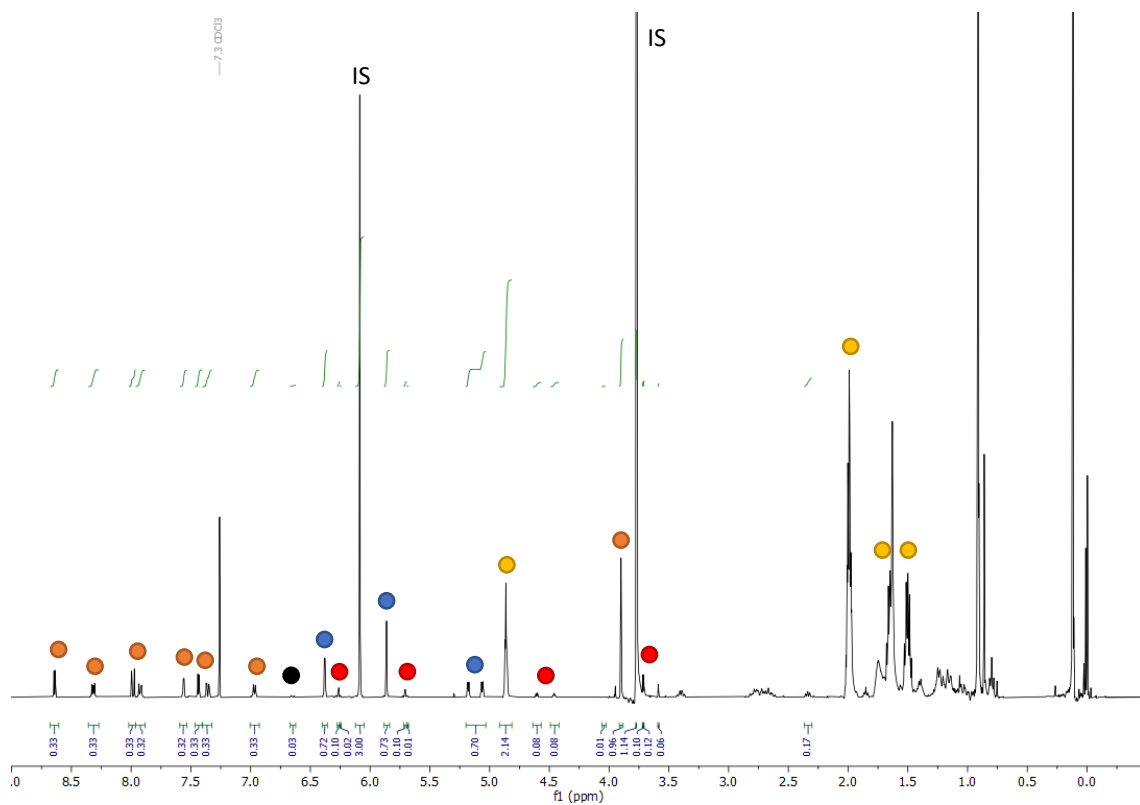

**Figure S7.** <sup>1</sup>H NMR spectrum of the reaction crude with (DHQD)<sub>2</sub>PHAL.

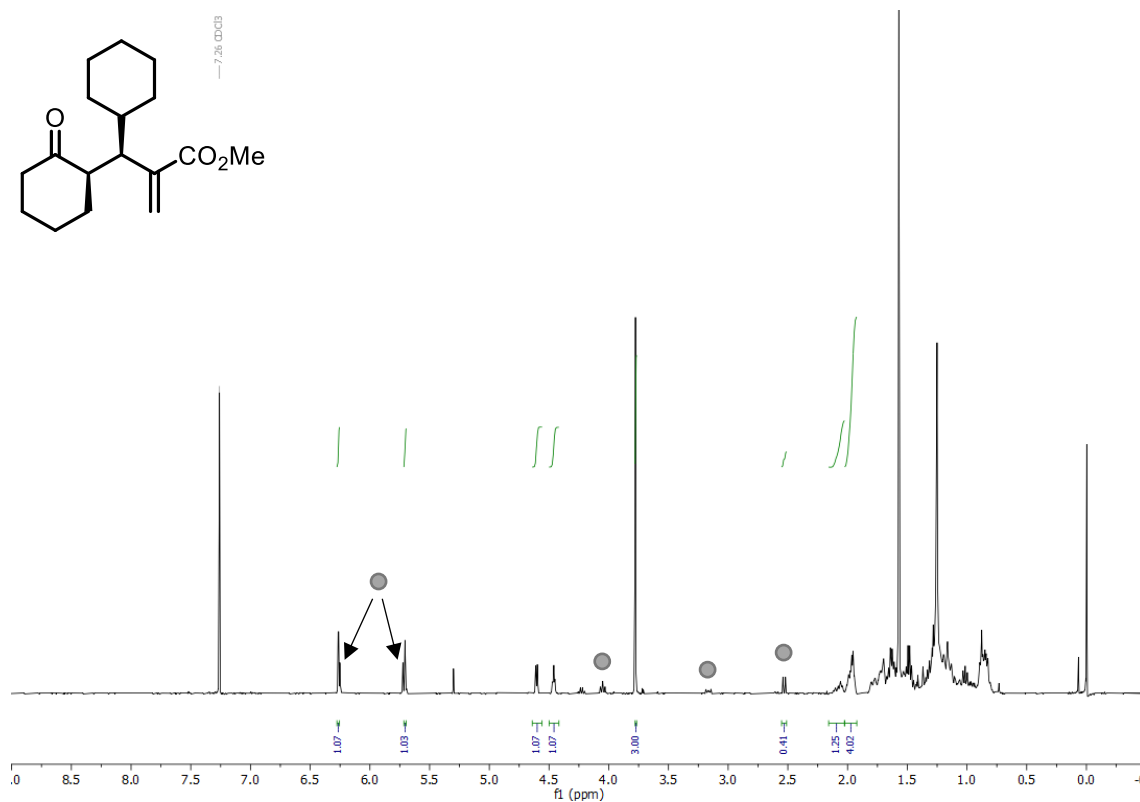

**Figure S8.** <sup>1</sup>H NMR spectrum of **3ak**. (Signals indicated with grey bubbles are not present in the crude mixture. They are degradation products that appear after the purification).

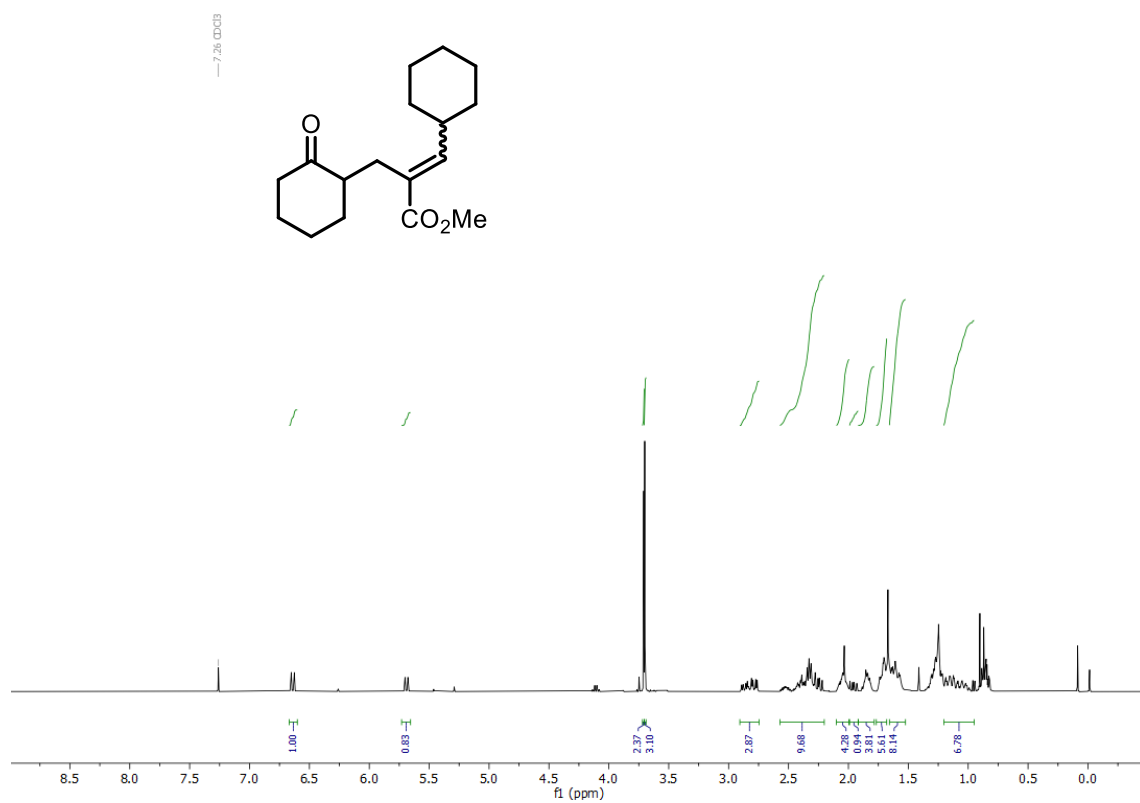

**Figure S9.** <sup>1</sup>H spectrum of **4ak**.

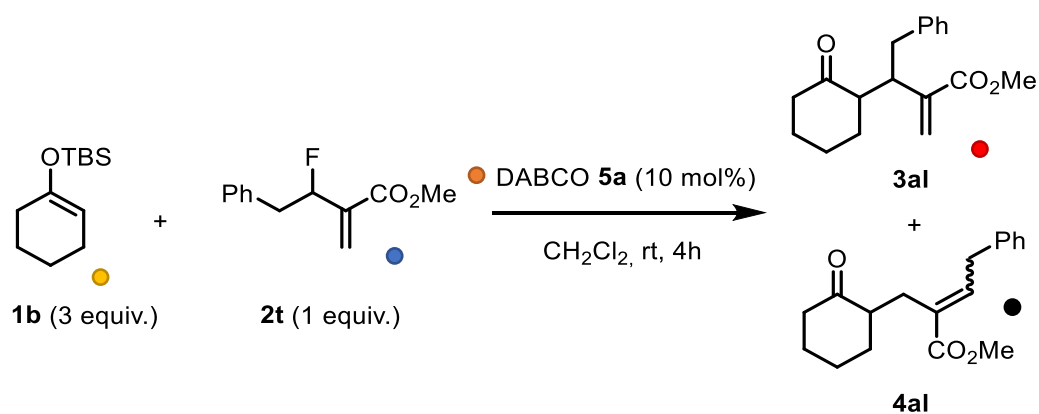

| Time (h) | Conversion (%) <sup>[a]</sup> | NMR yield (%) <sup>[a]</sup> | r.r. (3al/4al) | d.r. |
|----------|-------------------------------|------------------------------|----------------|------|
| 4        | 67                            | traces                       | n.d.           | n.d. |

<sup>[a]</sup> Yield and conversion were determined by  $^1\text{H}$  NMR spectroscopy using 1,3,5-trimethoxybenzene as the internal standard.

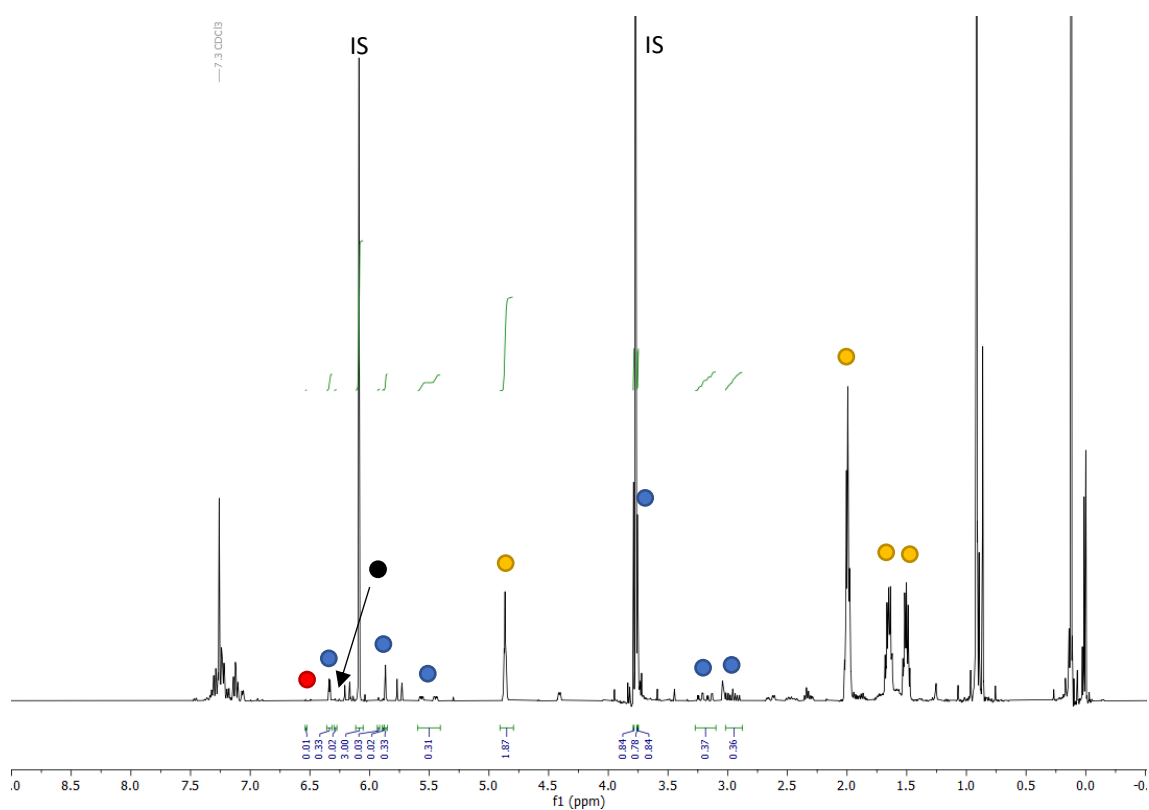

**Figure S10.**  $^1\text{H}$  NMR spectrum of the reaction crude with DABCO.

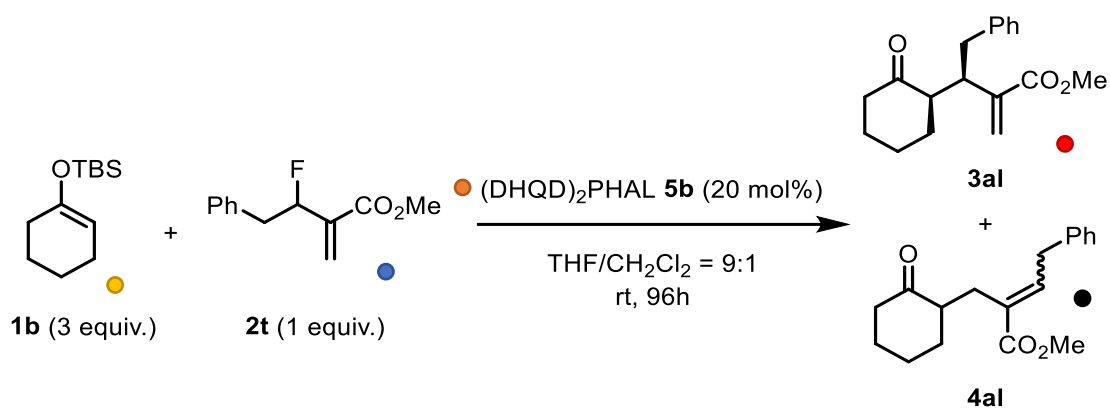

| Time (h) | Conversion (%) <sup>[a]</sup> | NMR yield (%) <sup>[a]</sup> | r.r. (3al/4al) | d.r. |
|----------|-------------------------------|------------------------------|----------------|------|
| 96       | 57                            | traces                       | n.d.           | n.d. |

<sup>[a]</sup> Yield and conversion were determined by <sup>1</sup>H NMR spectroscopy using 1,3,5-trimethoxybenzene as the internal standard.

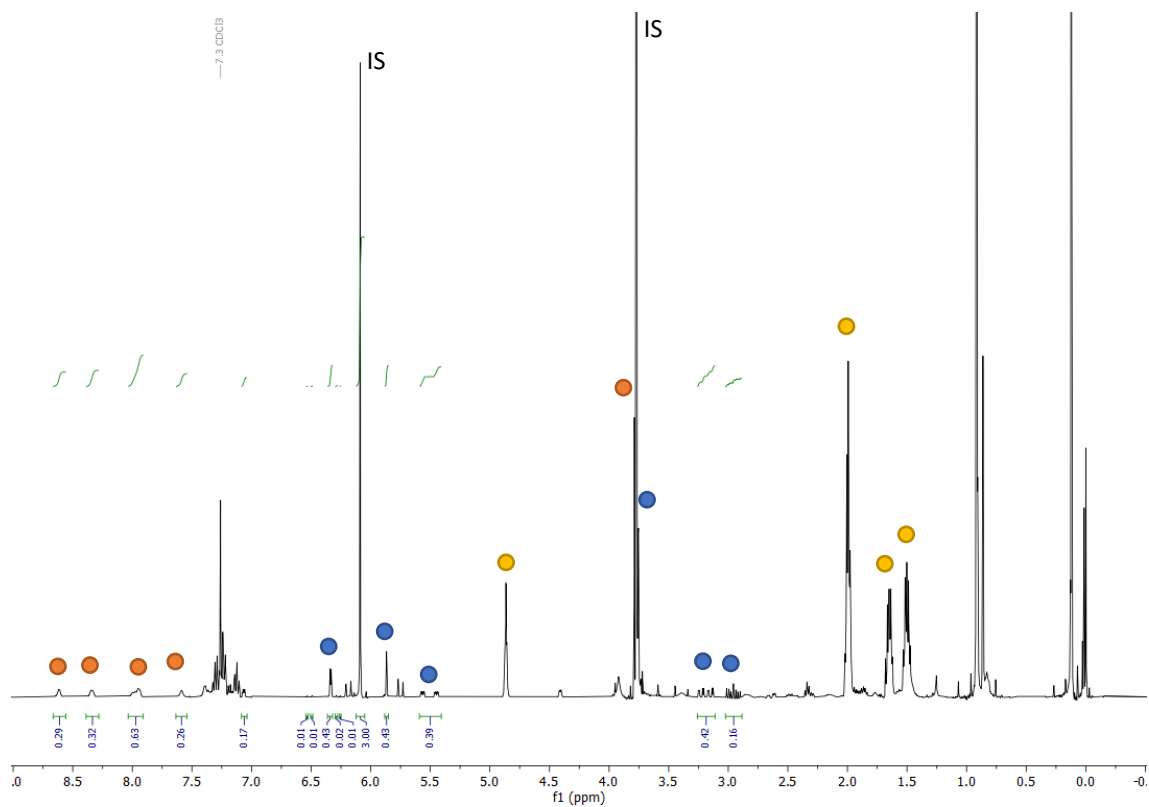

**Figure S11.** <sup>1</sup>H NMR spectrum of the reaction crude with  $(\text{DHQD})_2\text{PHAL}$ .

## F. Characterization of the catalytic species

### General procedure for the characterization of catalytic species

The corresponding allyl (1 equiv., 0.1 mmol) was weighted into an NMR tube and dissolved with 0.5 mL of the corresponding deuterated solvent (0.2 M). Then, the given amount of catalyst was added. To ensure homogeneous NMR samples, the tube was initially sonicated for 1 min.

#### F.1. Generation of the catalytic species with DABCO – Using 1 equiv. of DABCO and allyl carbonates

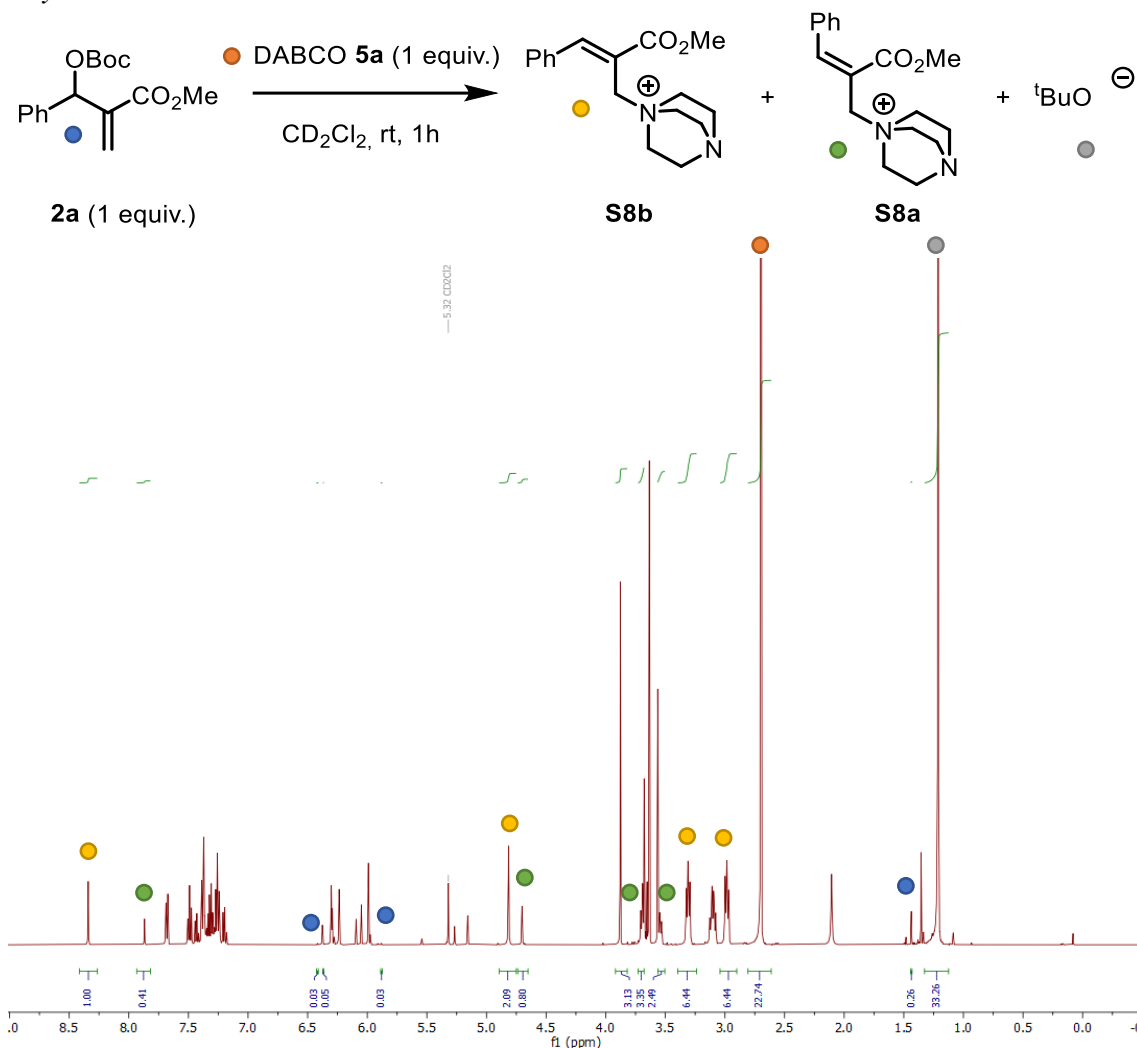

**Figure S12.** <sup>1</sup>H NMR spectrum at 500 MHz NMR field in CD<sub>2</sub>Cl<sub>2</sub> for the formation of the catalytic species using stoichiometric amounts of DABCO 5a.

[In this experiment, the utilization of stoichiometric amounts of DABCO 5a (orange bubble) leads to the formation of a 1 to 2.5 mixture of the Z- and E- isomers S8a and S8b (green and yellow bubbles respectively) of the catalytic species while consuming up to a 95% of the initial allyl carbonate 2a (blue bubbles) after 1h.]

**F.2. Generation of the catalytic species with DABCO – Using 20 mol% of DABCO and allyl carbonates**

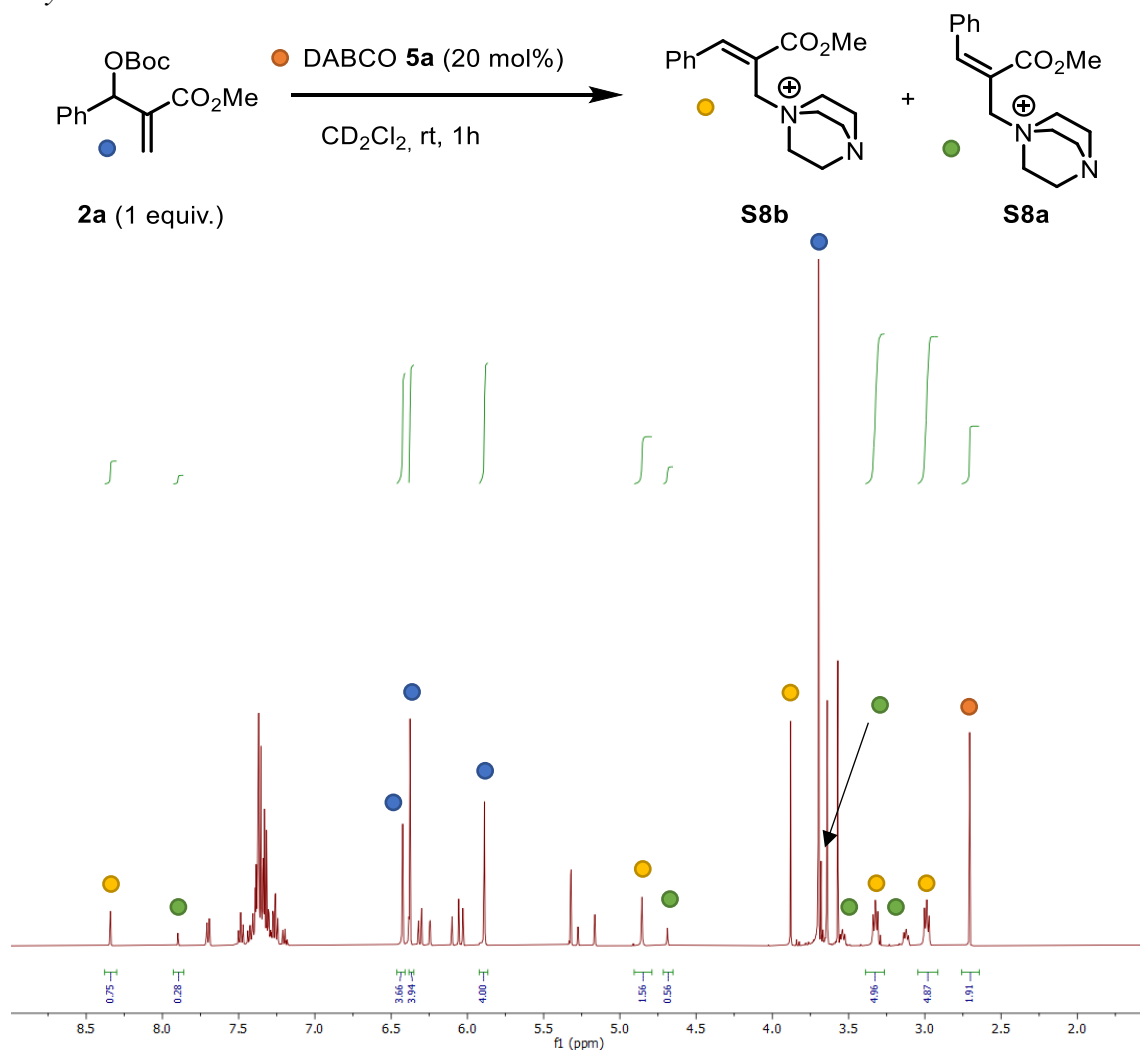

**Figure S13.**  $^1\text{H}$  NMR spectrum at 500 MHz NMR field in  $\text{CD}_2\text{Cl}_2$  for the formation of the catalytic species using 20 mol% of DABCO **5a**.

[In this experiment, the utilization of catalytic amounts of DABCO **5a** (orange bubble) leads to the formation of a 1 to 3 mixture of the Z- and E- isomers **S8a** and **S8b** (green and yellow bubbles respectively) of the catalytic species while observing an 80% of the unreacted allyl carbonate **2a** (blue bubbles) after 1h.]

**F.3. Generation of the catalytic species with DABCO** – Using 1 equiv. of DABCO and allyl fluorides

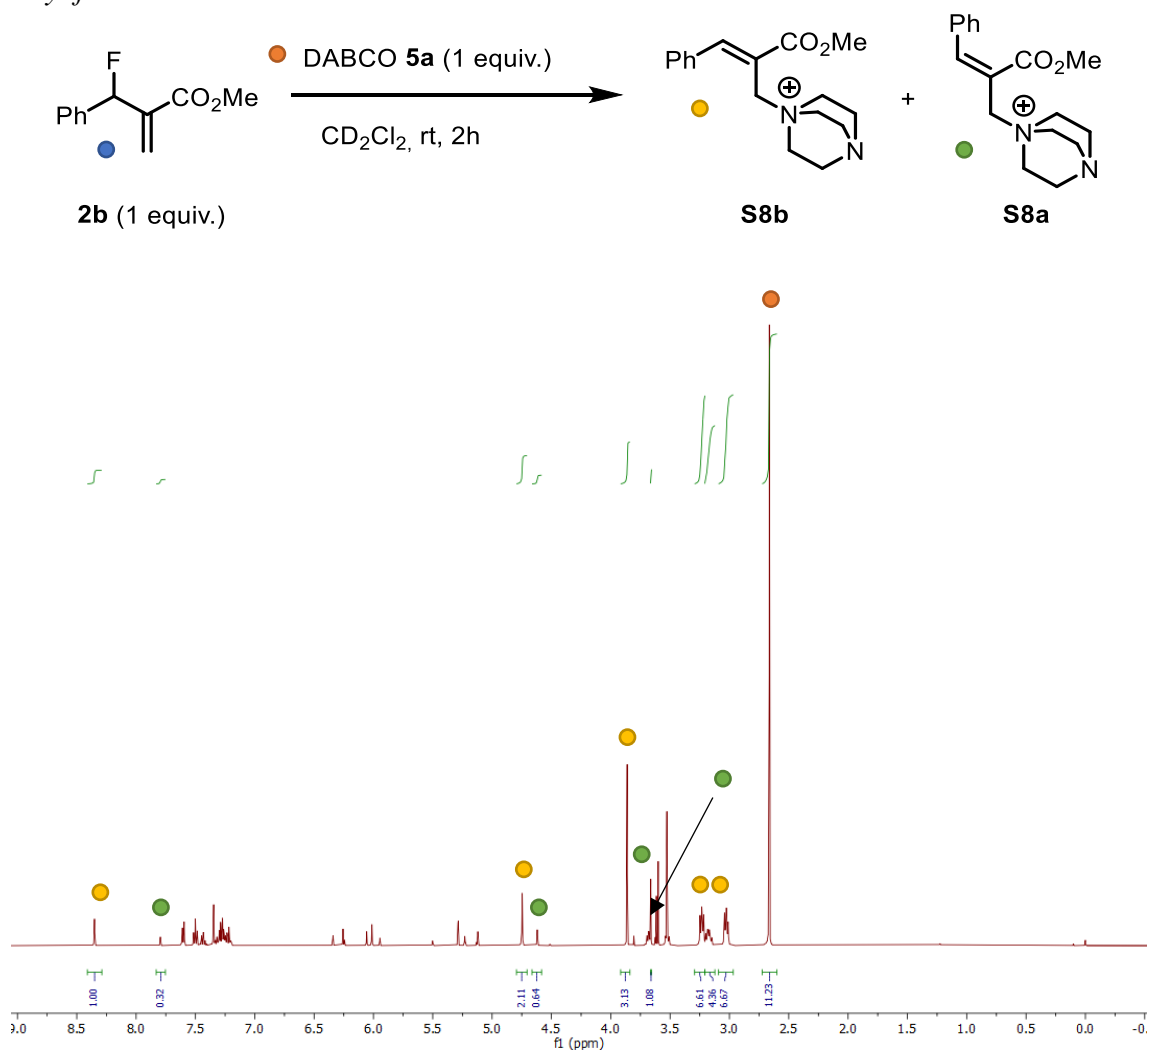

**Figure S14.**  $^1\text{H}$  NMR spectrum at 500 MHz NMR field in  $\text{CD}_2\text{Cl}_2$  for the formation of the catalytic species using 1 equiv. of DABCO **5a** and 1 equiv. of allyl fluoride **2b**.

[In this experiment, the utilization of stoichiometric amounts of DABCO **5a** (orange bubble) leads to the formation of a 1 to 3 mixture of the Z- and E- isomers **S8a** and **S8b** (green and yellow bubbles respectively) of the catalytic species while observing full consumption of the initial allyl fluoride **2b** (blue bubbles) after 2h.]

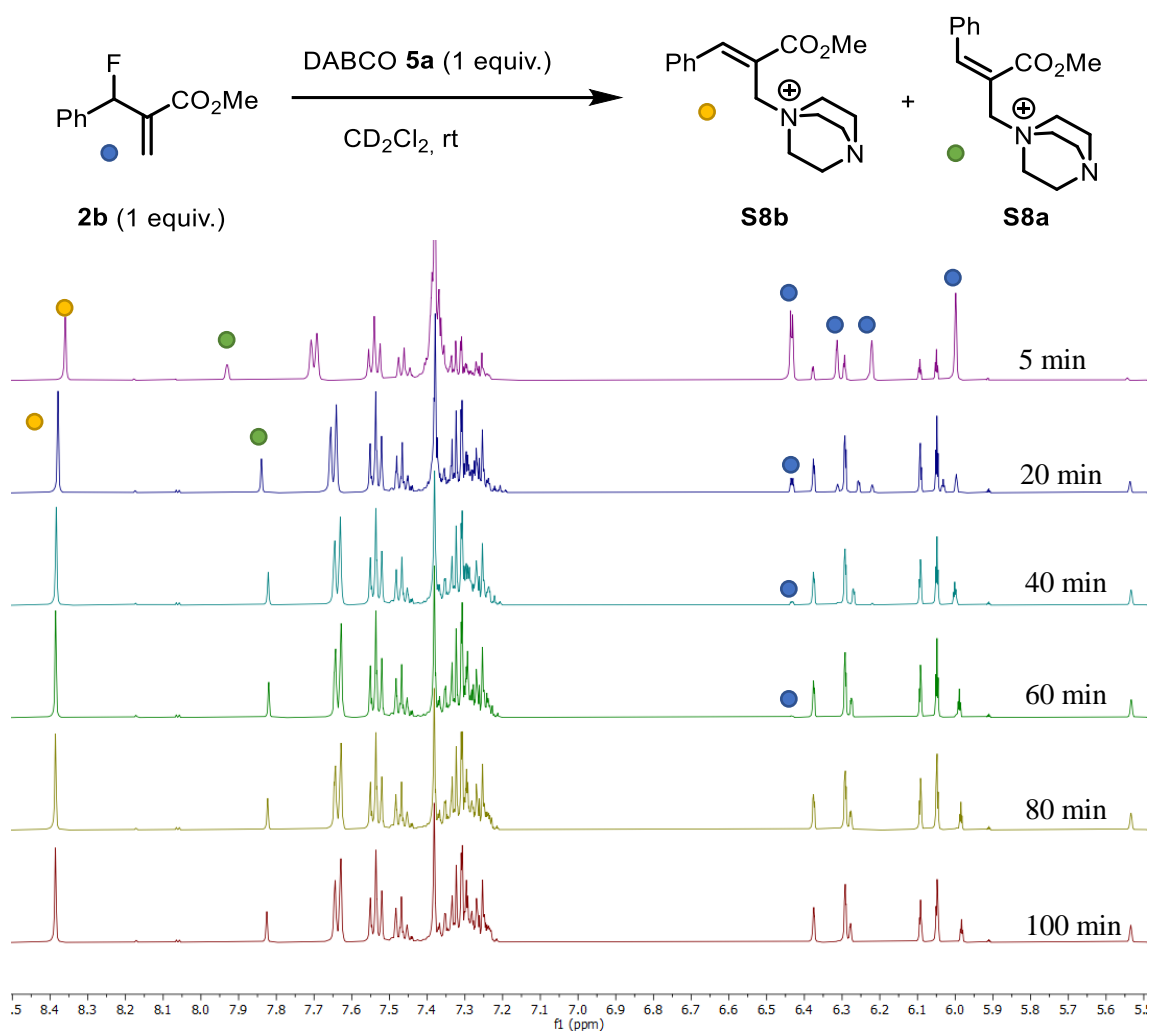

**Figure S15.**  $^1\text{H}$  NMR spectra overtime at 500 MHz in  $\text{CD}_2\text{Cl}_2$  for the formation of the catalytic species using 1 equiv. of DABCO **5a** and 1 equiv. of allyl fluoride **2b** over 100 min.

*[In this experiment, the utilization of stoichiometric amounts of DABCO **5a** leads to the full consumption of the initial allyl fluoride **2b** (blue bubbles) while the ratio of the Z- and E- isomers **S8a** and **S8b** (green and yellow bubbles respectively) remains stable overtime.]*

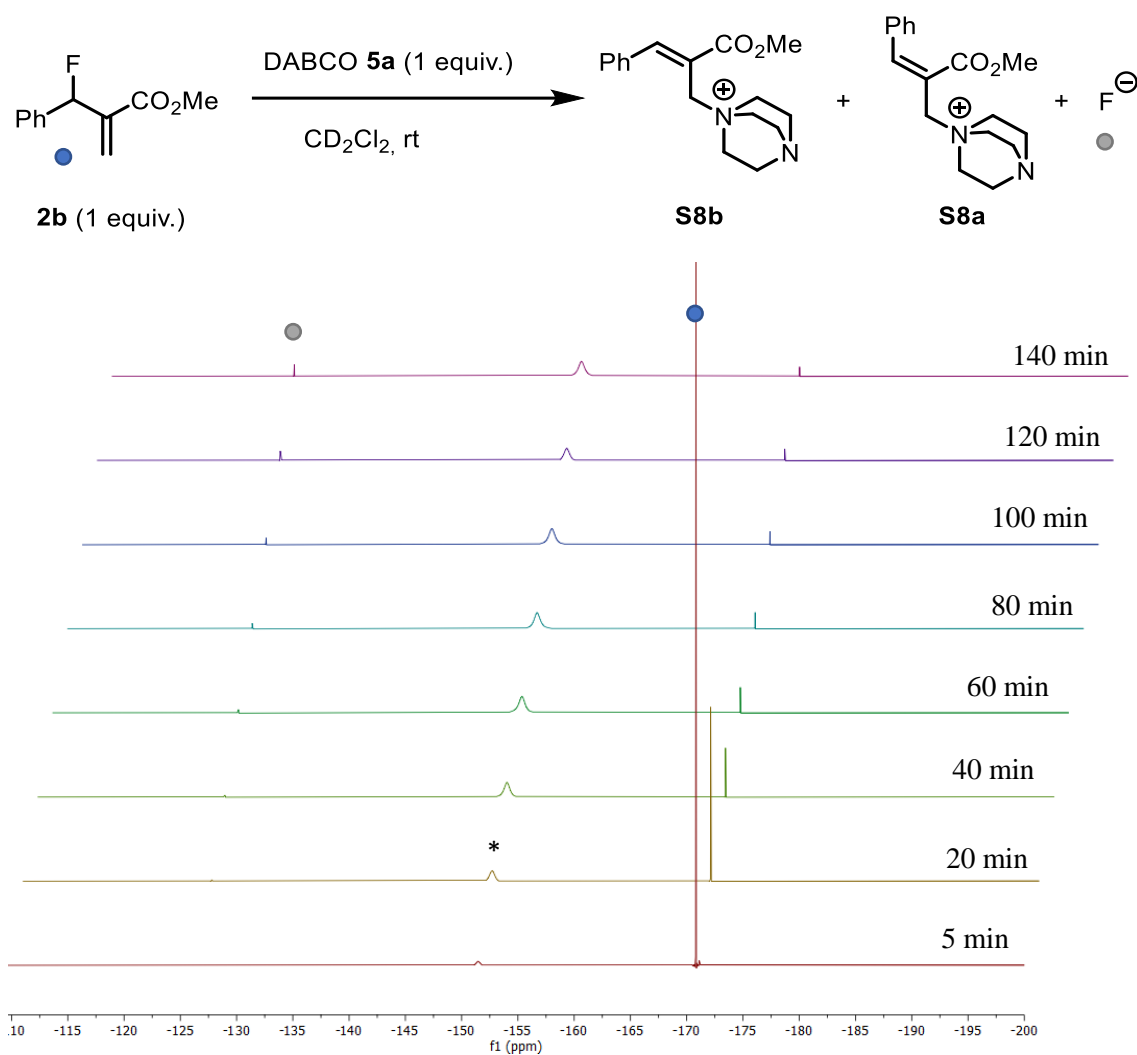

**Figure S16.**  $^{19}\text{F}\{^1\text{H}\}$  NMR spectra overtime at 470 MHz NMR field in  $\text{CD}_2\text{Cl}_2$  using 1 equiv. of DABCO **5a** and 1 equiv. of allyl fluoride **2b** over 140 min.

[In this experiment, the utilization of stoichiometric amounts of DABCO **5a** in the absence of a competitive fluorophilic trap leads to the formation of naked fluoride (grey bubbles, at -126.20 ppm), which matches with the  $^{19}\text{F}\{^1\text{H}\}$  NMR peak of an ammonium fluoride source, such as TBAF. (The signal marked with \* at -151 ppm is an artifact.<sup>13</sup>)].

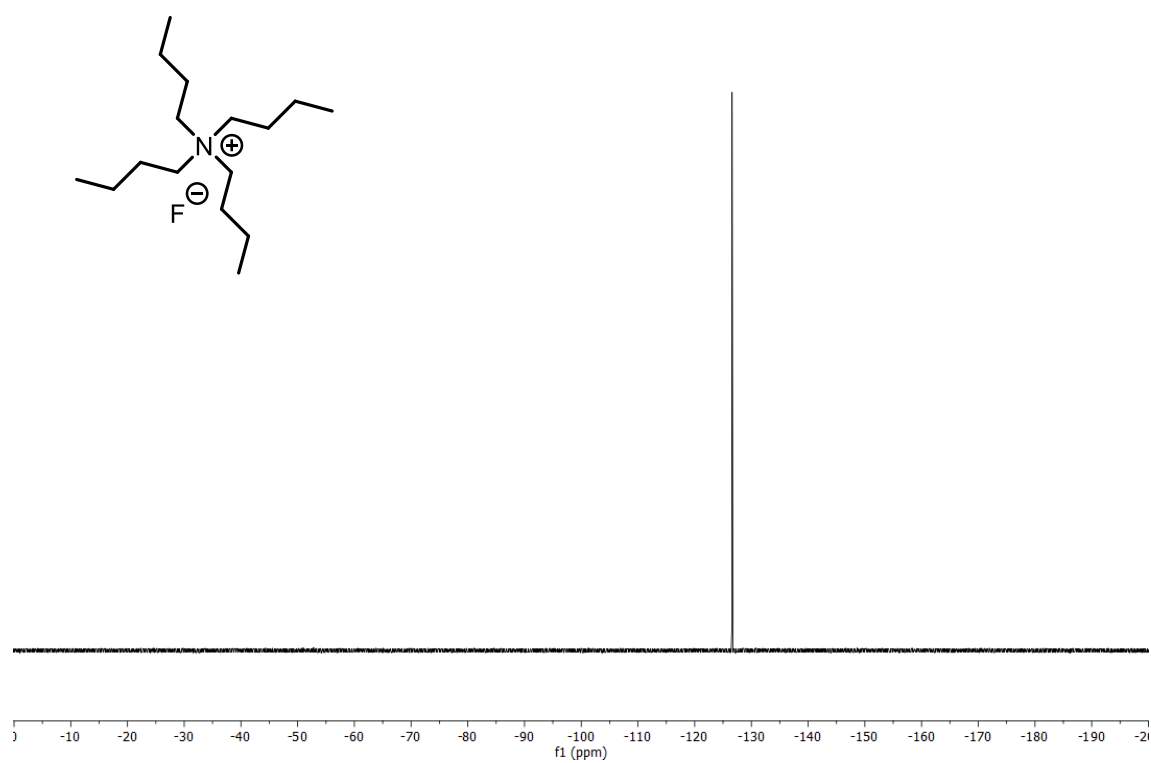

**Figure S17.**  $^{19}\text{F}\{^1\text{H}\}$  NMR spectra at 470 MHz NMR field in  $\text{THF-d}_8$  of TBAF.

*[ $^{19}\text{F}$  signal of TBAF appears at -126.59 ppm.]*

**F.4. Generation of the catalytic species with DABCO – Using 20 mol% of DABCO and allyl fluorides**

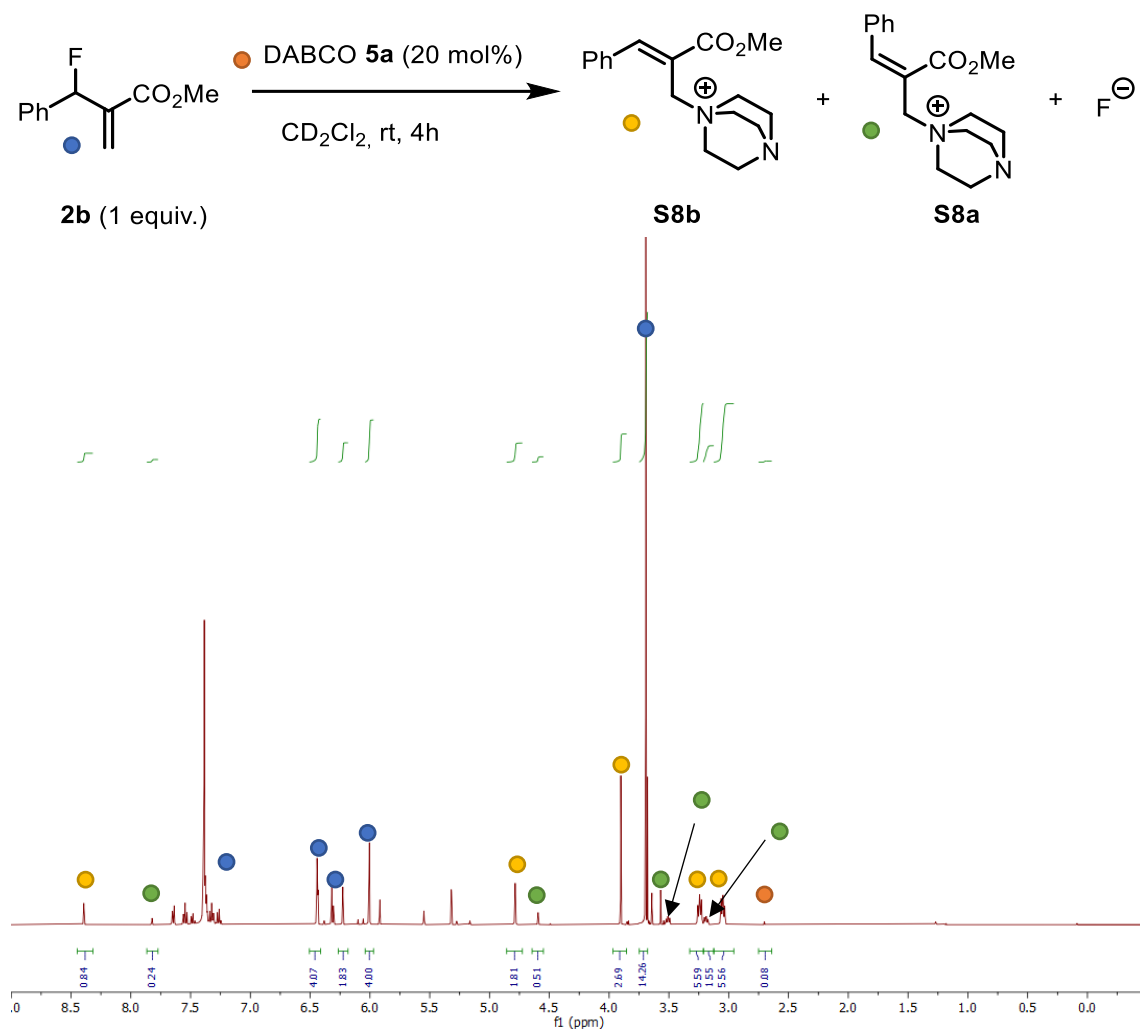

**Figure S18.**  $^1\text{H}$  NMR spectrum at 500 MHz NMR field in  $\text{CD}_2\text{Cl}_2$  for the formation of the catalytic species using 20 mol% of DABCO **5a** and 1 equiv. of allyl fluoride **2b**.

[In this experiment, the utilization of catalytic amounts of DABCO **5a** (orange bubble) leads to the formation of a 1 to 3.5 mixture of the Z- and E- isomers **S8a** and **S8b** (green and yellow bubbles respectively) of the catalytic species while observing an 80% of the unreacted allyl fluoride **2b** (blue bubbles) after 4h.]

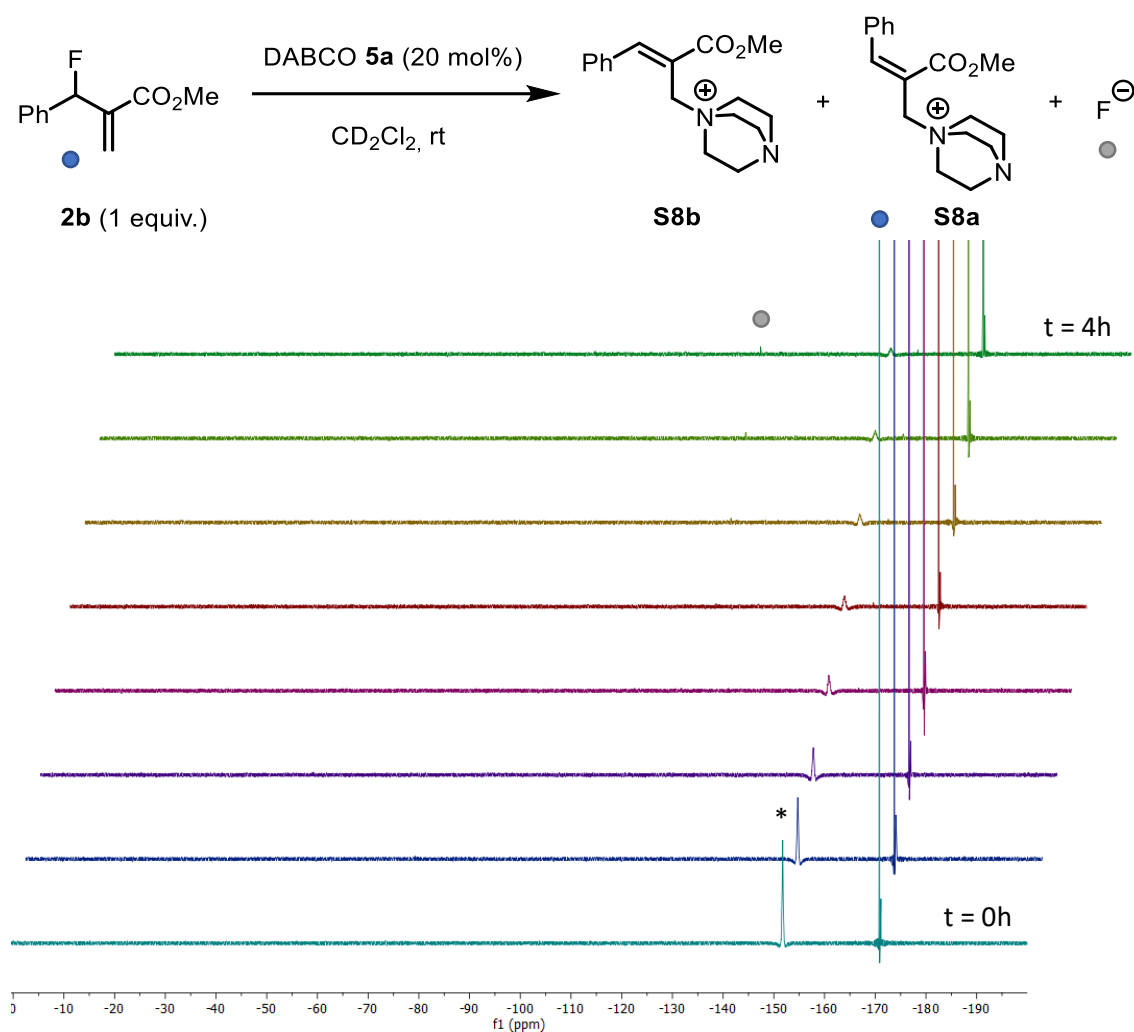

**Figure S19.**  $^{19}\text{F}\{^1\text{H}\}$  NMR spectra at 470 MHz NMR field in  $\text{CD}_2\text{Cl}_2$  for the formation of the catalytic species using 20 mol% of DABCO **5a** and 1 equiv. of allyl fluoride **2b** over 4h.

[In this experiment, the utilization of catalytic amounts of DABCO **5a** in the absence of a competitive fluorophilic trap leads to the formation of naked fluoride (grey bubble, at  $-126.91\text{ ppm}$ ), which matches with the  $^{19}\text{F}\{^1\text{H}\}$  NMR of an ammonium fluoride, such as TBAF. (The signal marked with \* at  $-151\text{ ppm}$  is an artifact.<sup>13</sup>)]

**F.5. Generation of the catalytic species with (DHQD)<sub>2</sub>PHAL – Using 20 mol% of (DHQD)<sub>2</sub>PHAL and allyl carbonates**

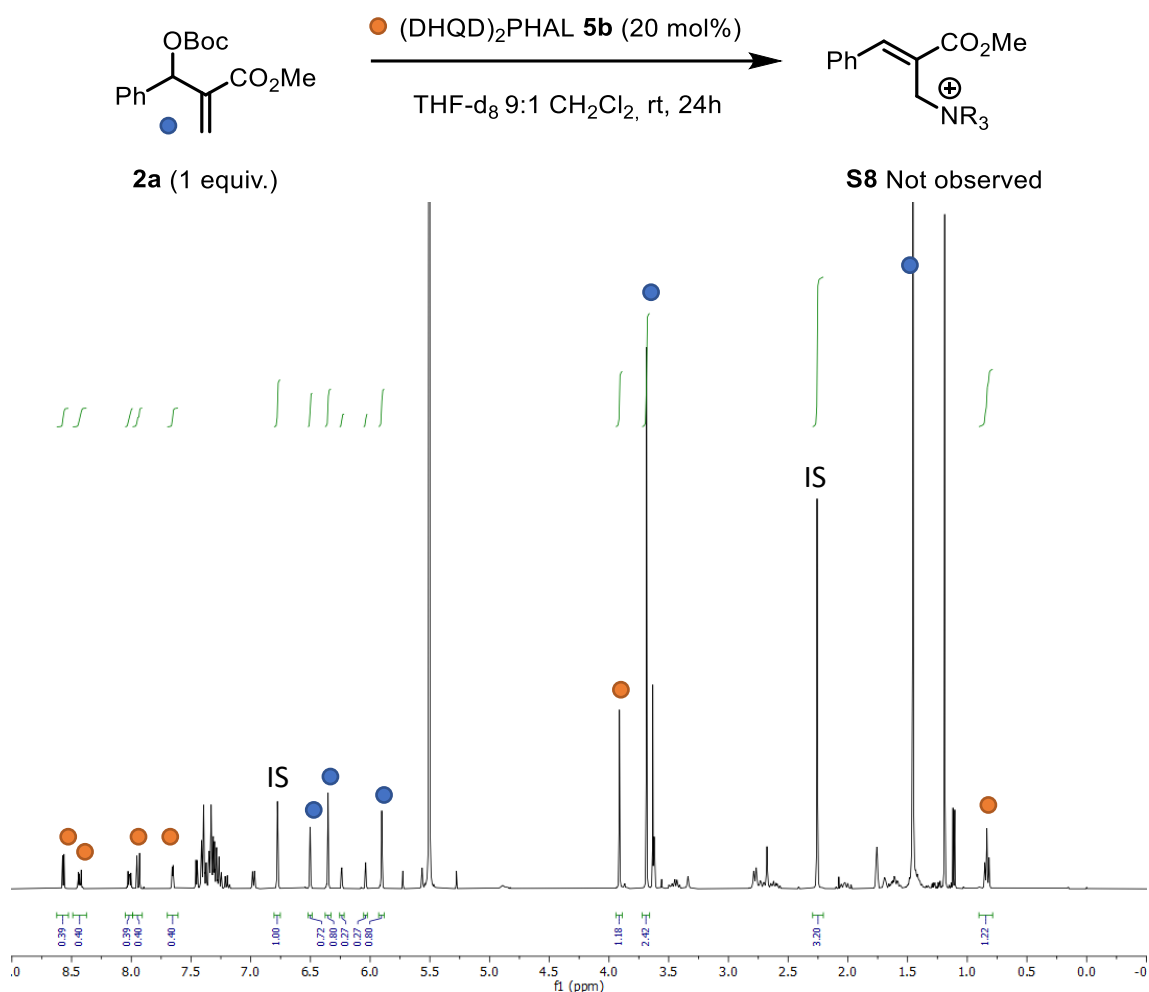

**Figure S20.** <sup>1</sup>H NMR spectrum at 500 MHz NMR field in THF-d<sub>8</sub>:CD<sub>2</sub>Cl<sub>2</sub> (9:1) for the formation of the catalytic species using 20 mol% of (DHQD)<sub>2</sub>PHAL **5b** and 1 equiv. of allyl carbonate **2a**.

[The utilization of catalytic amounts of (DHQD)<sub>2</sub>PHAL **5b** (orange bubble) does not lead to the observation of the catalytic species **S8** after 24 h at room temperature. Moreover, 80% of the unreacted allyl carbonate **2a** (blue bubbles) is still present in the reaction mixture.]

**F.6. Generation of the catalytic species with (DHQD)<sub>2</sub>PHAL – Using 20 mol% of (DHQD)<sub>2</sub>PHAL and allyl fluorides**

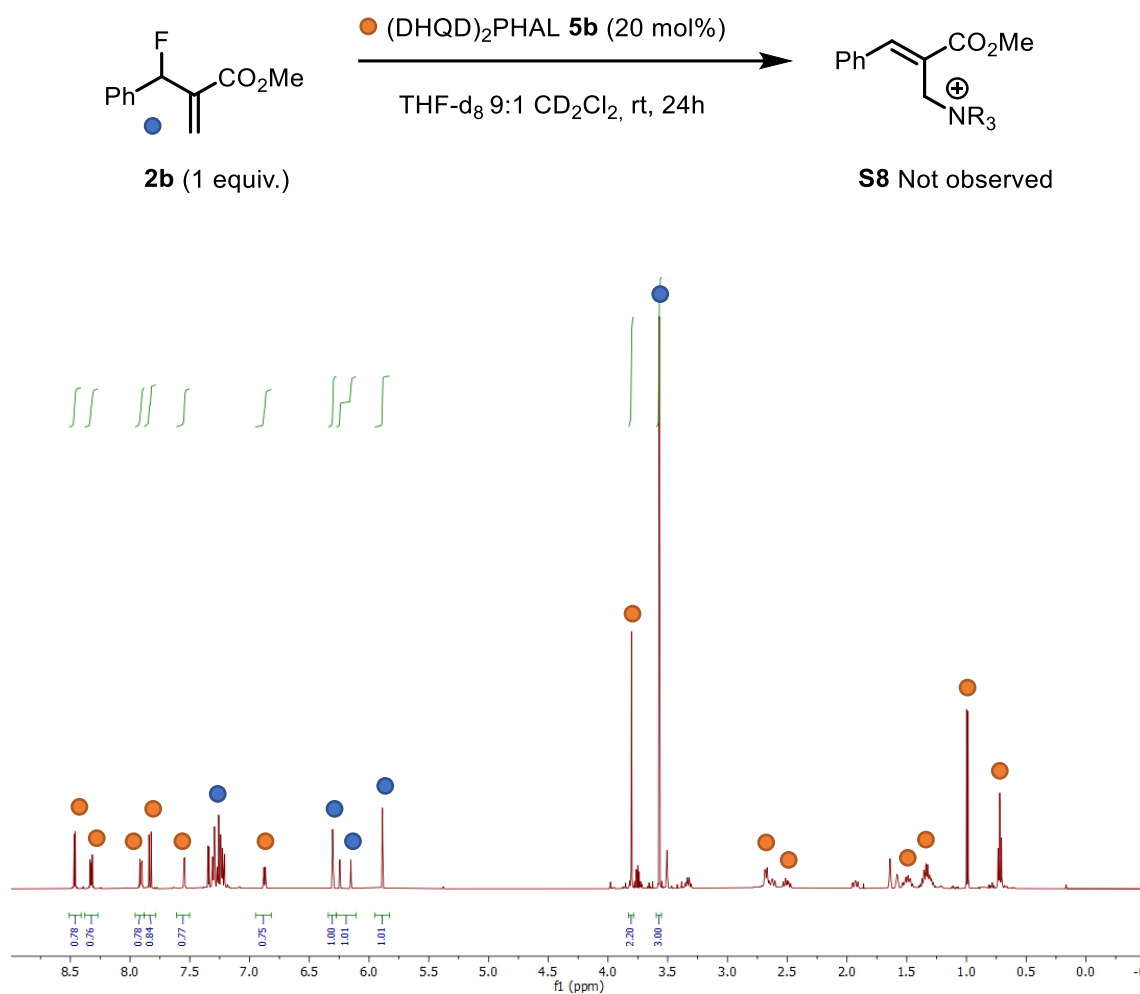

**Figure S21.** <sup>1</sup>H NMR spectrum at 500 MHz NMR field in THF-d<sub>8</sub>:CD<sub>2</sub>Cl<sub>2</sub> (9:1) for the formation of the catalytic species using 20 mol% of (DHQD)<sub>2</sub>PHAL **5b** and 1 equiv. of allyl fluoride **2b**.

[The utilization of catalytic amounts of (DHQD)<sub>2</sub>PHAL **5b** (orange bubble) does not lead to the observation of the catalytic species **S8** after 24 h at room temperature.]

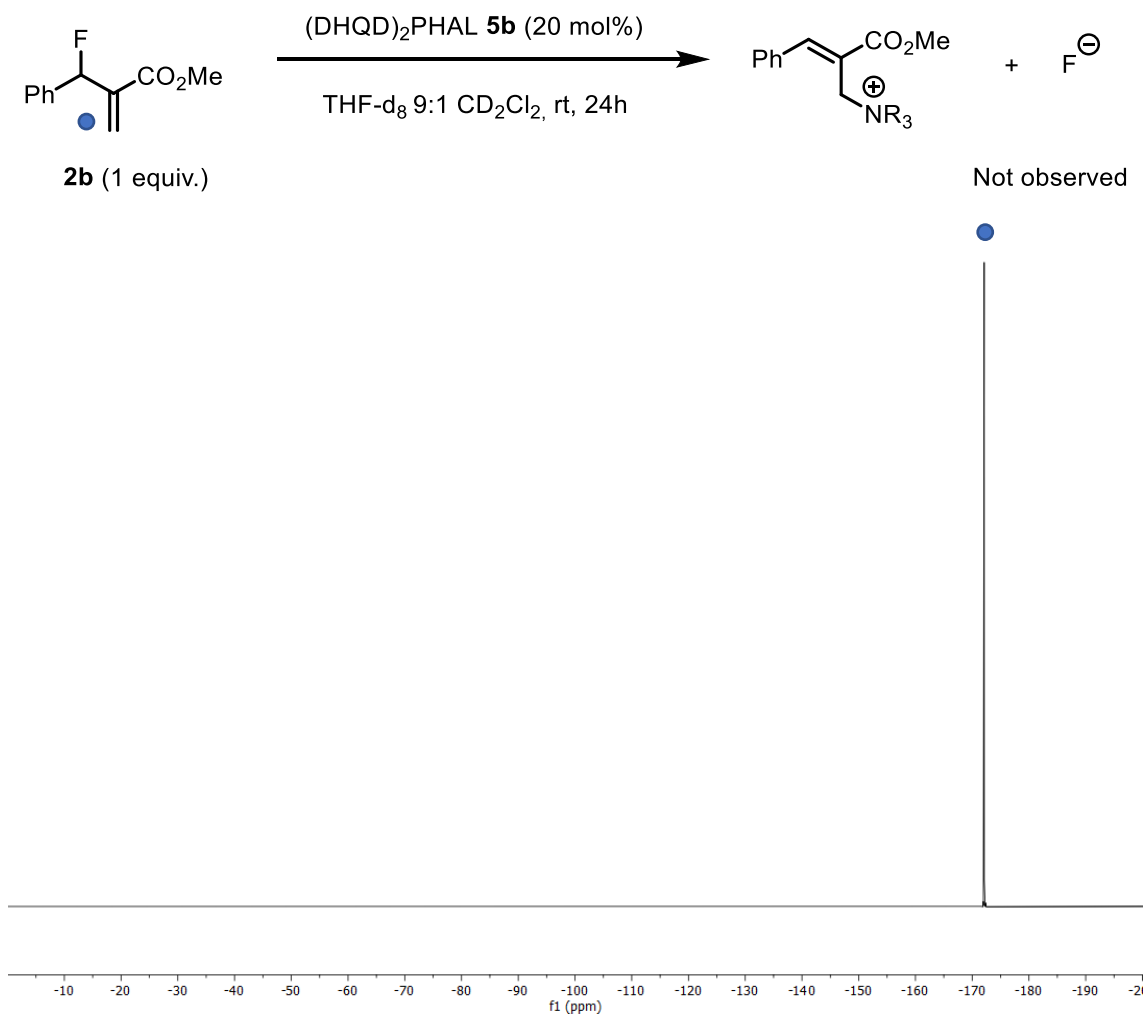

**Figure S22.** <sup>19</sup>F {<sup>1</sup>H} NMR spectrum at 470 MHz NMR field in THF-d<sub>8</sub>:CD<sub>2</sub>Cl<sub>2</sub> (9:1) for the formation of fluoride using 20 mol% of (DHQD)<sub>2</sub>PHAL **5b** and 1 equiv. of allyl fluoride **2b**.

*[The utilization of catalytic amounts of (DHQD)<sub>2</sub>PHAL **5b** does not lead to the observation of fluoride after 24 h at room temperature.]*

## G. Control experiments

### General procedures

**A** - The corresponding allylic substrate (1 equiv., 0.1 mmol) was weighted into an NMR tube and dissolved with 0.5 mL of the corresponding deuterated solvent (0.2 M). Subsequently, the corresponding ketone/enol ether (3 equiv., 0.3 mmol) and the corresponding amount of catalyst were added (as stated in every example). To ensure homogeneous NMR samples, the tube was initially sonicated 1 min.

**B** - The corresponding allylic substrate (1 equiv., 0.1 mmol) was weighted into a 5 mL vial equipped with a magnetic stirring bar and dissolved with 0.5 mL of the corresponding solvent (0.2 M). Subsequently, the corresponding ketone/enol ether (3 equiv., 0.3 mmol), reagent TBAF or LiClO<sub>4</sub> (if needed) and a 10/20 mol% of catalyst were added. The reaction mixture was stirred at room temperature until the extraction of a 50  $\mu$ L aliquot. The reaction aliquot was dried under vacuum pressure in a vial, where it was added 50  $\mu$ L of a 0.2 M solution of 1,3,5-trimethoxybenzene in CDCl<sub>3</sub>. The resulting mixture was diluted with more CDCl<sub>3</sub> and was transferred into an NMR tube.

**G.1. Control experiments – Utilization of different leaving groups in the allylic position with cyclic ketones and DABCO**

**Allyl carbonate in the presence of a cyclic ketone**

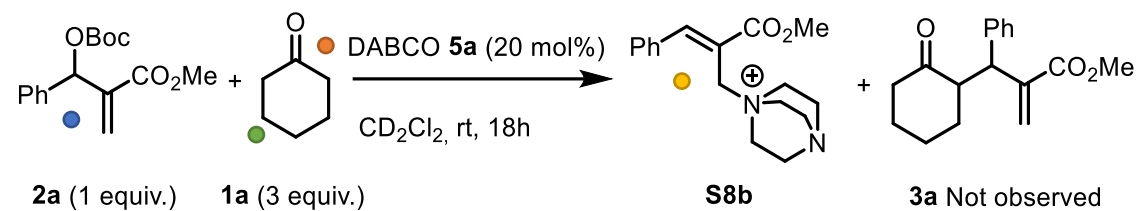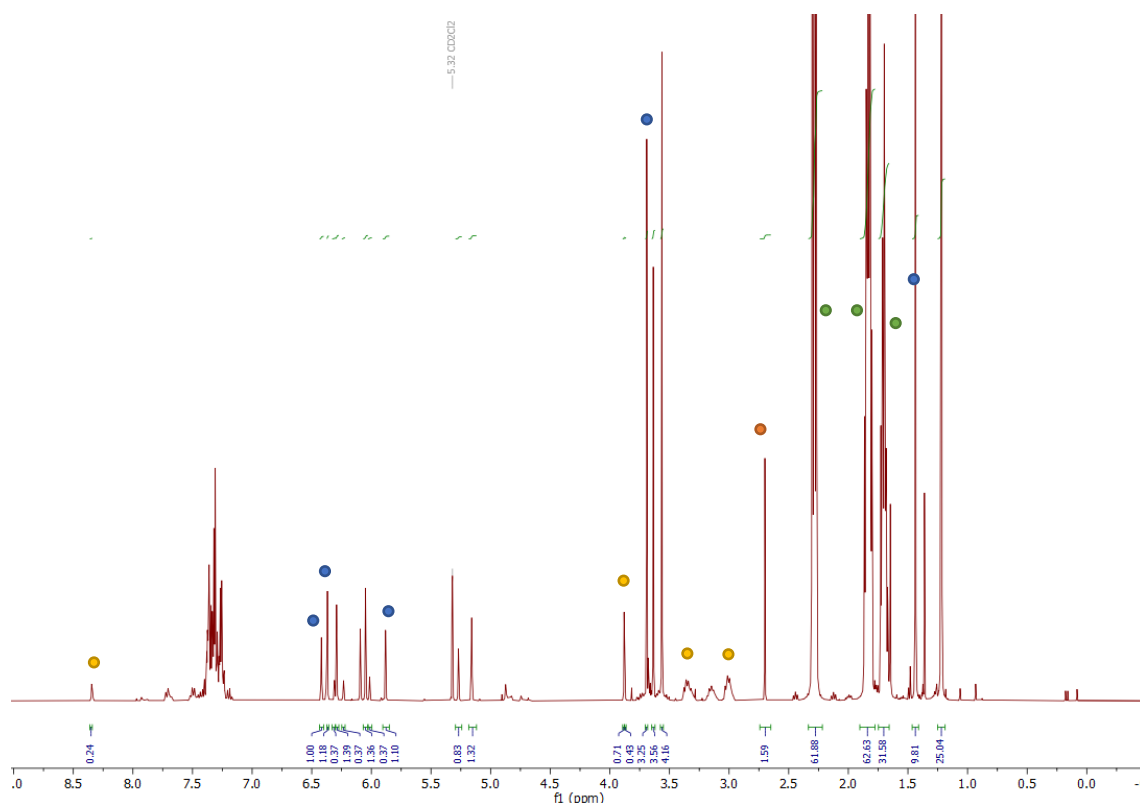

**Figure S23.**  $^1\text{H}$  NMR spectrum at 500 MHz NMR field in  $\text{CD}_2\text{Cl}_2$  of the reaction crude.

[In this experiment, the utilization of catalytic amounts of DABCO **5a** (orange bubble) leads to the formation of the *E*- isomer **S8b** (yellow bubbles) of the catalytic species when allyl carbonate **2a** is used. However, even if the starting material **2a** is consumed (blue bubbles), the product **3a** is not observed.]

This experiment highlights the need of a competent enol nucleophile for the reaction to proceed.

*Allyl acetate in the presence of a cyclic ketone*

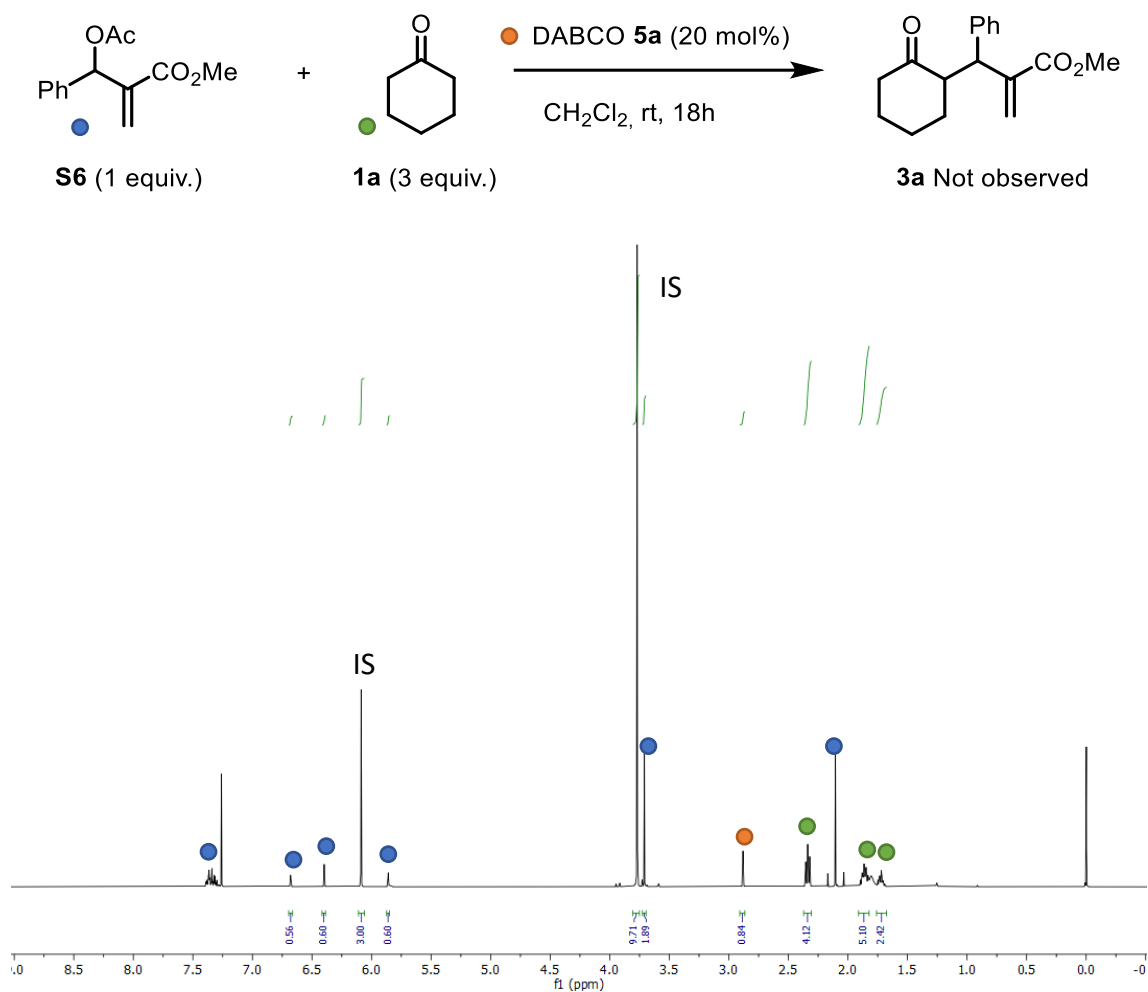

**Figure S24.** <sup>1</sup>H NMR spectrum at 500 MHz NMR field in CD<sub>2</sub>Cl<sub>2</sub> of the reaction crude.

[The utilization of catalytic amounts of **DABCO 5a** (orange bubble) **does not lead** to the observation of the catalytic species when allyl acetate **S6** is used. Additionally, the starting material **S6** is not consumed (blue bubbles) thus the product **3a** is not observed.]

This experiment highlights the **need of a reactive allyl derivative** as well as a competent enol nucleophile for the reaction to proceed.

*Allyl fluoride in the presence of a cyclic ketone*

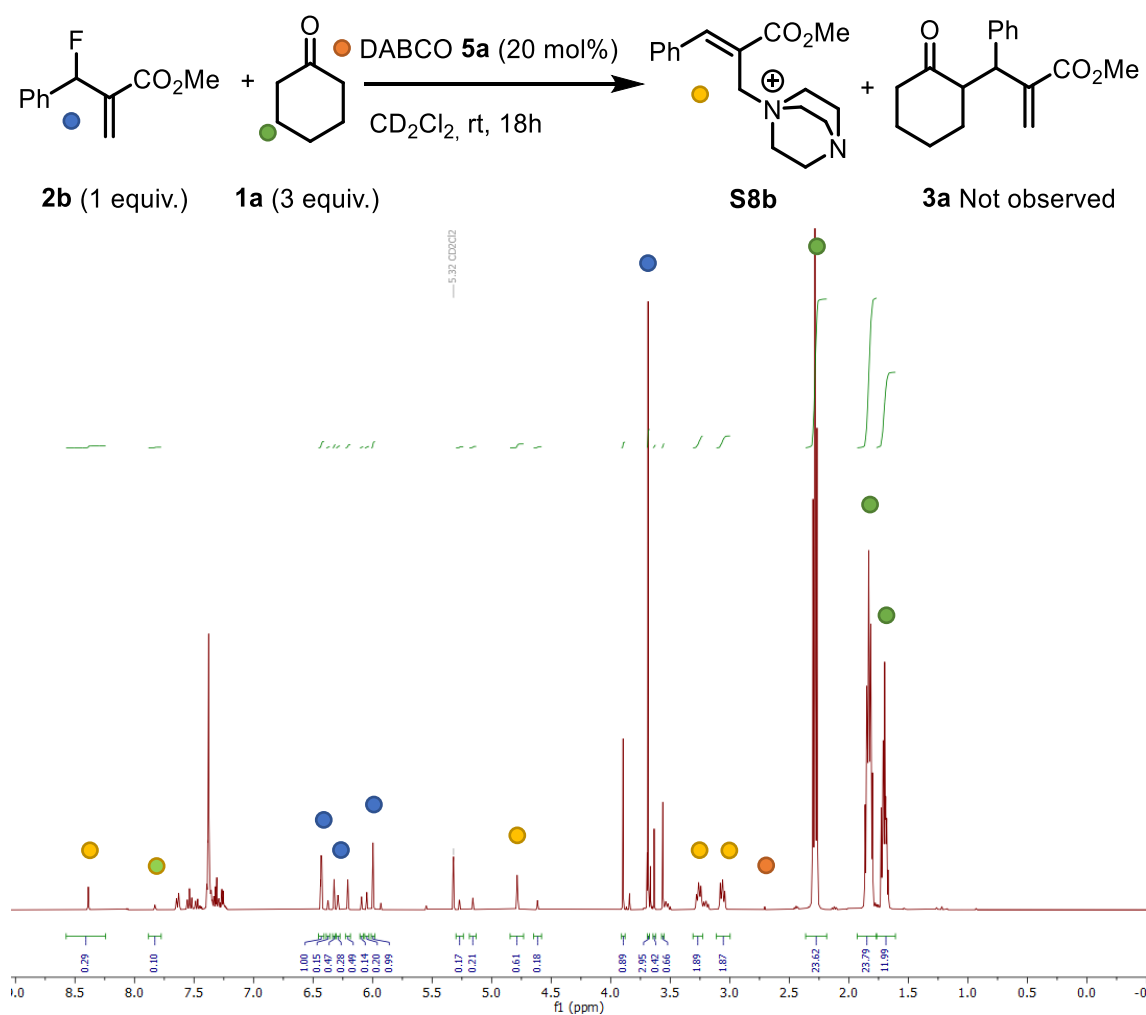

**Figure S25.**  $^1\text{H}$  NMR spectrum at 500 MHz NMR field in  $\text{CD}_2\text{Cl}_2$  of the reaction crude.

[The utilization of catalytic amounts of DABCO **5a** (orange bubble) **leads to** the formation of a 1 to 3 mixture of the Z- and E- isomers **S8** (light green and yellow bubbles) of the catalytic species in the presence of allyl fluoride **2b**. However, even if the starting material **2b** is consumed (blue bubbles), the product **3a** is not observed.]

This experiment highlights the **need of a competent enol nucleophile** for the reaction to proceed.

**G.2. Control experiments – Utilization of different leaving groups in the allylic position with cyclic ketones and (DHQD)<sub>2</sub>PHAL**

**Allyl carbonate in the presence of a cyclic ketone**

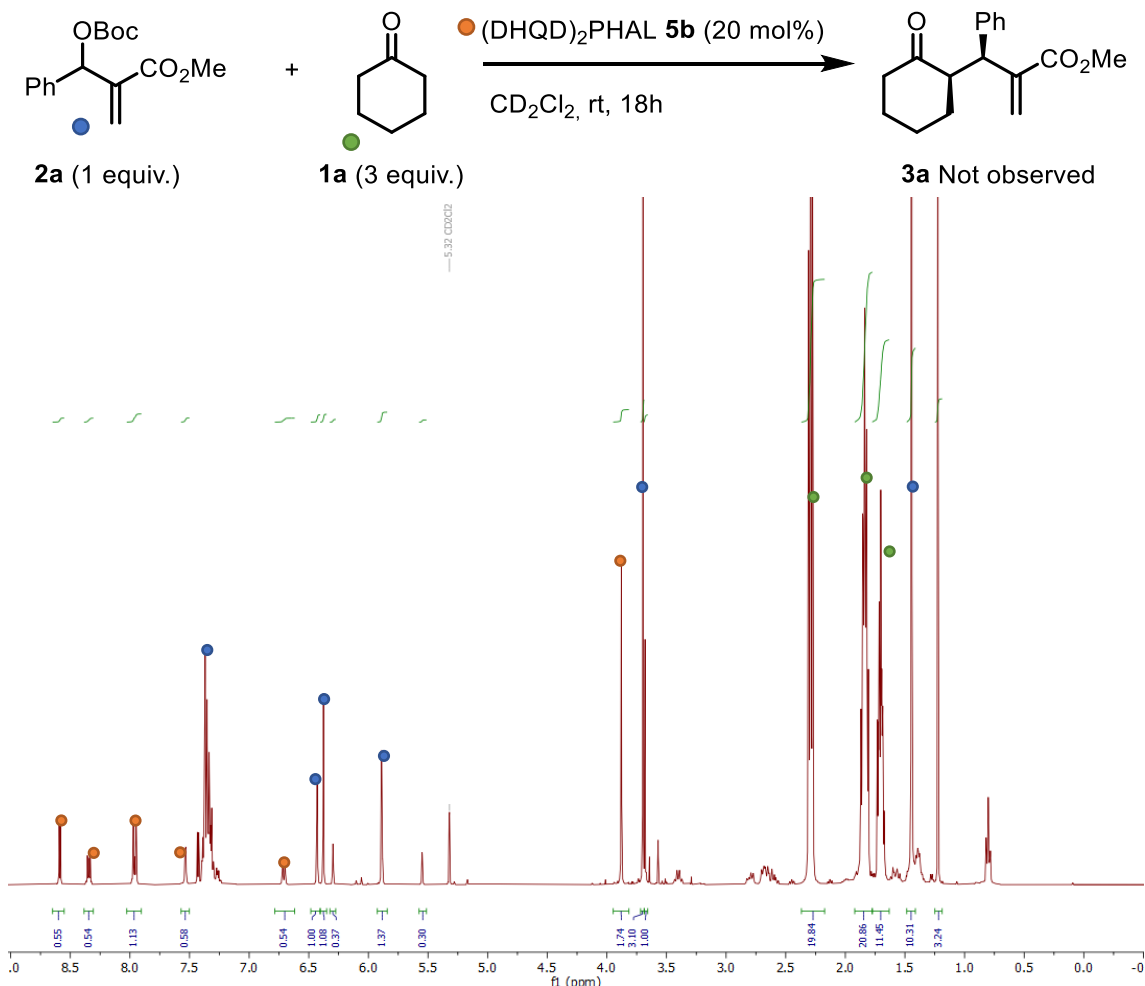

**Figure S26.** <sup>1</sup>H NMR spectrum at 500 MHz NMR field in CD<sub>2</sub>Cl<sub>2</sub> of the reaction crude.

[In this experiment, the utilization of catalytic amounts of (DHQD)<sub>2</sub>PHAL **5b** (orange bubble) **does not lead** to the observation of the catalytic species. Additionally, the starting material **2a** is not consumed (blue bubbles) nor the product **3a** observed.]

This experiment highlights the **need of a competent enol nucleophile** for the reaction to proceed.

*Allyl fluoride in the presence of a cyclic ketone*

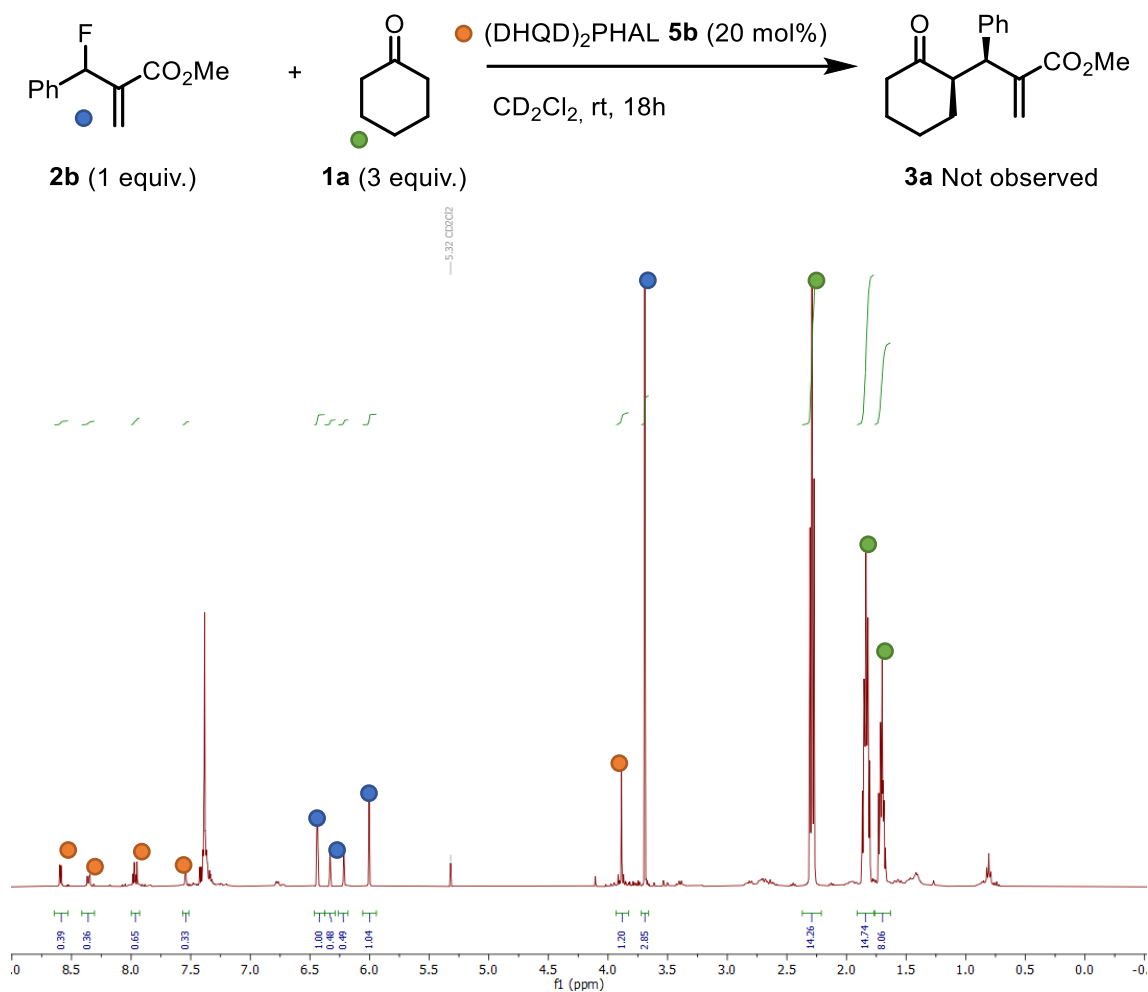

**Figure S27.** <sup>1</sup>H NMR spectrum at 500 MHz NMR field in CD<sub>2</sub>Cl<sub>2</sub> of the reaction crude.

[In this experiment, the utilization of catalytic amounts of (DHQD)<sub>2</sub>PHAL **5b** (orange bubble) **does not lead** to the observation of the catalytic species. Additionally, the starting material **2b** is not consumed (blue bubbles) nor the product **3a** observed.]

This experiment highlights the **need of a competent enol nucleophile** for the reaction to proceed.

**G.3. Control experiments – Utilization of different enol derivatives with allyl fluorides and DABCO**

**Allyl fluoride in the presence of a cyclic enol carbonate**

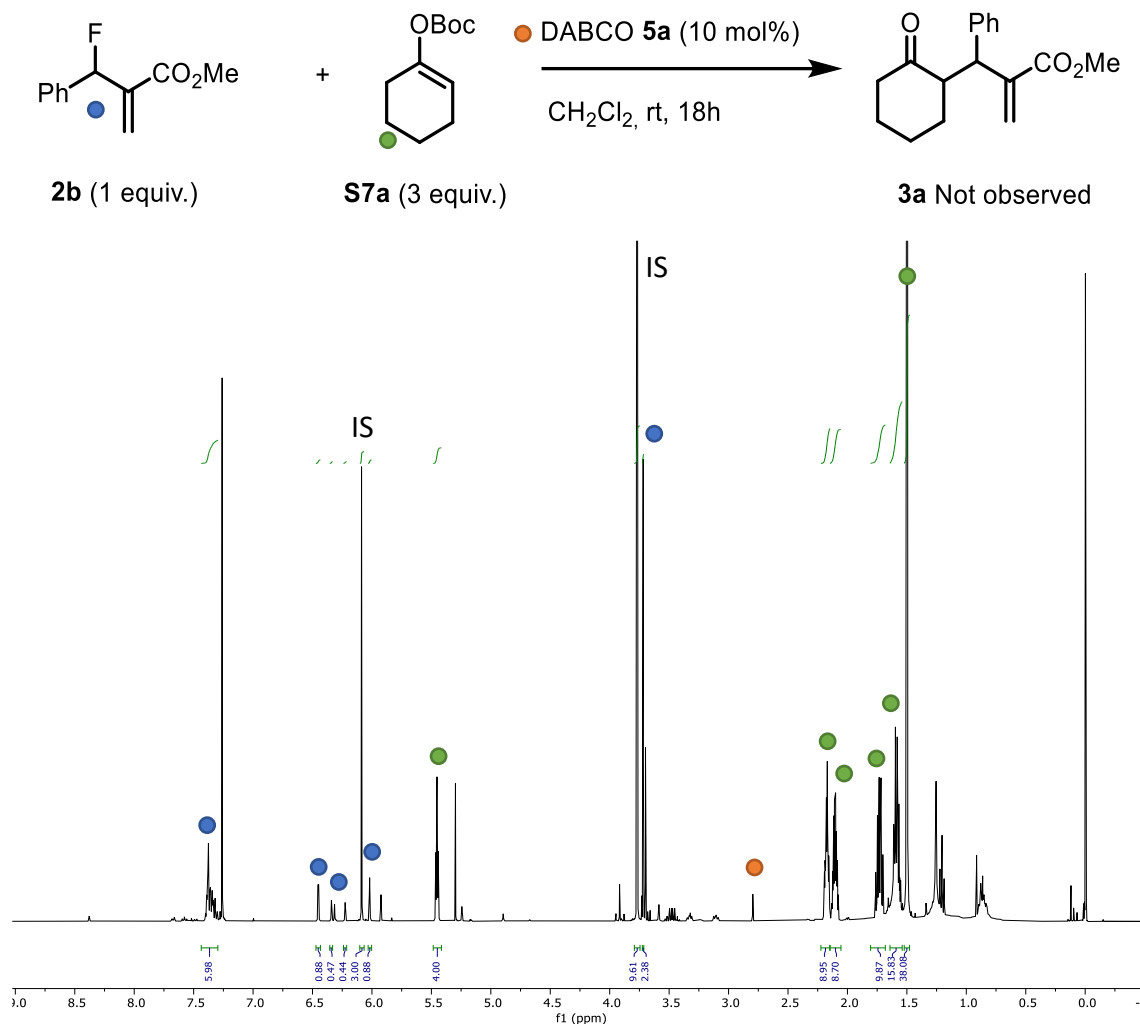

**Figure S28.**  $^1\text{H}$  NMR spectrum at 500 MHz NMR field in  $\text{CDCl}_3$  of the reaction crude.

[In this experiment, the utilization of catalytic amounts of DABCO **5a** (orange bubble) **does not lead** to the observation of the catalytic species. Additionally, the starting material **2b** nor the enol carbonate **S7a** are consumed (blue and green bubbles respectively). In consequence, the product **3a** is not observed.]

This experiment highlights the need of a competent fluorophilic enol derivative for the reaction to proceed.

*Allyl fluoride in the presence of a cyclic enol acetate*

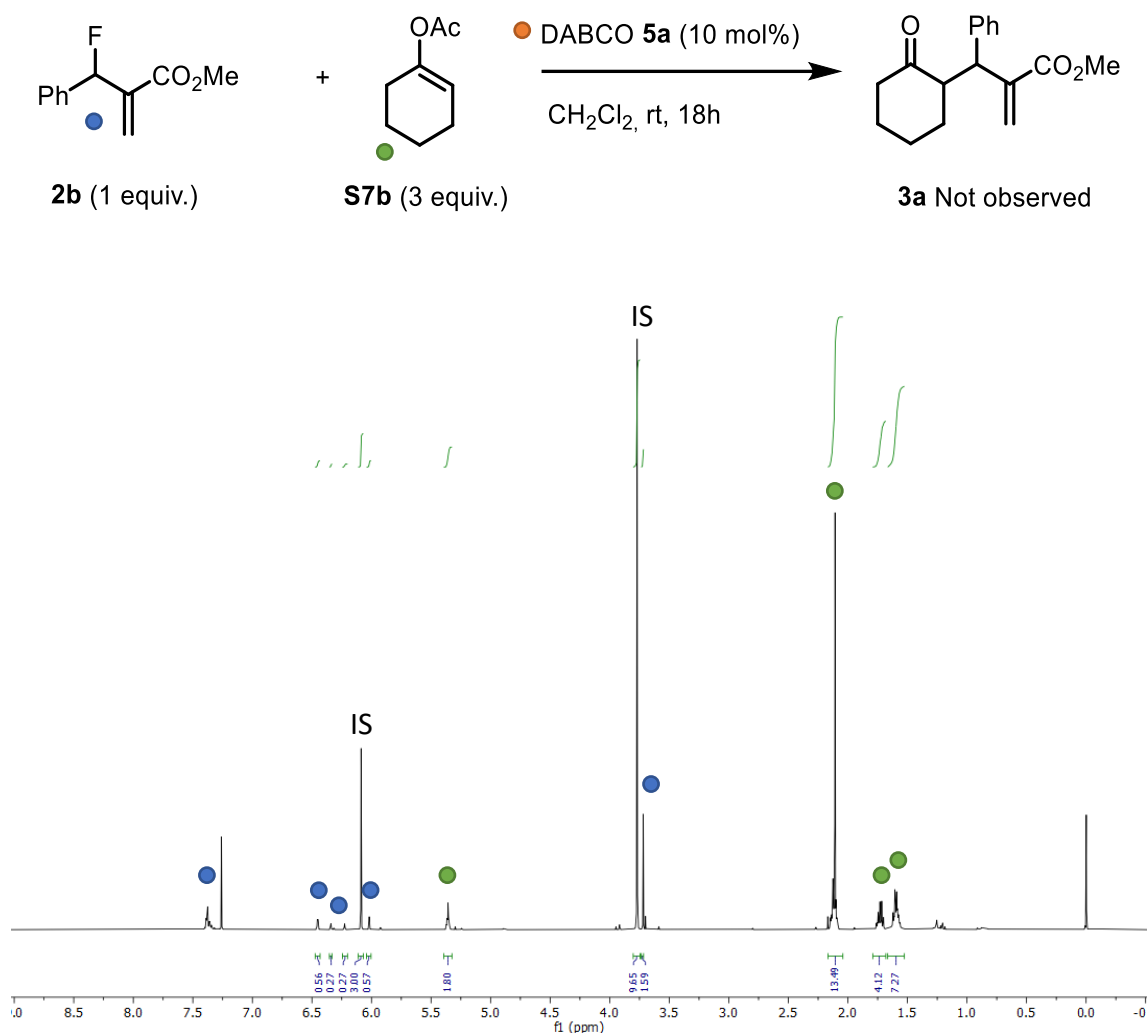

**Figure S29.** <sup>1</sup>H NMR spectrum at 500 MHz NMR field in  $\text{CDCl}_3$  of the reaction crude.

[In this experiment, the utilization of catalytic amounts of DABCO **5a** (orange bubble) **does not lead to** the observation of the catalytic species. Additionally, the starting material **2b** nor the enol acetate **S7b** are consumed (blue and green bubbles respectively). In consequence, the product **3a** is not observed.]

This experiment highlights **the need of a competent fluorophilic enol derivative** for the reaction to proceed.

#### G.4. Control experiments – Utilization of enol carbonates with allyl fluorides and DABCO

##### Carbonate in the presence of a cyclic silyl enol ether

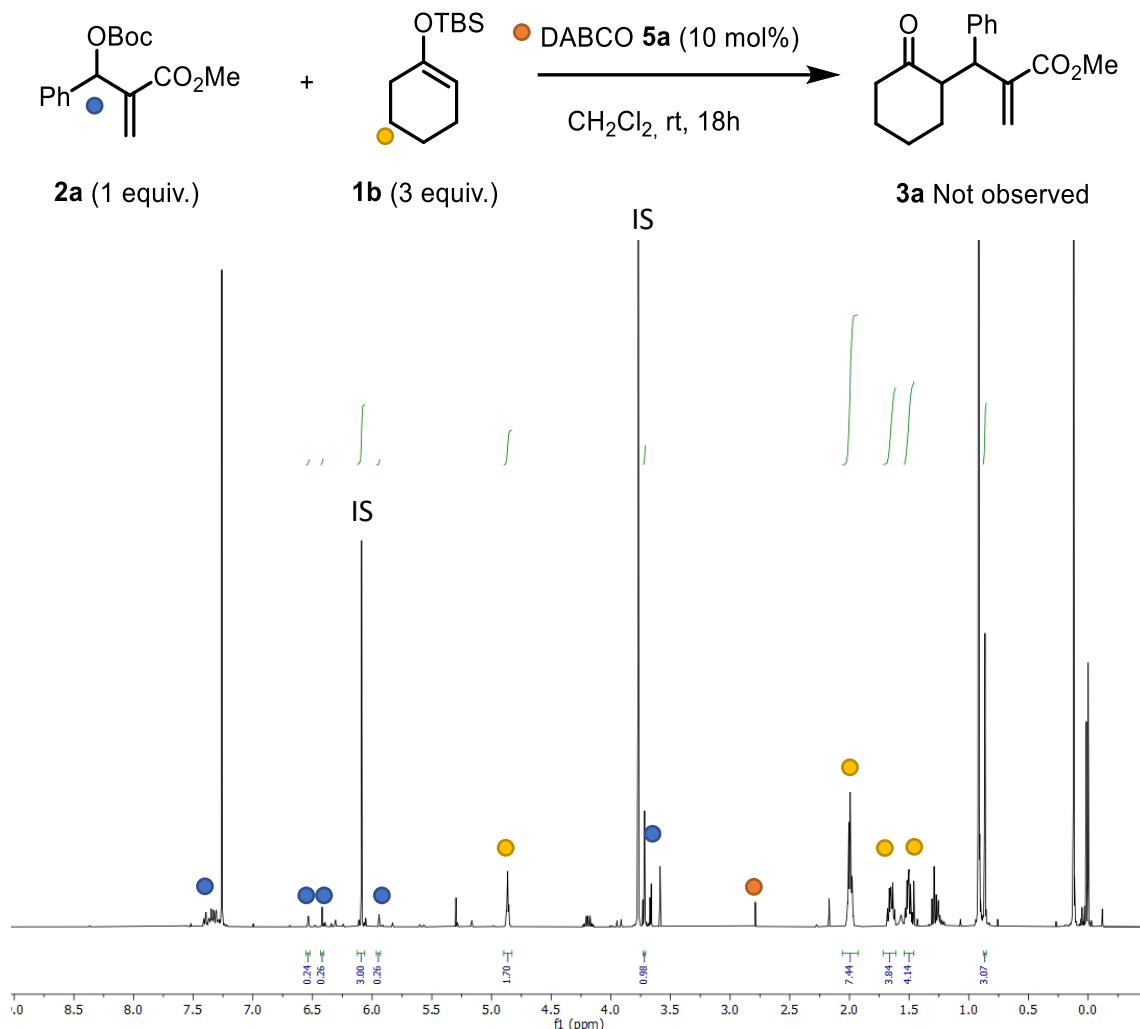

**Figure S30.**  $^1\text{H}$  NMR spectrum at 500 MHz NMR field in  $\text{CDCl}_3$  of the reaction crude.

[In this experiment, the utilization of catalytic amounts of DABCO **5a** (orange bubble) **does not lead to the observation of the catalytic species**. Additionally, the limiting allyl carbonate **2a** nor the silyl enol ether **1b** are consumed (blue and yellow bubbles respectively). In consequence, the product **3a** is not observed.]

This experiment highlights **the need of a fluoride-mediated activation** of the silyl enol ether for the reaction to proceed.

### G.5. Control experiments – Activation of silyl enol ethers with external fluoride sources

#### *Allyl fluoride in the presence of a cyclic silyl enol ether and TBAF (without catalyst)*

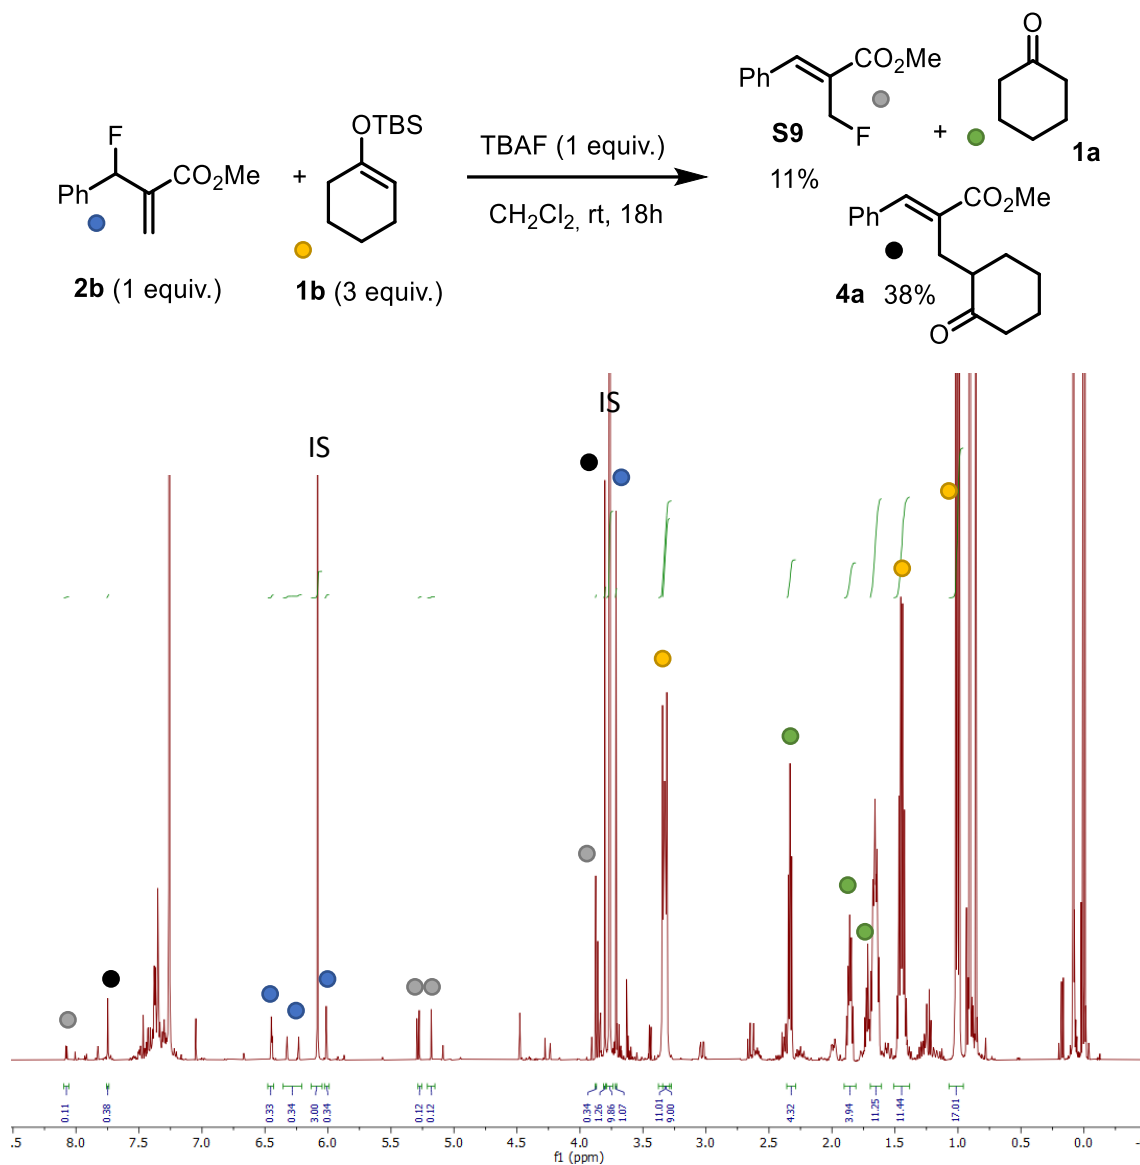

**Figure S31.** <sup>1</sup>H NMR spectrum at 500 MHz NMR field in CDCl<sub>3</sub> of the reaction crude.

[In this experiment, **the absence of a Lewis base prevents the elimination of fluoride from the allyl fluoride **2b****. However, the addition of **an external source of fluoride (TBAF, 1 equiv.)** leads to the activation of the silyl enol ether. For this reason, a **complex mixture of different regioisomers** is observed. On the one hand, the regioisomer of starting material **2b** is observed in 11 % yield (grey bubbles). On the other hand, the regioisomer of the product **4a** is observed in 38% yield (black bubbles).]

This experiment highlights the need of a controlled release of fluoride in order to ensure high regioselectivities in the reaction.

*Allyl carbonate in the presence of a cyclic silyl enol ether and TBAF (with catalytic DABCO)*

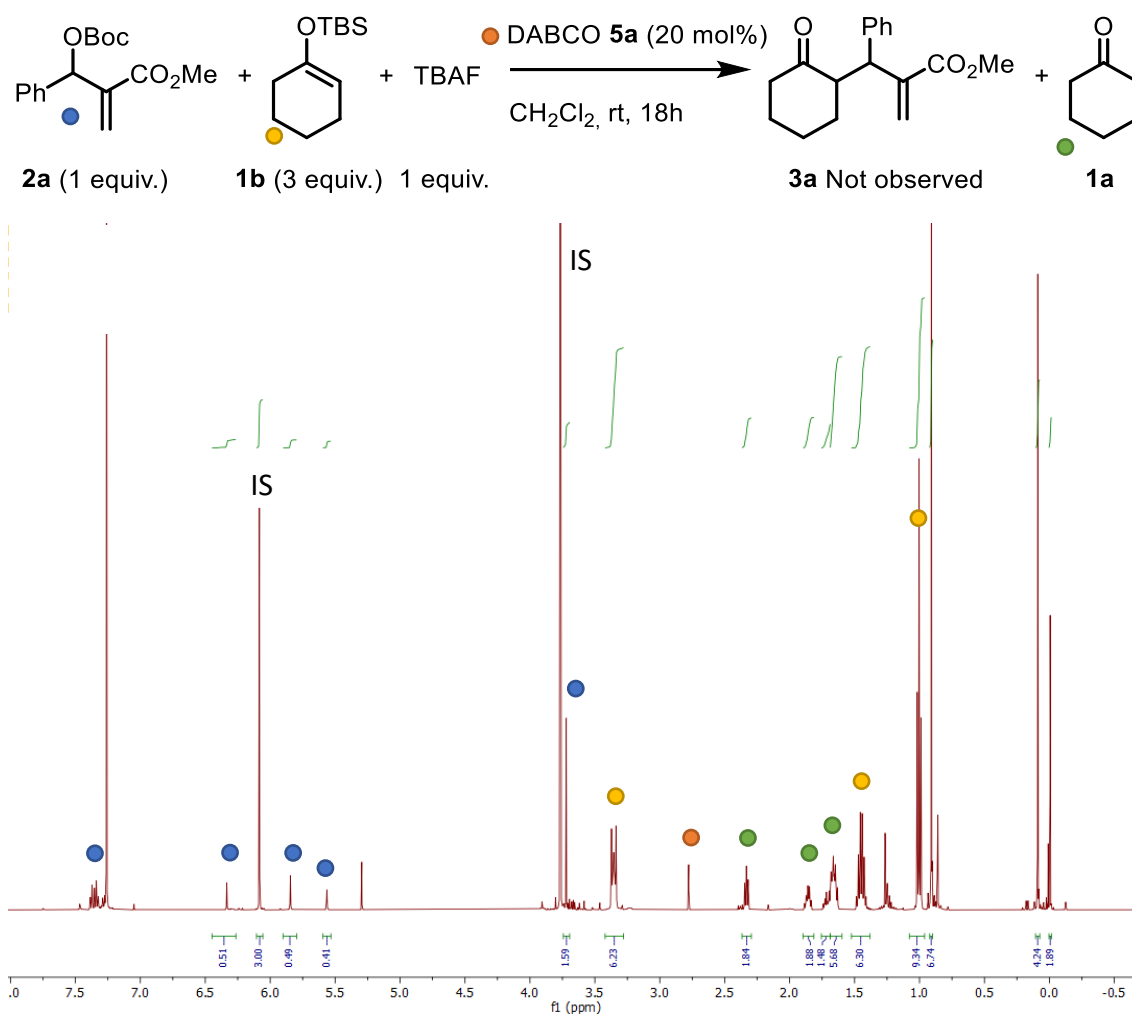

**Figure S32.**  $^1\text{H}$  NMR spectrum at 500 MHz NMR field in  $\text{CDCl}_3$  of the reaction crude.

*[In this experiment, the presence of a Lewis base such as DABCO **5b** (20 mol%, orange bubble) in combination with an external source of fluoride (TBAF, 1 equiv.) does not yield product **3a**.]*

*This experiment highlights that both the formation of the ammonium catalytic species together with the enolate of the cyclohexanone do not guarantee suitable reactivity.*

*Allyl fluoride in the presence of a cyclic silyl enol ether and TBAF (with catalytic DABCO)*

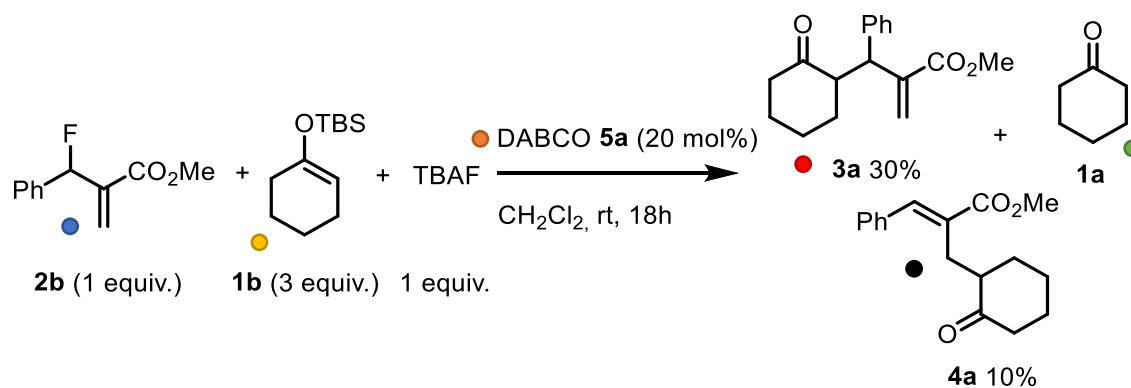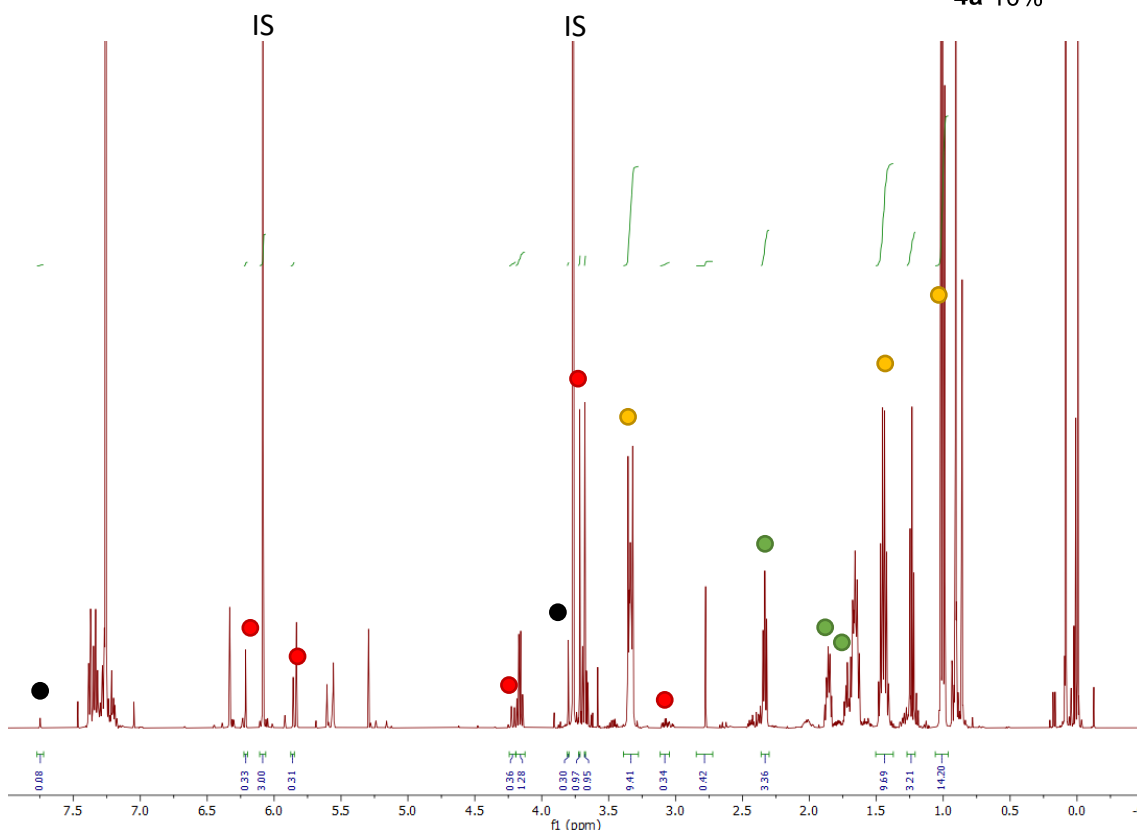

**Figure S33.**  $^1\text{H}$  NMR spectrum at 500 MHz NMR field in  $\text{CDCl}_3$  of the reaction crude.

[In this experiment, **the presence of a Lewis base** such as DABCO (20 mol%, orange bubble) in combination with **an external source of fluoride** (TBAF, 1 equiv.) while using allyl fluorides triggers the formation of complex reaction mixtures. Additionally, full conversion of the starting material **2b** is observed (blue bubbles) yielding **complex mixture of regioisomers**. On one side, product **3a** is observed in a modest 30 % yield (red bubbles). At the same time, the product regioisomer **4a** is observed in 10% yield (black bubbles).]

This experiment highlights **the need of a controlled release of fluoride** in order to ensure high regioselectivities in the reaction.

*Allyl carbonate in the presence of a cyclic silyl enol ether and TBAF (with catalytic (DHQD)<sub>2</sub>PHAL)*

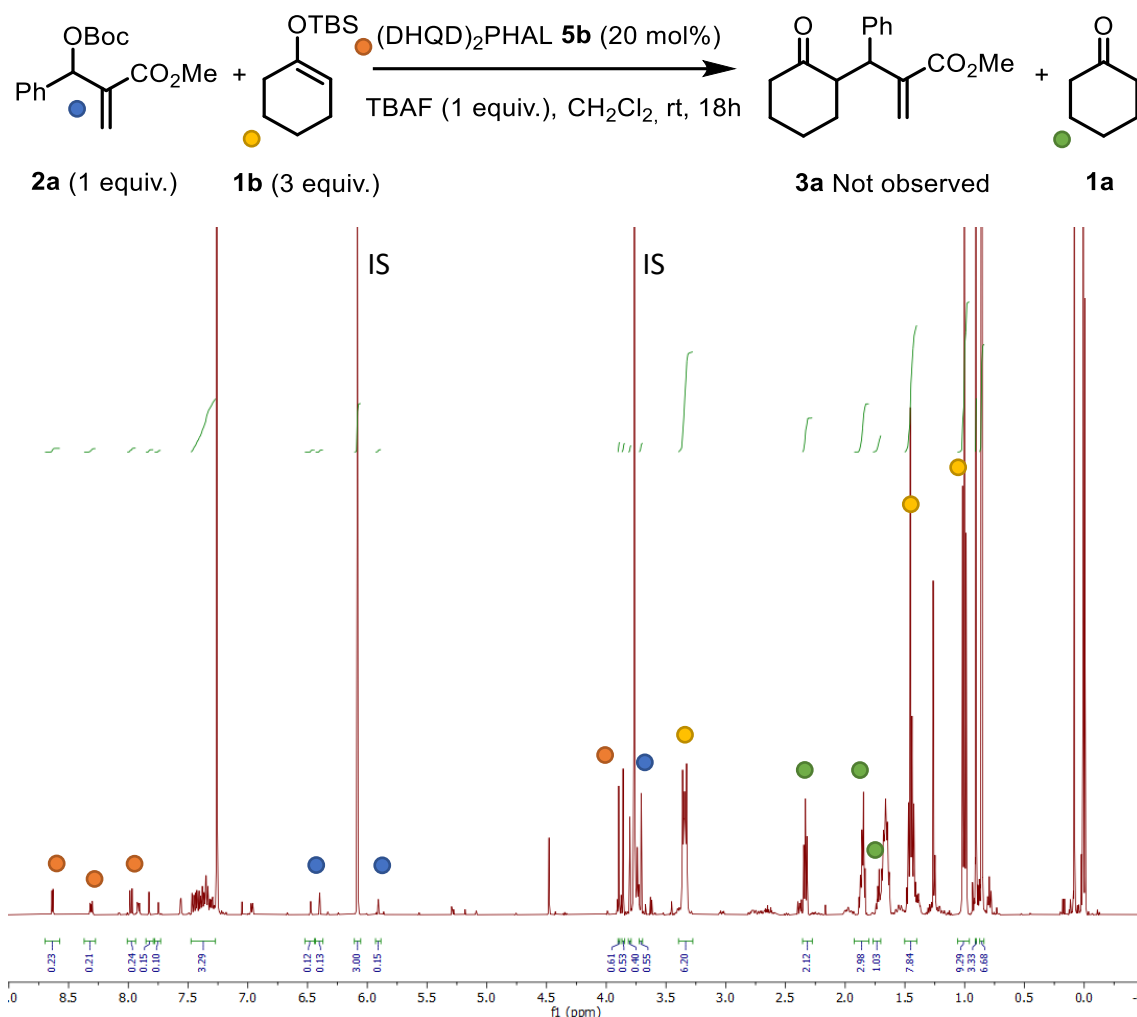

**Figure S34.** <sup>1</sup>H NMR spectrum at 500 MHz NMR field in CDCl<sub>3</sub> of the reaction crude.

[In this experiment, **the presence of a chiral Lewis base** such as (DHQD)<sub>2</sub>PHAL **5b** (20 mol%, orange bubble) in combination with **an external source of fluoride** (TBAF, 1 equiv.) prevents the formation of complex reaction mixtures. Additionally, no conversion of the starting allyl carbonate **2a** is observed.]

This experiment highlights **the need of low concentrations of naked fluoride in the reaction media** to ensure the reaction to proceed.

*Allyl fluoride in the presence of a cyclic silyl enol ether and TBAF (with catalytic (DHQD)<sub>2</sub>PHAL)*

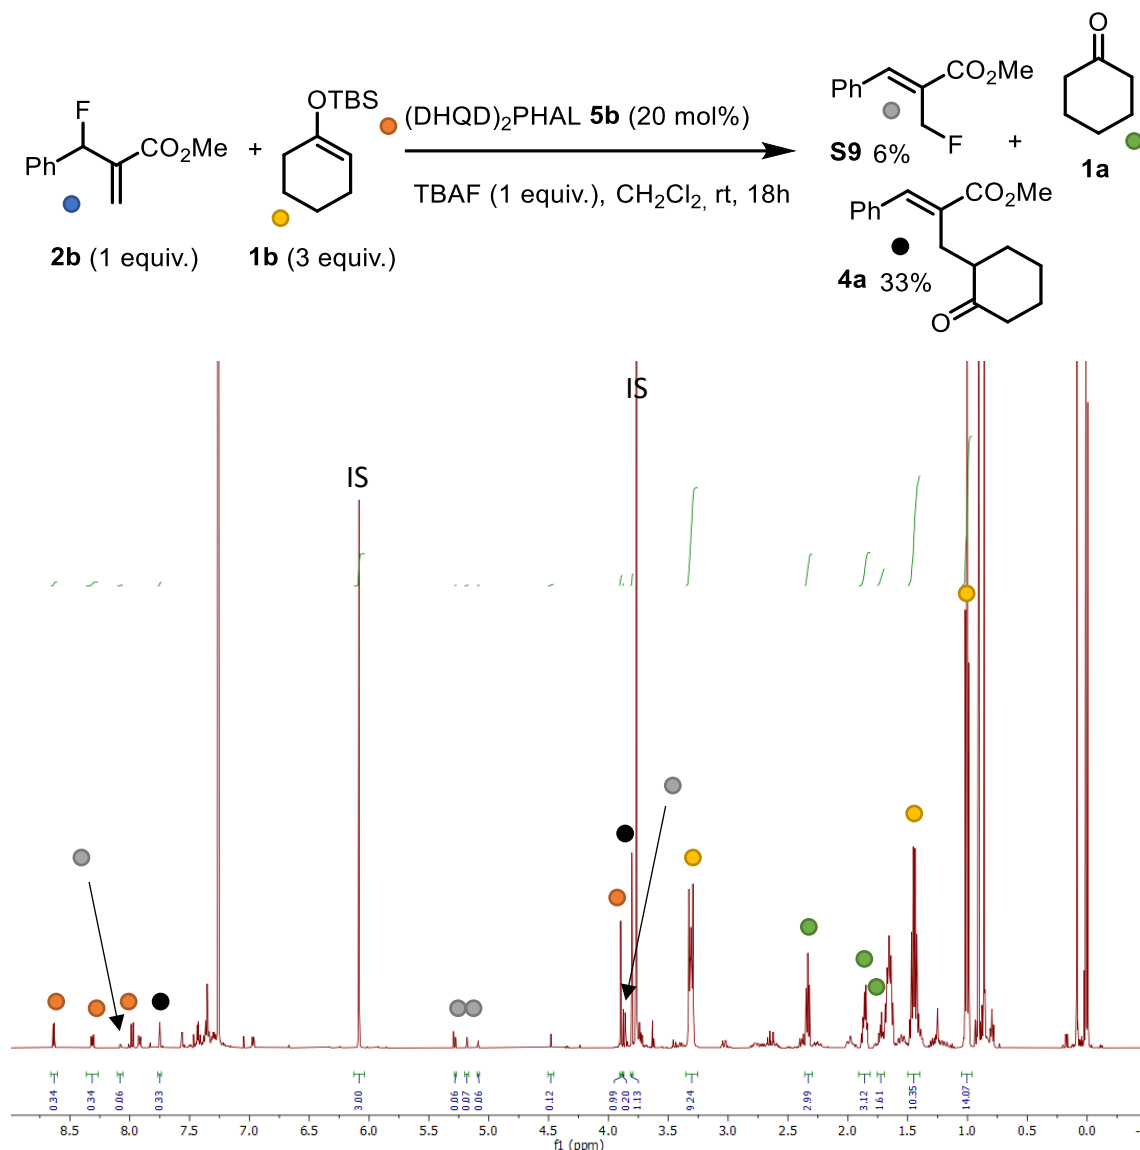

**Figure S35.** <sup>1</sup>H NMR spectrum at 500 MHz NMR field in CDCl<sub>3</sub> of the reaction crude.

[In this experiment, **the presence of a chiral Lewis base** such as (DHQD)<sub>2</sub>PHAL **5b** (20 mol%, orange bubble) in combination with **an external source of fluoride** (TBAF, 1 equiv.) while using allyl fluorides triggers the formation of complex reaction mixtures. Additionally, full conversion of the starting material **2b** is observed (blue bubbles) yielding **complex mixture of by-products**. On the one hand, the regioisomer of starting material **S9** is observed in 6 % yield (grey bubbles). On the other hand, the regioisomer of the product **4a** is observed in 33% yield (black bubbles).]

This experiment highlights **the need of a controlled release of fluoride** in order to ensure high regioselectivities in the reaction.

### G.6. Control experiments – Utilization of Li-salts as competitive fluorophilic traps

Allyl fluoride **2b** (1 equiv., 0.2 mmol) was weighted into a 5 mL vial equipped with a magnetic stirring bar and dissolved with 1 mL of the corresponding solvent (0.2 M). Subsequently, the corresponding silyl enol ether **1b** (3 equiv., 0.6 mmol), LiClO<sub>4</sub> (1 equiv., 0.2 mmol) and a 10/20 mol% of catalyst were added. The reaction mixture was stirred at room temperature and a 50  $\mu$ L aliquot was taken at the given time. This aliquot was dried under reduced pressure and the internal standard (1,3,5-trimethoxybenzene) was added and dissolved in CDCl<sub>3</sub>.

#### Allyl fluoride in the presence of a cyclic silyl enol ether and LiClO<sub>4</sub> (with catalytic DABCO)

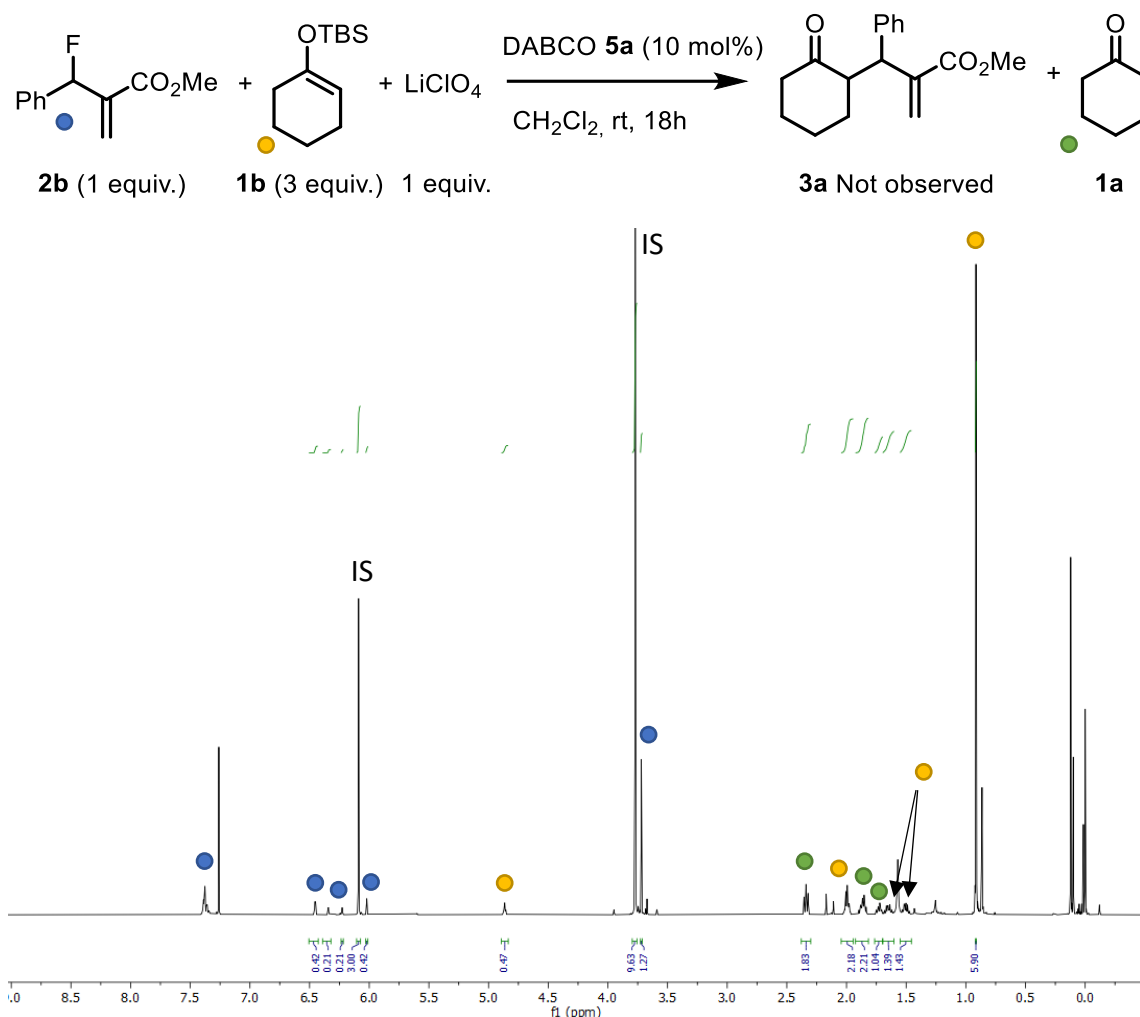

**Figure S36.** <sup>1</sup>H NMR spectrum at 500 MHz NMR field in CDCl<sub>3</sub> of the reaction crude.

[In this experiment, **the presence of a Lewis base** such as DABCO **5a** (20 mol%) in combination with LiClO<sub>4</sub> (1 equiv.) as fluorophilic trap prevents de formation of product **3a**. Additionally, 60% conversion of the starting material **2b** is observed (blue bubbles) **not yielding the desired product.**]

This experiment highlights **the need of Si-F interaction** for the reaction to proceed.

**2b** (1 equiv.) + **1b** (3 equiv.) + 1 equiv.  $\text{LiClO}_4$   $\xrightarrow[\text{THF 9:1 CH}_2\text{Cl}_2, \text{rt, 72h}]{(\text{DHQD})_2\text{PHAL } \mathbf{5b} \text{ (20 mol\%)}}$  **3a** Not observed

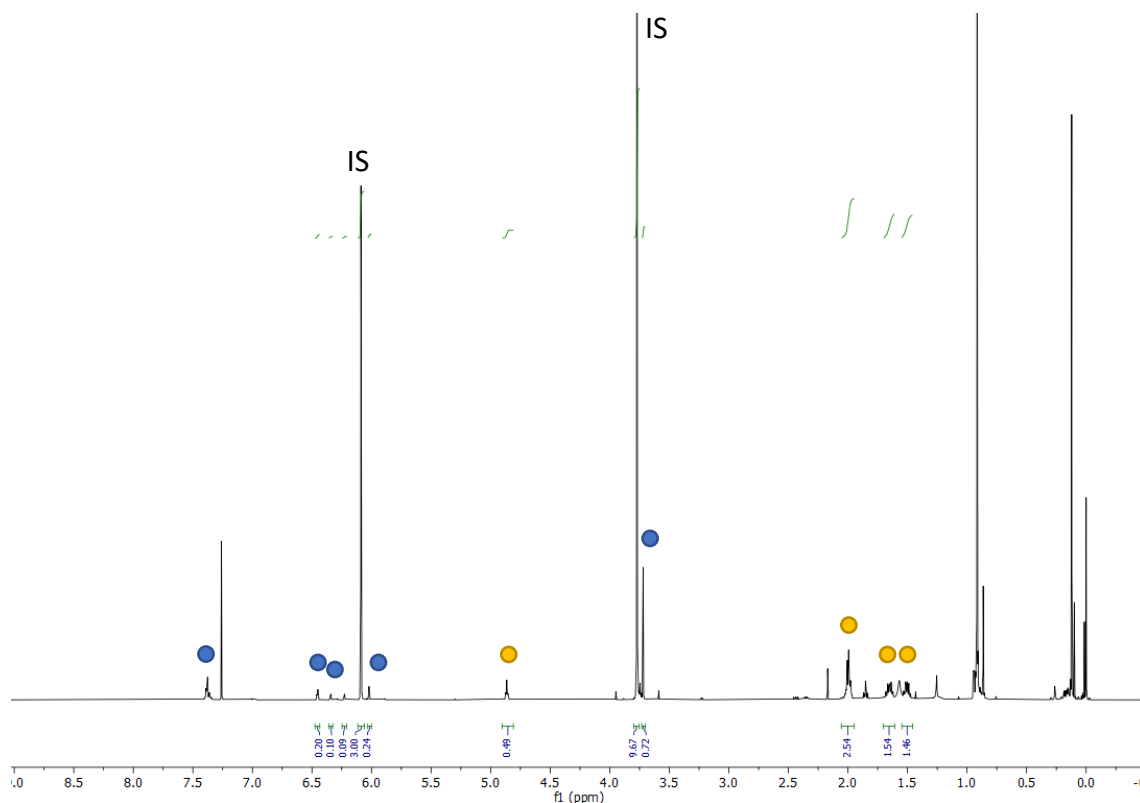

[In this experiment, **the presence of a chiral Lewis base** such as (DHQD)<sub>2</sub>PHAL **5b** (20 mol%) in combination with LiClO<sub>4</sub> (1 equiv.) as fluorophilic trap prevents de formation of product **3a**. Additionally, 80% conversion of the starting material **2b** is observed (blue bubbles) **not yielding the desired product.**]

***This experiment highlights the need of Si-F interaction for the reaction to proceed.***

**G.7. Control experiments – Reactivity of (DHQD)<sub>2</sub>PHAL with cyclic silyl enol ethers**

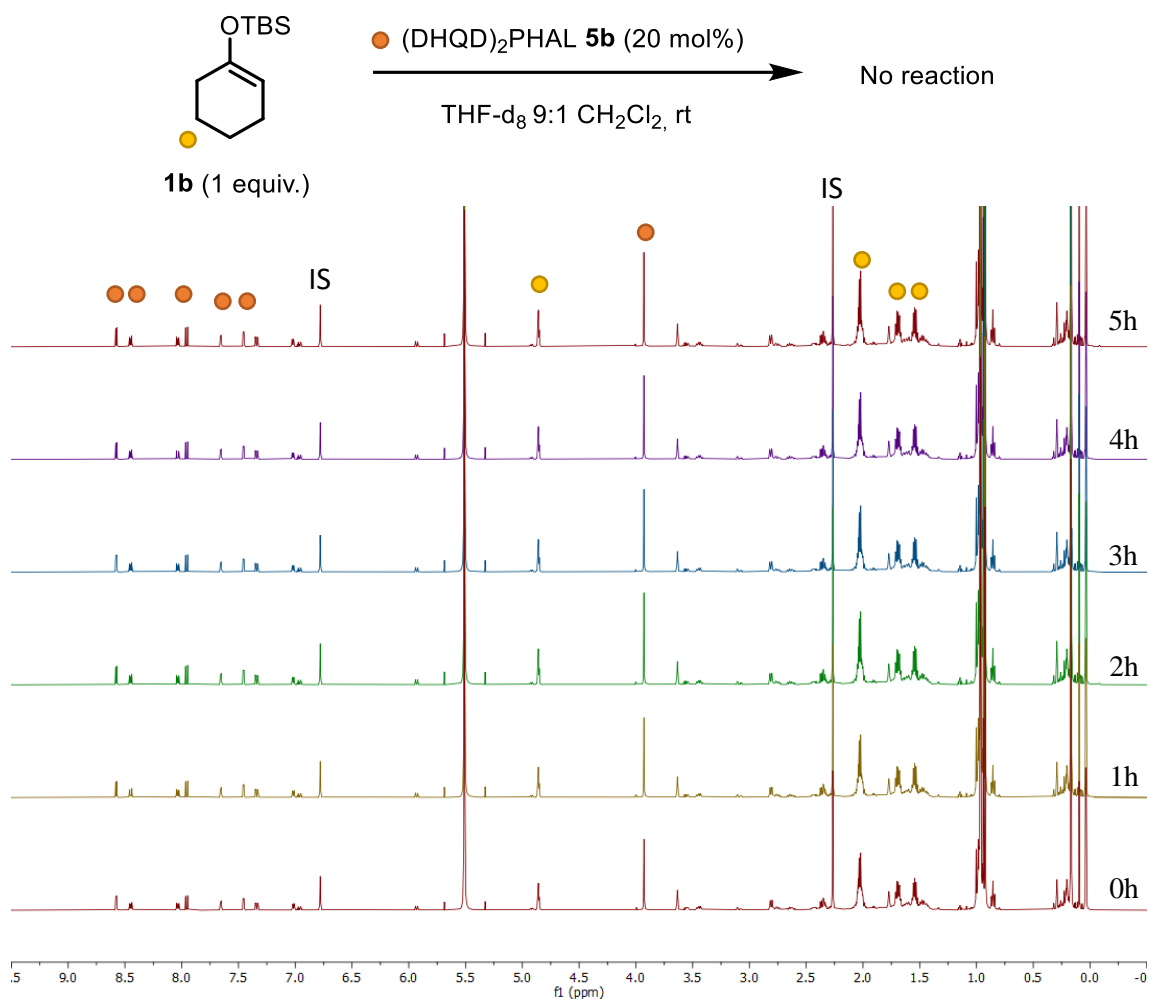

**Figure S38.** <sup>1</sup>H NMR spectra overtime at 500 MHz in THF-d<sub>8</sub>:CH<sub>2</sub>Cl<sub>2</sub> (9:1).

*This experiment highlights that silyl enol ether does not react with the chiral Lewis base catalyst (DHQD)<sub>2</sub>PHAL **5b**.*

## H. Determination of the Si-F interaction

### H.1. Determination of Si-F interaction – Electrochemical studies

We used electroanalytical tools to evidence the interaction between the allyl fluoride **2b** and the silyl enol ether **1b**.<sup>14</sup> The cyclic voltammetry experiments were carried out using a 5 mM solution of **1b** in MeCN and 0.1M of supporting electrolyte.

Firstly, we used THF as solvent to reproduce the reaction conditions, but the oxidation potential of **1b** lays outside the redox window of the solvent. In CH<sub>2</sub>Cl<sub>2</sub>, LiClO<sub>4</sub> is not soluble. Therefore, we used MeCN as solvent because both TBAClO<sub>4</sub> and LiClO<sub>4</sub> are completely soluble and the oxidation of **1b** falls within its redox window. Other electrolytes with BF<sub>4</sub><sup>-</sup> and PF<sub>6</sub><sup>-</sup> as counterions were ruled out to prevent the presence of fluorine in the solution.

#### Titration using TBAClO<sub>4</sub> as supporting electrolyte

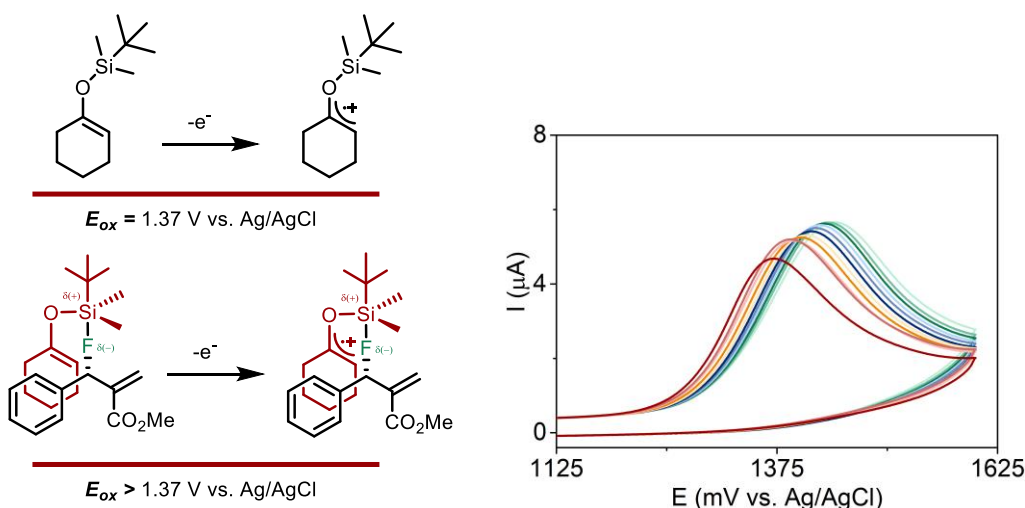

**Figure S39.** Anodic CV of silyl enol ether **1b** (5mM) in 0.1M TBAClO<sub>4</sub> MeCN solution with increasing equivalents of **2b**. (red line – 0 equiv.; pale green line – 5.0 equiv.) GC electrode. Scan rate 100 mV/s, potential refers to Ag/AgCl at room temperature using a platinum wire as a counter electrode.

[In this experiment, **the cathodic shift** of the oxidation potential of **1b** in the presence of aliquots of **2b** **highlights the presence of an interaction** between allyl fluorides and fluorophilic species. This observation is consistent with the formation of the pentacoordinated complex whose central silicon atom becomes inherently electron-deficient due to hypervalent bonding. Therefore, the electron-deficient silicon atom reduces the electron density on the enol ether moiety making it more difficult to oxidize.]

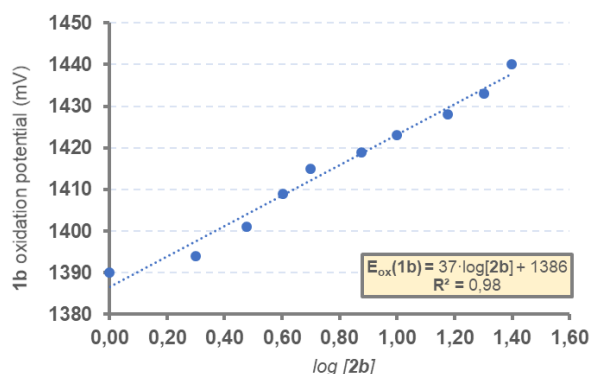

**Figure S40.** Plot of the shift in the potential of **1b** measured by CV against log of the concentration of **2b**.

We tried to deduce the stoichiometry of the complex by using the Nernst binding stoichiometry of the CV reported in Figure S39. As observable in Figure S40, the slope is 37 mV/dec, far from the ideal 59 mV/dec at 298K observed for a 1 to 1 complex stoichiometry.

**Titration using  $\text{LiClO}_4$  as supporting electrolyte**

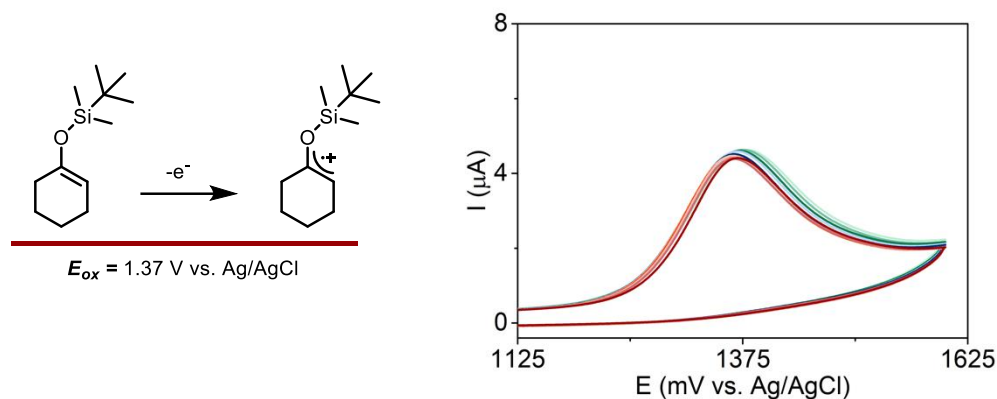

**Figure S41.** Anodic CV of silyl enol ether **1b** (5mM) in 0.1M  $\text{LiClO}_4$  MeCN solution with increasing equivalents of **2b**. (red line – 0 equiv.; pale green line – 5.0 equiv.) GC electrode. Scan rate 100 mV/s, potential refers to Ag/AgCl at room temperature using a platinum wire as a counter electrode.

*[In this experiment, **the absence of cathodic shift** of the oxidation potential of **1b** in the presence of aliquots of **2b** highlights the absence of an interaction between allyl fluorides and fluorophilic species due to **the presence of  $\text{LiClO}_4$  as fluorophilic trap.**]*

## H.2. Determination of Si-F interaction – $^{19}\text{F}$ NMR Titration

Another method to evidence the interaction between the allyl fluoride **2b** and the silyl enol ether **1b** is the utilization of  $^{19}\text{F}$  NMR due to the high sensitivity of this nucleus.<sup>15</sup>

### General Procedure for the $^{19}\text{F}$ NMR titration

In an NMR tube, 0.1 mmol of **2b** were dissolved in 0.5mL of deuterated solvent. Then, the  $^{19}\text{F}\{^1\text{H}\}$  NMR spectrum of the previously mentioned solution was measured. Increasing equivalents of **1b** were added to the NMR tube.

The spectra were referenced through an external shift referencing the residual peak of the corresponding deuterated solvent in the  $^1\text{H}$  NMR spectra by using the xiref command.

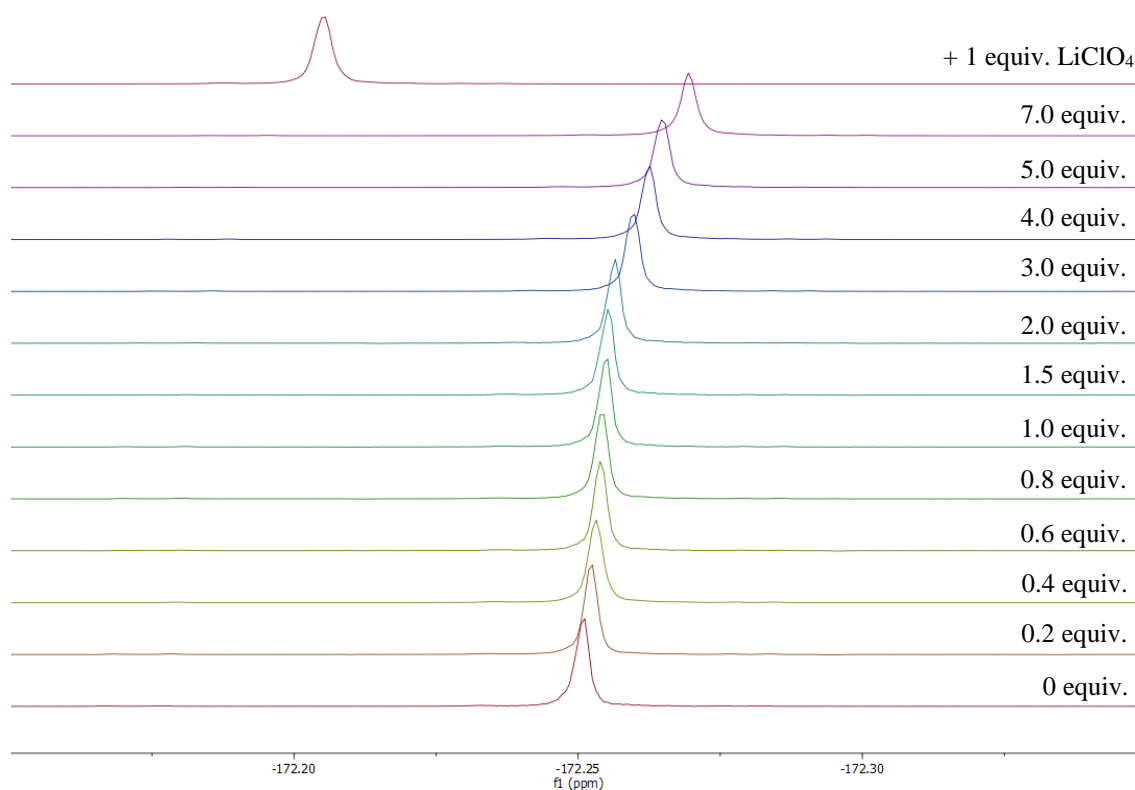

**Figure S42.**  $^{19}\text{F}\{^1\text{H}\}$  NMR spectra at 470 MHz NMR field in  $\text{THF-d}_8$  of **2b** (bottom) with increasing equivalents of **1b** (from 0.2 to 7 equiv.)

[In this experiment, the shift of the  $^{19}\text{F}\{^1\text{H}\}$  signal of **2b** in the presence of increasing amounts of **1b** highlights the presence of an interaction between an allyl fluoride and fluorophilic species. When the solution is quenched with  $\text{LiClO}_4$ , the peak shifts towards higher chemical shifts.]

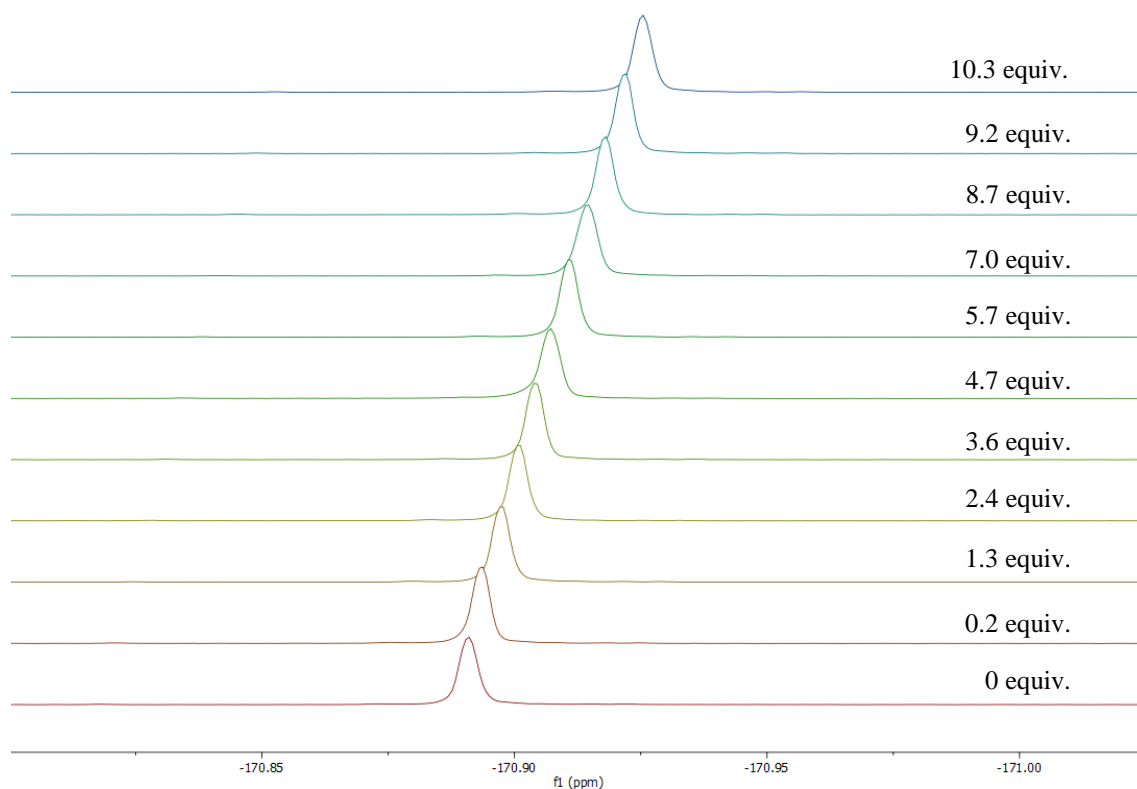

**Figure S43.**  $^{19}\text{F}\{^1\text{H}\}$  NMR spectra at 470 MHz NMR field in  $\text{CD}_2\text{Cl}_2$  of **2b** (bottom) with increasing equivalents of **1b** (from 0.2 to 10.3 equiv.)

*[In this experiment, the shift of the  $^{19}\text{F}\{^1\text{H}\}$  signal of **2b** in the presence of increasing amounts of **1b** highlights the presence of an interaction between allyl fluorides and fluorophilic species. The experiment in the presence of  $\text{Li}^+$  salts could not be performed due to its insolubility in  $\text{CD}_2\text{Cl}_2$ .]*

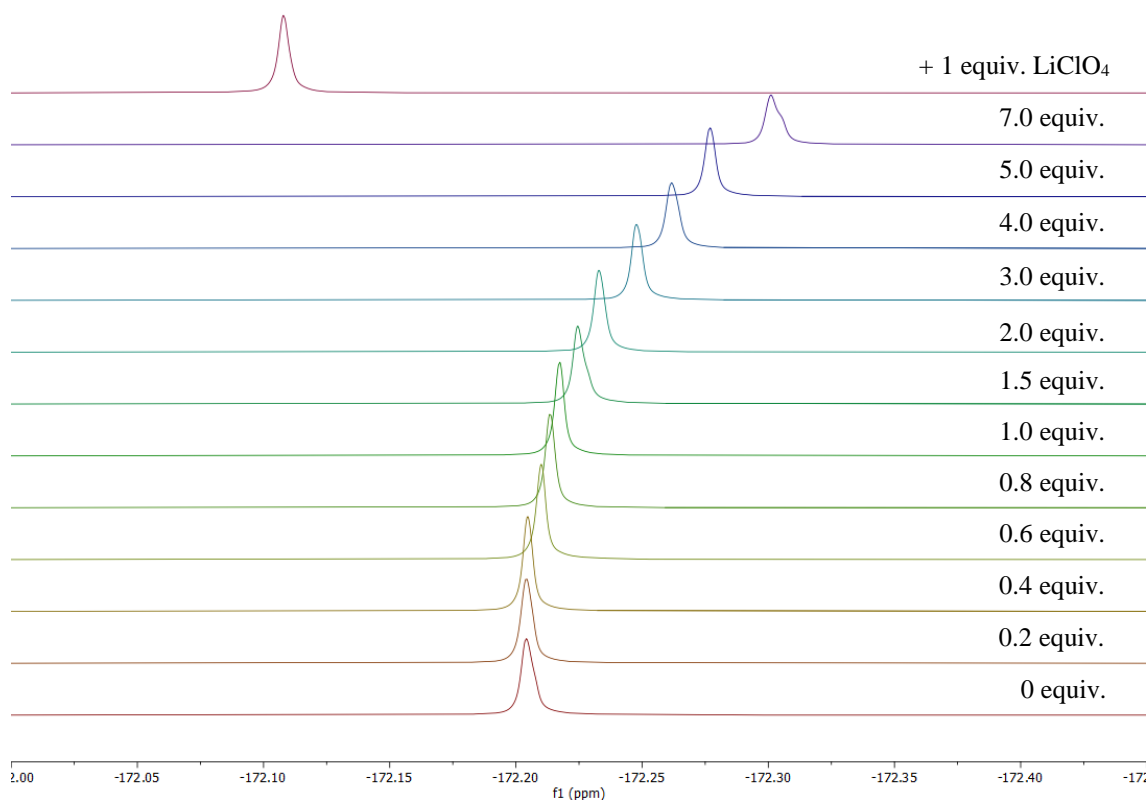

**Figure S44.**  $^{19}\text{F}\{^1\text{H}\}$  NMR spectra at 470 MHz NMR field in  $\text{THF}_d_8/\text{CD}_2\text{Cl}_2$  (9:1) of **2b** (bottom) with increasing equivalents of **1b** (from 0.2 to 7 equiv.).

*[In this experiment, the shift of the  $^{19}\text{F}\{^1\text{H}\}$  signal of **2b** in the presence of increasing amounts of **1b** highlights the presence of an interaction between an allyl fluoride and fluorophilic species under reaction conditions ( $\text{THF}_d_8/\text{CD}_2\text{Cl}_2 = 9:1$ ). When the solution is quenched with  $\text{LiClO}_4$ , the peak shifts towards higher chemical shifts.]*

Although both  $\text{Li}^+$  and the Si atom in SEE **1b** are both acting as Lewis acids in their interaction with the fluorine atom of **2b**, they are very different in nature and affect the  $^{19}\text{F}$  resonance in different ways:

- In the case of the Li cation, there is a net charge transfer from F to Li, that explains the downfield shift (from -172.21 ppm to -172.11 ppm) upon addition of  $\text{LiClO}_4$  (Figure S44) to a  $\text{THF}_d_8/\text{CD}_2\text{Cl}_2=9:1$  solution of **2b**.
- On the other hand, the interaction with **1b** leads to the formation of a pentacoordinated TBP intermediate **B**. The upfield shift experienced by the  $^{19}\text{F}$  nucleus upon addition of increasing amounts of **1b** is what should be expected from its apical position: in hypervalent TBP complexes, the two apical ligands give rise to hypervalent three-center four-electron bonds that increases the positive charge on the silicon and the negative charge in the apical ligands with respect to the separated fragments.

### Attempt to determine $K_a$

We tried to deduce the stoichiometry of the complex using the  $^{19}\text{F}$  NMR titrations. All the attempts to find the  $K_a$  of such complex failed.  $^{19}\text{F}$  NMR titrations at low concentrations of **2b** ( $[i] = 0.01\text{ M}$ ) showed a linear shift even after the addition of 300 equivalents of **1b** (from 0.01 M to 3 M). Thus, we conclude that the association constant is  $\ll 1$  and complex saturation was never reached.

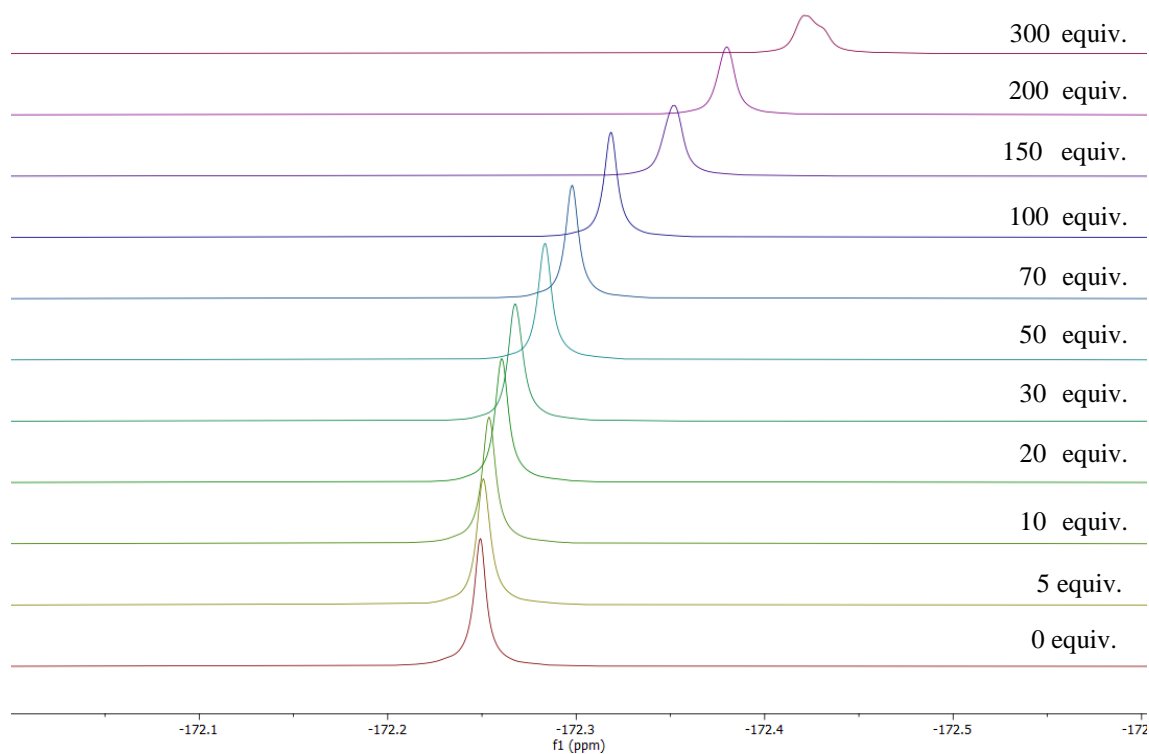

**Figure S45.**  $^{19}\text{F}\{^1\text{H}\}$  NMR spectra at 470 MHz NMR field in THF- $d_8$ /CD $_2$ Cl $_2$  (9:1) of **2b** (bottom) with increasing equivalents of **1b** (from 0.2 to 7 equiv.).

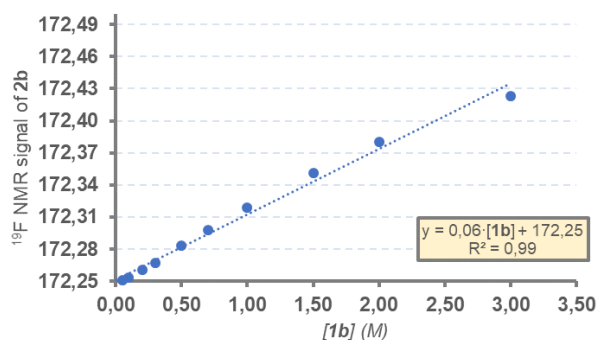

**Figure S46.** Plot of the shift of the  $^{19}\text{F}$  resonance of **2b** against the concentration of **1b**.

*<sup>19</sup>F NMR of an alternative allyl fluoride*

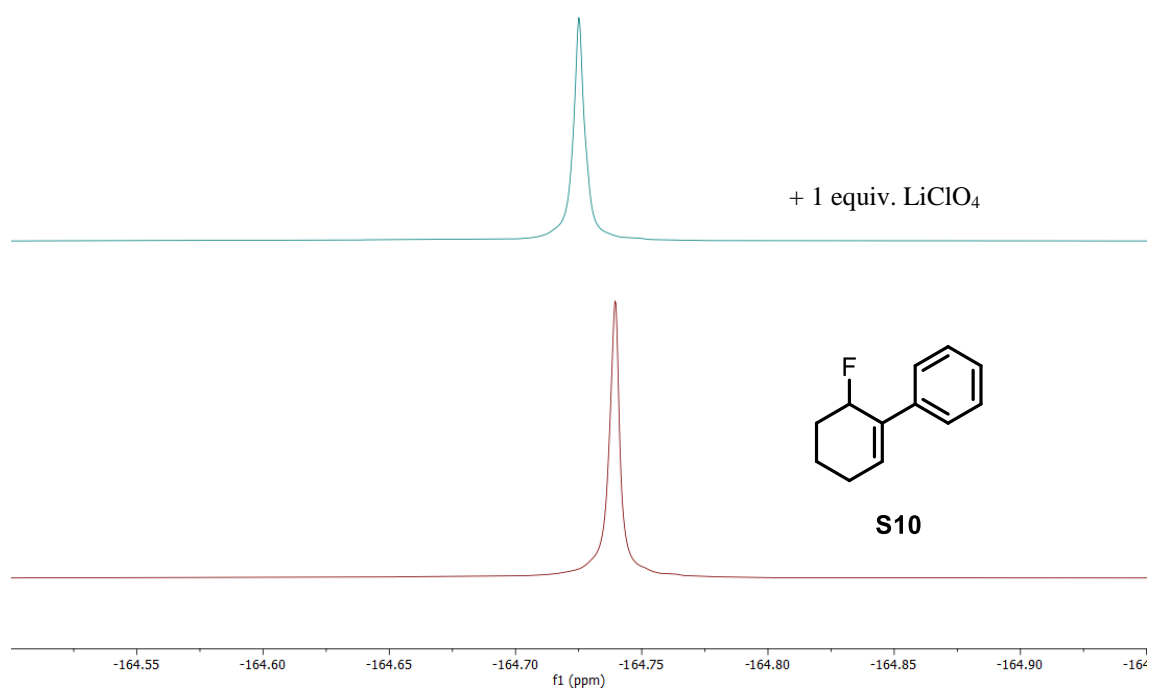

**Figure S47.** <sup>19</sup>F{<sup>1</sup>H} NMR spectra at 470 MHz NMR field in THF-*d*<sub>8</sub>/CD<sub>2</sub>Cl<sub>2</sub> (9:1) of **S10** (bottom) with 1 equivalent of LiClO<sub>4</sub>.

*[We have treated a solution of 2-phenyl-3-fluorocyclohexene **S10**, an allyl fluoride without ester groups, in THF-*d*<sub>8</sub>/CD<sub>2</sub>Cl<sub>2</sub> = 9:1 with LiClO<sub>4</sub> and we have also observed a downfield shift of the <sup>19</sup>F resonance. The magnitude of the shift is however smaller (from -164.74 ppm to -164.72 ppm) than that observed for **2b** (from -172.21 ppm to -172.11 ppm), a fact that can be attributed to the stabilization of the corresponding Lewis acid/base complex between **2b** and Li<sup>+</sup> by a chelate effect with the ester moiety of **2b**.]*

### H3. Detailed discussion of the proposed structure for hypervalent intermediate **B**

Our experimental observations of an anodic shift in the oxidation potential of SEE **1b** upon sequential addition of allylic fluoride **2b** (Figure S39), together with a shift in the fluorine resonance in **2b** towards higher fields with increasing amounts of **1b**, can be accommodated within a trigonal bipyramid (TBP) geometry for **B**. In such spatial configuration, the weak sigma-donor fluorine atom (the most electronegative atom of the substituents) occupies an apical position by hypervalent bonding. The oxygen atom of the SEE moiety occupies an equatorial position that facilitates back  $\pi$ -bonding between the enol ether moiety and the electron-depleted silicon atom.<sup>16</sup>

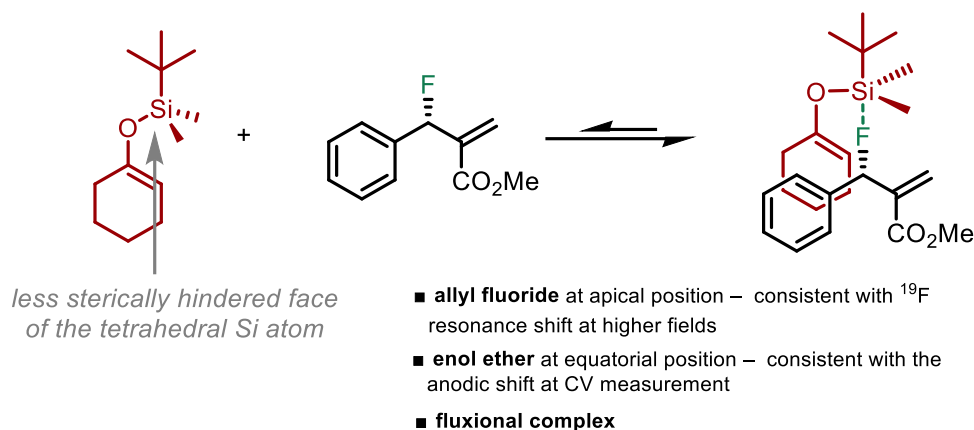

Such configuration can be rationalized considering the role of the substituents attached to the Si atom. While for steric reasons in a TBP complex the bulky *tert*-butyl group would prefer an equatorial position and the methyl group would preferentially occupy an apical one, most probably the approach of the allyl fluoride to the tetrahedral Si atom in **1b** takes place through the less hindered face of the tetrahedron (*i.e.* the one that is opposite to the *tert*-butyl group). In this scenario, the *tert*-butyl group and **2b** would initially occupy the apical positions and the enol ether moiety an equatorial position in a TBP geometry. In any case, complex **B** is certainly fluxional and in fast interchange between equatorial and apical positions. This structural flexibility will take easily place either through Berry pseudorotation or turnstile mechanisms.<sup>16a</sup> While it is true that with this geometry the SEE moiety becomes less nucleophilic, this does not preclude the activation of the  $\text{S}_{\text{N}}\text{I}$  pathway by the nucleophilic catalyst. A complex in which both O and F atoms occupy apical positions would not be productive since the reactive centers would not be in enough proximity to favor reactivity.

## I. Kinetic profiles

### 1.1. Kinetic profiles – Synthesis of the enantiopure (*R*)-2b

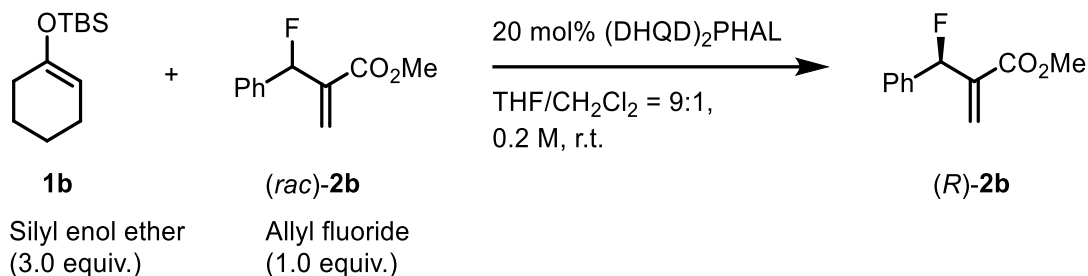

Allyl fluoride **2b** (1 equiv., 0.2 mmol) was weighted into a 5 mL vial equipped with a magnetic stirring bar and dissolved with 1 mL of a 9:1 = THF/CH<sub>2</sub>Cl<sub>2</sub> mixture (0.2 M). Subsequently, the silyl enol ether **1b** (3 equiv., 0.6 mmol) and a 20 mol% of (DHQD)<sub>2</sub>PHAL were added. The reaction mixture was stirred at room temperature until the 50% conversion of the allyl fluoride. The reaction crude was directly purified by flash column chromatography using hexane and ethyl acetate mixtures. The e.r. (98:2) was determined by chiral GC and the absolute (*R*)-configuration was determined by chemical correlation [ $\alpha$ ]<sub>D</sub><sup>25</sup> = -52.3 (*c* = 1.32, CHCl<sub>3</sub>).<sup>4</sup>

### GC Chromatogram of (*R*)-2a

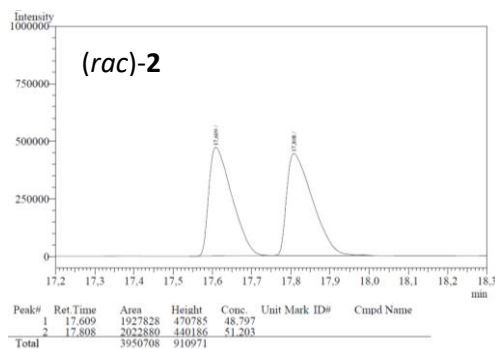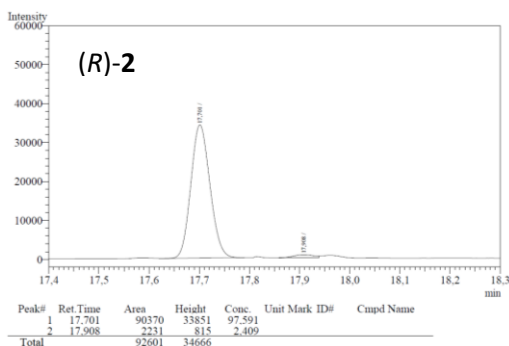

## 1.2. Kinetic profiles – Synthesis of the enantiopure (S)-2b

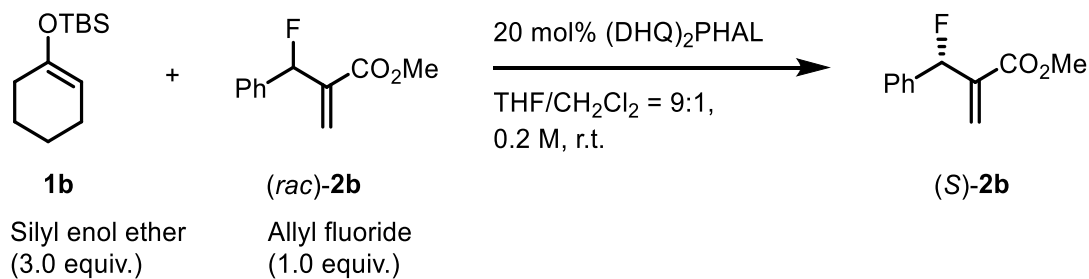

Allyl fluoride **2b** (1 equiv., 0.2 mmol) was weighted into a 5 mL vial equipped with a magnetic stirring bar and dissolved with 1 mL of a 9:1 = THF/CH<sub>2</sub>Cl<sub>2</sub> mixture (0.2 M). Subsequently, the silyl enol ether **1b** (3 equiv., 0.6 mmol) and a 20 mol% of (DHQ)<sub>2</sub>PHAL were added. The reaction mixture was stirred at room temperature until the 50% conversion of the allyl fluoride. The reaction crude was directly purified by flash column chromatography using hexane and ethyl acetate mixtures. The e.r. (88:12) was determined by chiral GC.

### GC Chromatogram of (S)-2a

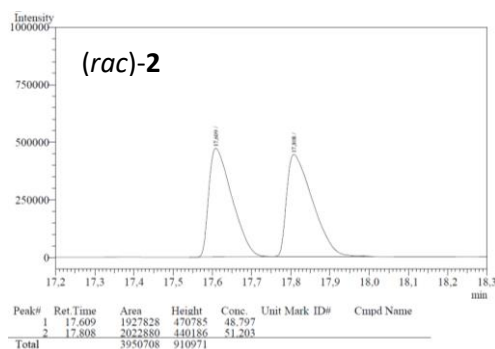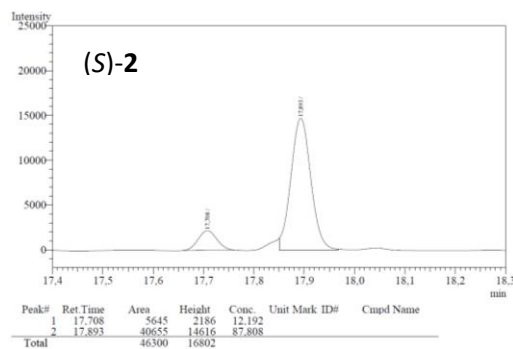

### 1.3. Kinetic profiles

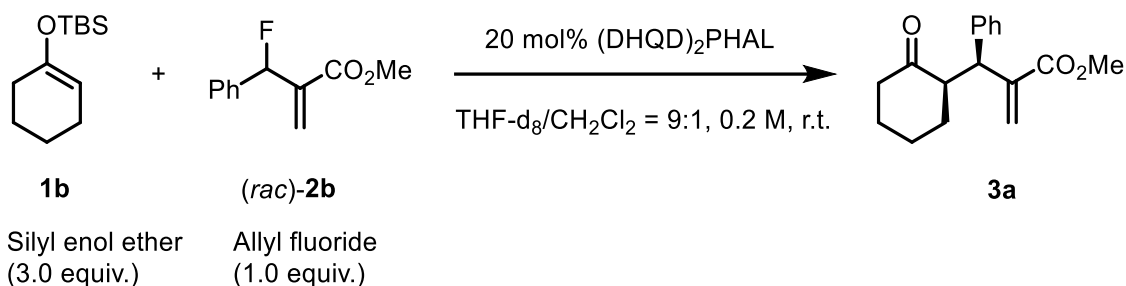

Allyl fluoride **2b** (1 equiv., 0.4 mmol) was weighted into a 5 mL vial equipped with a magnetic stirring bar and dissolved with 2 mL of a 9:1 = THF- $d_8$ /CH $_2$ Cl $_2$  mixture (0.2 M). Subsequently, silyl enol ether **1b** (3 equiv., 1.2 mmol) and a 20 mol% of (DHQD) $_2$ PHAL were added. Immediately, 0.5 mL of the reaction mixture was transferred to an NMR tube and the other 1.5 mL of solution were stirred in the same vial at room temperature. Conversion of **2b** was analyzed by *in situ*  $^1\text{H}$  and  $^{19}\text{F}$  NMR, and the enantiomeric excess of **2b** and **3a** were analyzed by chiral GC and HPLC, respectively.

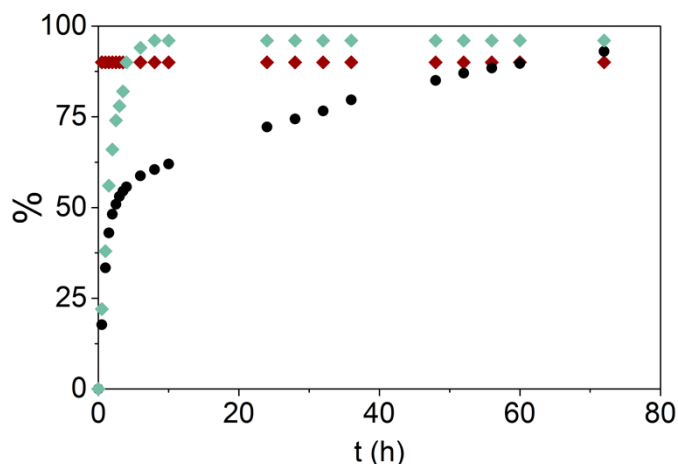

**Figure S48.** Reaction conversion (black dots) and enantiomeric excess of **2b** (green diamonds) and **3a** (red diamonds).

*[This experiment demonstrates that the reaction proceeds through a dynamic kinetic resolution of the racemic allyl fluoride **2b**. The reaction exhibits an initial fast regime where only the (S)-**2b** is consumed. Around 50% of conversion, the remaining allyl fluoride **2b** is essentially in its (R) form and the reaction kinetics shifts to a second, slower regime controlled by the racemization of the remaining (R)-**2b**. The enantiomeric excess of the product does not change during the reaction.]*

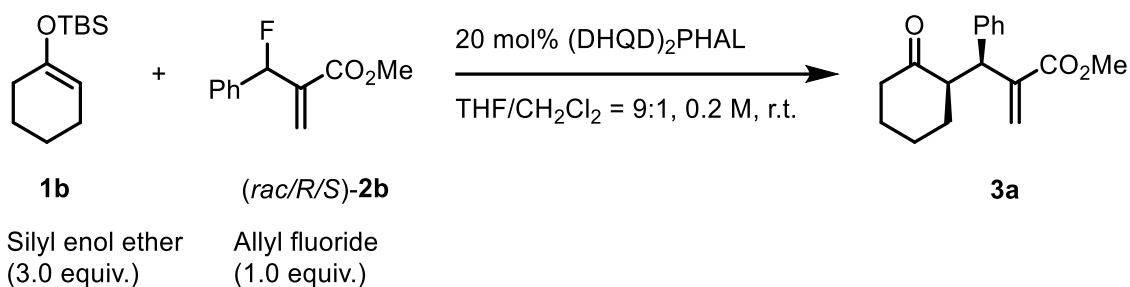

The corresponding allyl fluoride **2b** (1 equiv., 0.05 mmol) was weighted into a 5 mL vial equipped with a magnetic stirring bar and dissolved with 0.25 mL of a 9:1 = THF/CH<sub>2</sub>Cl<sub>2</sub> mixture (0.2 M). Subsequently, the corresponding silyl enol ether **1b** (3 equiv., 0.15 mmol) and a 20 mol% of (DHQD)<sub>2</sub>PHAL were added. The reaction mixture was stirred at room temperature. Conversion and ee of the 3 reactions were analyzed by conventional and chiral GC chromatography respectively.

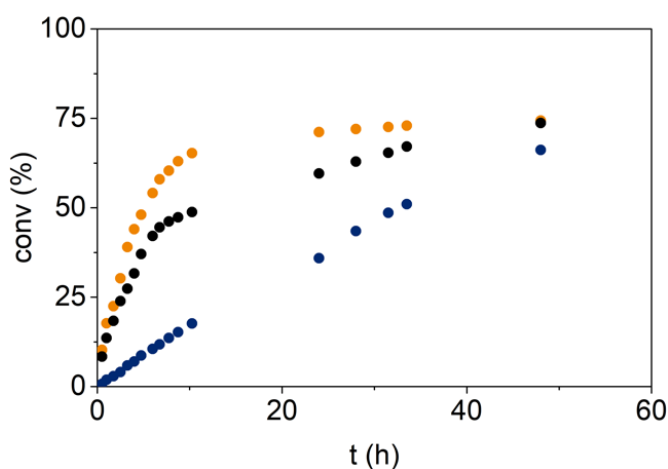

**Figure S49.** Kinetic profiles (conv. vs time) analyzed by GC of three different reactions using *(rac)*-**2b** (black dots), *(R)*-**2b** (blue dots) and *(S)*-**2b** (yellow dots) as starting allyl fluoride.

*[This experiment shows the different reaction regimes using an allyl fluoride with different enantiomeric compositions. The reaction conversion starting from highly-enantioenriched *(R)*-2b (*R/S*=98:2) proceeds through a single, slow regime controlled by substrate racemization (blue). The kinetic profile employing a scalemic mixture of the *(S)*-2b (*R/S*=12:88) features a faster initial regime up to 70% conversion (yellow). The reaction conversion starting from *(rac)*-2b starts with an initial fast regime changing at 50% conversion to a slow regime controlled by substrate racemization (black).]*

#### 1.4. Racemization of the allyl fluoride

The two experiments shown below were performed to study the racemization of the allyl fluoride.

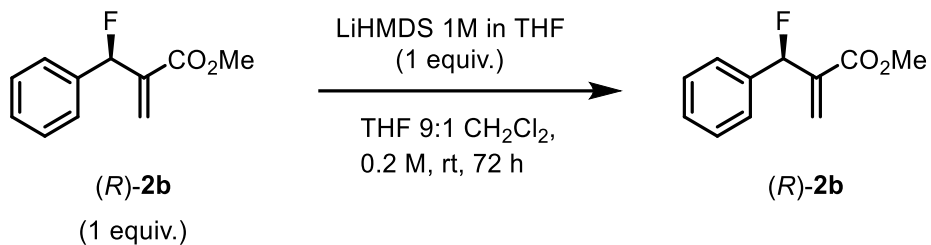

[Using a strong non-nucleophilic base, such as LiHMDS, no racemization of the allyl fluoride was observed by chiral GC.]

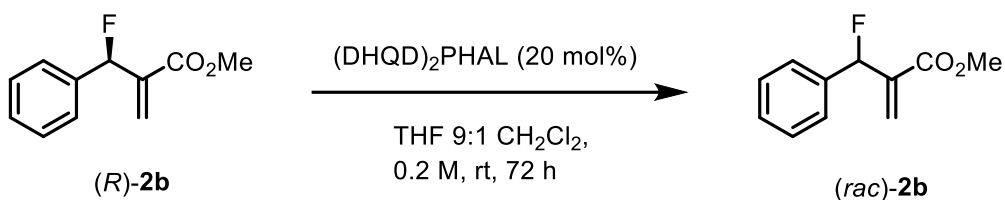

[A highly-enantioenriched sample of the allyl fluoride (R)-2b (R/S)=98:2 was racemized in 72 h under the effect of catalytic amounts (20 mol%) of (DHQD)<sub>2</sub>PHAL (5b), as determined by chiral GC.<sup>17</sup>]

### 1.5. Identification of the catalyst resting state

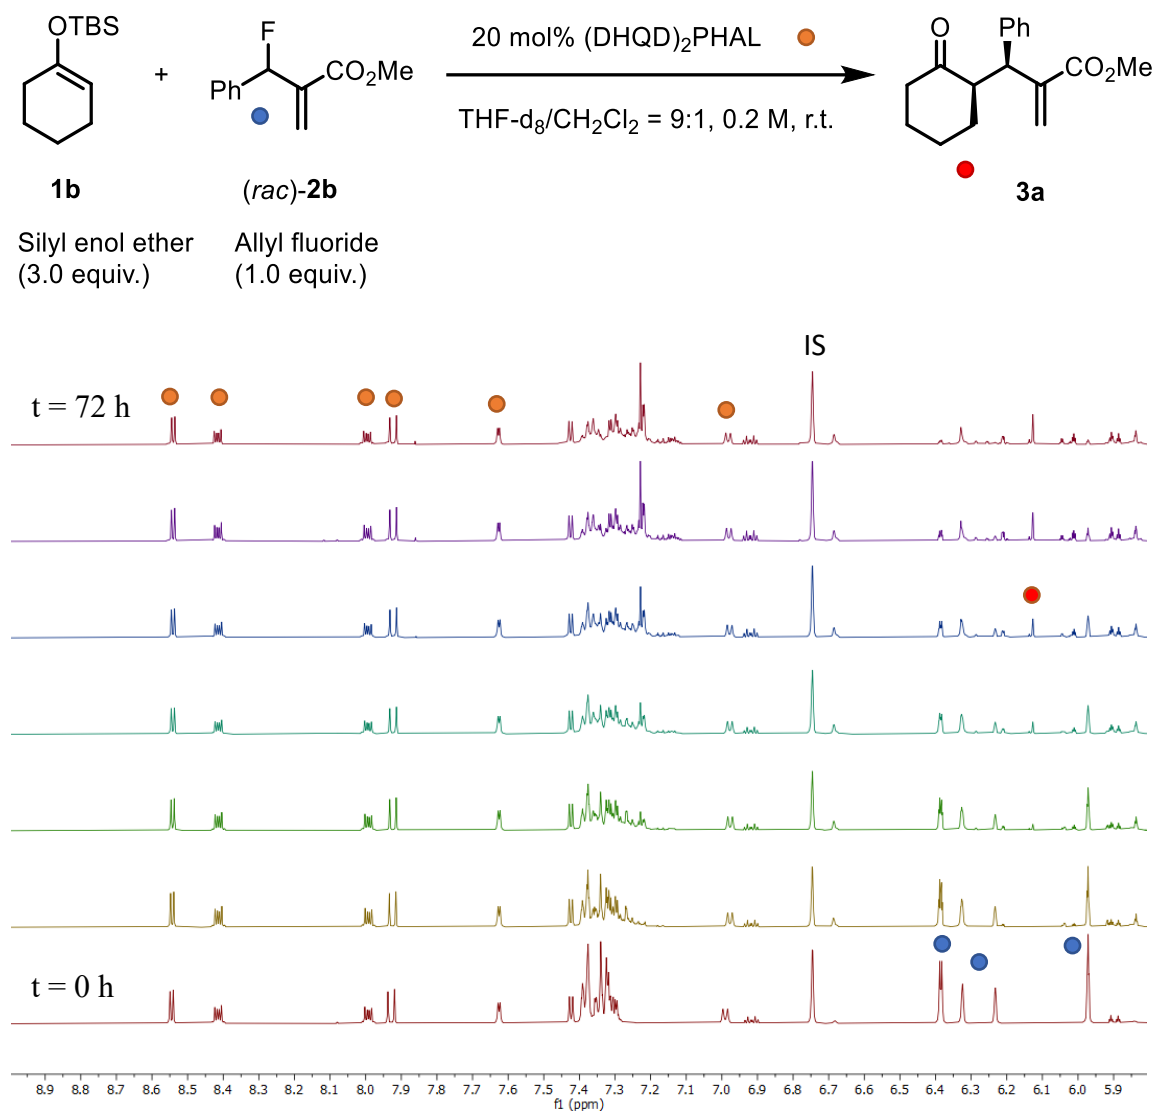

**Figure S50.** Stacked  $^1\text{H}$  NMR spectra at 500 MHz NMR field, acquired at regular intervals of time, of the catalytic reaction *in situ* monitored into the NMR tube over 72h.

[The sole detectable catalytic species during the whole reaction course is the free catalyst (DHQD) $_2$ PHAL (**5b**)]

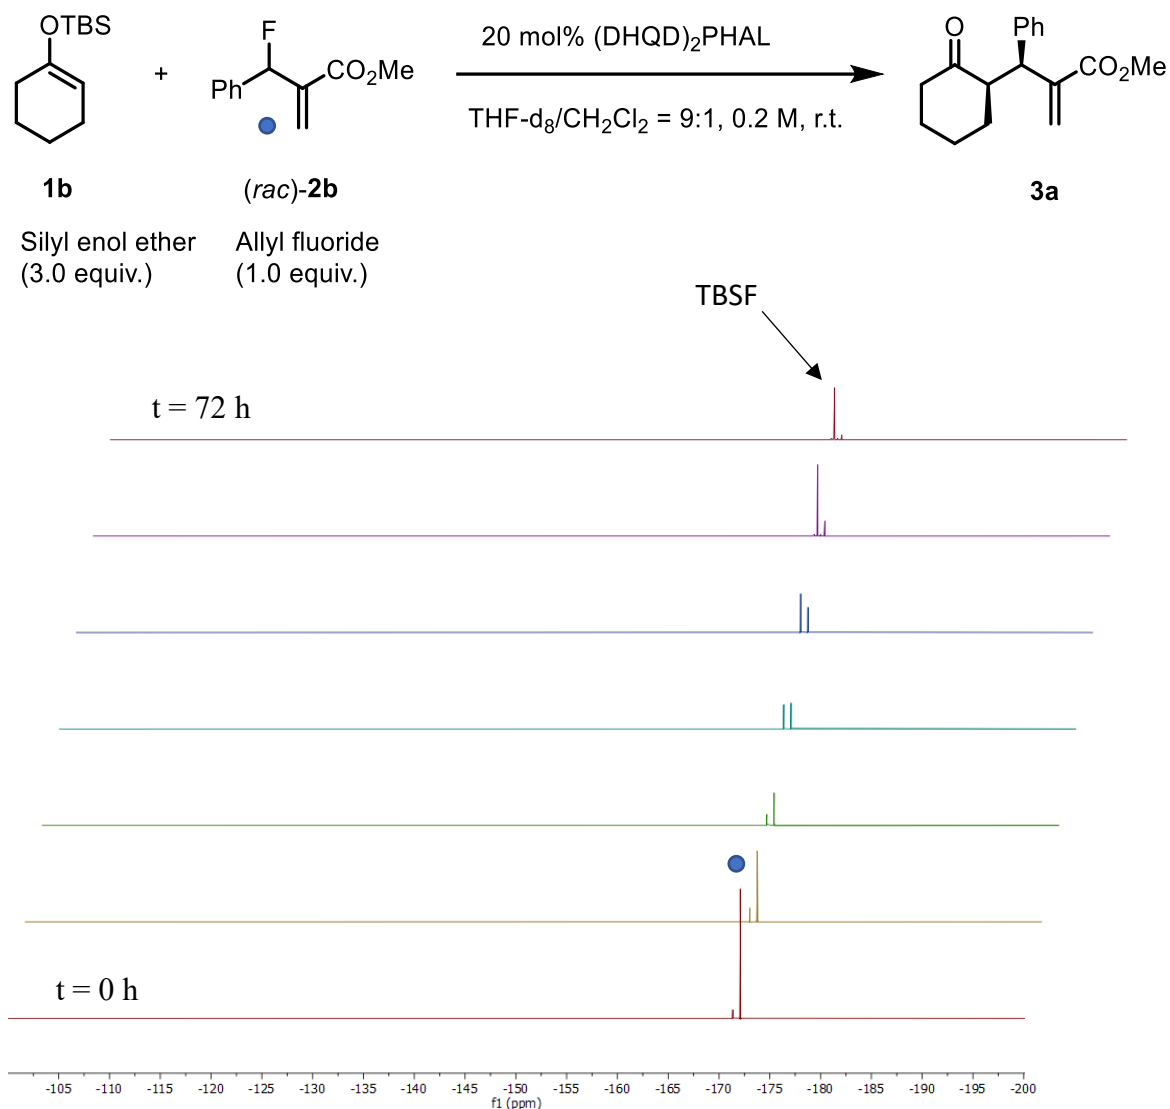

**Figure S51.** Stacked  $^{19}\text{F}\{^1\text{H}\}$  NMR spectra at 470 MHz NMR field, acquired at regular intervals of time, of the catalytic reaction *in situ* monitored into the NMR tube over 72h.

*[During the reaction course, fluoride anion is not detected]*

## J. Mechanistic consideration

The kinetic data acquired during the development of this project (Figure 4A of the manuscript and section I of the SI) could in principle fit with two different mechanistic scenarios shown in the figure below (S52).

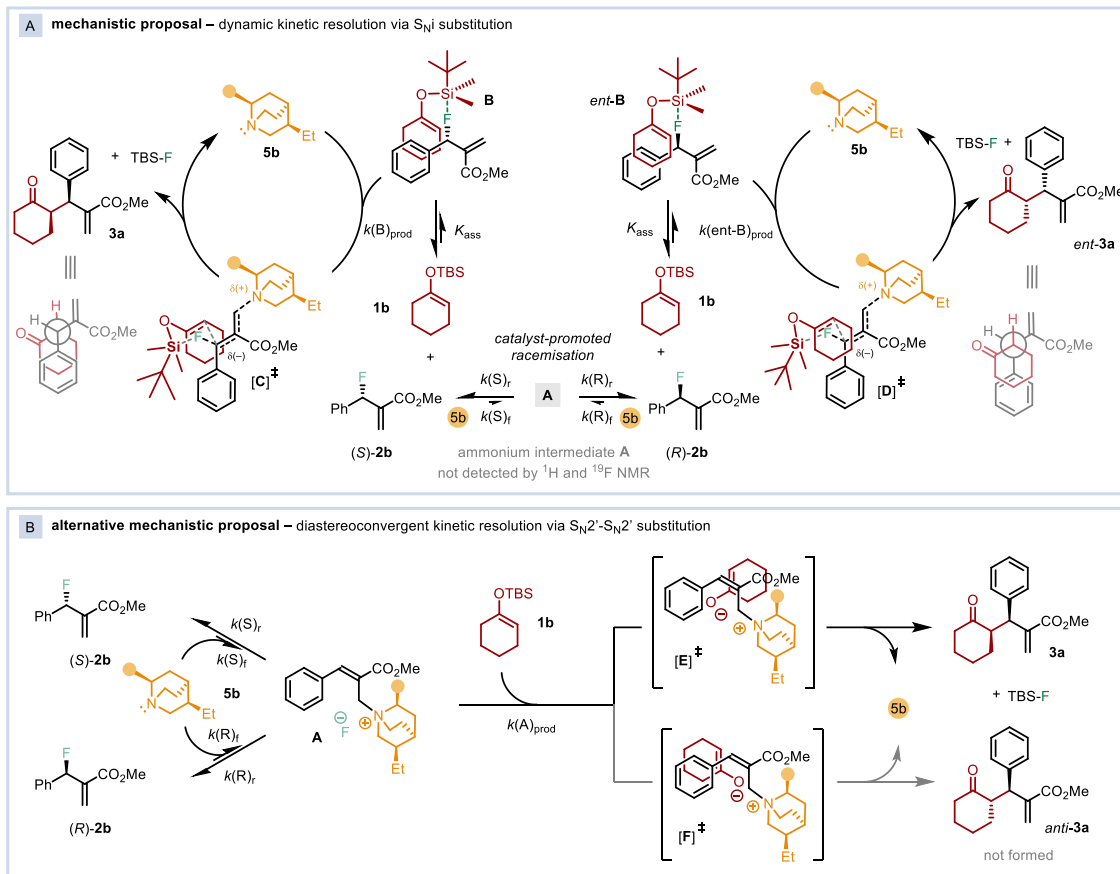

**Figure S52.** Schemes of the two plausible mechanistic scenarios.

On the one hand, the proposed dynamic kinetic resolution via  $S_Ni$  substitution (figure S52, A), and on the other hand a diastereoconvergent kinetic resolution via two consecutive  $S_N2'-S_N2'$  substitutions (figure S52, B). Both mechanisms involve the reversible, endoergic formation of the chiral quaternary ammonium intermediate **A**. In the first one, **A** is involved in the catalyst-promoted racemization of **2b**; in the second one **A** is the immediate precursor of the allylation product **3a**.

**Scenario A** – according to the Si–F interaction between substrates **1b** and **2b**, the reaction should proceed via intermediate **B** where  $k(B)_{\text{prod}}$  would determine the first reaction regime while  $k(R)_f$  would control the second, slower reaction regime. This is  $k(B)_{\text{prod}} > k(R)_f \gg k(\text{ent-B})_{\text{prod}}$ .

**Scenario B** – the fast initial regime would be governed by  $k(S)_f$  and the slower regime by  $k(R)_f$ . The fact that intermediate **A** has not been detected nor by mixing **2b** with **5b** neither upon *in-situ* monitoring the reaction by  $^1\text{H}$  and  $^{19}\text{F}$  NMR, means that in any case  $k(A)_{\text{prod}} \gg k(S)_f > k(R)_f$  with  $k(R)_r \gg k(R)_f$  and  $k(S)_r \gg k(S)_f$ .

Although we cannot rule out any of the two possible scenarios, based on a series of experimental evidence detailed below, including the reaction stereochemical outcome and diverse control experiments, along with key the literature precedents, such as the pioneering methodologies using allyl fluorides in a Lewis-base catalysed asymmetric allylic alkylation reported by Shibata,<sup>18</sup> we believe that the most likely mechanistic scenario is the one depicted in scheme S52A.

We think that the following experimental observations support our mechanistic proposal:

- *Observation* – The reaction between rac-**2b** and **1b** catalysed by **5b** is highly diastereoselective, affording exclusively the *syn*-allylated ketone **3a**.

*Hypothesis* – This fact might indicate that the reaction proceeds via a highly-ordered transition state, such as the chair-like six-membered transition state **C** proposed in scenario A. Conversely, the nucleophilic attack of the enolate upon intermediate **A** (scenario B) is more likely to proceed with poor control over the two prochiral faces of the nucleophile (e.g. transition states E and F), which would lead to the formation of products **3a** in poor diastereocontrol.

- *Observation* – The reaction between rac-**2b** and **1b** catalysed by DABCO is also highly diastereoselective, affording the racemic product **3a** as a single diastereoisomer (>20:1). By in-situ NMR, we observed that upon mixing **2b** with 20 mol% of DABCO the corresponding achiral ammonium intermediate **A** (not shown in scheme S52) is formed as a 75:25 *E/Z* mixture and the equilibria is completely shifted towards **A** in 4h (section F4 of SI).

*Hypothesis* – It is reasonable to think that intermediate **A** derived from DABCO will be less sterically hindered than the corresponding species **A** derived from **5b**. In this scenario, a highly diastereoselective attack of the nucleophilic enolate to electrophilic species **A** (which moreover is a diastereomeric mixture of *E/Z* isomers) via an open transition state is unlikely.

- *Observation* – In section F2 we demonstrate that when allyl carbonate **2a** is used instead of allyl fluoride **2b**, the formation of the corresponding ammonium species **A** with 20 mol% of DABCO is much faster (1h vs. 4h). In addition, in this case, the formation of **A** is irreversible due to decomposition of the leaving group (forming *tert*-butoxide anion and carbon dioxide). On the other hand, we performed the control experiment using allyl carbonate **2a** (1 equiv.) with SEE **1b** (3 equiv.) catalysed by 20 mol% of DABCO together with 1 equiv. of TBAF (figure S22), and no traces of product **3a** were observed after 18h.

*Conclusion* – This fact points out that the presence of intermediate **A** together with the nucleophilic SEE do not guarantee suitable reactivity, highlighting therefore that the Si–F interaction plays a pivotal role in the observed reactivity.

## K. Derivatizations

### K.1. Hydrogenation – Reduction of the terminal alkene

#### Hydrogenation on Pd/C

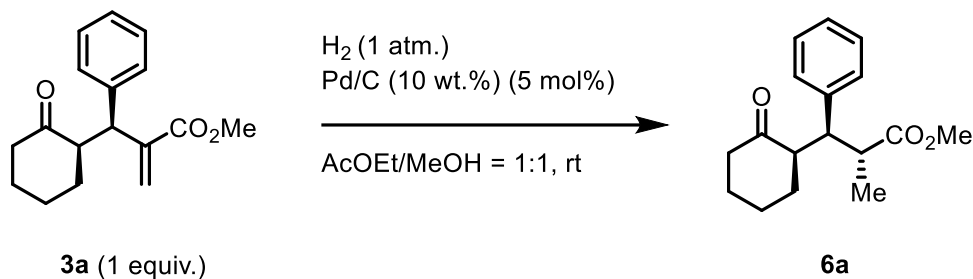

The reaction was carried out following the previously described procedure<sup>2</sup>

To a solution of compound **3a** (0.2 mmol) in 2 mL of a AcOEt/MeOH = 1:1 mixture (0.1 M) was added 10 wt.% Pd/C (0.05 equiv.). The hydrogenation was carried out under a hydrogen atmosphere at room temperature and atmospheric pressure until full conversion of the starting material was detected by TLC analysis. Then, the reaction mixture was filtered through Celite and the filtrate was concentrated under vacuum. Purification of the residue by flash column chromatography using hexane and ethyl acetate mixtures afforded the desired reduced product **6a** (>98% yield, d.r. =2:1) as a colourless oil.

#### methyl (2R,3R)-2-methyl-3-((R)-2-oxocyclohexyl)-3-phenylpropanoate (**6a**)

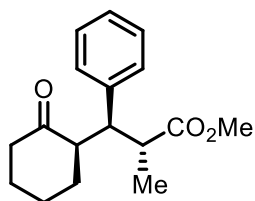

<sup>1</sup>H NMR (400 MHz, CDCl<sub>3</sub>)  $\delta$  7.19-7.16 (3H, m), 7.08-7.04 (2H, m), 3.54 (3H, s), 3.24-3.10 (3H, m), 3.51-3.38 (2H, m), 2.11-2.00 (1H, m), 1.79-1.68 (2H, m), 1.68-1.61 (1H, m), 1.60-1.51 (1H, m), 1.17-1.07 (1H, m), 1.05 (3H, d,  $J$  = 6.80 Hz); <sup>13</sup>C NMR (100 MHz, CDCl<sub>3</sub>)  $\delta$  213.7, 175.5, 139.5, 129.4, 128.2, 126.9, 52.7, 51.4, 48.6, 43.1, 41.8, 33.7, 29.2, 25.5, 15.9. HRMS (ESI) Calculated for C<sub>17</sub>H<sub>23</sub>O<sub>3</sub><sup>+</sup> ([M+H]<sup>+</sup>) 275.1642. Found 275.1642. [ $\alpha$ ]<sub>D</sub><sup>25</sup> = +42.6 (c = 0.88, CHCl<sub>3</sub>).

### Ir-mediated hydrogenation

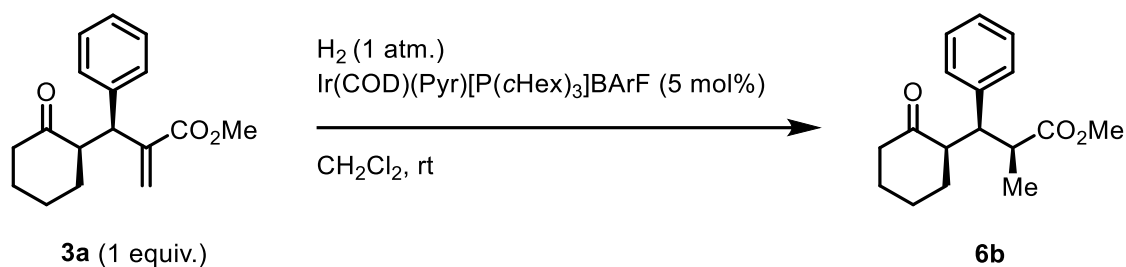

To a solution of compound **3a** (54.6 mg, 1 equiv., 0.2 mmol) in 2 mL of  $\text{CH}_2\text{Cl}_2$  (0.1 M) was added  $\text{Ir}(\text{COD})(\text{Pyr})[\text{P}(\text{cHex})_3]\text{BArF}$  (16.5 mg, 0.05 equiv., 0.01 mmol). The hydrogenation was carried out under hydrogen atmosphere at room temperature and atmospheric pressure until full conversion of the starting material was detected by TLC analysis. Then, the reaction mixture was filtered through Celite and the filtrate was concentrated under vacuum. Purification of the residue by flash column chromatography using hexane and ethyl acetate mixtures afforded the desired reduced product **6b** (92% yield, d.r. =10:1) as a yellow oil.

### methyl (2S,3R)-2-methyl-3-((R)-2-oxocyclohexyl)-3-phenylpropanoate (**6b**)

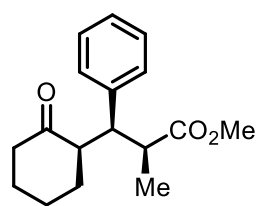

$^1\text{H NMR}$  (400 MHz,  $\text{CDCl}_3$ )  $\delta$  7.32-7.10 (5H, m), 3.62 (3H, s), 2.95-2.83 (1H, m), 2.76 (1H, td,  $J = 9.36, 4.77$  Hz), 2.52-2.43 (1H, m), 2.38-2.28 (1H, m), 1.97-1.85 (1H, m), 1.79-1.66 (3H, m), 1.58-1.46 (1H, m), 1.29-1.16 (2H, m), 0.94 (3H, d,  $J = 6.98$  Hz);  $^{13}\text{C NMR}$  (100 MHz,  $\text{CDCl}_3$ )  $\delta$  212.9, 176.1, 139.3, 129.5, 128.4, 126.9, 53.7, 51.7, 46.9, 43.1, 41.9, 31.9, 28.3, 24.1, 14.5. **HRMS (ESI)** Calculated for  $\text{C}_{17}\text{H}_{23}\text{O}_3^+$  ( $[\text{M}+\text{H}]^+$ ) 275.1642. Found 275.1642.  $[\alpha]_{\text{D}}^{25} = +55.2$  ( $c = 1.35$ ,  $\text{CHCl}_3$ ).

### Determination of the relative configuration of diastereomers **6a** and **6b** by NMR spectroscopy

In the  $^1\text{H}$  NMR spectra of compound **6a** performed in  $\text{CDCl}_3$ , the signals of protons 2, 3 and 4 overlap in a complex multiplet, making it impossible to assign them by COSY and to study their relative configuration by NOESY. Gratifyingly, when the  $^1\text{H}$  NMR spectra of compound **6a** was recorded in  $\text{toluene-d}_8$ , the resonances of protons 2, 3 and 4 appear well resolved, thus allowing to determine their relative configuration by 2D-NMR.

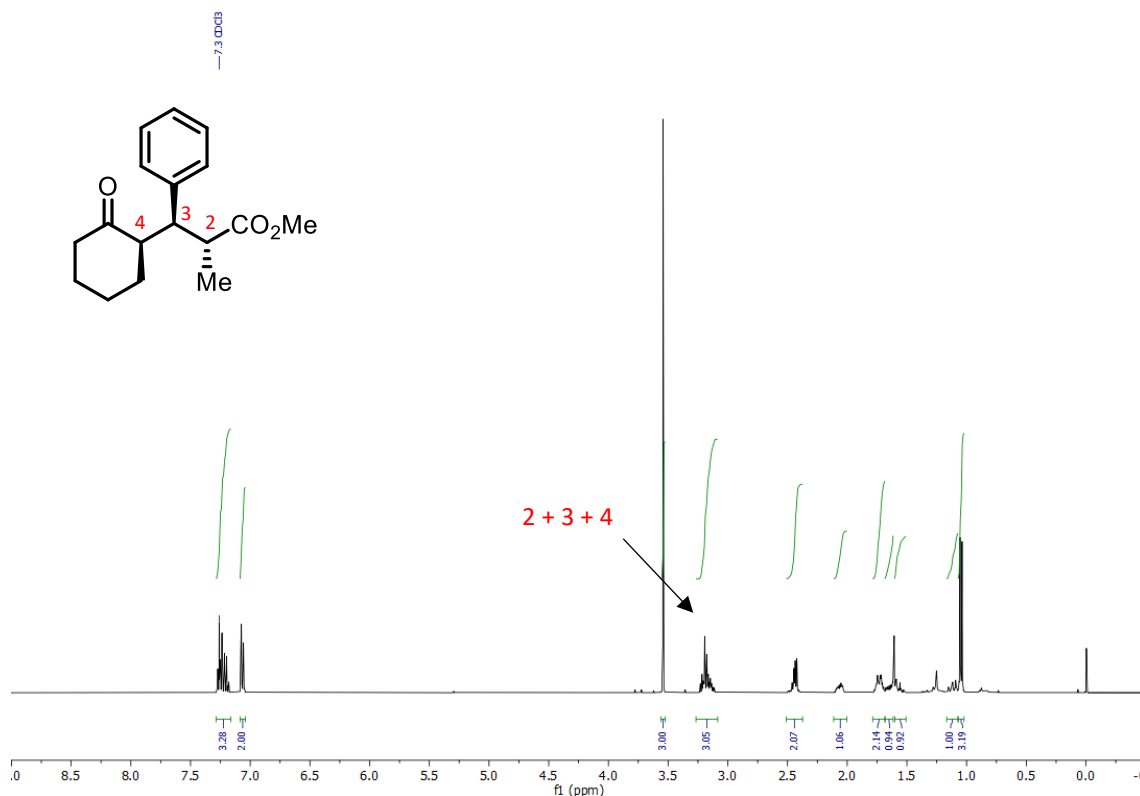

**Figure S53.**  $^1\text{H}$  NMR spectrum of **6a** at 400 MHz in  $\text{CDCl}_3$ .

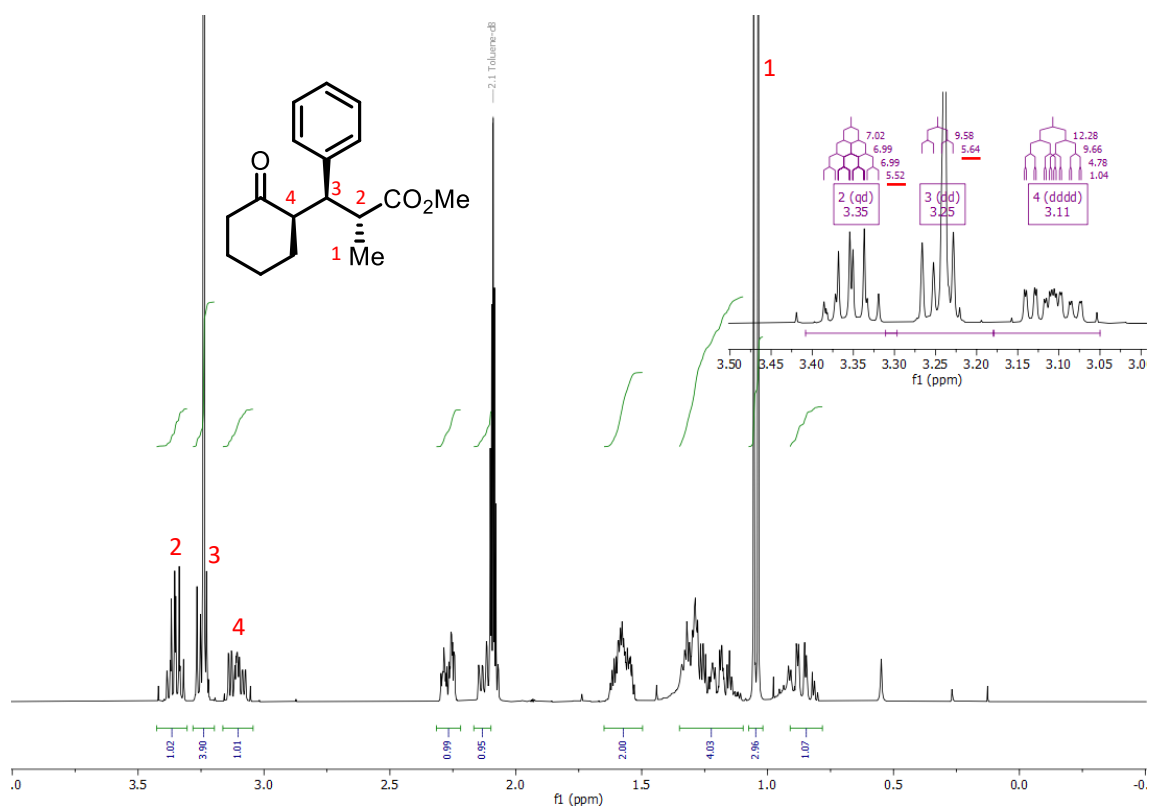

**Figure S54.** <sup>1</sup>H NMR spectrum of **6a** at 400 MHz in toluene-d<sub>8</sub>.

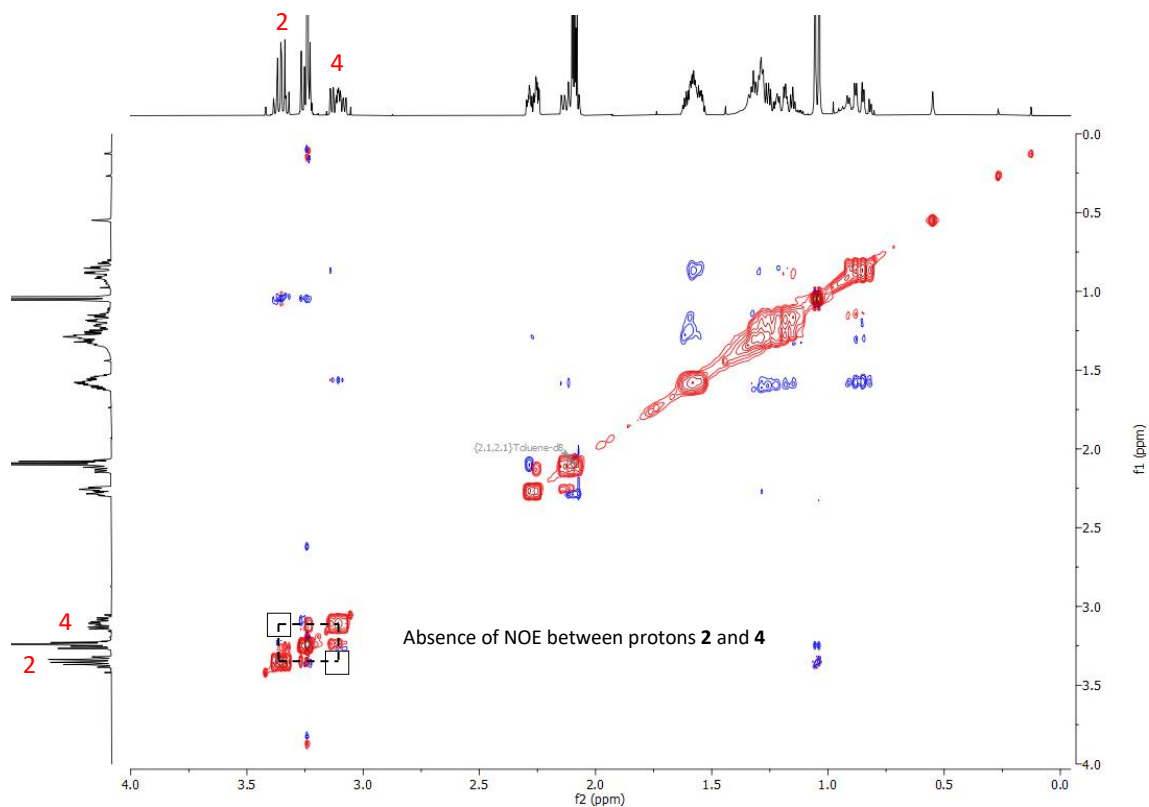

**Figure S55.** 2D NOESY spectrum of **6a** at 400 MHz in toluene-d<sub>8</sub>.

[The absence of NOE contact between protons **2** and **4** confirms their anti-configuration in **6a**. The analysis of the coupling constants also confirms the anti-configuration of **6a**:  $J_{(2-3)} = 5.6$  Hz.]

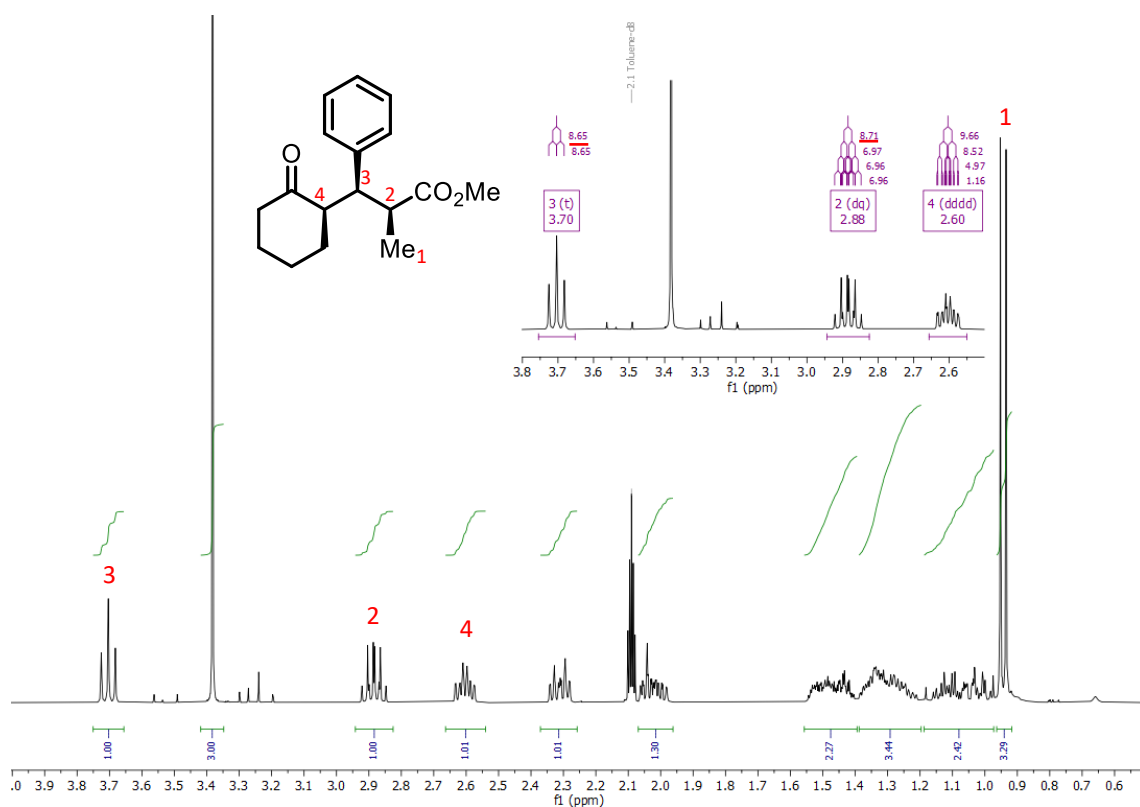

**Figure S56.** <sup>1</sup>H NMR spectrum of **6b** at 400 MHz in toluene-*d*<sub>8</sub>.

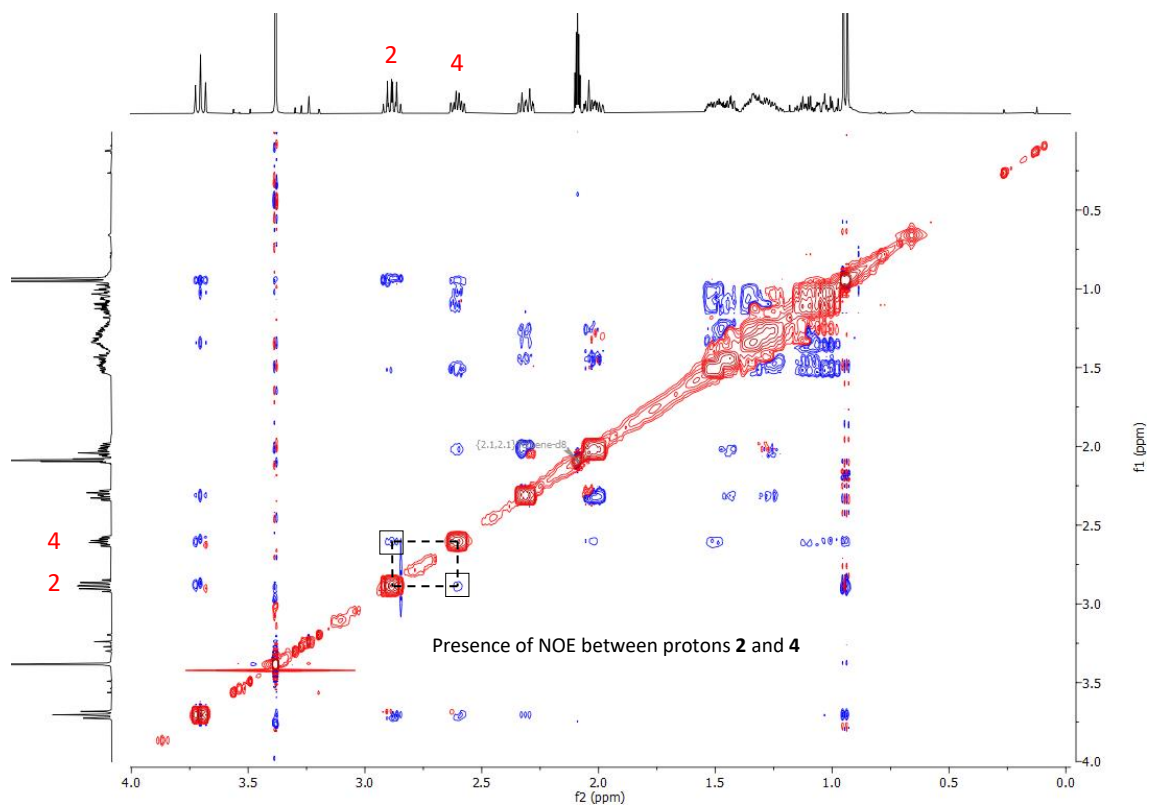

**Figure S57.** 2D NOESY spectrum of **6b** at 400 MHz in toluene-*d*<sub>8</sub>.

[The presence of NOE contact between protons **2** and **4** confirms the all-syn configuration of product **6b**. The analysis of the coupling constants also confirms the sin-configuration of **6b**:  $J_{(2-3)} = 8.7$  Hz.]

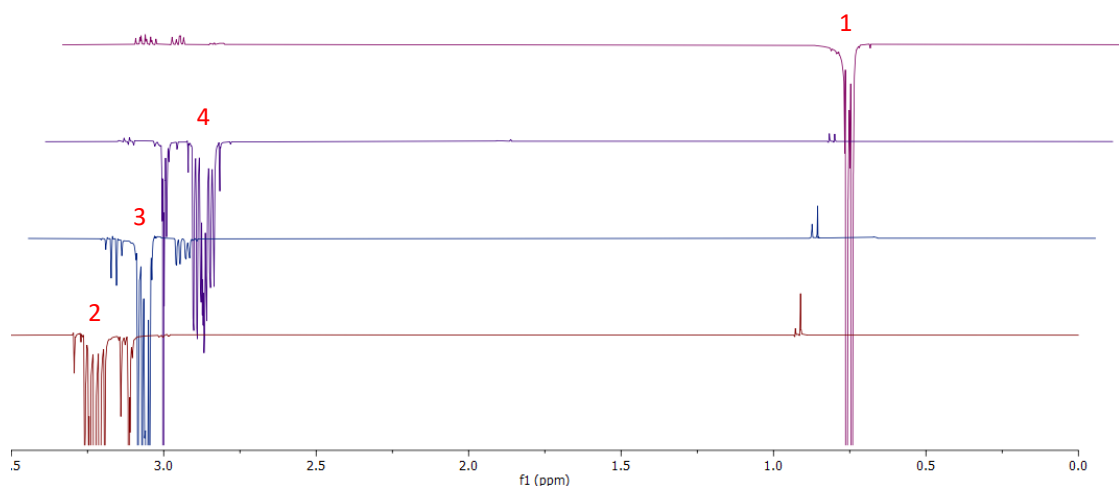

**Figure S58.** 1D NOE stacked spectra of **6a** at 400 MHz in toluene- $d_8$ .

*[When proton 4 is irradiated, proton 2 is not in antiphase and vice versa. Therefore, there is no NOE contact between protons 2 and 4. 1D NOE spectra confirm the assigned anti-configuration for 6a.]*

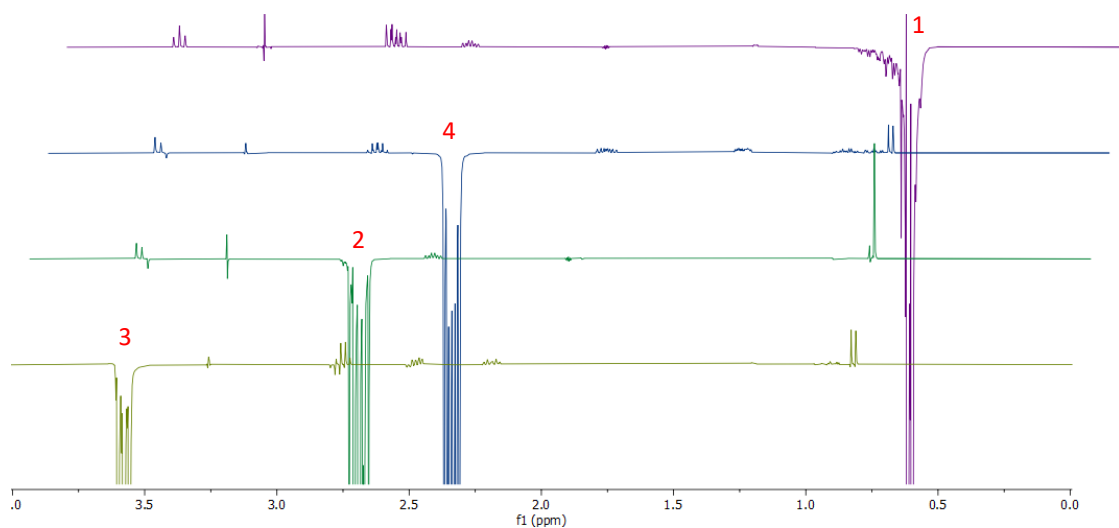

**Figure S59.** 1D NOE stacked spectra of **6b** at 400 MHz in toluene- $d_8$ .

*[When proton 4 is irradiated, proton 2 is in antiphase and vice versa. Therefore, there is NOE contact between protons 2 and 4. 1D NOE spectra confirm the assigned syn-configuration for 6b.]*

## K.2.Reduction and cyclization

### Reduction of the ketone

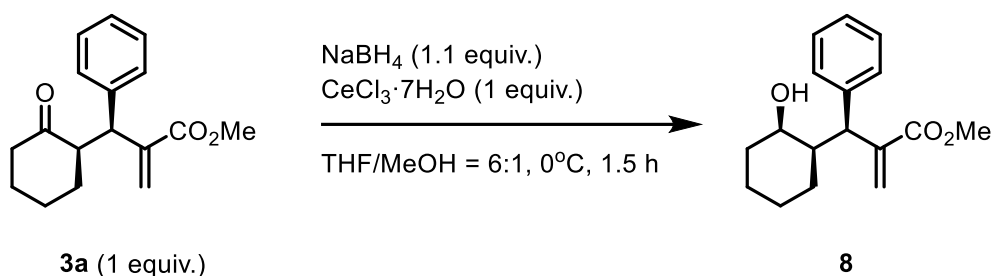

To a solution of compound **3a** (54,6 mg, 1 equiv., 0.2 mmol) in 4 mL of a mixture THF/MeOH = 6:1 (0.05 M) was added  $\text{CeCl}_3 \cdot 7\text{H}_2\text{O}$  (74,5 mg, 1 equiv., 0.2 mmol). The solution was cooled to 0 °C and  $\text{NaBH}_4$  (8.3 mg, 1.1 equiv., 0.22 mmol) was added. The reaction was carried at 0 °C until full conversion of the starting material was detected by TLC analysis. Then, the reaction mixture was quenched with a saturated solution of  $\text{NH}_4\text{Cl}$  (4 mL) and extracted with  $\text{CH}_2\text{Cl}_2$  (2 x 4 mL). The organic layers were collected, dried with anhydrous  $\text{MgSO}_4$  and concentrated under reduced pressure. The resulting crude was purified by flash column chromatography using hexane and ethyl acetate mixtures affording the desired product **8** (75% yield, d.r. >20:1) as a yellow oil.

### methyl 2-((S)-((1R,2R)-2-hydroxycyclohexyl)(phenyl)methyl)acrylate (**8**)

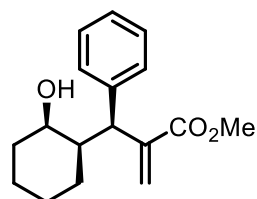

**$^1\text{H}$  NMR** (400 MHz,  $\text{CDCl}_3$ )  $\delta$  7.31-7.15 (5H, m), 6.33 (1H, s), 5.75 (1H, s), 3.98 (1H, bs), 3.89 (1H, d,  $J$  = 11.71 Hz), 3.74 (3H, s), 2.33 (1H, d,  $J$  = 4.23 Hz), 2.00 (1H, tdd,  $J$  = 11.71, 3.90, 2.14 Hz), 1.94-1.85 (1H, m), 1.69-1.53 (2H, m), 1.52-1.39 (2H, m), 1.32-1.19 (5H, m);  **$^{13}\text{C}$  NMR** (100 MHz,  $\text{CDCl}_3$ )  $\delta$  169.0, 142.8, 142.3, 128.7, 128.6, 126.6, 126.4, 66.4, 52.4, 48.6, 46.0, 33.5, 26.2, 25.1, 19.9. **HRMS (ESI)** Calculated for  $\text{C}_{17}\text{H}_{22}\text{NaO}_3^+$  ( $[\text{M}+\text{Na}]^+$ ) 297.1461. Found 297.1462.  $[\alpha]_{\text{D}}^{25}$  = -11.5 ( $c$  = 0.60),  $\text{CHCl}_3$ ).

# Determination of the relative configuration of **8** by 2D NOESY

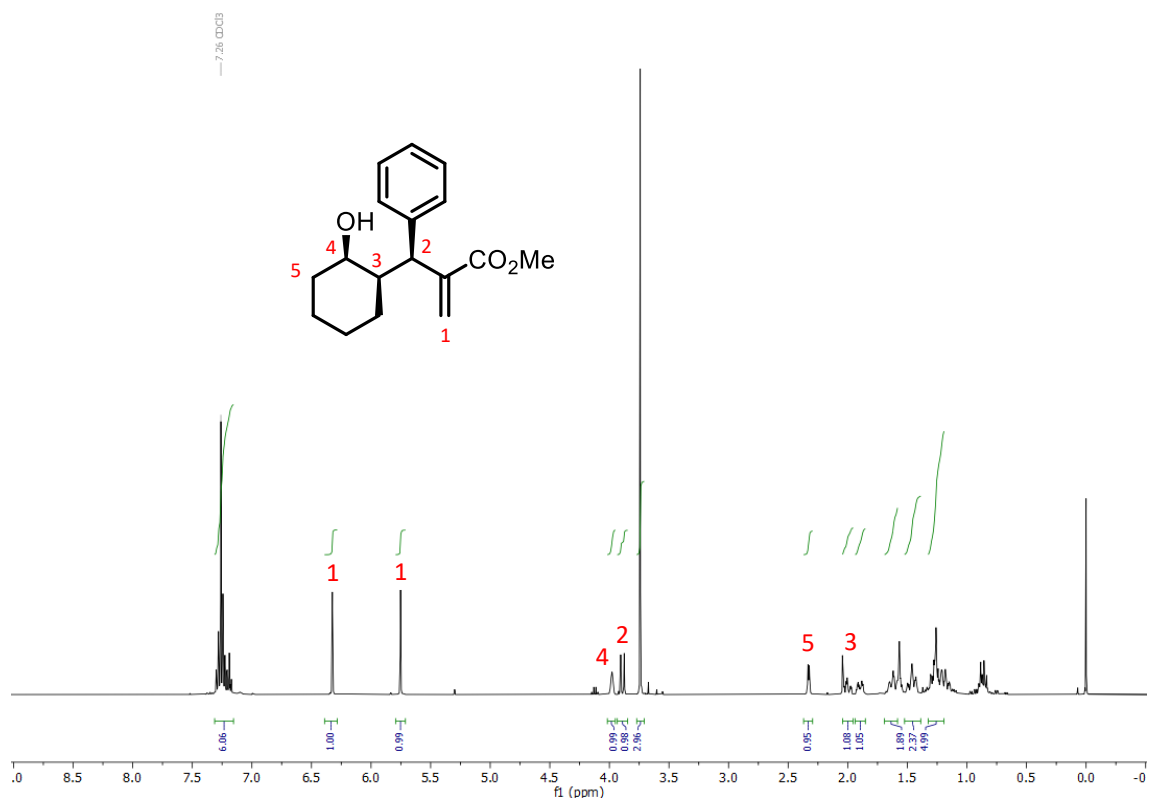

**Figure S60.** <sup>1</sup>H NMR spectrum of **8** at 400 MHz in CDCl<sub>3</sub>.

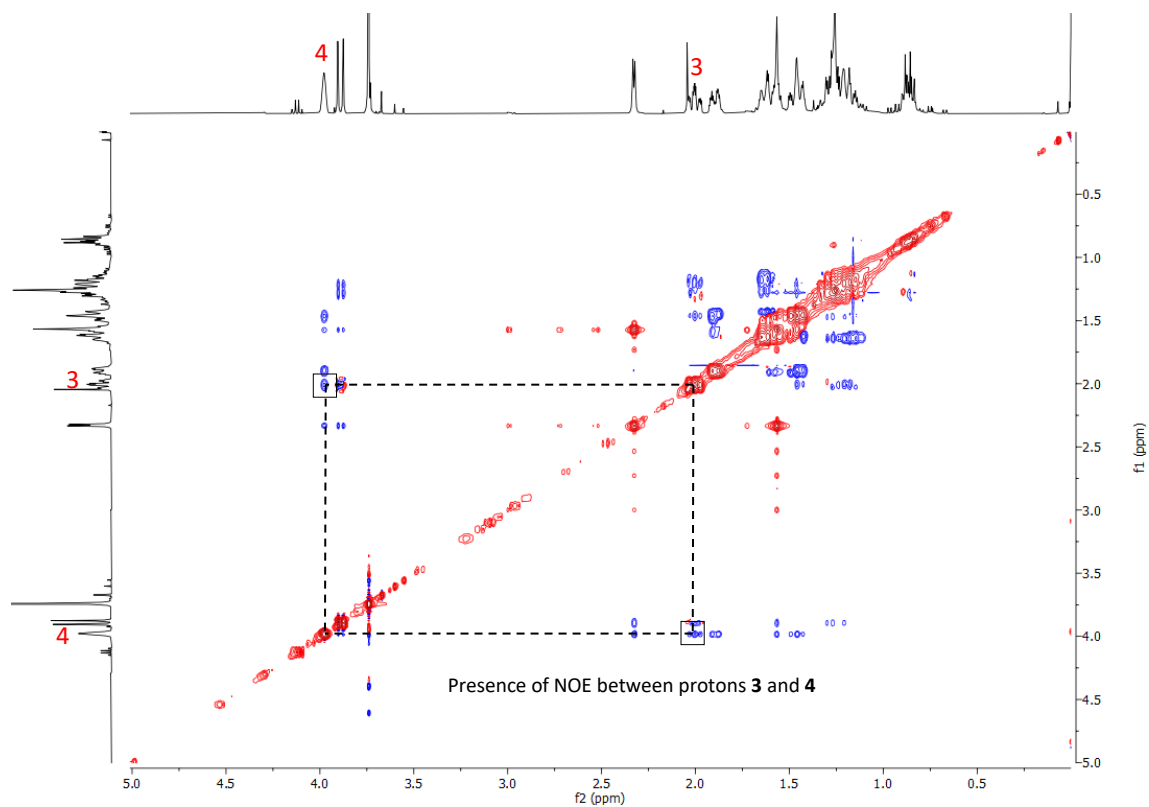

**Figure S61.** 2D NOESY spectrum of **8** at 400 MHz in CDCl<sub>3</sub>.

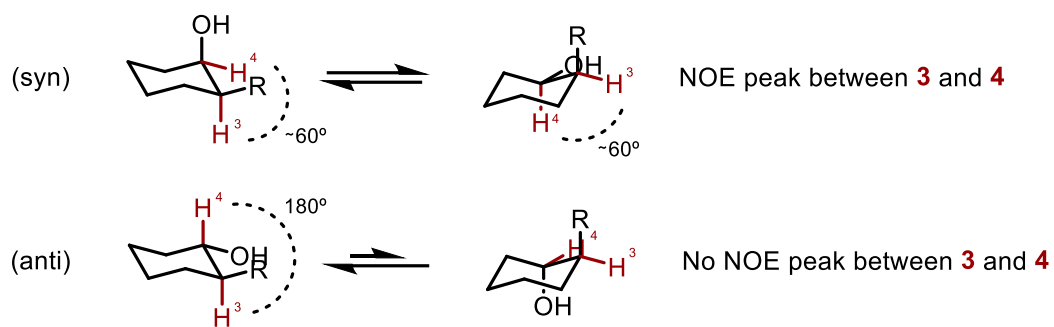

The most favoured conformation for the *anti*-product is the one with the protons **3** and **4** in axial position (no NOE peak) while the bulkier groups (R and OH) are in equatorial position. In the NOESY spectrum, there is a NOE contact between proton **3** and **4**. Therefore, the alcohol moiety in **8** is in *syn*-configuration respect the other two stereocenters.

## Lactonization

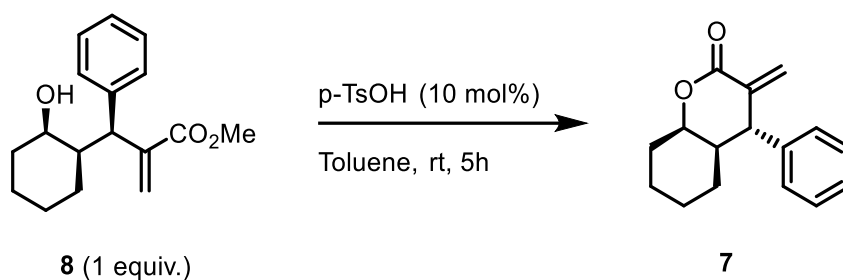

To a solution of compound **8** (41.2 mg, 1 equiv., 0.15 mmol) in 1.5 mL of toluene (0.1 M) was added p-TsOH (3.8 mg, 0.1 equiv., 0.02 mmol). The lactonization was carried out at room temperature until full conversion of the starting material was detected by TLC analysis. Then, the reaction mixture was directly purified by flash column chromatography using hexane and ethyl acetate mixtures affording the desired product **7** (85% yield) as a colourless solid.

### (4S,4aR,8aR)-3-methylene-4-phenyloctahydro-2H-chromen-2-one (**7**)

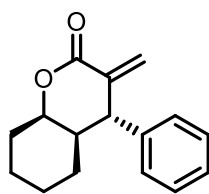

**<sup>1</sup>H NMR** (400 MHz, CDCl<sub>3</sub>)  $\delta$  7.38-7.29 (2H, m), 7.28-7.22 (1H, m), 7.18-7.11 (2H, m), 6.71 (1H, t,  $J = 4.16$  Hz), 5.55 (1H, t,  $J = 1.47$  Hz), 4.47 (1H, dt,  $J = 5.29, 2.93$  Hz), 3.81 (1H, d,  $J = 3.97$  Hz), 2.08-1.92 (2H, m), 1.79-1.68 (1H, m), 1.68-1.75 (2H, m), 1.53-1.43 (3H, m), 1.43-1.32 (1H, m); **<sup>13</sup>C NMR** (100 MHz, CDCl<sub>3</sub>)  $\delta$  166.2, 142.8, 135.5, 132.2, 128.9, 127.9, 127.1, 75.2, 48.6, 41.5, 30.4, 27.0, 24.2, 20.3. **HRMS (ESI)** Calculated for C<sub>16</sub>H<sub>19</sub>O<sub>2</sub><sup>+</sup> ([M+H]<sup>+</sup>) 243.1383. Found 243.1380.  **$[\alpha]_D^{25}$**  = -91.5 (c = 2.05, CHCl<sub>3</sub>).

# Determination of the relative configuration **7** by 2D NOESY

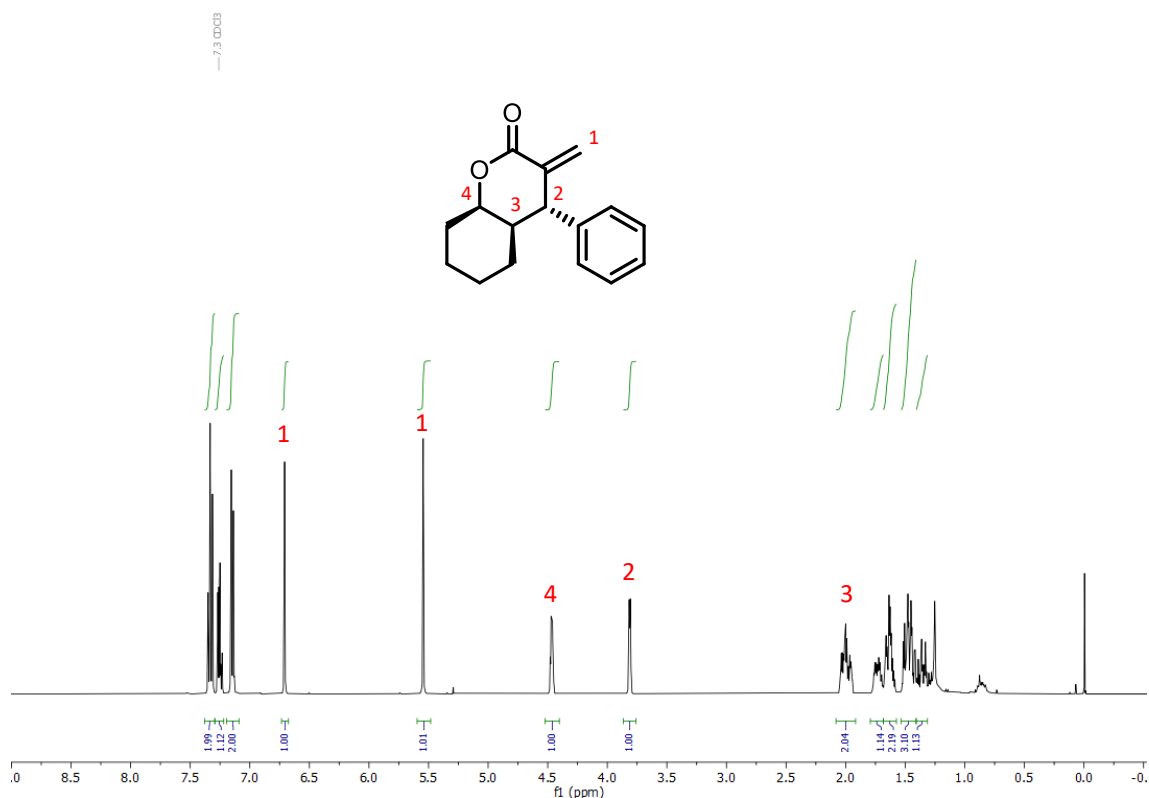

**Figure S62.**  $^1\text{H}$  NMR spectrum of **7** at 400 MHz in  $\text{CDCl}_3$ .

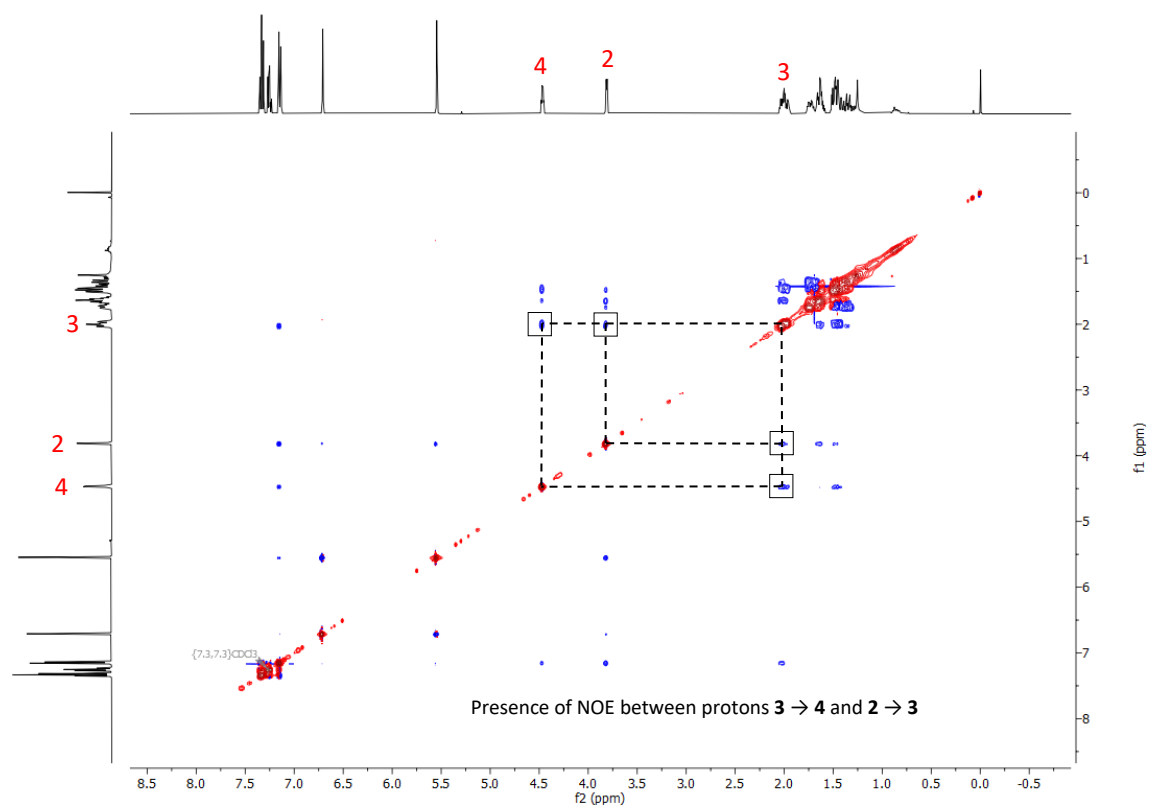

**Figure S63.** 2D NOESY spectrum of **7** at 400 MHz in  $\text{CDCl}_3$ .

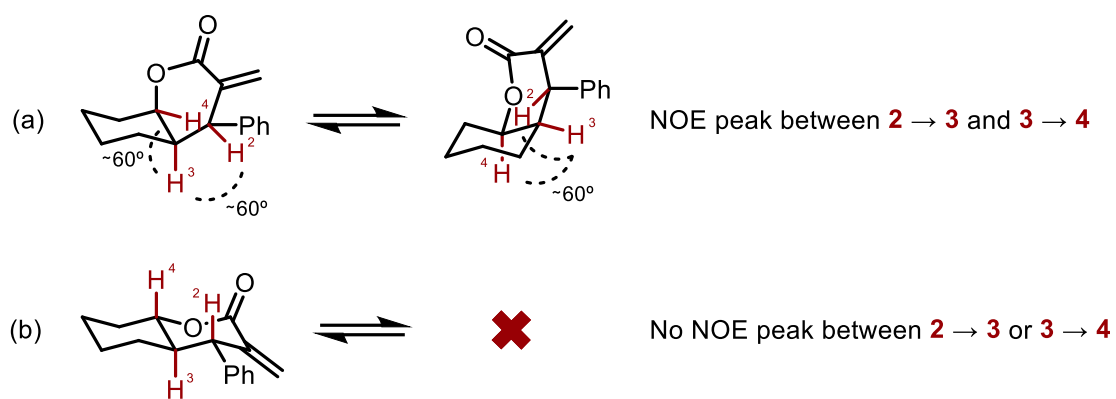

Protons **2** – **3** and **3** – **4** for lactone (a) are at *ca.* 60° in both conformers. In the NOESY spectrum, there are NOE contacts between protons **2** – **3** and **3** – **4**. Conversely, lactone (b) should show a NOE peak between protons **2** – **4**, which is not observed in the NOESY spectrum. Therefore, lactone **7** possesses a *cis*-decalin-like structure.

## L. References

- [1] Waligora, L.; Galinski, M.; Lewandowski, A. *Electroanalysis*, **2009**, *21*, 2221-2227.
- [2] Companyó, X.; Geant, P.-Y.; Mazzanti, A.; Moyano, A.; Rios, R. *Tetrahedron* **2014**, *70*, 75-83.
- [3] (a) Santos, M. S.; Coelho, F. *RSC Adv.* **2012**, *2*, 3237-3241. (b) Huang, F-F.; Lin, S-Y.; Liu, X-L.; Huang, X.; Sheng, S-R. *Synthesis* **2007**, *9*, 1373-1377. (c) Helppi, M. A.; Lehmkühler, A. L.; Marchi, J. M.; Schmidt, C. M.; Yip-Schneider, M. T.; Ramachandran, P. V.; *Bioorg. Med. Chem. Lett.* **2015**, *25*, 4270-4273. (d) Rasson, C.; Stouse, A.; Boreux, A.; Cirriez, V.; Riant, O. *Chem. Eur. J.* **2018**, *24*, 9234-9237. (e) Jacobsen, E.; Chavda, M. K.; Zikpi, K. M.; Waggoner, S. L.; Passini, D. J.; Wolfe, J. A.; Larson, R.; Beckley, C.; Hamaker, C. G.; Hitchcock, S. R. *Tetr. Lett.*, **2017**, *58*, 3073-3077. (f) Akins, N. S.; Mishra, N.; Harris, H. M.; Dudhipala, N.; Kim, S. J.; Keasling, A. W.; Majumdar, S.; Zjawiony, J. K.; Paris, J. J.; Ashpole, N. M.; Le, H. V. *Chem. Med. Chem.*, **2022**, *17*, e202100684. (g) Fort, Y.; Berthe, M. C.; Caubere, P. *Tetrahedron*, **1992**, *48*, 6371-6384. (h) Poly, W.; Schomburg, D.; Hoffmann, H. M. R. *J. Org. Chem.* **1988**, *53*, 3701-3710.
- [4] Nishimine, T.; Fukushi, K.; Shibata, N.; Taira, H.; Tokunaga, E.; Yamano, A.; Shiro, M.; Shibata, N. *Angew. Chem. Int. Ed.*, **2014**, *53*, 517-520.
- [5] (a) Zi, Y.; Lange, M.; Schultz, C.; Vilotijevic, I. *Angew. Chem. Int. Ed.*, **2019**, *58*, 10727-10731. (b) Nishimine, T.; Taira, H.; Tokunaga, E.; Shiro, M.; Shibata, N. *Angew. Chem. Int. Ed.*, **2016**, *55*, 359-363.
- [6] Loy, N.; Subin, C.; Kim, S.; Park, C-M. *Chem. Commun.* **2016**, *52*, 7336-7339.
- [7] (a) Ohmatsu, K.; Nakashima, T.; Sato, M.; Ooi, T. *Nat. Commun.* **2019**, *10*, 2706-2713. (b) Yu, J-Q.; Wu, H-C.; Corey, E. J. *Org. Lett.* **2005**, *7*, 1415-1417. (c) Zhang, J.; Wang, L.; Liu, Q.; Yang, Z.; Huang, Y. *Chem. Commun.* **2013**, *49*, 11662-11664. (d) Khan, I.; Reed-Berendt, B. G.; Melen, R. L.; Morrill, L. C. *Angew. Chem. Int. Ed.* **2018**, *57*, 12356-12359. (e) Kang, T.; Cao, W.; Hou, L.; Tang, Q.; Zou, S.; Liu, X.; Feng, X. *Angew. Chem. Int. Ed.* **2019**, *58*, 2464-2468. (f) US 4992591, A, **1991** – MERCK & CO INK. (g) Hayashi, M.; Shibuya, M.; Iwabuchi, Y. *Synlett* **2012**, *23*, 1025-1030.
- [8] (a) Sousa e Silva, F. C.; Van, N. T.; Wengryniuk, S. E. *J. Am. Chem. Soc.* **2020**, *142*, 64–69. (b) Takasu, K.; Ishii, T.; Inanaga, K.; Ihara, M.; *Org. Synth.* **2006**, *83*, 193-199.
- [9] Huang, J.; Zhang, R.; Wu, X.; Dong, G.; Xia, Y. *Org. Lett.* **2022**, *24*, 2436-2440.
- [10] (a) Vogt, C. D.; Bart, A. G.; Yadav, R.; Scott, E. E.; Aubé, J. *Org. Biomol. Chem.* **2021**, *19*, 7664-7669. (b) Orban, J.; Turner, J. V.; Twitchin, B. *Tetr. Lett.* **1984**, *25*, 5099-5102.
- [11] Wang, W-X.; Zhang, Q-Z.; Zhang, T-Q.; Li, Z-S.; Zhang, W.; Yu, W. *Adv. Synth. Catal.* **2015**, *357*, 221-226.
- [12] Jameleddine, K.; Yakhdhan, K.; Jamil, K.; Bechir, B. H.; Denis, G. *Synth. Comm.* **2002**, *32*, 2719-2722.
- [13] Sun, H.; DiMagno, S. G. *J. Am. Chem. Soc.* **2005**, *127*, 7, 2050-2051.
- [14] Sandford, C.; Edwards, M. A.; Klunder, K. J.; Hickey, D. P.; Li, M.; Barman, K.; Sigman, M. S.; White, H. S.; Minter, S. D. *Chem. Sci.* **2019**, *10*, 6404-6422.
- [15] Veronesi, M.; Vulpetti, A.; Dalvit, C. *J. Mag. Resson. Open* **2022**, *12-13*, 100070.
- [16] (a) Tandura, S. N.; Voronkov, M. G.; Alekseev, N. V. *Top. Curr. Chem.* **1986**, *131*, 99-189. (b) Denmark, S. E.; Beutner, G. L. *Angew. Chem. Int. Ed.* **2008**, *47*, 1560-1638.

- [17] Sumii, Y.; Nagasaka, T.; Wang, J.; Uno, H.; Shibata, N. *J. Org. Chem.* **2020**, *85*, 15699-15707.
- [18] (a) Okusu, S.; Okazaki, H.; Tokunaga, W.; Soloshonok, V. A.; Shibata, N. *Angew. Chem. Int. Ed.* **2016**, *55*, 6744-6748. (b) Nishimine, T.; Taira, H.; Mori, S.; Matsubara, O.; Tokunaga, E.; Akiyama, H.; Soloshonok, V. A.; Shibata, N. *Chem. Commun.* **2017**, *53*, 1128-1131.

## M. Determination of the absolute configuration. X-Ray Crystallographic Data of compound **3w**

A colourless prism-like specimen of  $C_{17}H_{19}BrO_3$ , approximate dimensions 0.063mm x 0.118mm x 0.306mm, was used for the X-ray crystallographic analysis. The X-ray intensity data were measured. The integration of the data using an orthorhombic unit cell yielded a total of 38606 reflections to a maximum  $\theta$  angle of  $30.56^\circ$  ( $0.70\text{\AA}$  resolution), of which 4799 were independent (average redundancy 8.045, completeness = 99.7%,  $R_{\text{int}} = 5.48\%$ ,  $R_{\text{sig}} = 4.01\%$ ) and 4258 (88.73%) were greater than  $2\sigma(F^2)$ . The final cell constants of  $a = 9.3235(17)\text{\AA}$ ,  $b = 9.838(2)\text{\AA}$ ,  $c = 17.181(4)\text{\AA}$ , volume =  $1575.9(6)\text{\AA}^3$ , are based upon the refinement of the XYZ-centroids of reflections above  $20\sigma(I)$ . The calculated minimum and maximum transmission coefficients (based on crystal size) are 0.5995 and 0.7461.

The structure was solved and refined using the Bruker SHELXTL Software Package, using the space group P 21 21 21, with  $Z = 4$  for the formula unit  $C_{17}H_{19}BrO_3$ . The final anisotropic full-matrix least-squares refinement on  $F^2$  with 191 variables converged at  $R1 = 2.53\%$ , for the observed data and  $wR2 = 5.24\%$  for all data. The goodness-of-fit was 1.024. The largest peak in the final difference electron density synthesis was  $0.271\text{e}^-/\text{\AA}^3$  and the largest hole was  $-0.473\text{e}^-/\text{\AA}^3$  with an RMS deviation of  $0.061\text{e}^-/\text{\AA}^3$ . On the basis of the final model, the calculated density was  $1.480\text{g/cm}^3$  and  $F(000)$ , 720  $e^-$ .

The specific refinement details are embedded in the CIF files given as Supplementary Materials and that have been deposited with the Cambridge Crystallographic Data Centre as supplementary publication (CCDC 2226509).

**Table S5.** Crystal data and structure refinement for **3w**.

|                                                          |                                                                                                                                                      |
|----------------------------------------------------------|------------------------------------------------------------------------------------------------------------------------------------------------------|
| <b>Identification code</b>                               | <b>3w</b>                                                                                                                                            |
| <b>Empirical formula</b>                                 | $C_{17}H_{19}BrO_3$                                                                                                                                  |
| <b>Formula weight</b>                                    | 351.23                                                                                                                                               |
| <b>Temperature</b>                                       | 100(2) K                                                                                                                                             |
| <b>Wavelength</b>                                        | $0.71073\text{\AA}$                                                                                                                                  |
| <b>Crystal system</b>                                    | Orthorhombic                                                                                                                                         |
| <b>Space group</b>                                       | P 21 21 21                                                                                                                                           |
| <b>Unit cell dimensions</b>                              | $a = 9.3235(17)\text{\AA}$ $\alpha = 90^\circ$ .<br>$b = 9.838(2)\text{\AA}$ $\beta = 90^\circ$ .<br>$c = 17.181(4)\text{\AA}$ $\gamma = 90^\circ$ . |
| <b>Volume</b>                                            | $1575.9(6)\text{\AA}^3$                                                                                                                              |
| <b>Z</b>                                                 | 4                                                                                                                                                    |
| <b>Density (calculated)</b>                              | $1.480\text{ Mg/m}^3$                                                                                                                                |
| <b>Absorption coefficient</b>                            | $2.616\text{ mm}^{-1}$                                                                                                                               |
| <b><math>F(000)</math></b>                               | 720                                                                                                                                                  |
| <b>Crystal size</b>                                      | $0.306 \times 0.118 \times 0.063\text{ mm}^3$                                                                                                        |
| <b>Theta range for data collection</b>                   | $2.371$ to $30.555^\circ$ .                                                                                                                          |
| <b>Index ranges</b>                                      | $-13 \leq h \leq 12$ , $-13 \leq k \leq 14$ , $-24 \leq l \leq 24$                                                                                   |
| <b>Reflections collected</b>                             | 38606                                                                                                                                                |
| <b>Independent reflections</b>                           | 4799 [ $R(\text{int}) = 0.0548$ ]                                                                                                                    |
| <b>Completeness to theta = <math>25.242^\circ</math></b> | 100.0 %                                                                                                                                              |
| <b>Absorption correction</b>                             | Semi-empirical from equivalents                                                                                                                      |
| <b>Max. and min. transmission</b>                        | 0.7461 and 0.5995                                                                                                                                    |
| <b>Refinement method</b>                                 | Full-matrix least-squares on $F^2$                                                                                                                   |
| <b>Data / restraints / parameters</b>                    | 4799 / 0 / 191                                                                                                                                       |
| <b>Goodness-of-fit on <math>F^2</math></b>               | 1.024                                                                                                                                                |

|                                         |                                    |
|-----------------------------------------|------------------------------------|
| <b>Final R indices [I&gt;2sigma(I)]</b> | R1 = 0.0253, wR2 = 0.0490          |
| <b>R indices (all data)</b>             | R1 = 0.0348, wR2 = 0.0524          |
| <b>Absolute structure parameter</b>     | 0.010(4)                           |
| <b>Extinction coefficient</b>           | n/a                                |
| <b>Largest diff. peak and hole</b>      | 0.271 and -0.473 e.Å <sup>-3</sup> |

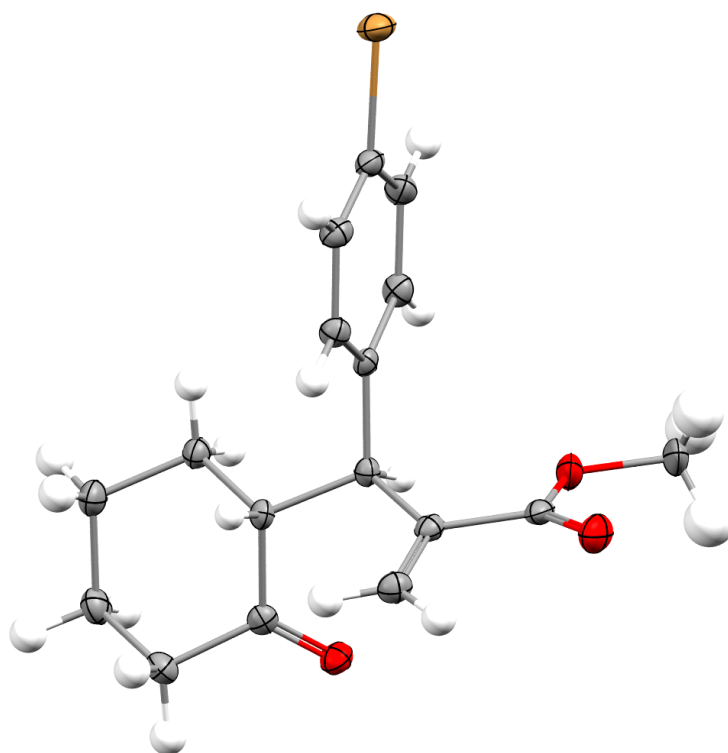

**Figure S64.** Crystal structure of compound **3w**. Thermal ellipsoids drawn at the 50% probability level.

**Table S6.** Atomic coordinates ( $\times 10^4$ ) and equivalent isotropic displacement parameters ( $\text{\AA}^2 \times 10^3$ ) for **3w**.  $U(\text{eq})$  is defined as one third of the trace of the orthogonalized  $U_{ij}$  tensor.

|       | x        | y       | z       | $U(\text{eq})$ |
|-------|----------|---------|---------|----------------|
| Br(1) | 10643(1) | 6850(1) | 4350(1) | 26(1)          |
| O(1)  | 8686(2)  | 1341(2) | 6468(1) | 25(1)          |
| O(2)  | 4455(2)  | 1856(2) | 7145(1) | 21(1)          |
| O(3)  | 9675(2)  | 1953(2) | 7605(1) | 29(1)          |
| C(1)  | 9826(3)  | 356(3)  | 6379(2) | 34(1)          |
| C(2)  | 8738(2)  | 2076(2) | 7123(1) | 18(1)          |
| C(3)  | 7505(2)  | 3043(3) | 7190(1) | 16(1)          |
| C(4)  | 6669(2)  | 3359(2) | 6452(1) | 14(1)          |
| C(5)  | 7599(2)  | 4240(2) | 5924(1) | 14(1)          |
| C(6)  | 7923(3)  | 3825(2) | 5170(1) | 18(1)          |
| C(7)  | 8818(3)  | 4598(3) | 4689(1) | 21(1)          |
| C(8)  | 9371(3)  | 5800(2) | 4977(1) | 18(1)          |
| C(9)  | 5203(2)  | 4015(2) | 6616(1) | 14(1)          |
| C(10) | 4204(2)  | 3063(3) | 7054(1) | 16(1)          |
| C(11) | 2797(2)  | 3695(3) | 7288(1) | 21(1)          |
| C(12) | 2000(2)  | 4113(3) | 6539(1) | 23(1)          |
| C(13) | 2932(3)  | 5045(3) | 6039(2) | 23(1)          |
| C(14) | 4405(2)  | 4417(2) | 5864(1) | 18(1)          |
| C(15) | 7259(2)  | 3585(2) | 7883(1) | 20(1)          |
| C(16) | 8170(2)  | 5458(2) | 6191(1) | 17(1)          |
| C(17) | 9056(2)  | 6250(2) | 5722(1) | 18(1)          |

**Table S7.** Bond lengths [ $\text{\AA}$ ] and angles [ $^\circ$ ] for **3w**.

|            |          |
|------------|----------|
| Br(1)-C(8) | 1.906(2) |
| O(1)-C(2)  | 1.339(3) |
| O(1)-C(1)  | 1.446(3) |
| O(2)-C(10) | 1.220(3) |
| O(3)-C(2)  | 1.210(3) |
| C(1)-H(1)  | 0.9800   |
| C(1)-H(13) | 0.9800   |
| C(1)-H(14) | 0.9800   |
| C(2)-C(3)  | 1.496(3) |
| C(3)-C(15) | 1.324(3) |
| C(3)-C(4)  | 1.522(3) |
| C(4)-C(5)  | 1.526(3) |
| C(4)-C(9)  | 1.538(3) |
| C(4)-H(3)  | 1.0000   |
| C(5)-C(16) | 1.389(3) |
| C(5)-C(6)  | 1.390(3) |
| C(6)-C(7)  | 1.399(3) |
| C(6)-H(2)  | 0.9500   |
| C(7)-C(8)  | 1.382(3) |
| C(7)-H(19) | 0.9500   |
| C(8)-C(17) | 1.386(3) |
| C(9)-C(10) | 1.520(3) |

|                  |            |
|------------------|------------|
| C(9)-C(14)       | 1.543(3)   |
| C(9)-H(4)        | 1.0000     |
| C(10)-C(11)      | 1.507(3)   |
| C(11)-C(12)      | 1.541(3)   |
| C(11)-H(12)      | 0.9900     |
| C(11)-H(11)      | 0.9900     |
| C(12)-C(13)      | 1.527(3)   |
| C(12)-H(10)      | 0.9900     |
| C(12)-H(5)       | 0.9900     |
| C(13)-C(14)      | 1.536(3)   |
| C(13)-H(6)       | 0.9900     |
| C(13)-H(7)       | 0.9900     |
| C(14)-H(8)       | 0.9900     |
| C(14)-H(9)       | 0.9900     |
| C(15)-H(15)      | 0.9500     |
| C(15)-H(16)      | 0.9500     |
| C(16)-C(17)      | 1.393(3)   |
| C(16)-H(17)      | 0.9500     |
| C(17)-H(18)      | 0.9500     |
|                  |            |
| C(2)-O(1)-C(1)   | 115.1(2)   |
| O(1)-C(1)-H(1)   | 109.5      |
| O(1)-C(1)-H(13)  | 109.5      |
| H(1)-C(1)-H(13)  | 109.5      |
| O(1)-C(1)-H(14)  | 109.5      |
| H(1)-C(1)-H(14)  | 109.5      |
| H(13)-C(1)-H(14) | 109.5      |
| O(3)-C(2)-O(1)   | 123.2(2)   |
| O(3)-C(2)-C(3)   | 124.4(2)   |
| O(1)-C(2)-C(3)   | 112.38(18) |
| C(15)-C(3)-C(2)  | 117.3(2)   |
| C(15)-C(3)-C(4)  | 125.4(2)   |
| C(2)-C(3)-C(4)   | 117.30(19) |
| C(3)-C(4)-C(5)   | 108.71(17) |
| C(3)-C(4)-C(9)   | 112.82(17) |
| C(5)-C(4)-C(9)   | 112.08(17) |
| C(3)-C(4)-H(3)   | 107.7      |
| C(5)-C(4)-H(3)   | 107.7      |
| C(9)-C(4)-H(3)   | 107.7      |
| C(16)-C(5)-C(6)  | 118.5(2)   |
| C(16)-C(5)-C(4)  | 120.8(2)   |
| C(6)-C(5)-C(4)   | 120.7(2)   |
| C(5)-C(6)-C(7)   | 121.3(2)   |
| C(5)-C(6)-H(2)   | 119.3      |
| C(7)-C(6)-H(2)   | 119.3      |
| C(8)-C(7)-C(6)   | 118.5(2)   |
| C(8)-C(7)-H(19)  | 120.8      |
| C(6)-C(7)-H(19)  | 120.8      |
| C(7)-C(8)-C(17)  | 121.6(2)   |
| C(7)-C(8)-Br(1)  | 119.61(17) |
| C(17)-C(8)-Br(1) | 118.73(17) |
| C(10)-C(9)-C(4)  | 112.10(18) |
| C(10)-C(9)-C(14) | 106.12(17) |
| C(4)-C(9)-C(14)  | 112.47(17) |
| C(10)-C(9)-H(4)  | 108.7      |

|                   |            |
|-------------------|------------|
| C(4)-C(9)-H(4)    | 108.7      |
| C(14)-C(9)-H(4)   | 108.7      |
| O(2)-C(10)-C(11)  | 122.3(2)   |
| O(2)-C(10)-C(9)   | 123.07(19) |
| C(11)-C(10)-C(9)  | 114.3(2)   |
| C(10)-C(11)-C(12) | 107.92(19) |
| C(10)-C(11)-H(12) | 110.1      |
| C(12)-C(11)-H(12) | 110.1      |
| C(10)-C(11)-H(11) | 110.1      |
| C(12)-C(11)-H(11) | 110.1      |
| H(12)-C(11)-H(11) | 108.4      |
| C(13)-C(12)-C(11) | 110.8(2)   |
| C(13)-C(12)-H(10) | 109.5      |
| C(11)-C(12)-H(10) | 109.5      |
| C(13)-C(12)-H(5)  | 109.5      |
| C(11)-C(12)-H(5)  | 109.5      |
| H(10)-C(12)-H(5)  | 108.1      |
| C(12)-C(13)-C(14) | 112.2(2)   |
| C(12)-C(13)-H(6)  | 109.2      |
| C(14)-C(13)-H(6)  | 109.2      |
| C(12)-C(13)-H(7)  | 109.2      |
| C(14)-C(13)-H(7)  | 109.2      |
| H(6)-C(13)-H(7)   | 107.9      |
| C(13)-C(14)-C(9)  | 111.67(18) |
| C(13)-C(14)-H(8)  | 109.3      |
| C(9)-C(14)-H(8)   | 109.3      |
| C(13)-C(14)-H(9)  | 109.3      |
| C(9)-C(14)-H(9)   | 109.3      |
| H(8)-C(14)-H(9)   | 107.9      |
| C(3)-C(15)-H(15)  | 120.0      |
| C(3)-C(15)-H(16)  | 120.0      |
| H(15)-C(15)-H(16) | 120.0      |
| C(5)-C(16)-C(17)  | 121.3(2)   |
| C(5)-C(16)-H(17)  | 119.4      |
| C(17)-C(16)-H(17) | 119.4      |
| C(8)-C(17)-C(16)  | 118.8(2)   |
| C(8)-C(17)-H(18)  | 120.6      |
| C(16)-C(17)-H(18) | 120.6      |

---

Symmetry transformations used to generate equivalent atoms:

**Table S8.** Anisotropic displacement parameters ( $\text{\AA}^2 \times 10^3$ ) for **3w**. The anisotropic displacement factor exponent takes the form:  $-2\pi^2 [h^2 a^{*2} U^{11} + \dots + 2 h k a^* b^* U^{12}]$

|       | U <sup>11</sup> | U <sup>22</sup> | U <sup>33</sup> | U <sup>23</sup> | U <sup>13</sup> | U <sup>12</sup> |
|-------|-----------------|-----------------|-----------------|-----------------|-----------------|-----------------|
| Br(1) | 24(1)           | 29(1)           | 25(1)           | 11(1)           | 3(1)            | -3(1)           |
| O(1)  | 27(1)           | 24(1)           | 24(1)           | 3(1)            | 2(1)            | 13(1)           |
| O(2)  | 21(1)           | 17(1)           | 23(1)           | 2(1)            | -1(1)           | -2(1)           |
| O(3)  | 20(1)           | 37(1)           | 30(1)           | 9(1)            | -6(1)           | 4(1)            |
| C(1)  | 36(1)           | 31(2)           | 35(2)           | 10(1)           | 13(1)           | 21(1)           |
| C(2)  | 16(1)           | 20(1)           | 19(1)           | 8(1)            | 1(1)            | -1(1)           |
| C(3)  | 15(1)           | 15(1)           | 18(1)           | 3(1)            | -1(1)           | -2(1)           |
| C(4)  | 14(1)           | 13(1)           | 15(1)           | -1(1)           | -1(1)           | 2(1)            |
| C(5)  | 13(1)           | 15(1)           | 14(1)           | 2(1)            | -2(1)           | 2(1)            |
| C(6)  | 22(1)           | 16(1)           | 18(1)           | -2(1)           | -1(1)           | 0(1)            |
| C(7)  | 25(1)           | 22(1)           | 16(1)           | 0(1)            | 2(1)            | 4(1)            |
| C(8)  | 16(1)           | 20(1)           | 19(1)           | 7(1)            | 0(1)            | 0(1)            |
| C(9)  | 15(1)           | 12(1)           | 16(1)           | -1(1)           | -1(1)           | 1(1)            |
| C(10) | 16(1)           | 19(1)           | 13(1)           | -2(1)           | -3(1)           | 0(1)            |
| C(11) | 17(1)           | 24(1)           | 24(1)           | 1(1)            | 4(1)            | 1(1)            |
| C(12) | 15(1)           | 27(1)           | 26(1)           | 0(1)            | -1(1)           | 2(1)            |
| C(13) | 19(1)           | 24(1)           | 27(1)           | 6(1)            | -2(1)           | 5(1)            |
| C(14) | 17(1)           | 18(1)           | 19(1)           | 2(1)            | -2(1)           | 2(1)            |
| C(15) | 20(1)           | 22(1)           | 17(1)           | 1(1)            | -3(1)           | -2(1)           |
| C(16) | 19(1)           | 18(1)           | 15(1)           | -1(1)           | -1(1)           | 0(1)            |
| C(17) | 18(1)           | 18(1)           | 19(1)           | 2(1)            | -3(1)           | -3(1)           |

**Table S9.** Hydrogen coordinates ( $\times 10^4$ ) and isotropic displacement parameters ( $\text{\AA}^2 \times 10^3$ ) for **3w**.

|       | x     | y    | z    | U(eq) |
|-------|-------|------|------|-------|
| H(1)  | 10752 | 825  | 6370 | 51    |
| H(13) | 9693  | -142 | 5890 | 51    |
| H(14) | 9803  | -283 | 6816 | 51    |
| H(3)  | 6492  | 2480 | 6176 | 17    |
| H(2)  | 7528  | 3000 | 4978 | 22    |
| H(19) | 9040  | 4303 | 4177 | 25    |
| H(4)  | 5355  | 4851 | 6937 | 17    |
| H(12) | 2968  | 4502 | 7620 | 26    |
| H(11) | 2215  | 3034 | 7586 | 26    |
| H(10) | 1746  | 3290 | 6238 | 27    |
| H(5)  | 1101  | 4590 | 6678 | 27    |
| H(6)  | 3069  | 5921 | 6313 | 28    |
| H(7)  | 2430  | 5234 | 5543 | 28    |
| H(8)  | 4992  | 5079 | 5569 | 21    |
| H(9)  | 4276  | 3601 | 5534 | 21    |
| H(15) | 7855  | 3356 | 8312 | 24    |
| H(16) | 6486  | 4203 | 7951 | 24    |
| H(17) | 7952  | 5755 | 6703 | 21    |
| H(18) | 9436  | 7084 | 5909 | 22    |

**Table S10.** Torsion angles [°] for **3w**.

|                         |             |
|-------------------------|-------------|
| C(1)-O(1)-C(2)-O(3)     | 1.1(3)      |
| C(1)-O(1)-C(2)-C(3)     | -178.1(2)   |
| O(3)-C(2)-C(3)-C(15)    | -14.6(4)    |
| O(1)-C(2)-C(3)-C(15)    | 164.6(2)    |
| O(3)-C(2)-C(3)-C(4)     | 163.3(2)    |
| O(1)-C(2)-C(3)-C(4)     | -17.4(3)    |
| C(15)-C(3)-C(4)-C(5)    | 106.4(2)    |
| C(2)-C(3)-C(4)-C(5)     | -71.3(3)    |
| C(15)-C(3)-C(4)-C(9)    | -18.5(3)    |
| C(2)-C(3)-C(4)-C(9)     | 163.69(19)  |
| C(3)-C(4)-C(5)-C(16)    | -55.6(3)    |
| C(9)-C(4)-C(5)-C(16)    | 69.8(2)     |
| C(3)-C(4)-C(5)-C(6)     | 122.9(2)    |
| C(9)-C(4)-C(5)-C(6)     | -111.8(2)   |
| C(16)-C(5)-C(6)-C(7)    | 0.9(3)      |
| C(4)-C(5)-C(6)-C(7)     | -177.6(2)   |
| C(5)-C(6)-C(7)-C(8)     | -0.5(3)     |
| C(6)-C(7)-C(8)-C(17)    | -0.2(4)     |
| C(6)-C(7)-C(8)-Br(1)    | 178.02(17)  |
| C(3)-C(4)-C(9)-C(10)    | -64.2(2)    |
| C(5)-C(4)-C(9)-C(10)    | 172.66(17)  |
| C(3)-C(4)-C(9)-C(14)    | 176.27(19)  |
| C(5)-C(4)-C(9)-C(14)    | 53.2(2)     |
| C(4)-C(9)-C(10)-O(2)    | -11.5(3)    |
| C(14)-C(9)-C(10)-O(2)   | 111.7(2)    |
| C(4)-C(9)-C(10)-C(11)   | 175.27(18)  |
| C(14)-C(9)-C(10)-C(11)  | -61.6(2)    |
| O(2)-C(10)-C(11)-C(12)  | -111.5(2)   |
| C(9)-C(10)-C(11)-C(12)  | 61.8(2)     |
| C(10)-C(11)-C(12)-C(13) | -55.3(3)    |
| C(11)-C(12)-C(13)-C(14) | 54.0(3)     |
| C(12)-C(13)-C(14)-C(9)  | -55.3(3)    |
| C(10)-C(9)-C(14)-C(13)  | 56.0(2)     |
| C(4)-C(9)-C(14)-C(13)   | 178.89(19)  |
| C(6)-C(5)-C(16)-C(17)   | -0.4(3)     |
| C(4)-C(5)-C(16)-C(17)   | 178.06(19)  |
| C(7)-C(8)-C(17)-C(16)   | 0.7(3)      |
| Br(1)-C(8)-C(17)-C(16)  | -177.59(16) |
| C(5)-C(16)-C(17)-C(8)   | -0.4(3)     |

Symmetry transformations used to generate equivalent atoms

**Table S11.** Hydrogen bonds for **3w**.

| D-H...A                               | d(D-H) | d(H...A) | d(D...A) | <(DHA) |
|---------------------------------------|--------|----------|----------|--------|
| C(9) --H(4) ..O(2) [1-x,1/2+y,3/2-z]  | 1.00   | 2.53     | 3.527(3) | 174    |
| C(11) --H(11) ..O(3) [-1+x,y,z]       | 0.99   | 2.60     | 3.421(3) | 141    |
| C(7) --H(19) ..O(2) [1/2+x,1/2-y,1-z] | 0.95   | 2.57     | 3.512(3) | 171    |

C(4) - C(3) C(5) C(9) H(3) sp3 S  
C(9) - C(4) C(10) C(14) H(4) sp3 R

## N. NMR Spectra

### N.1. NMR spectra of allyl fluorides

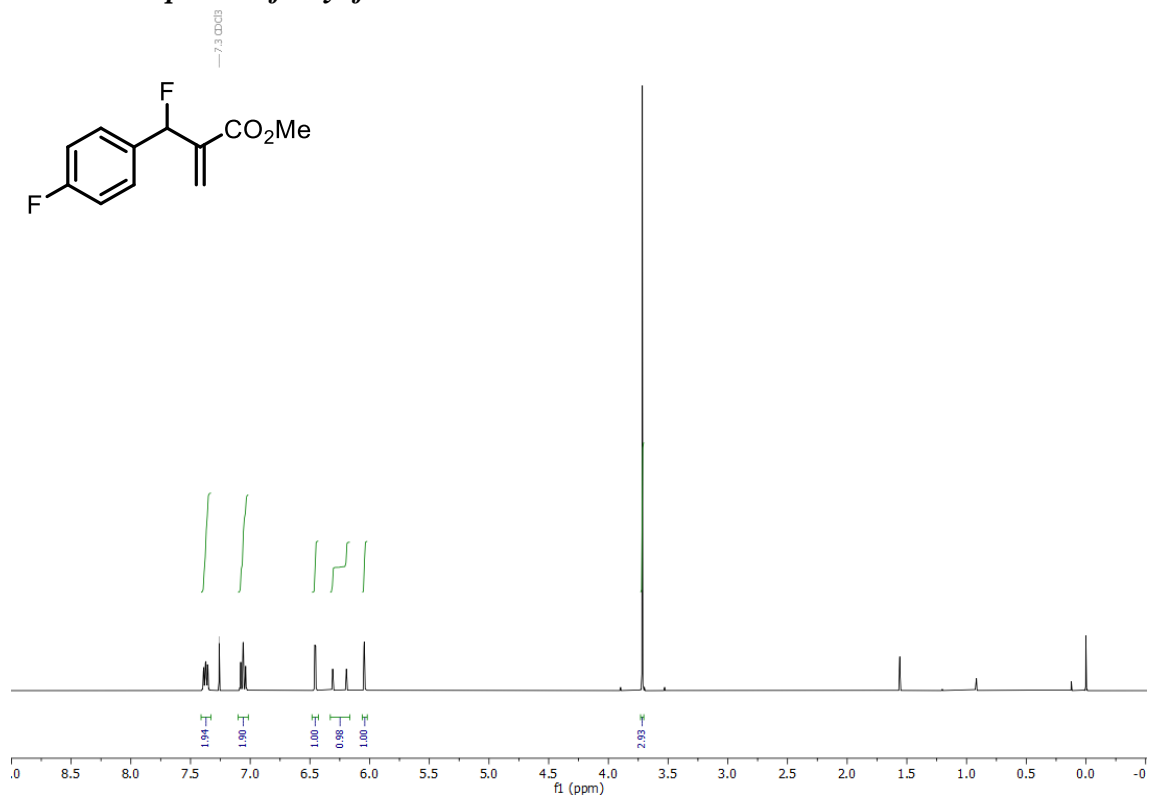

<sup>1</sup>H NMR spectra of **2c**.

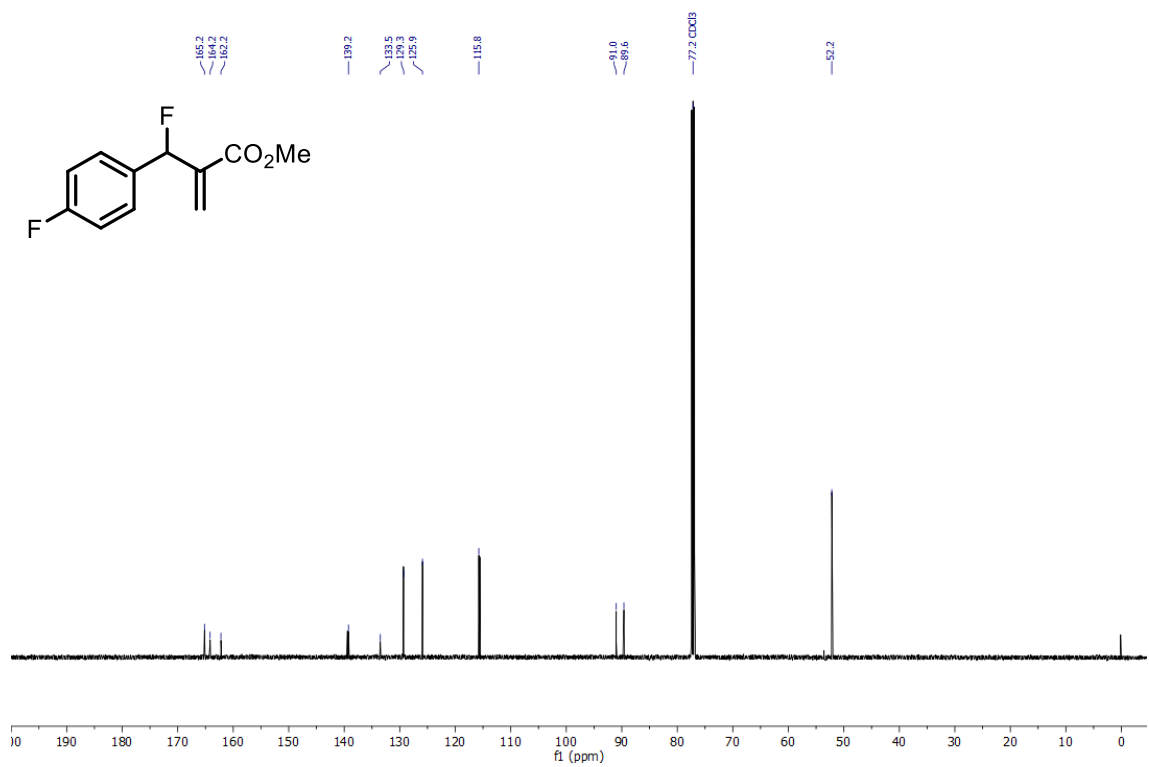

<sup>13</sup>C NMR spectra of **2c**.

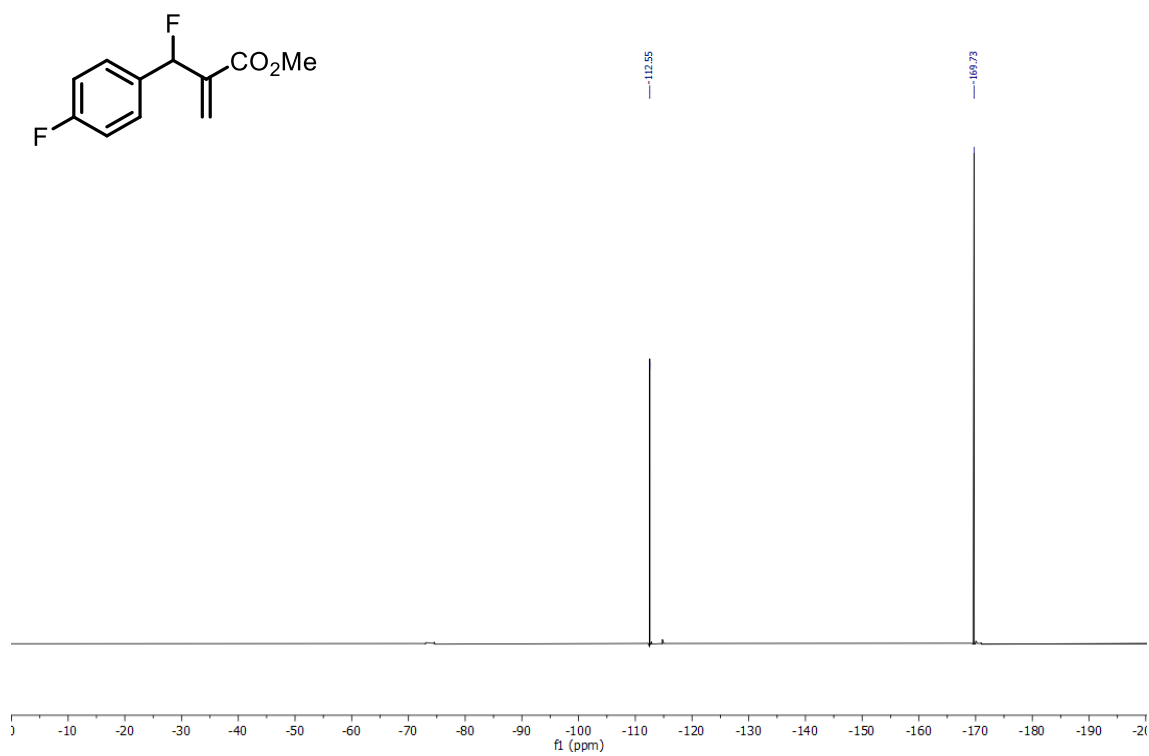

$^{19}\text{F}$  NMR spectra of **2c**.

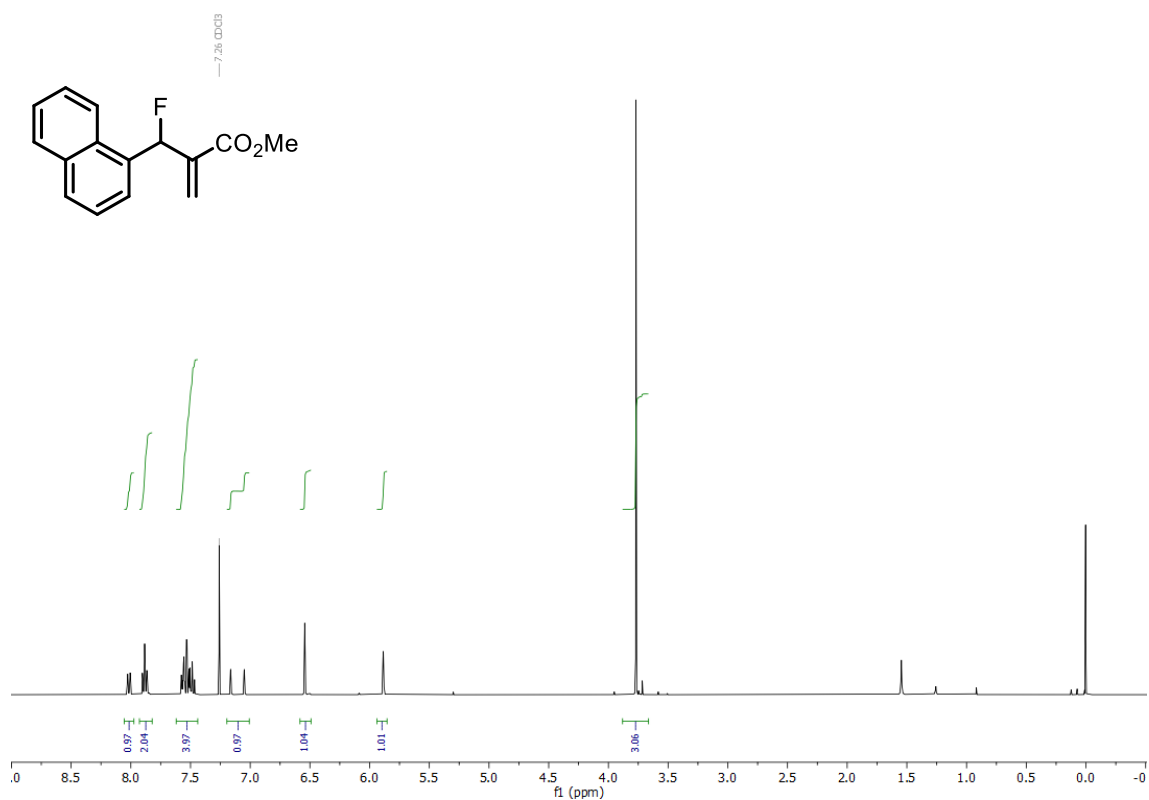

<sup>1</sup>H NMR spectra of **2n**.

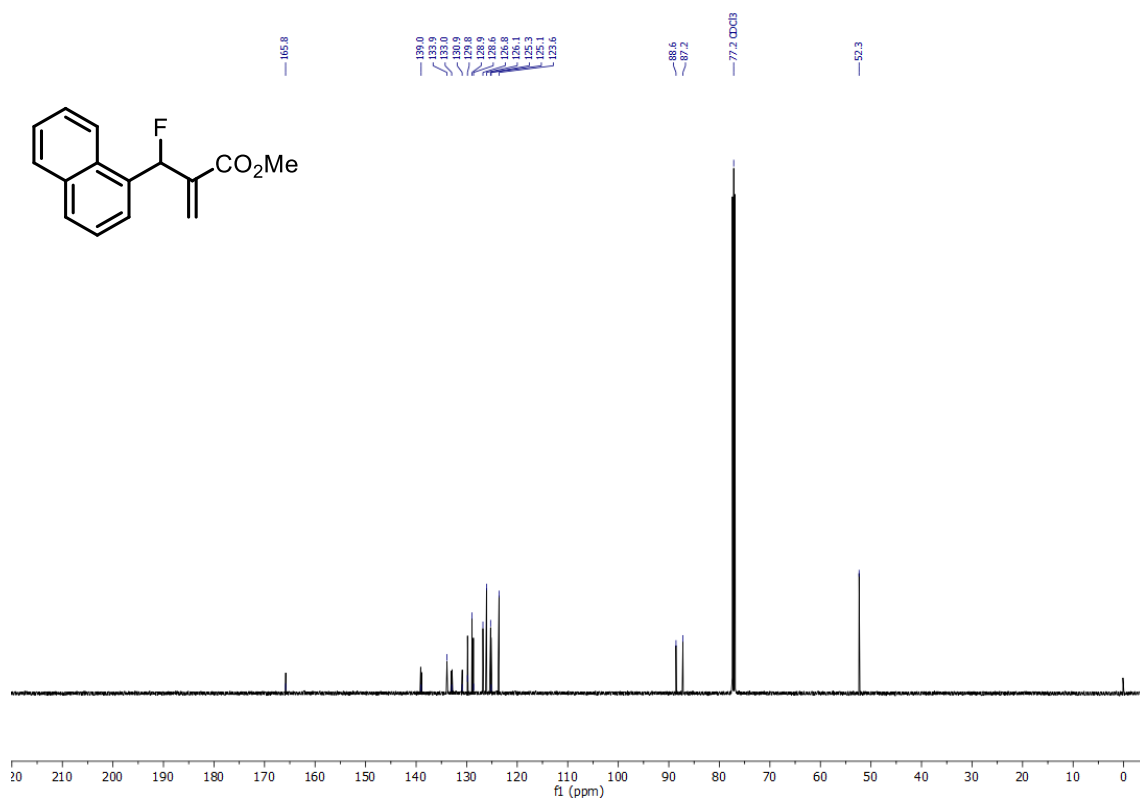

<sup>13</sup>C NMR spectra of **2n**.

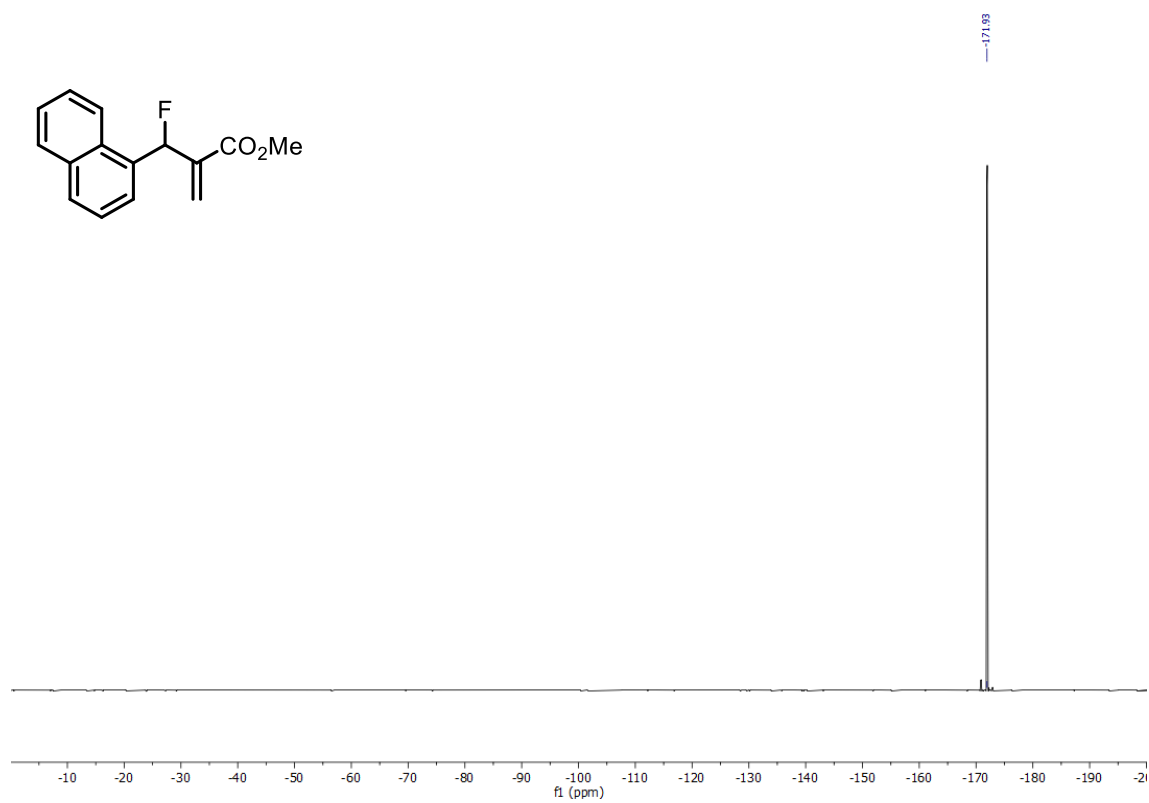

$^{19}\text{F}$  NMR spectra of **2n**.

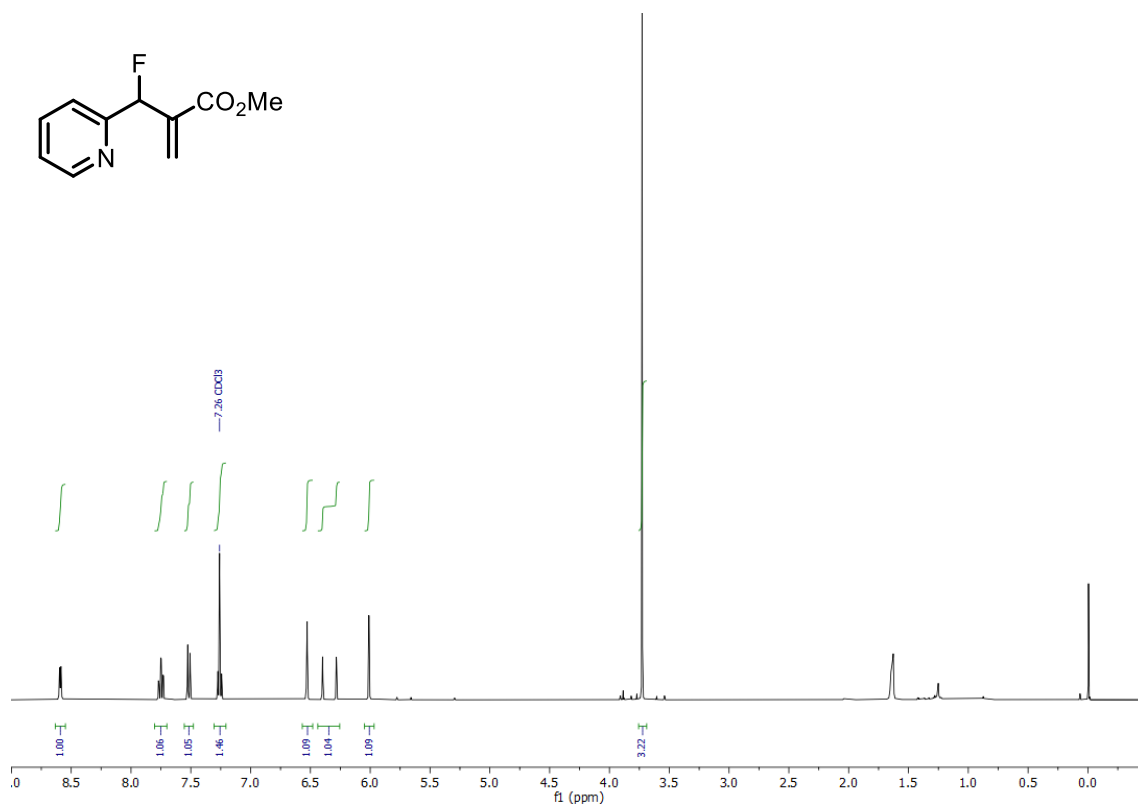

<sup>1</sup>H NMR spectra of **2o**.

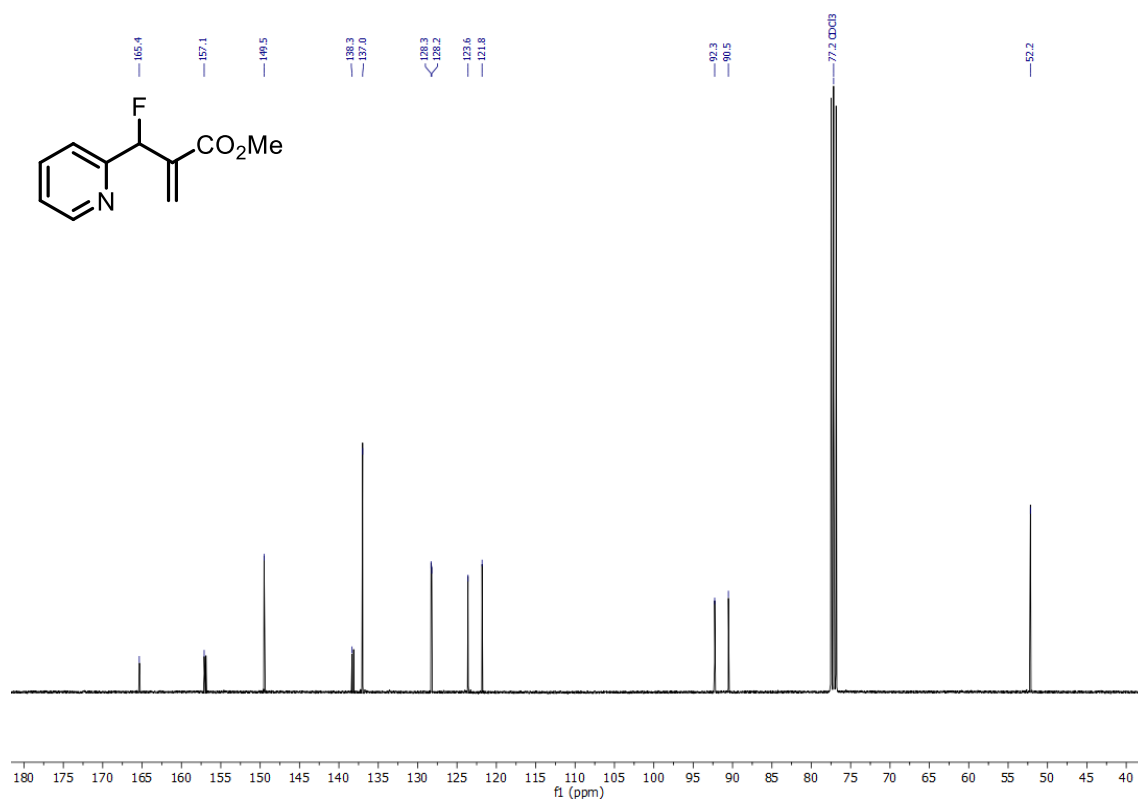

<sup>13</sup>C NMR spectra of **2o**.

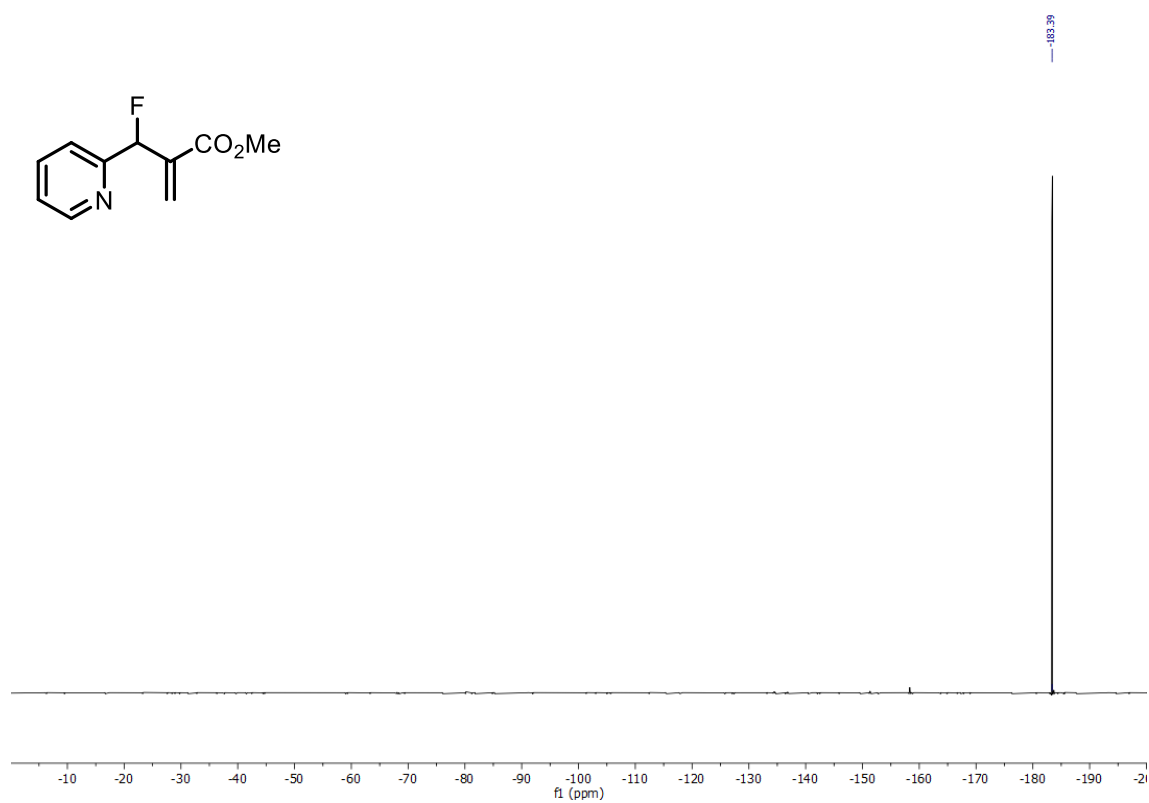

$^{19}\text{F}$  NMR spectra of **2o**.

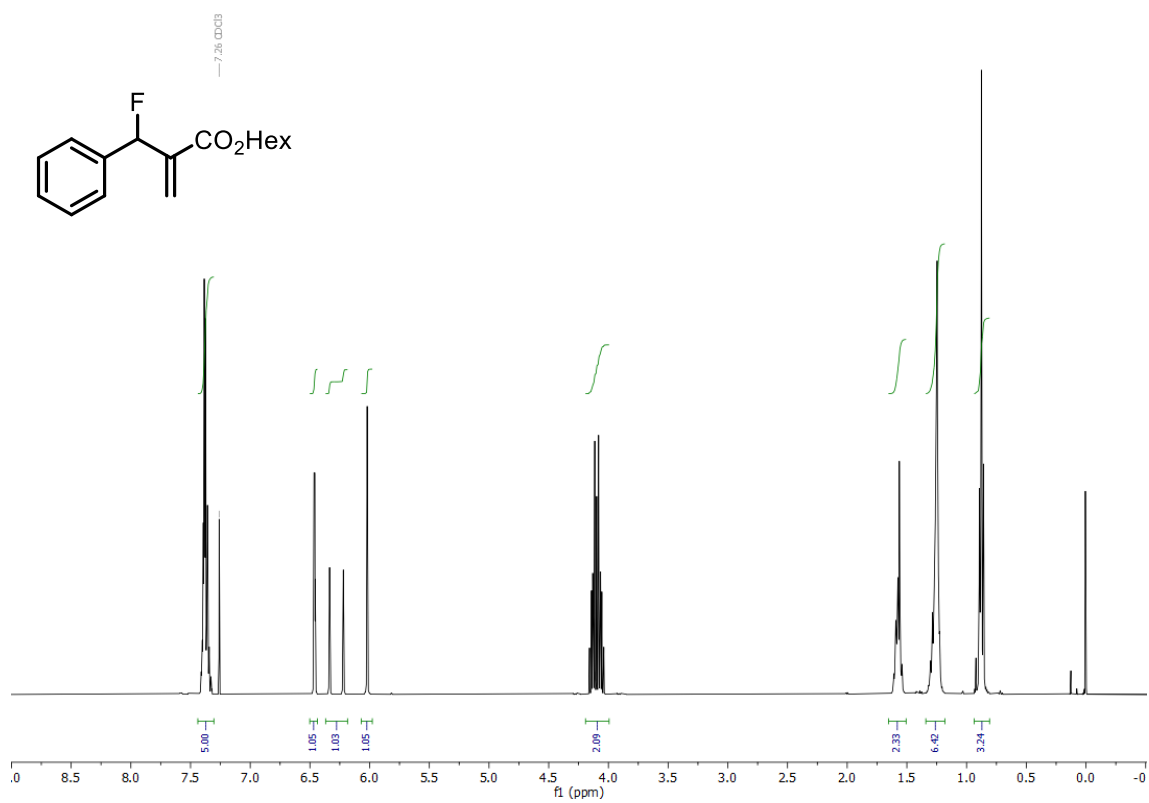

<sup>1</sup>H NMR spectra of **2q**.

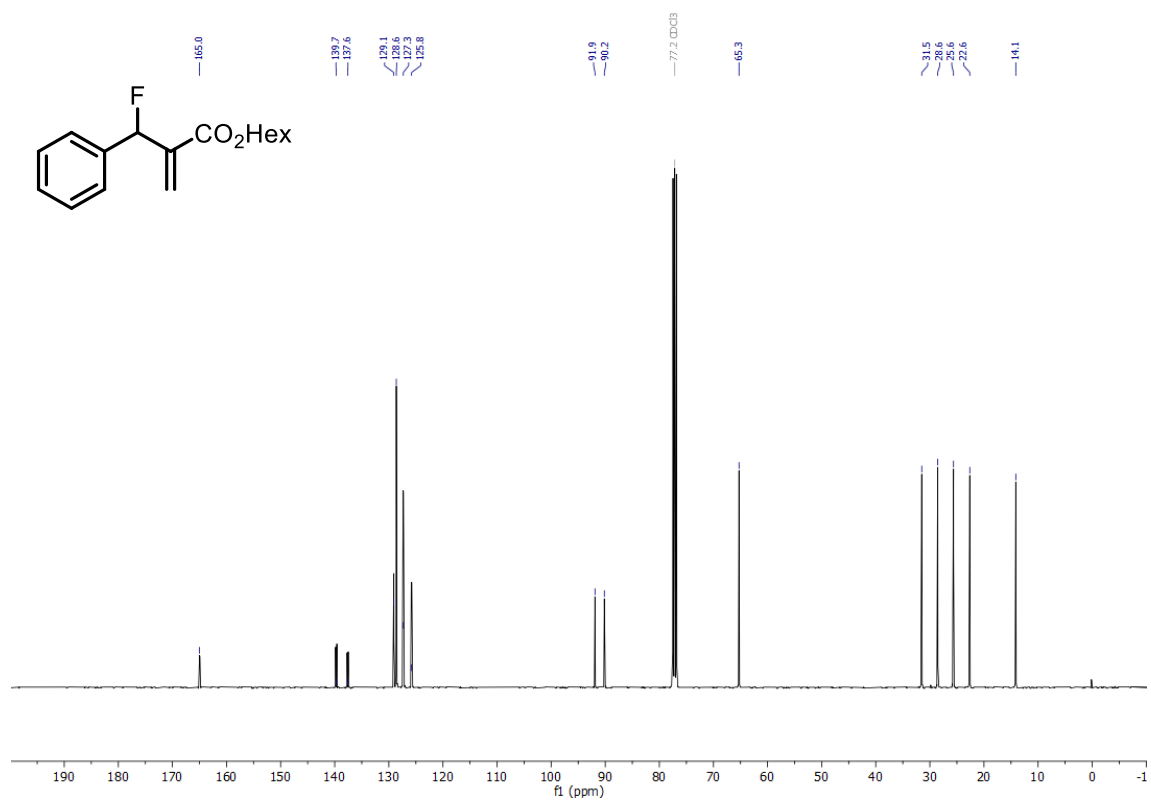

<sup>13</sup>C NMR spectra of **2q**.

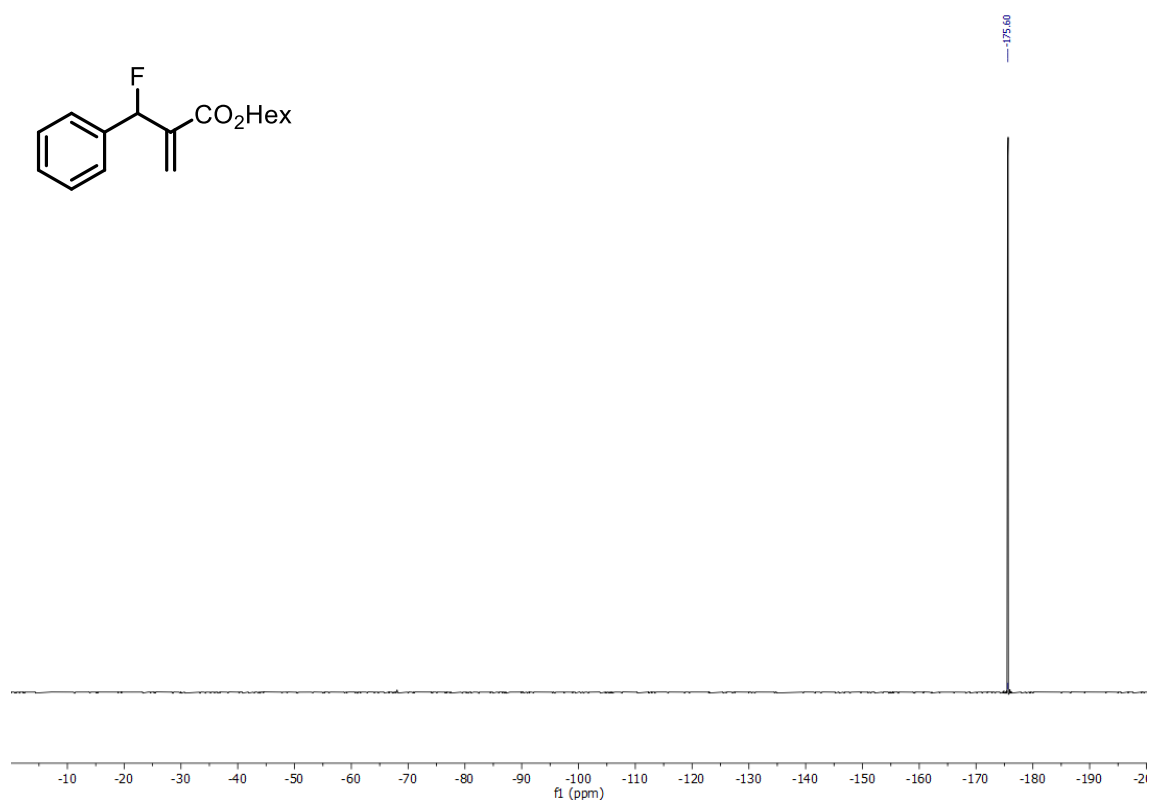

$^{19}\text{F}$  NMR spectra of **2q**.

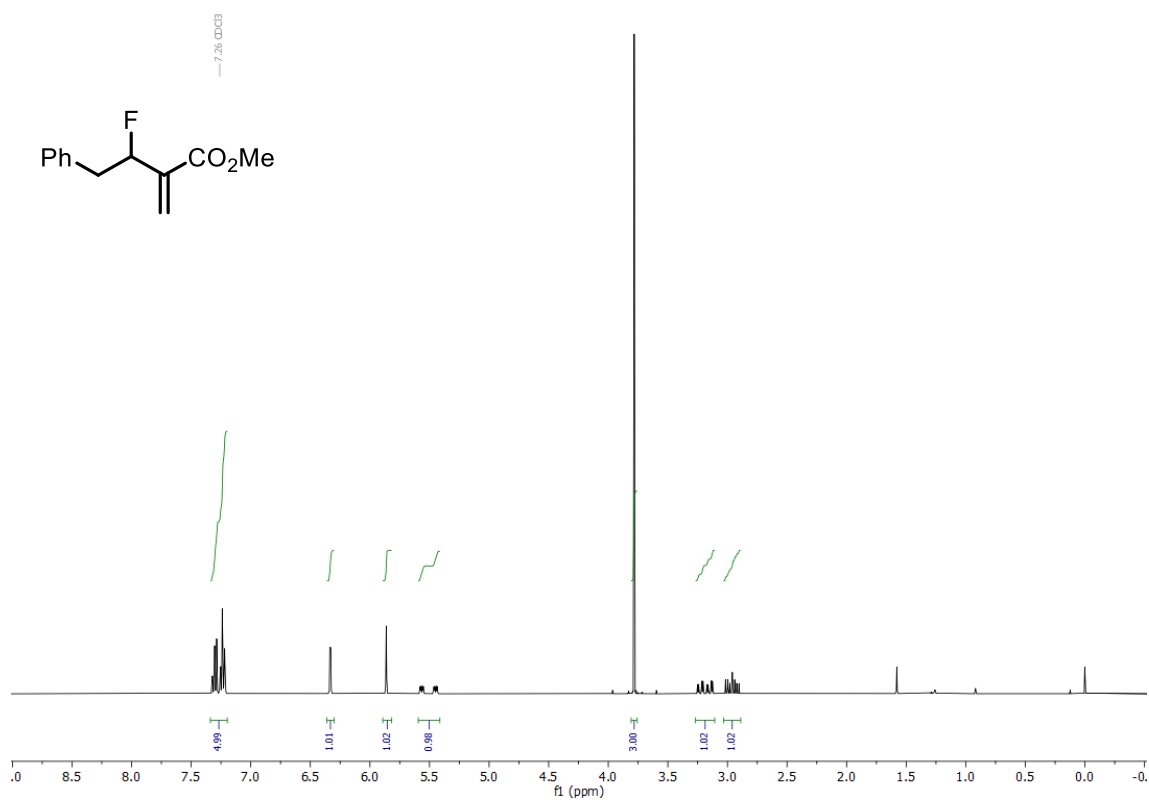

<sup>1</sup>H NMR spectra of **2t**.

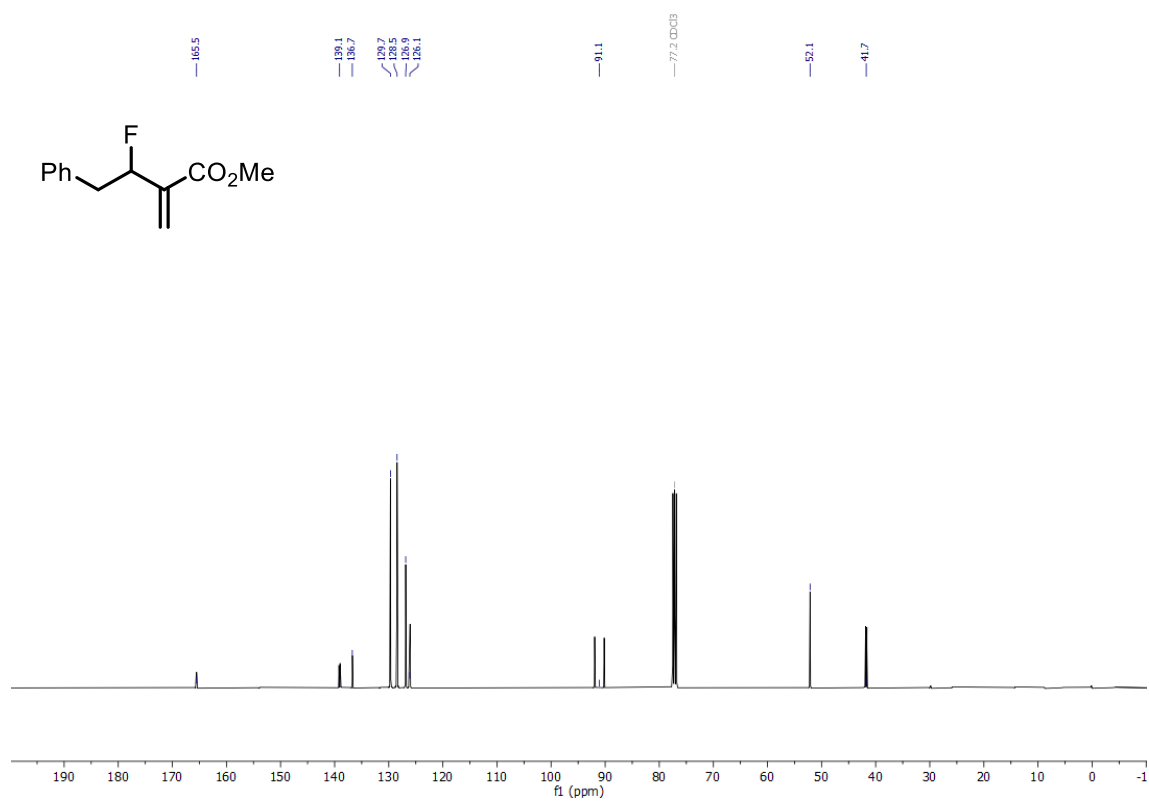

<sup>13</sup>C NMR spectra of **2t**.

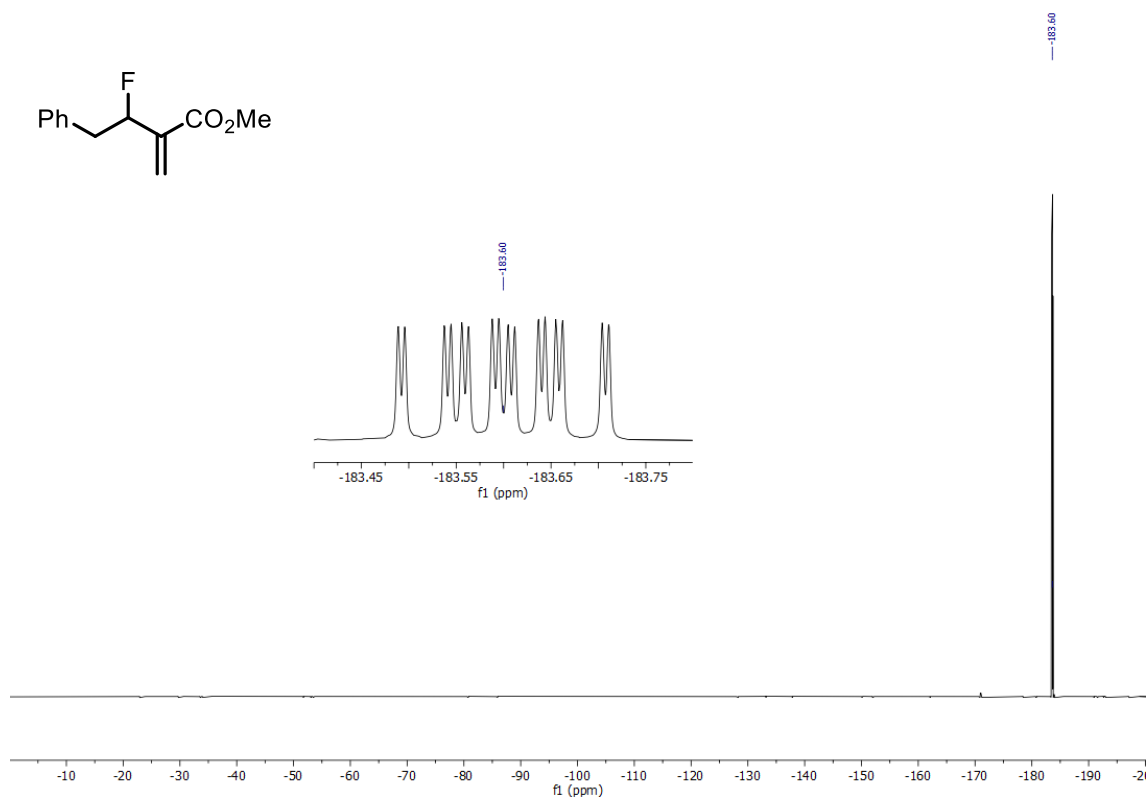

$^{19}\text{F}$  NMR spectra of **2t**.

## N.2. NMR spectra of silyl enol ethers

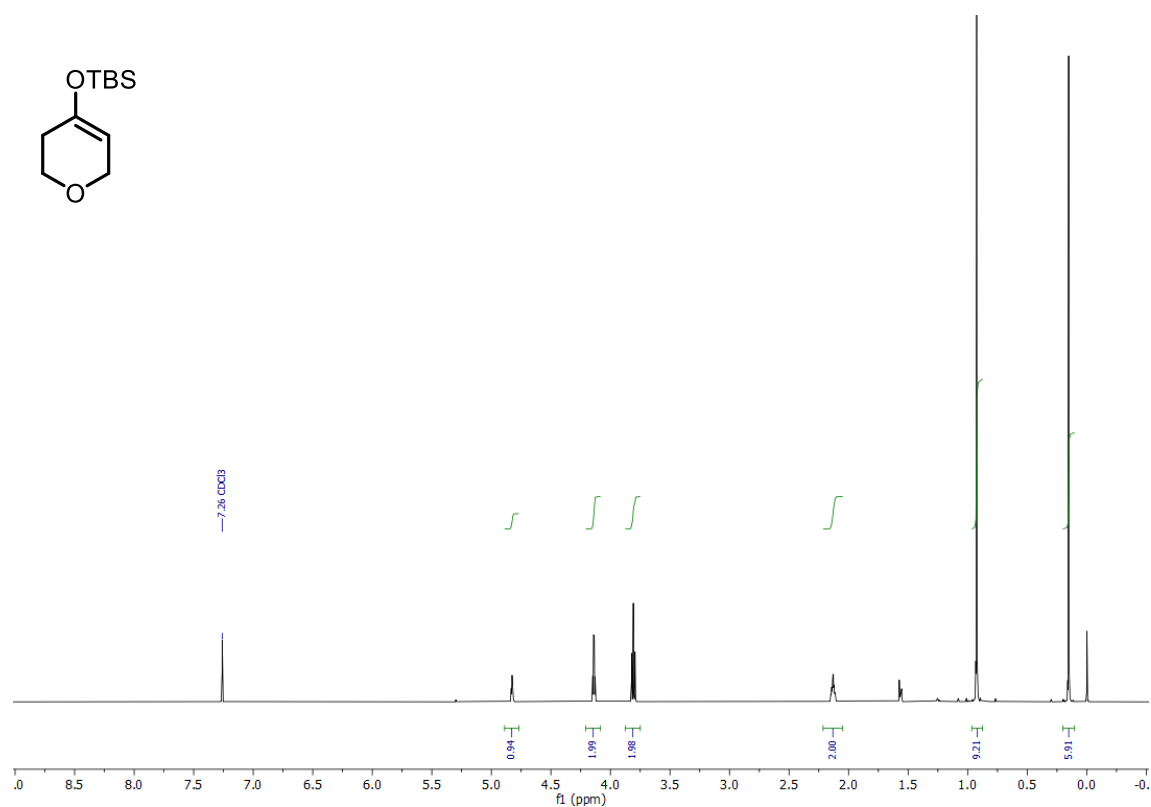

$^1\text{H}$  NMR spectra of **1h**.

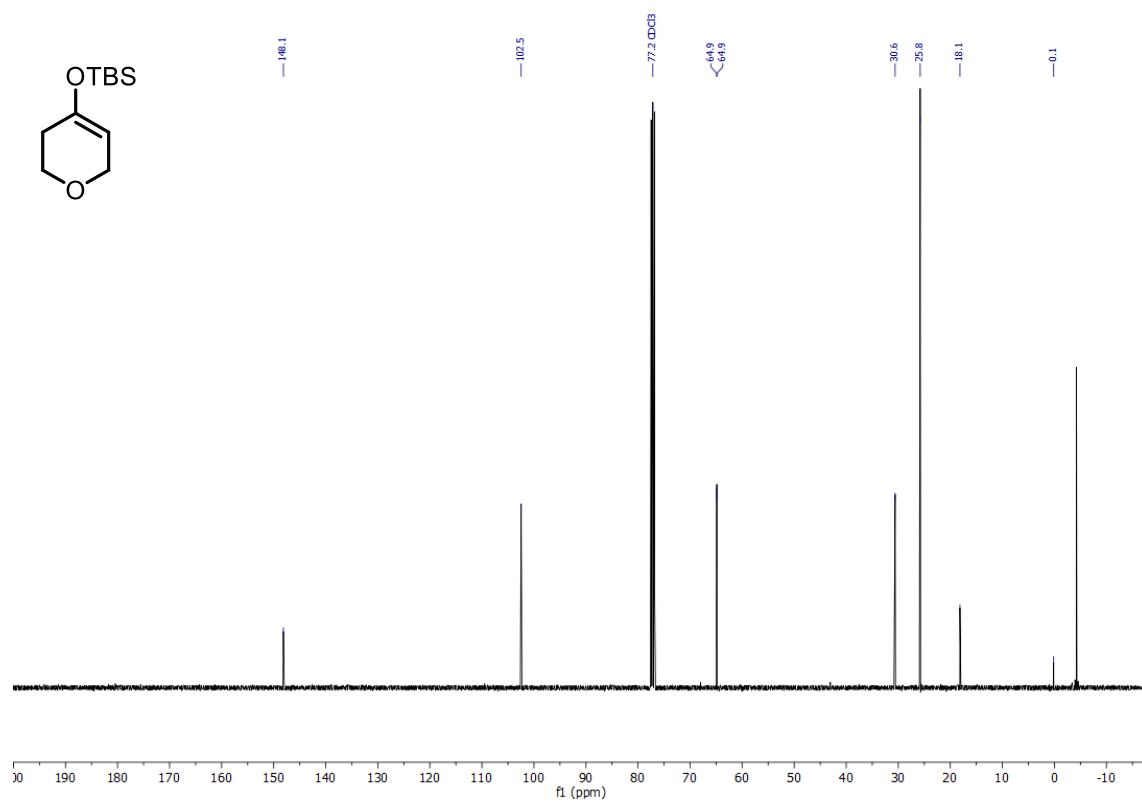

$^{13}\text{C}$  NMR spectra of **1h**.

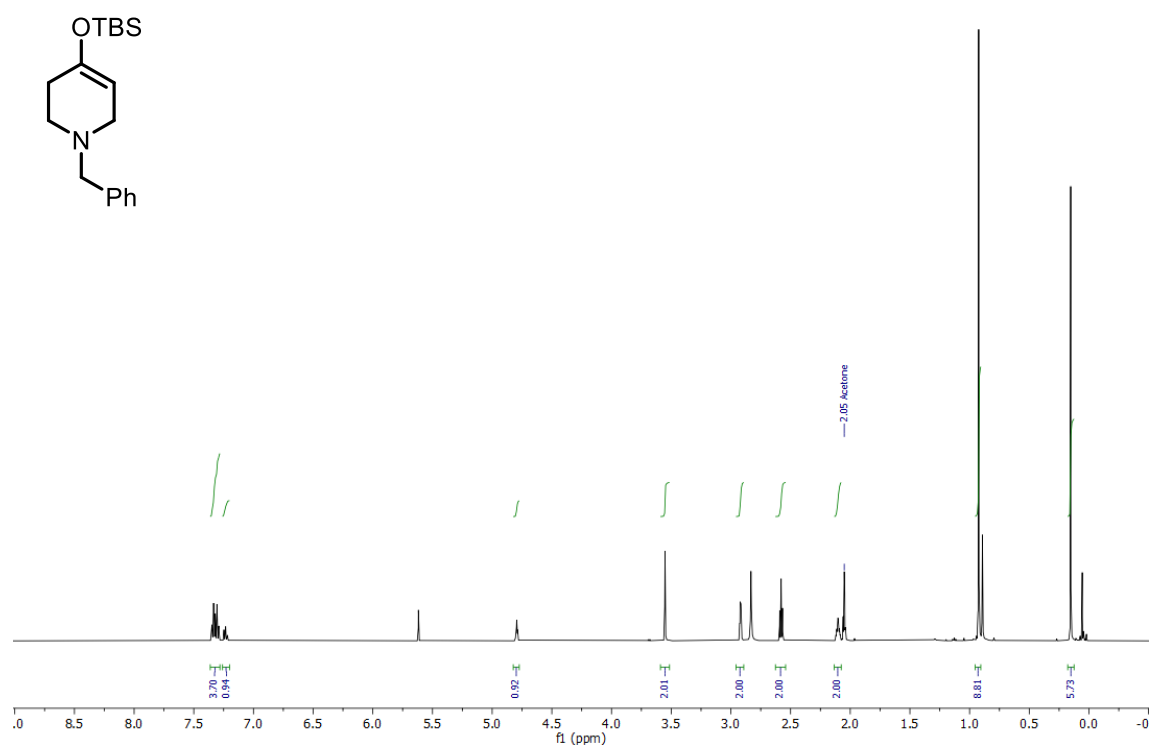

<sup>1</sup>H NMR spectra of **1r**.

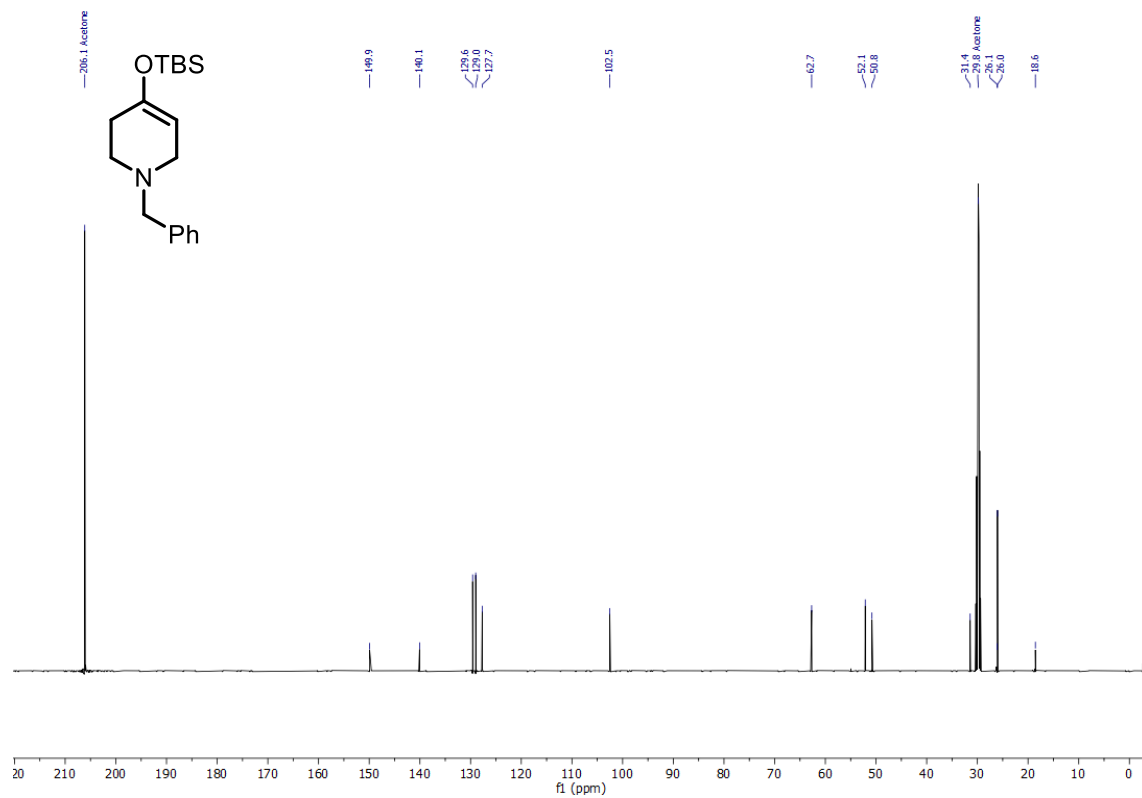

<sup>13</sup>C NMR spectra of **1r**.

### N.3. NMR spectra of enol carbonate

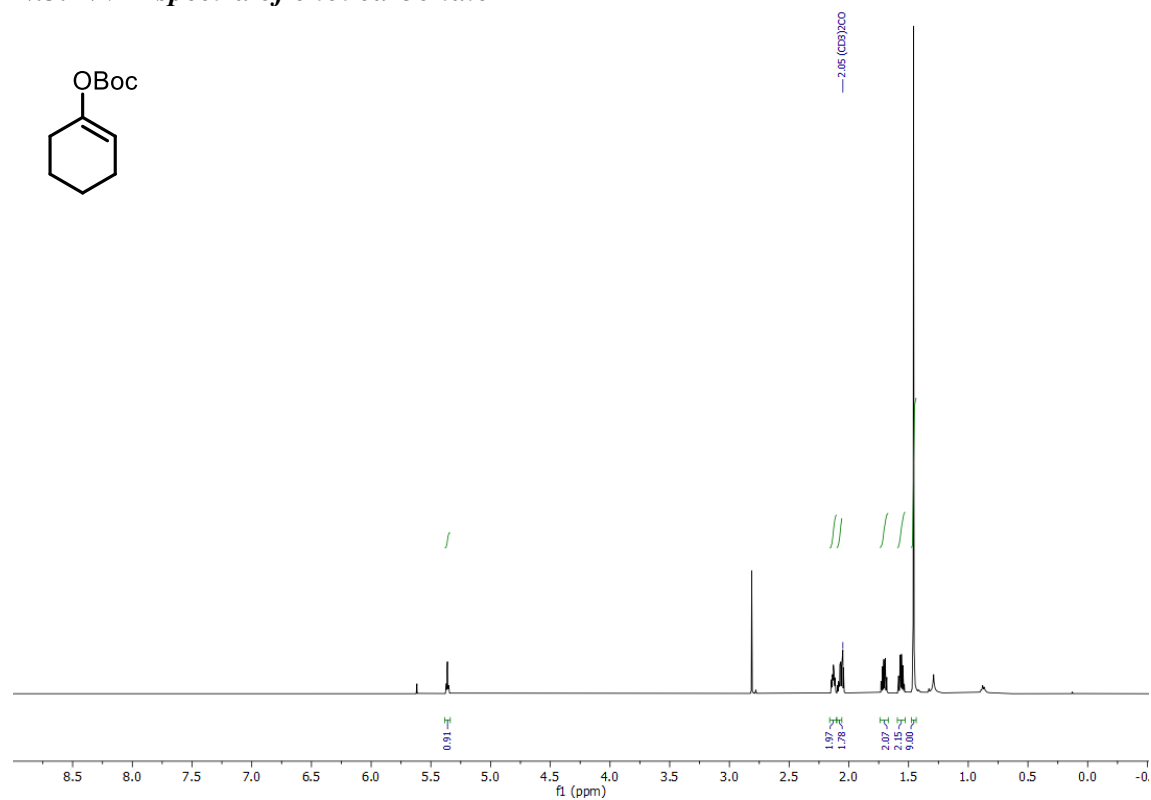

$^1\text{H}$  NMR spectra of **S7a**.

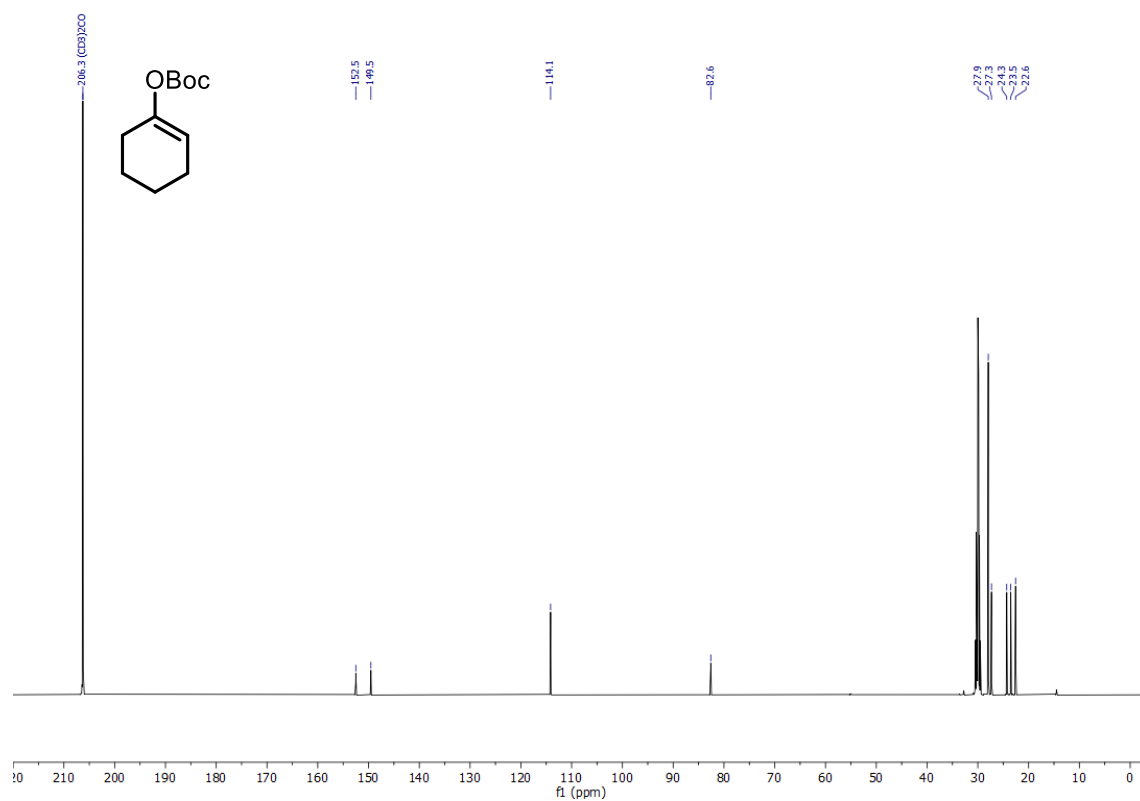

$^{13}\text{C}$  NMR spectra of **S7a**.

#### N.4. NMR spectra of products 3a-ae and 4a

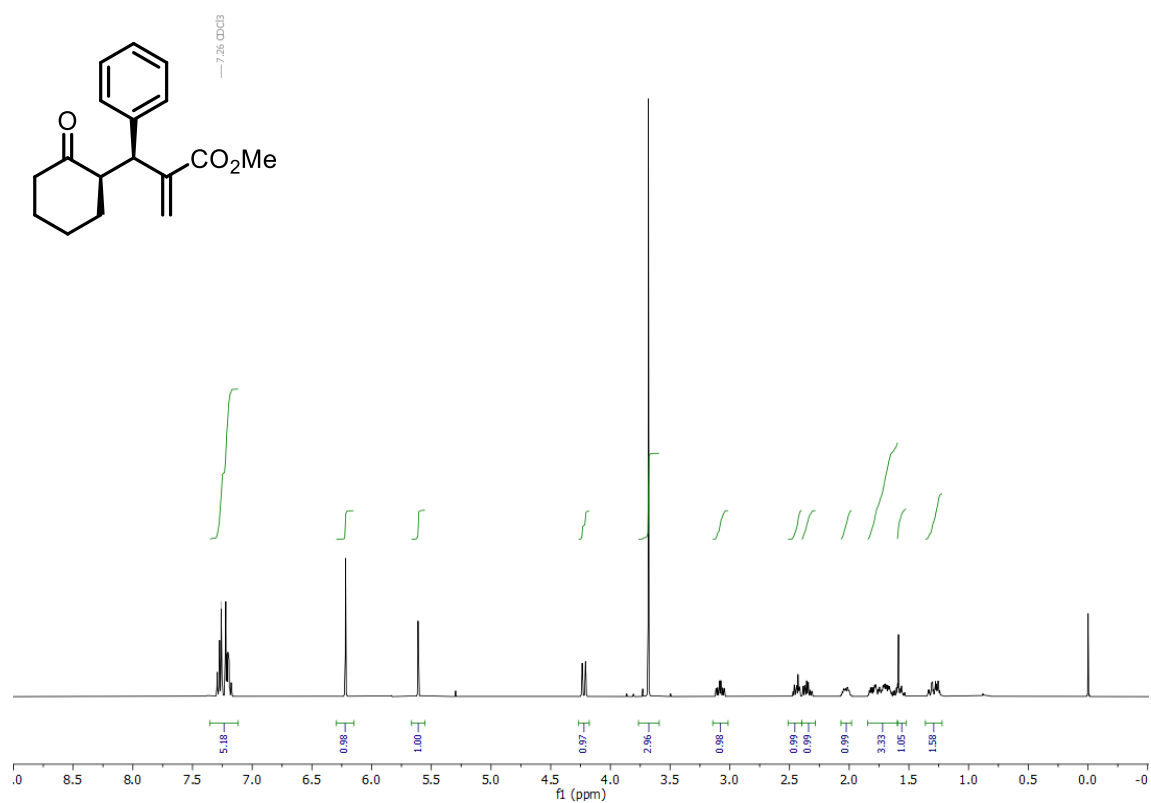

<sup>1</sup>H NMR spectra of **3a**.

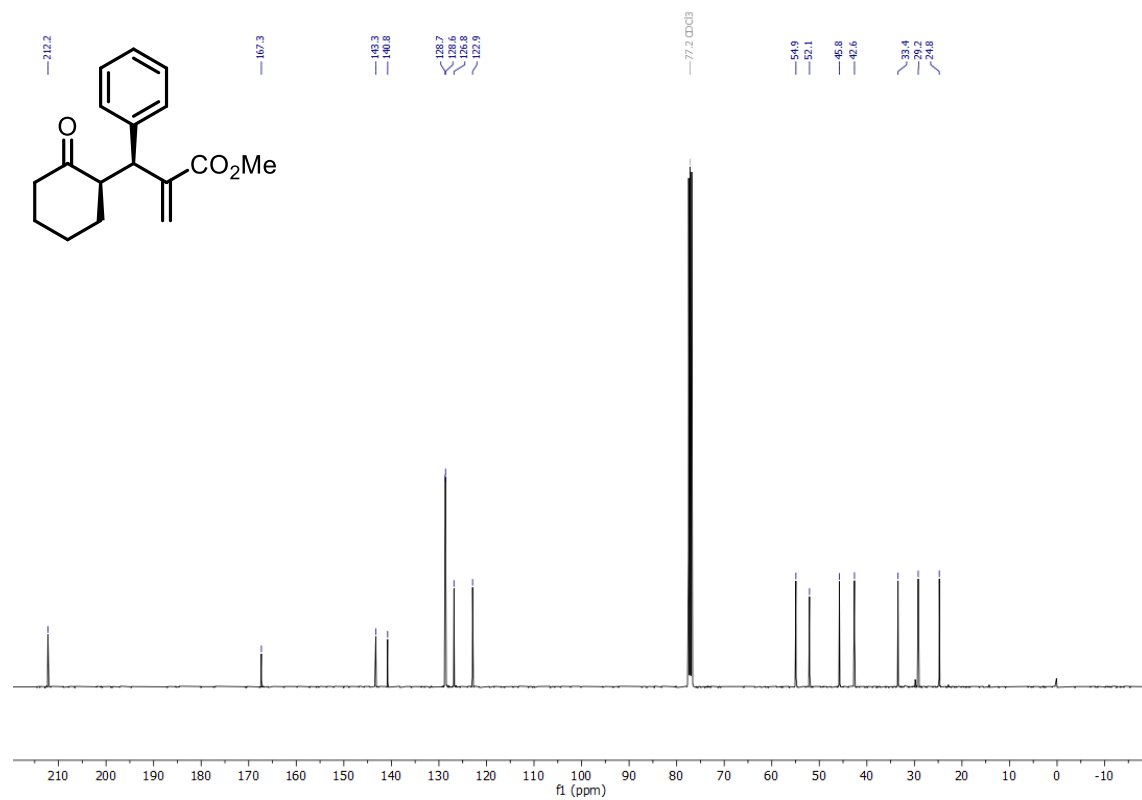

<sup>13</sup>C NMR spectra of **3a**.

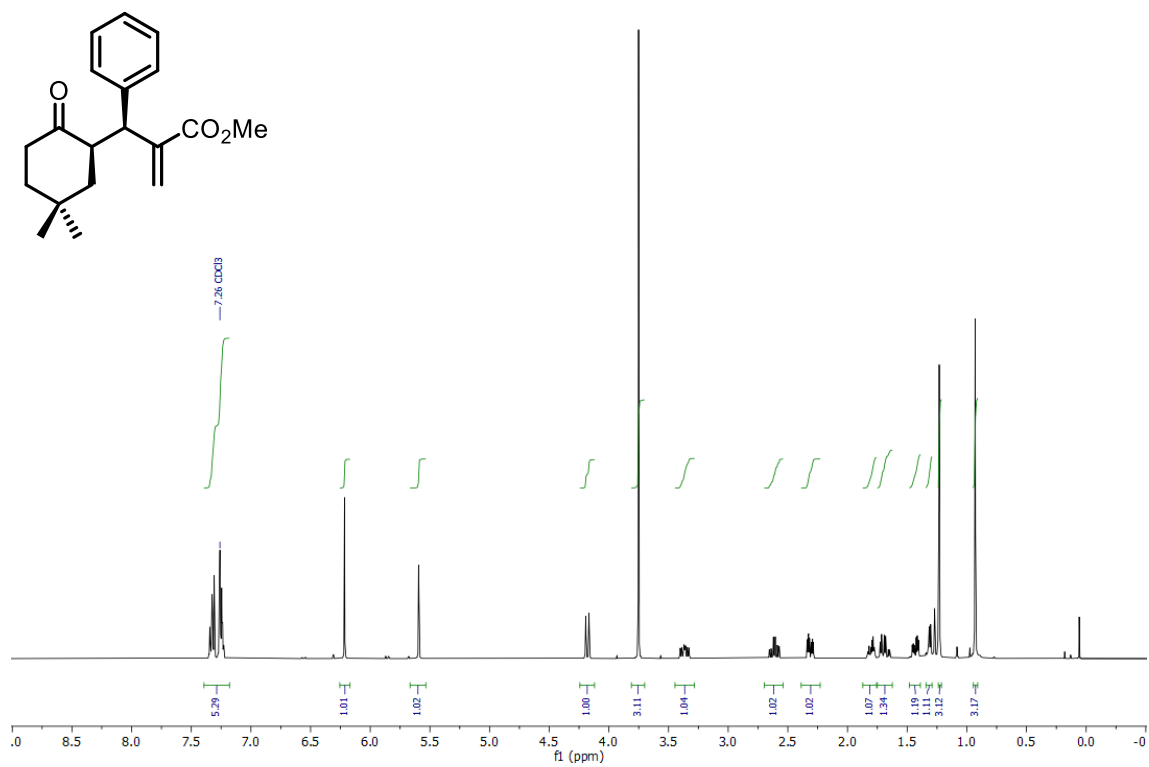

<sup>1</sup>H NMR spectra of **3b**.

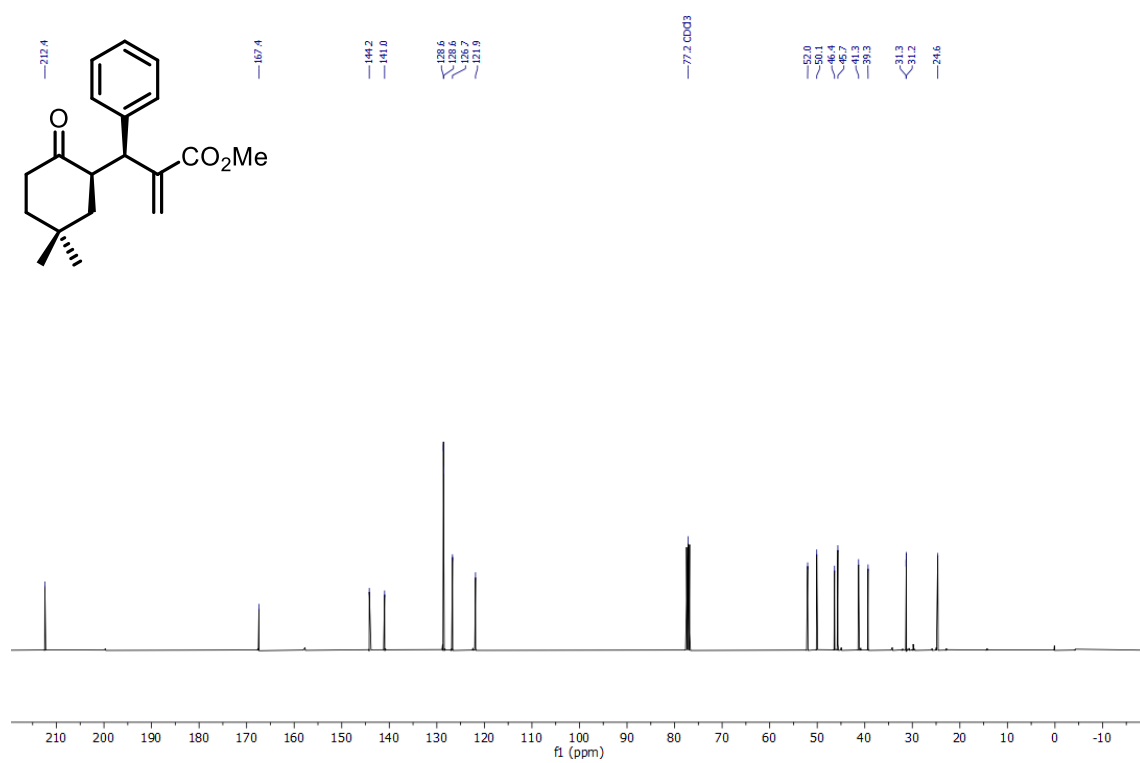

<sup>13</sup>C NMR spectra of **3b**.

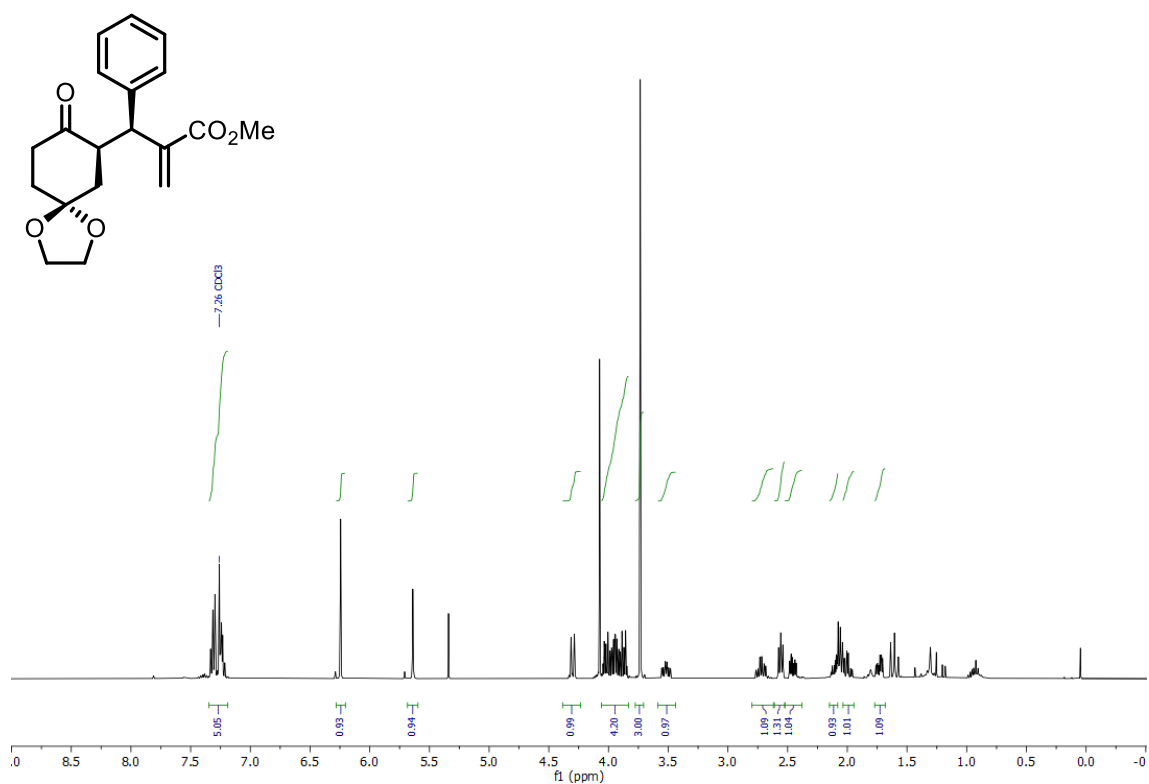

<sup>1</sup>H NMR spectra of **3c**.

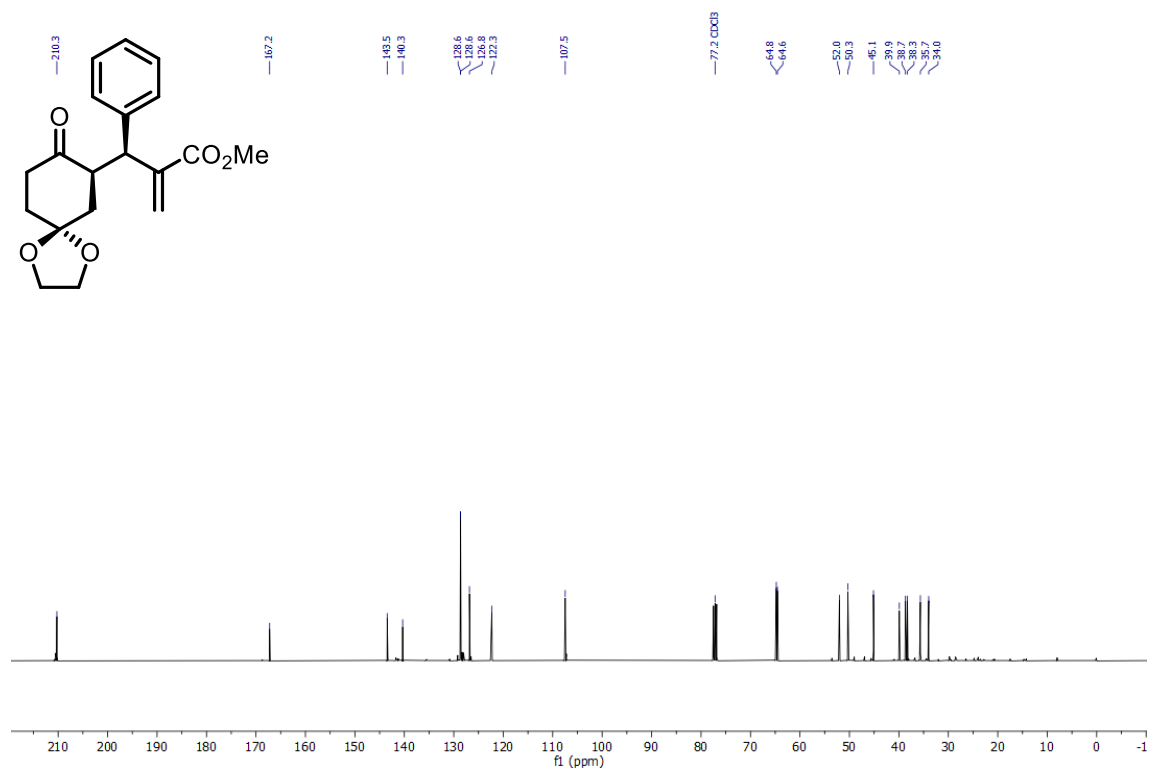

<sup>13</sup>C NMR spectra of **3c**.

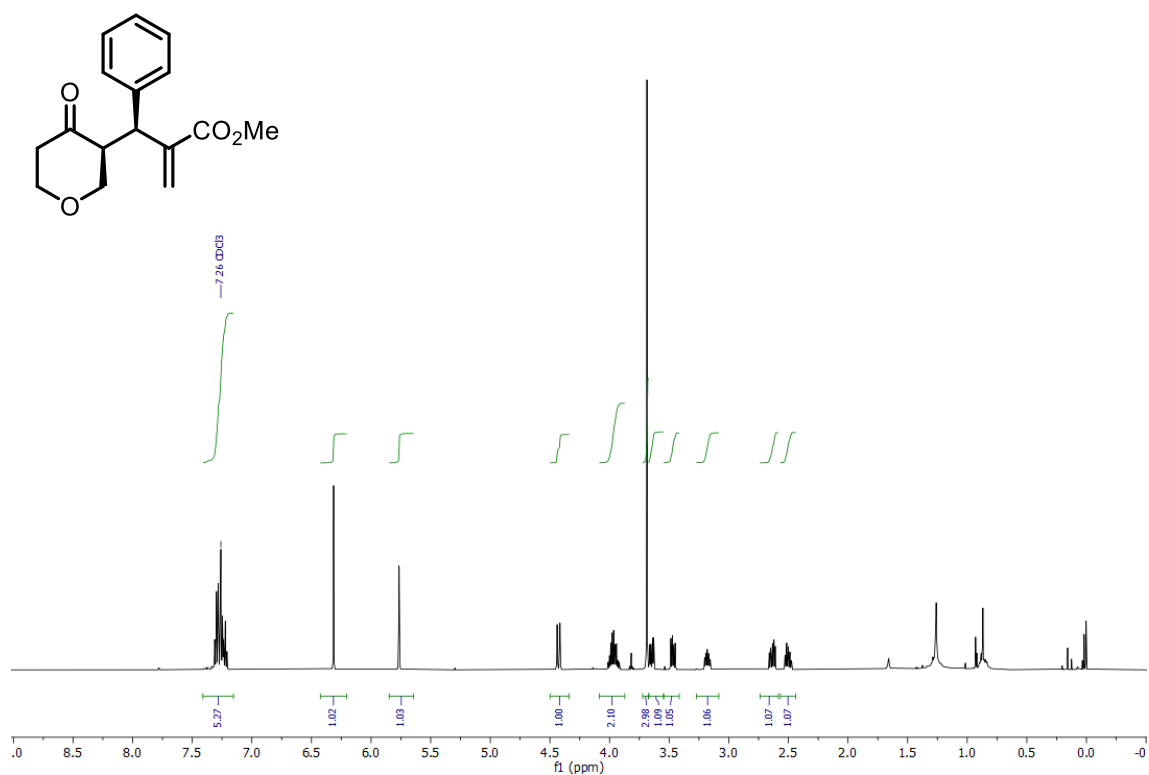

<sup>1</sup>H NMR spectra of **3d**.

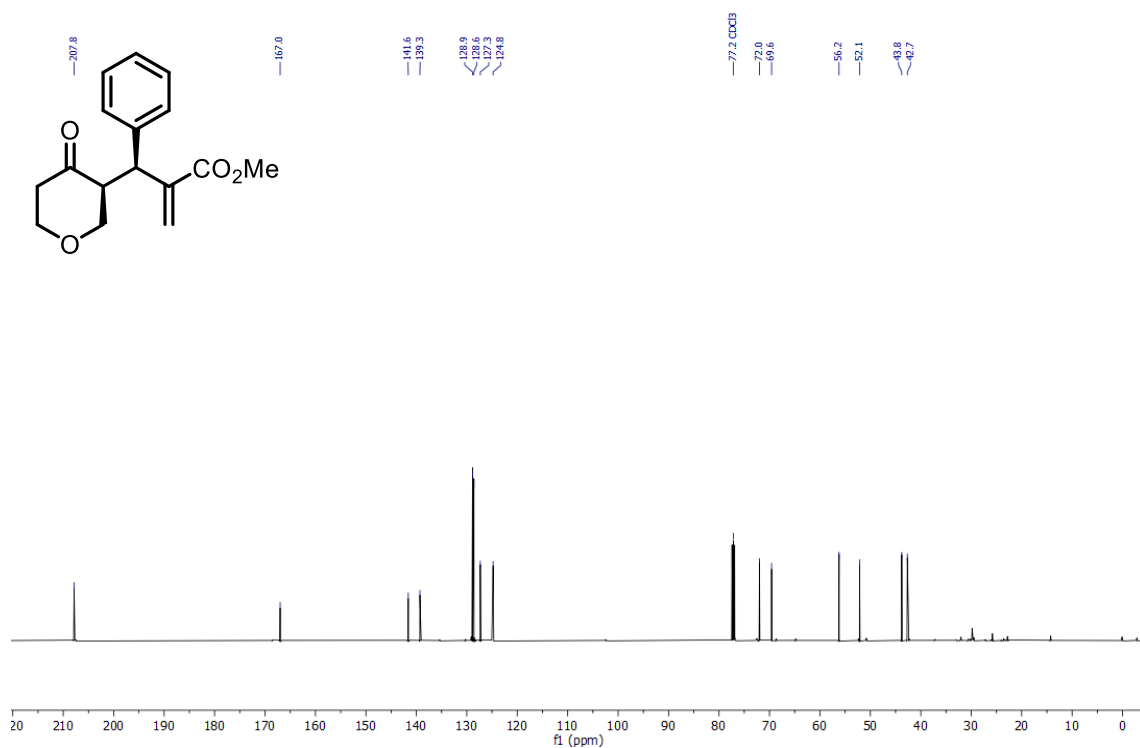

<sup>13</sup>C NMR spectra of **3d**.

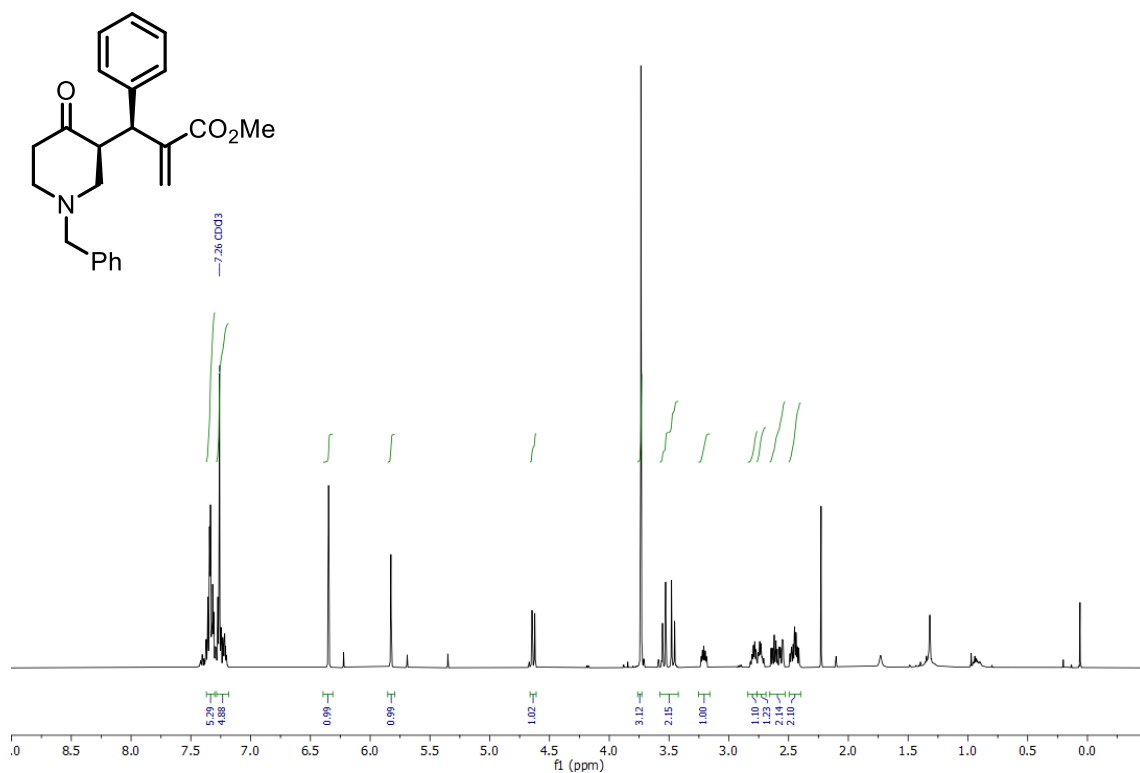

<sup>1</sup>H NMR spectra of **3e**.

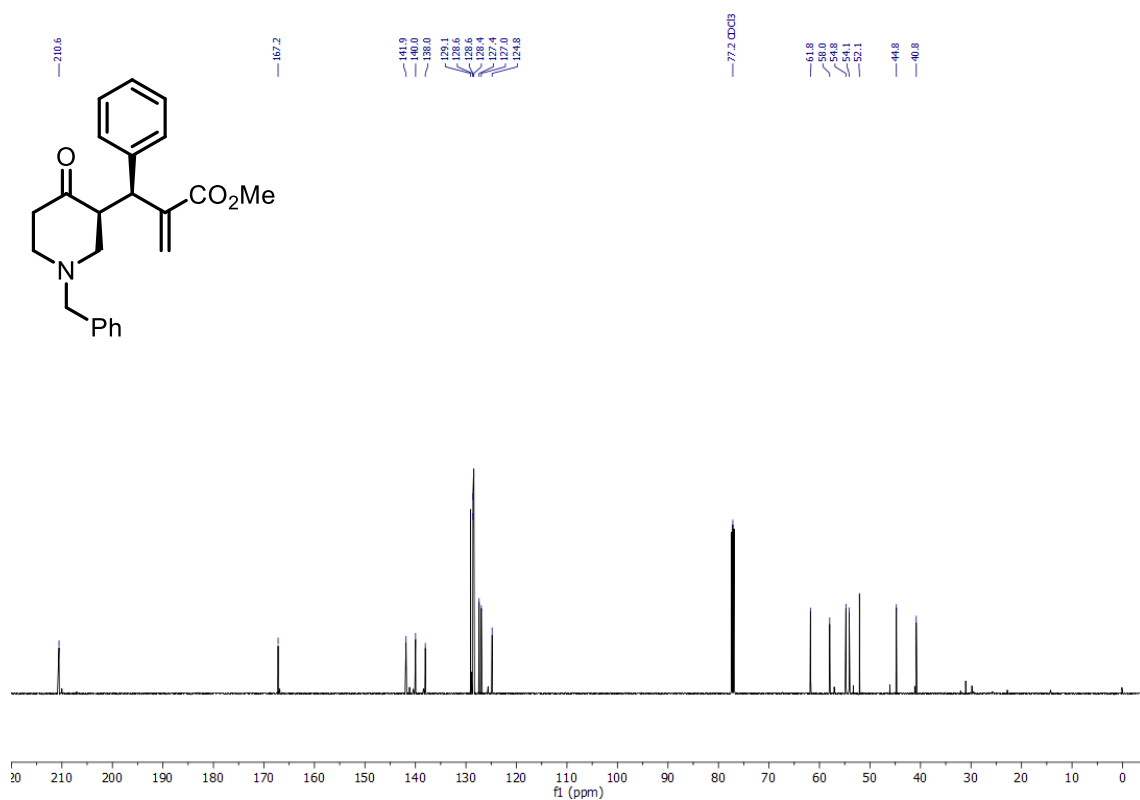

<sup>13</sup>C NMR spectra of **3e**.

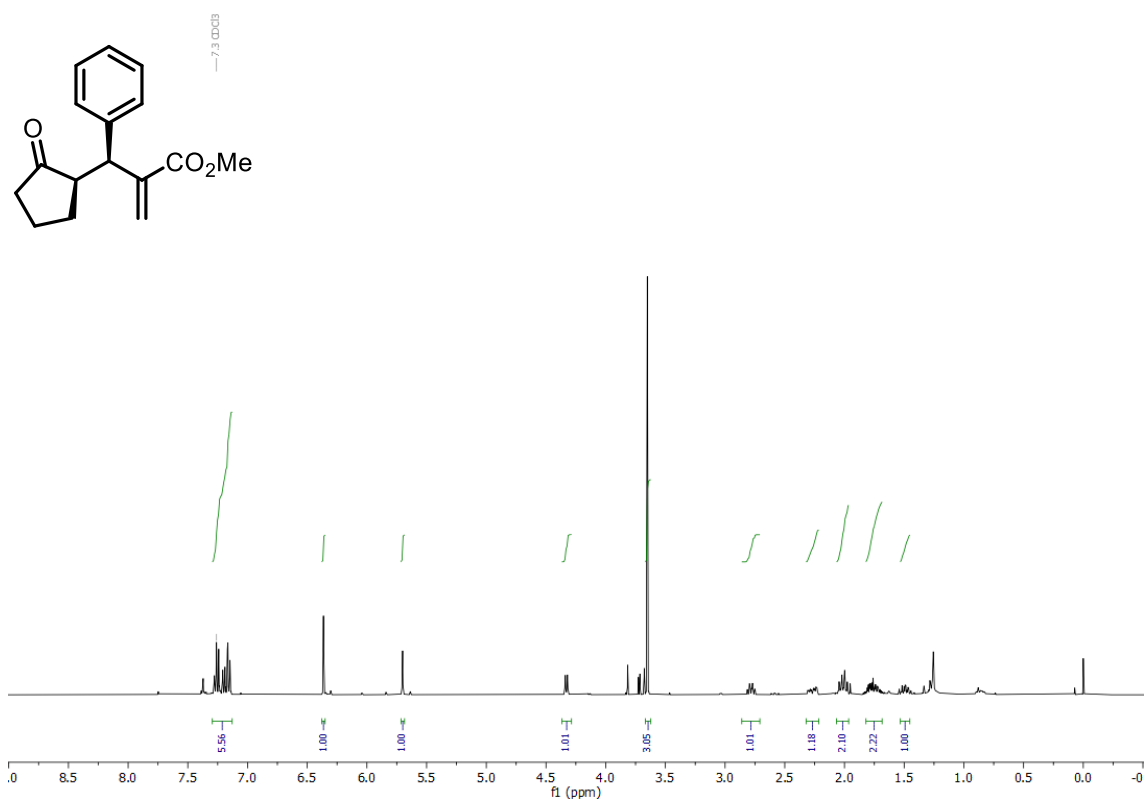

<sup>1</sup>H NMR spectra of **3f**.

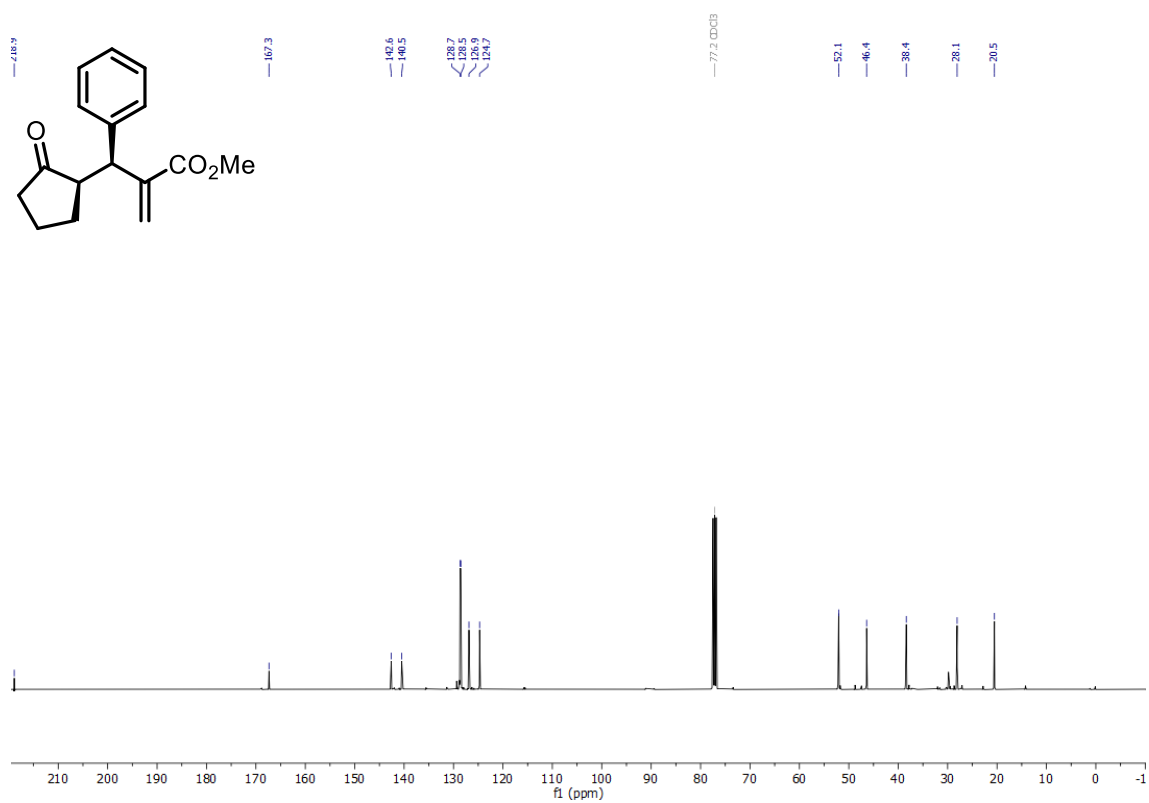

<sup>13</sup>C NMR spectra of **3f**.

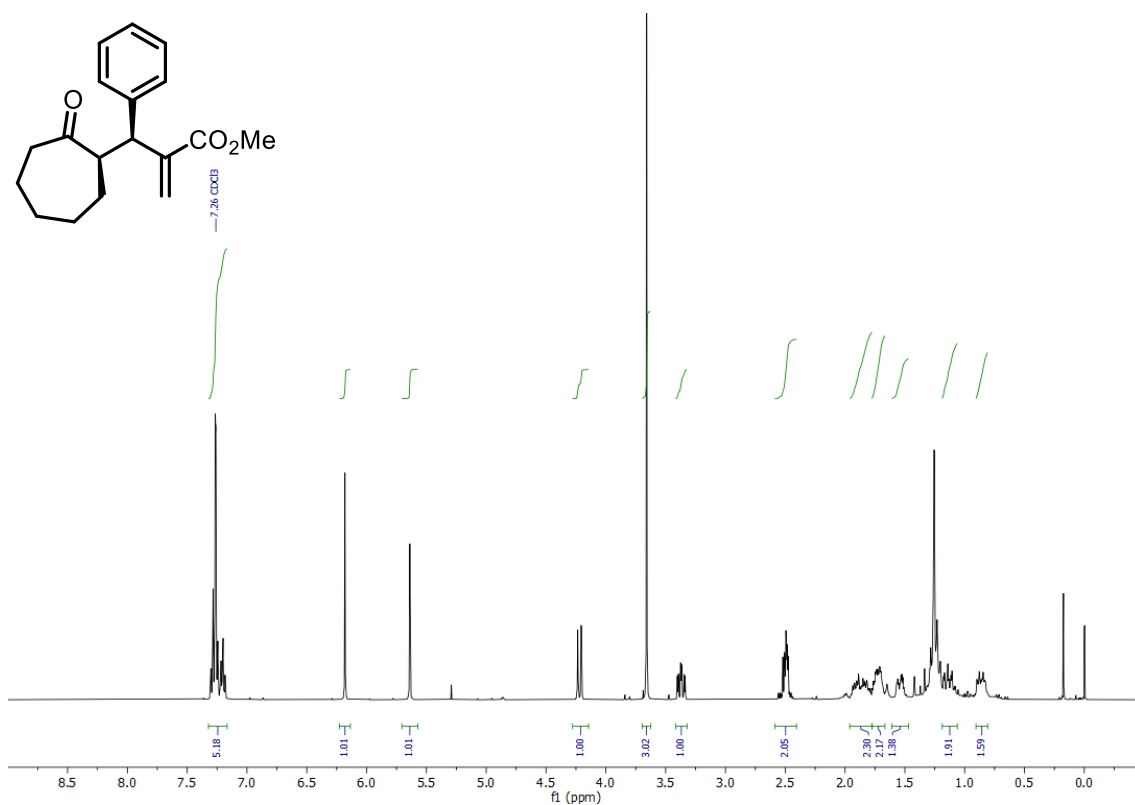

<sup>1</sup>H NMR spectra of **3g**.

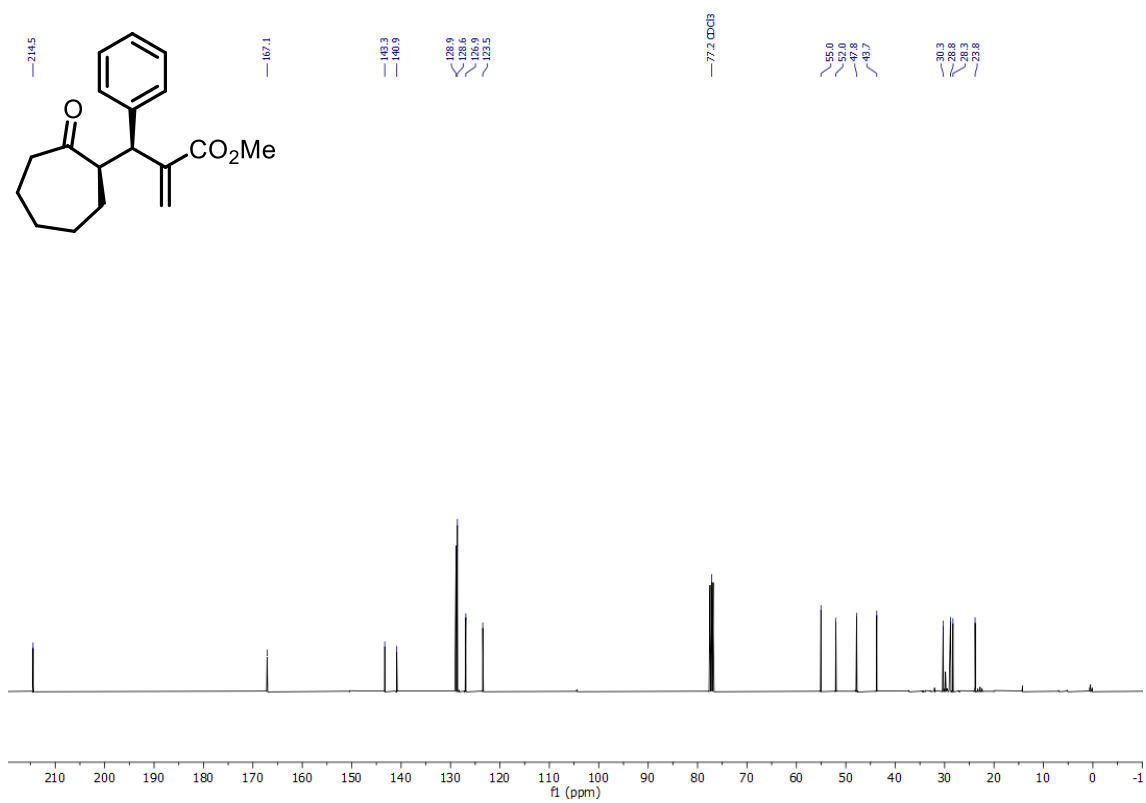

<sup>13</sup>C NMR spectra of **3g**.

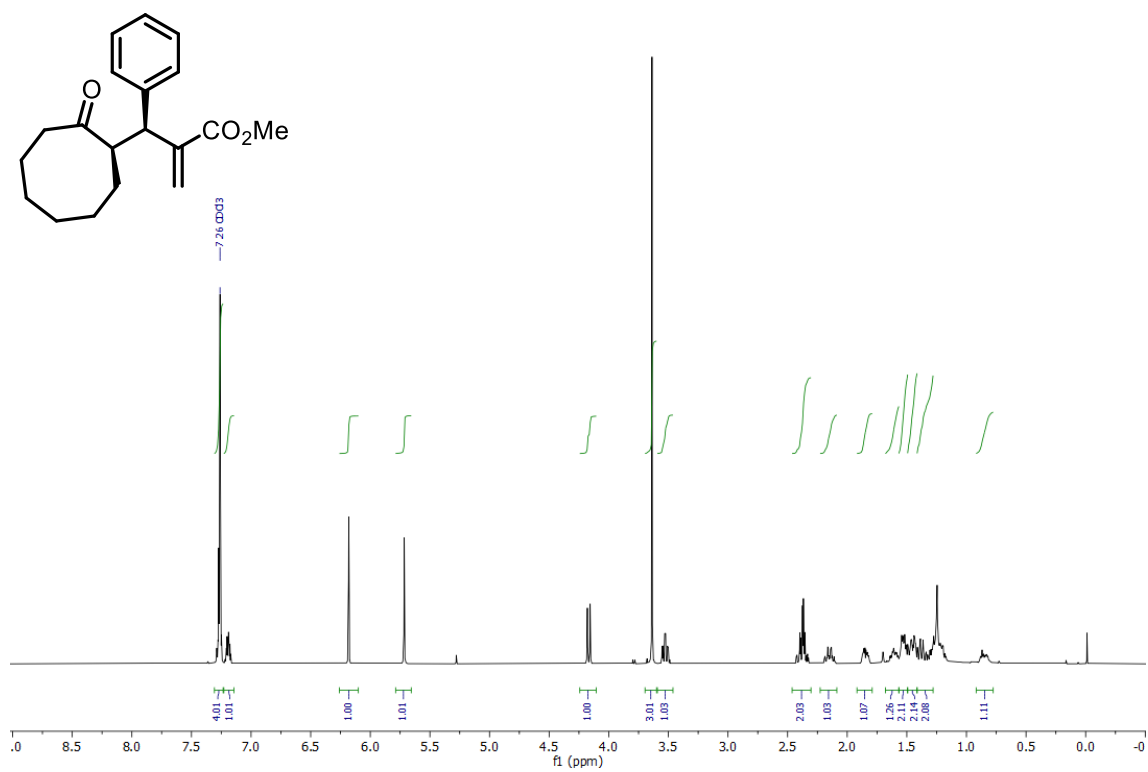

<sup>1</sup>H NMR spectra of **3h**.

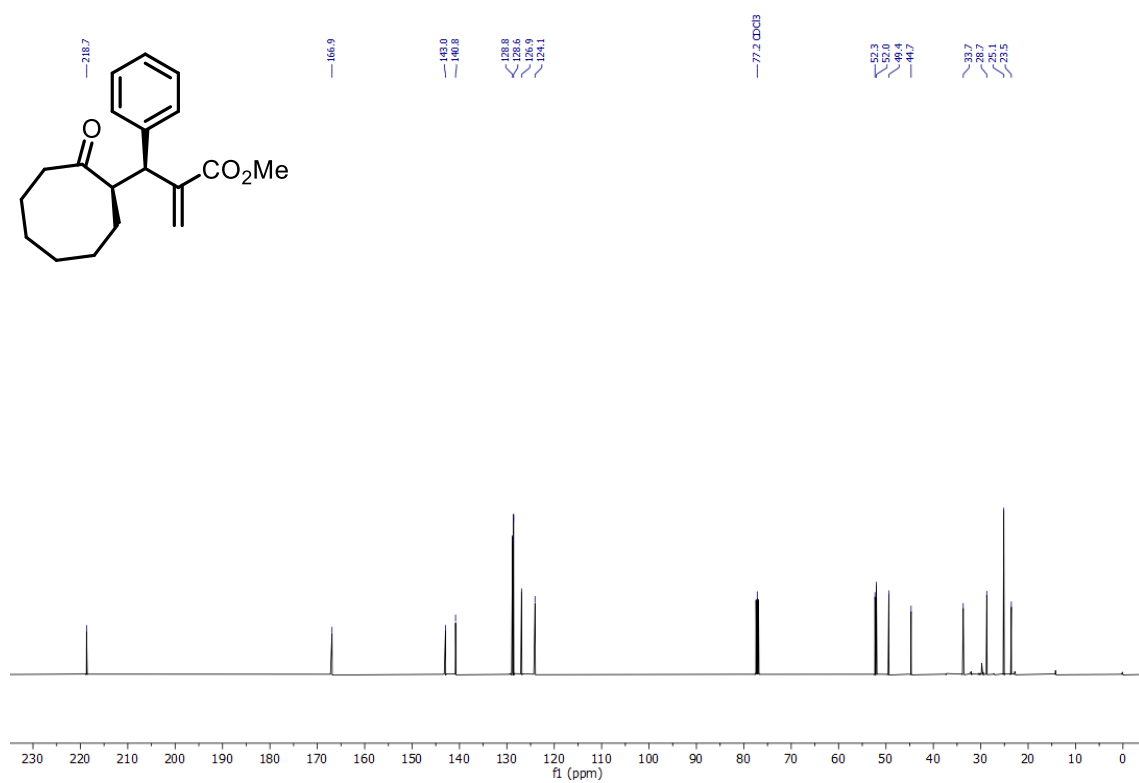

<sup>13</sup>C NMR spectra of **3h**.

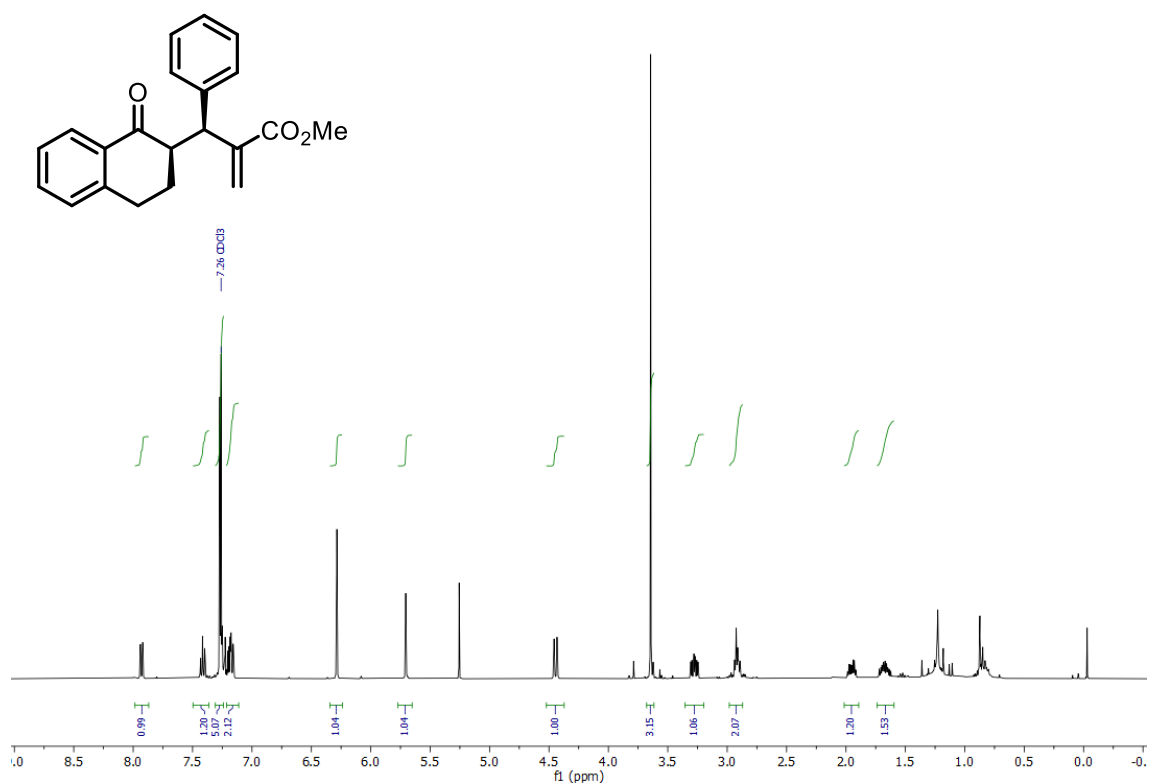

<sup>1</sup>H NMR spectra of **3i**.

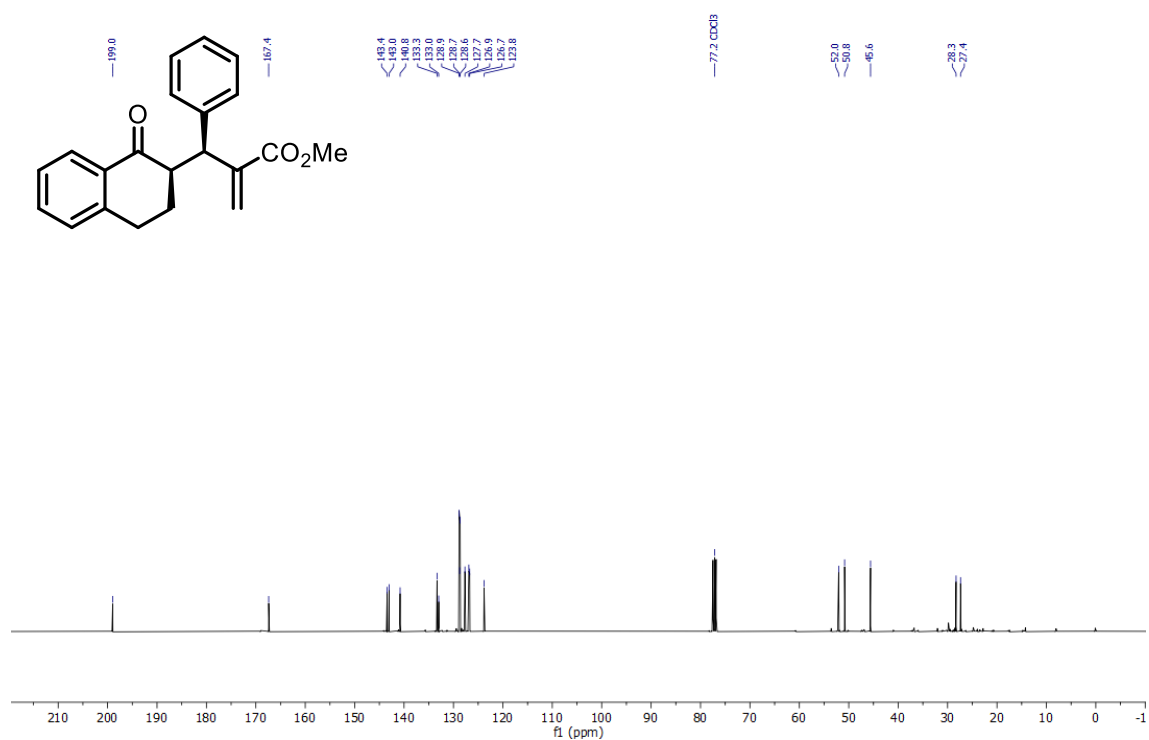

<sup>13</sup>C NMR spectra of **3i**.

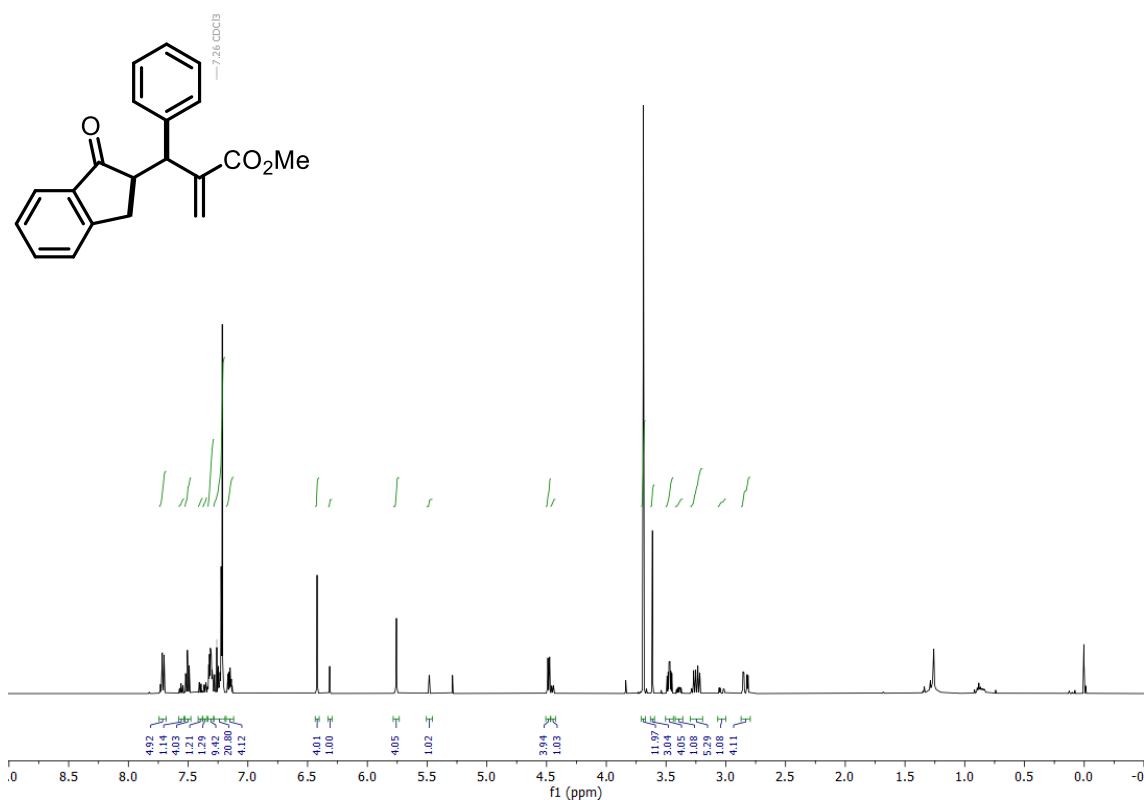

<sup>1</sup>H NMR spectra of **3j** (mixture of diastereomers).

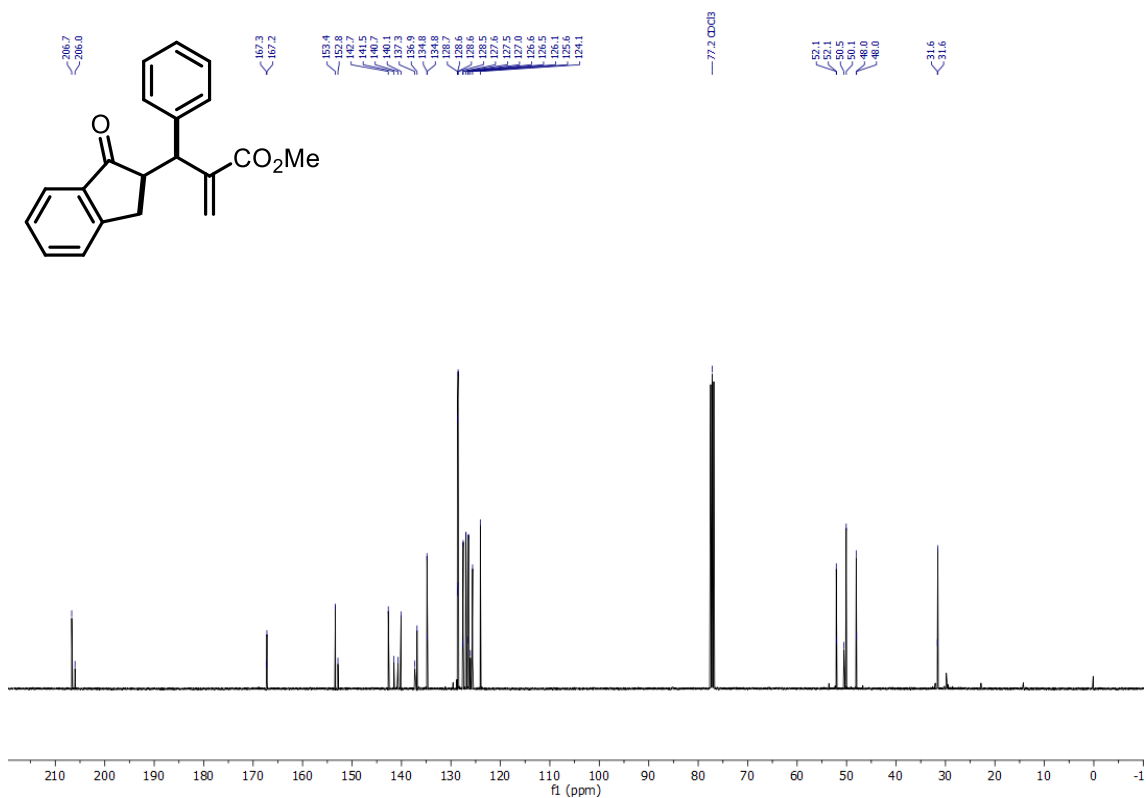

<sup>13</sup>C NMR spectra of **3j** (mixture of diastereomers).

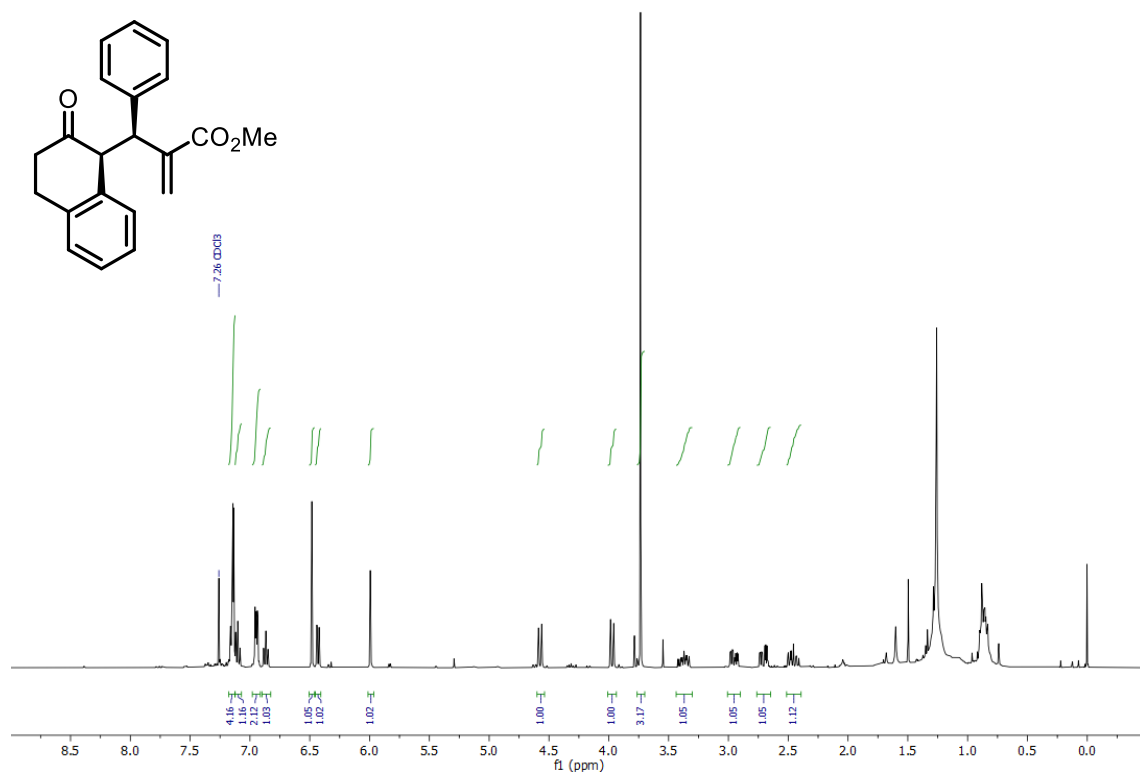

<sup>1</sup>H NMR spectra of **3k**.

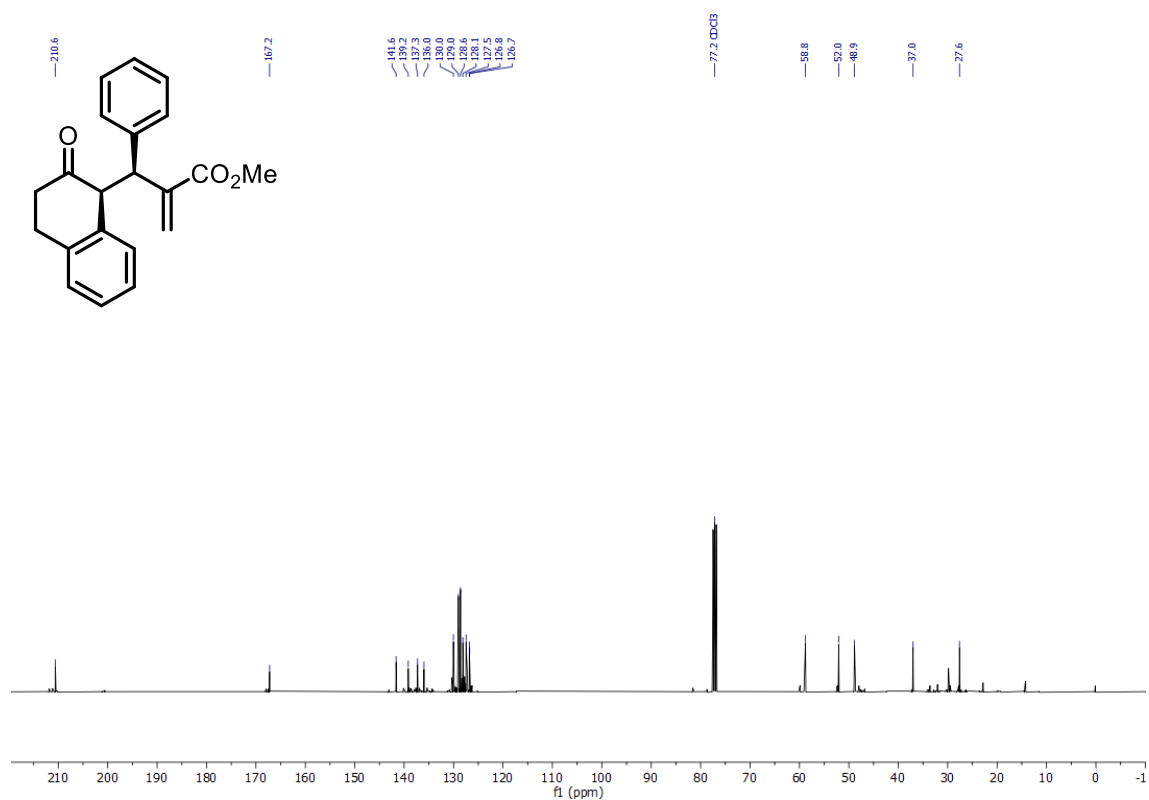

<sup>13</sup>C NMR spectra of **3k**.

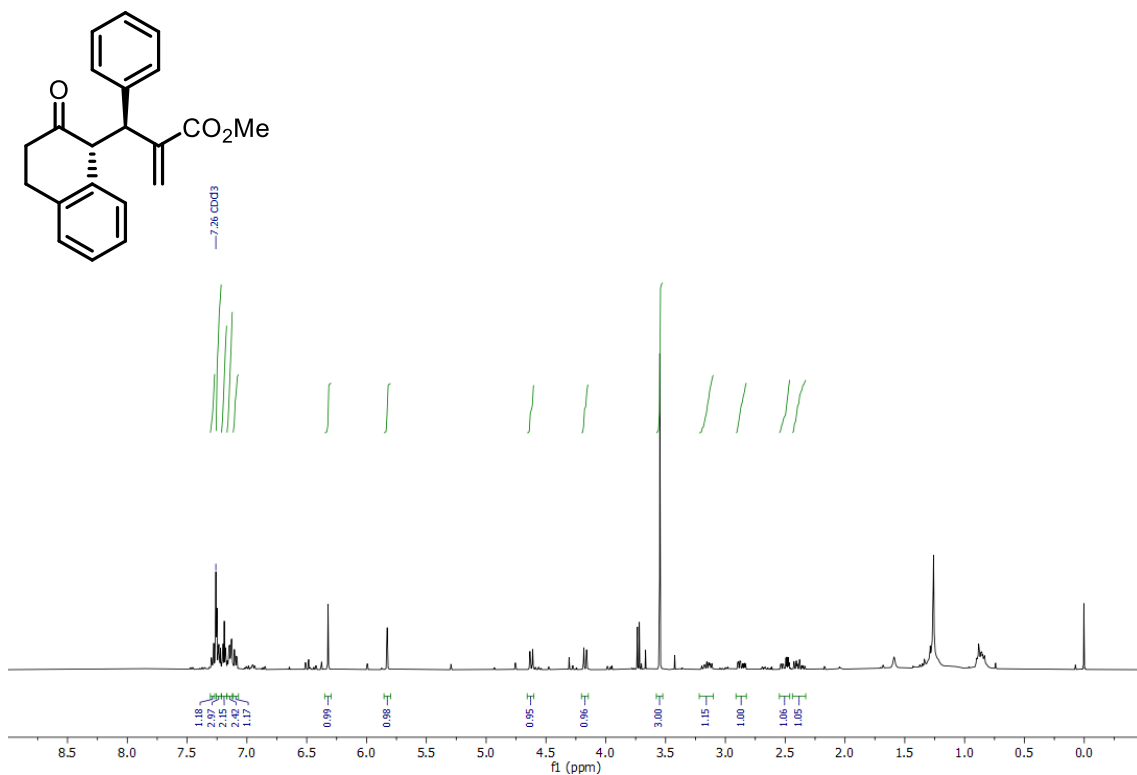

$^1\text{H}$  NMR spectra of **3k'**.

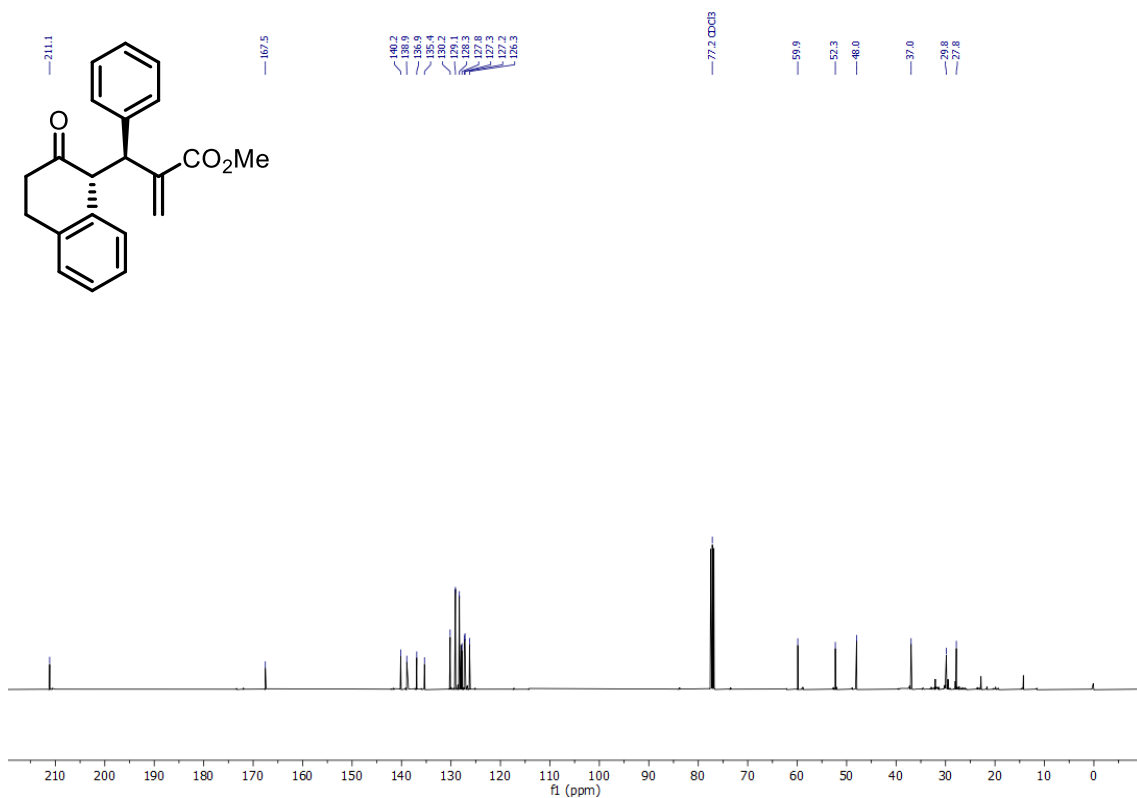

$^{13}\text{C}$  NMR spectra of **3k'**.

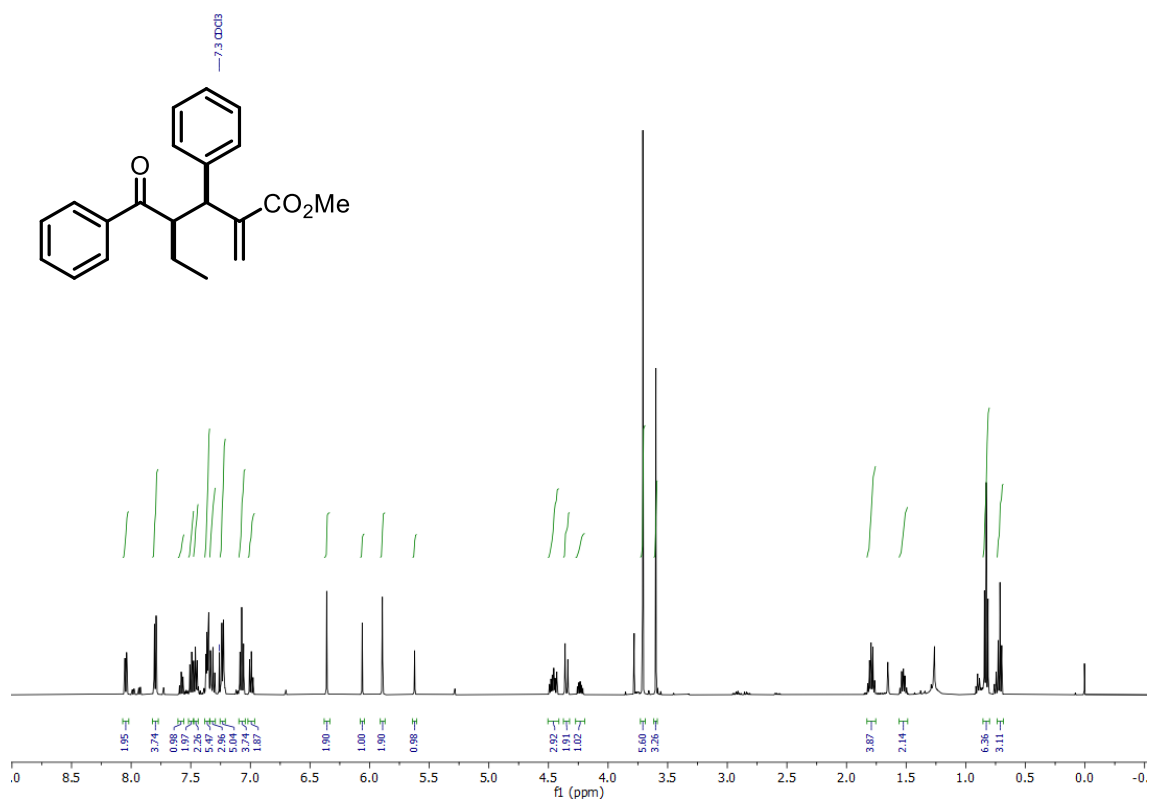

<sup>1</sup>H NMR spectra of **31** (mixture of diastereomers).

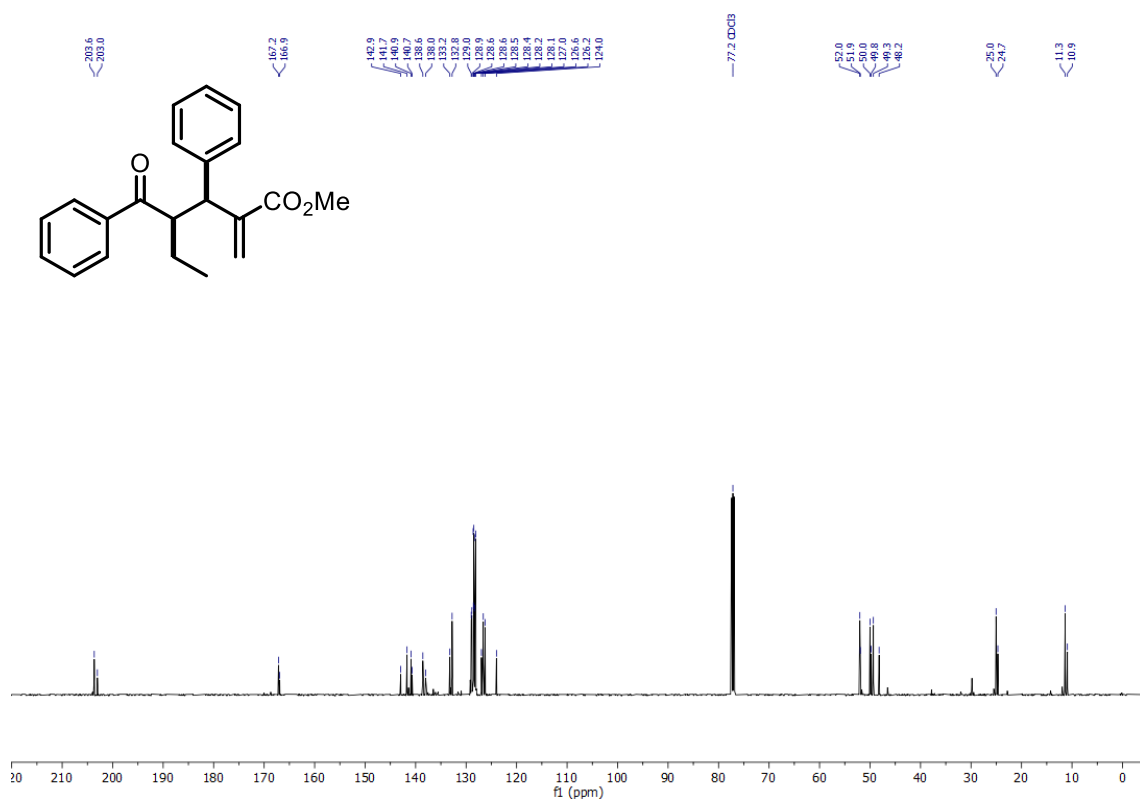

<sup>13</sup>C NMR spectra of **31** (mixture of diastereomers).

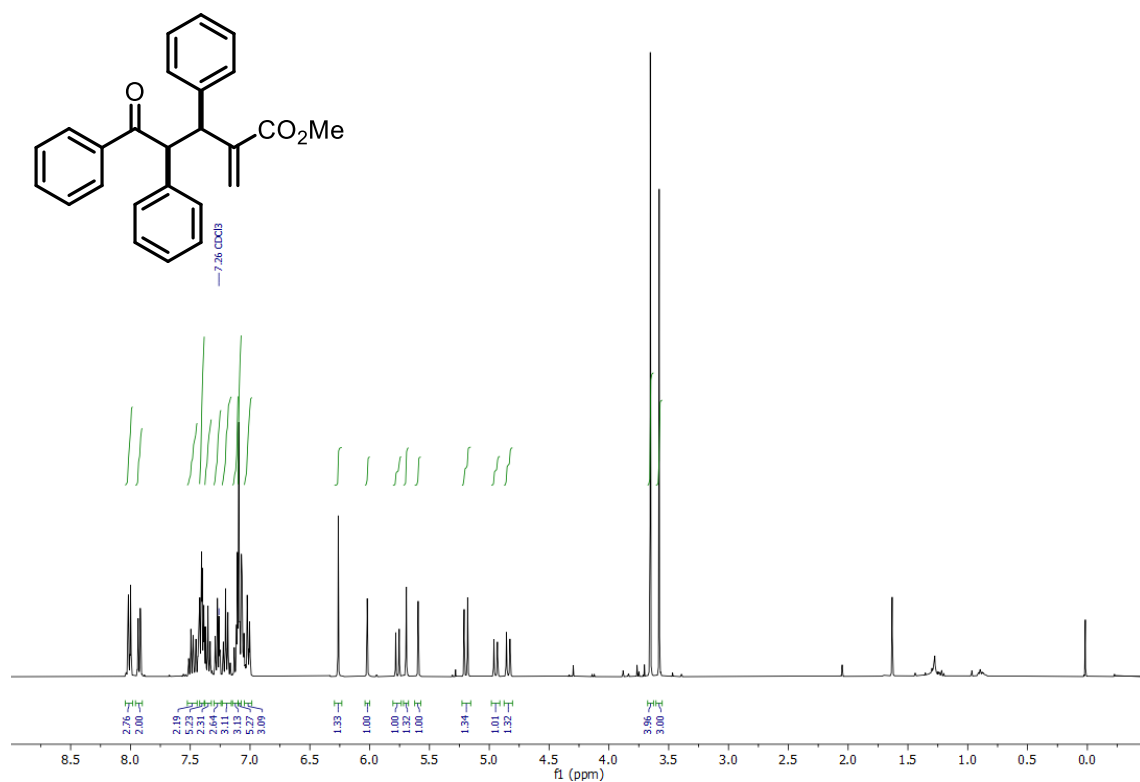

<sup>1</sup>H NMR spectra of **3m** (mixture of diastereomers).

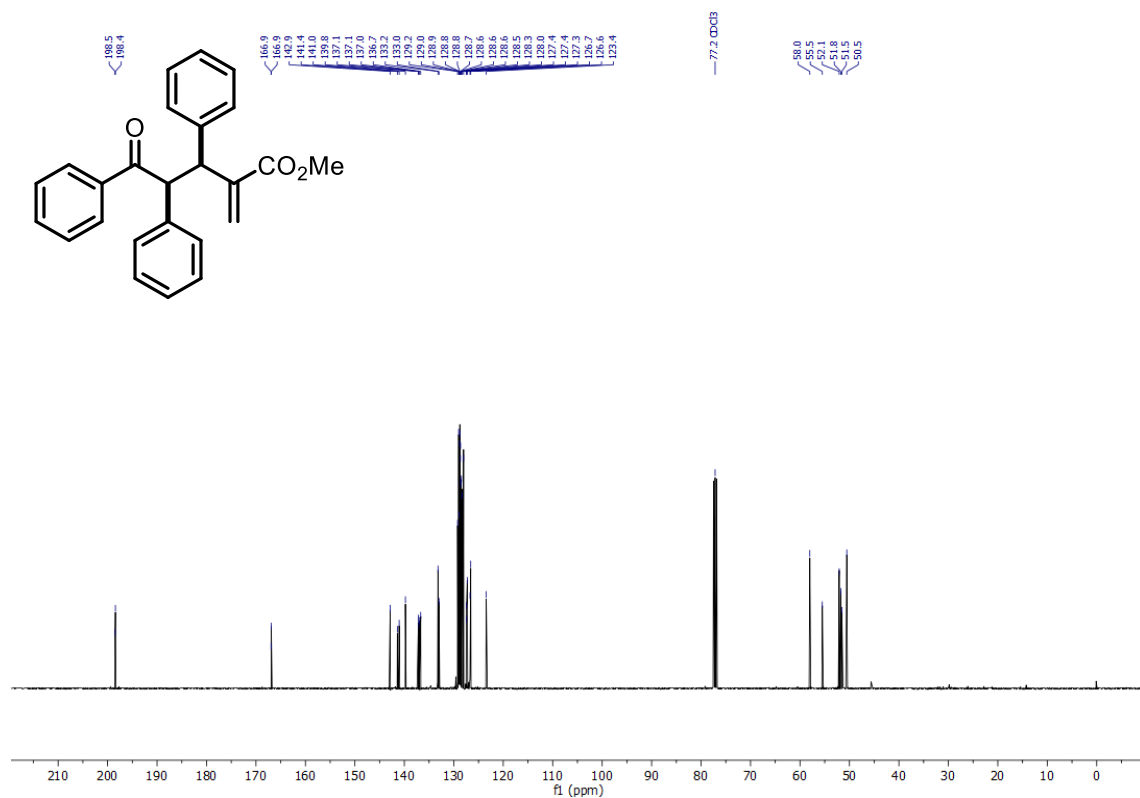

<sup>13</sup>C NMR spectra of **3m** (mixture of diastereomers).

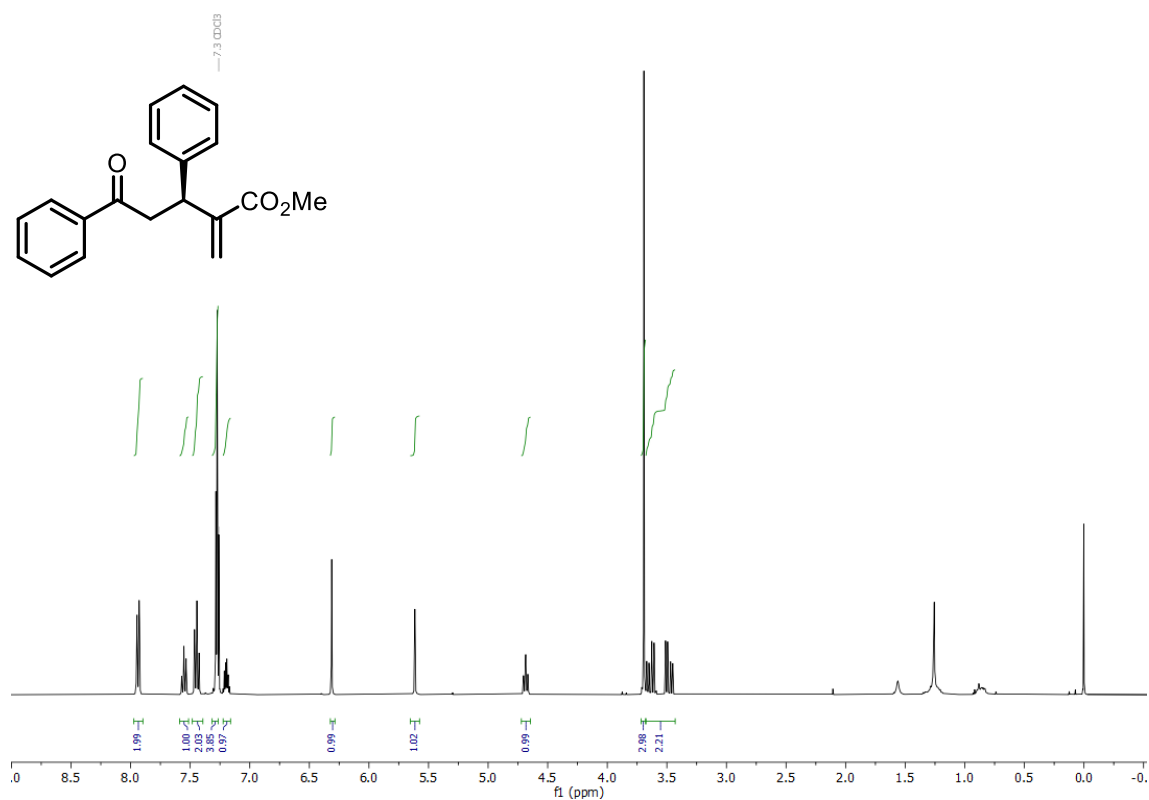

<sup>1</sup>H NMR spectra of **3n**.

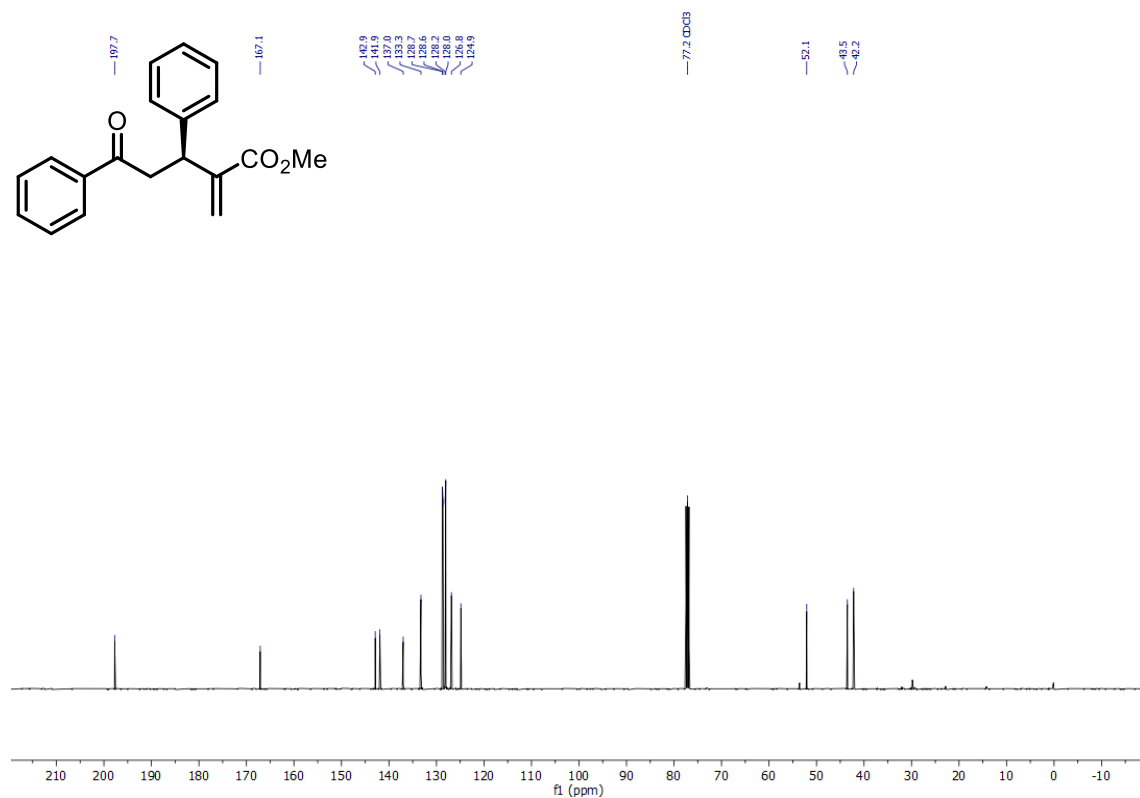

<sup>13</sup>C NMR spectra of **3n**.

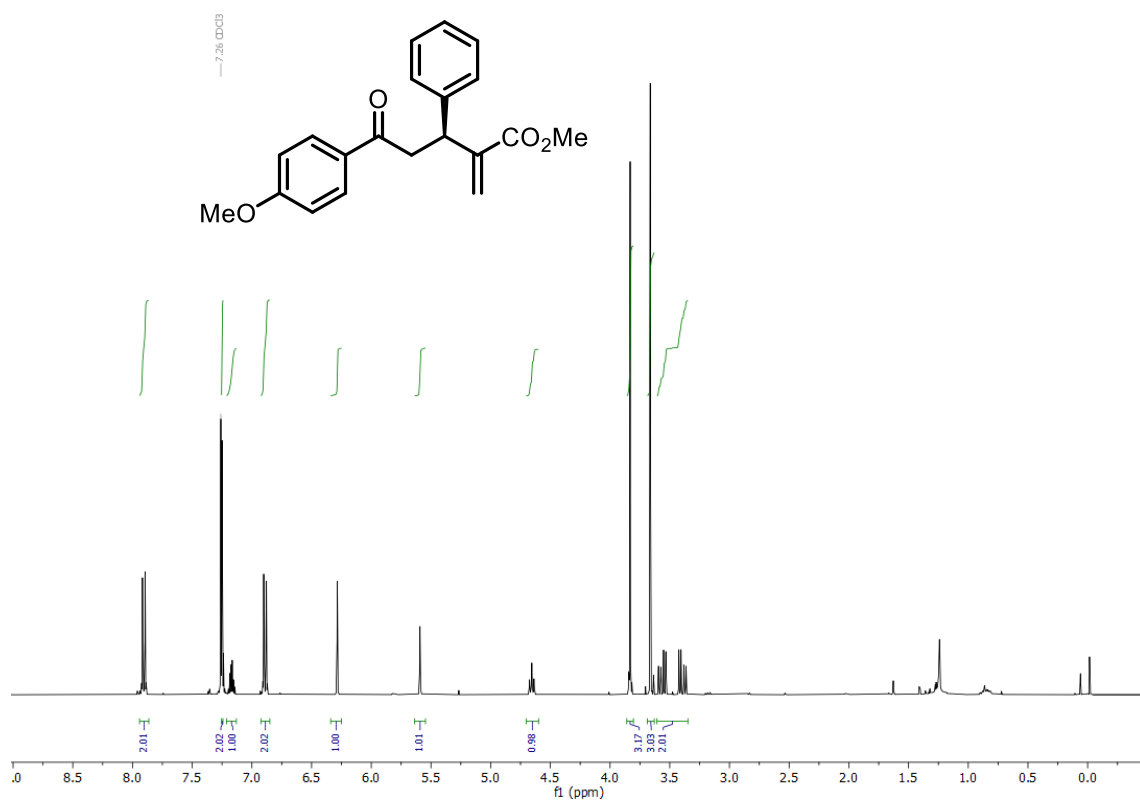

<sup>1</sup>H NMR spectra of **30**.

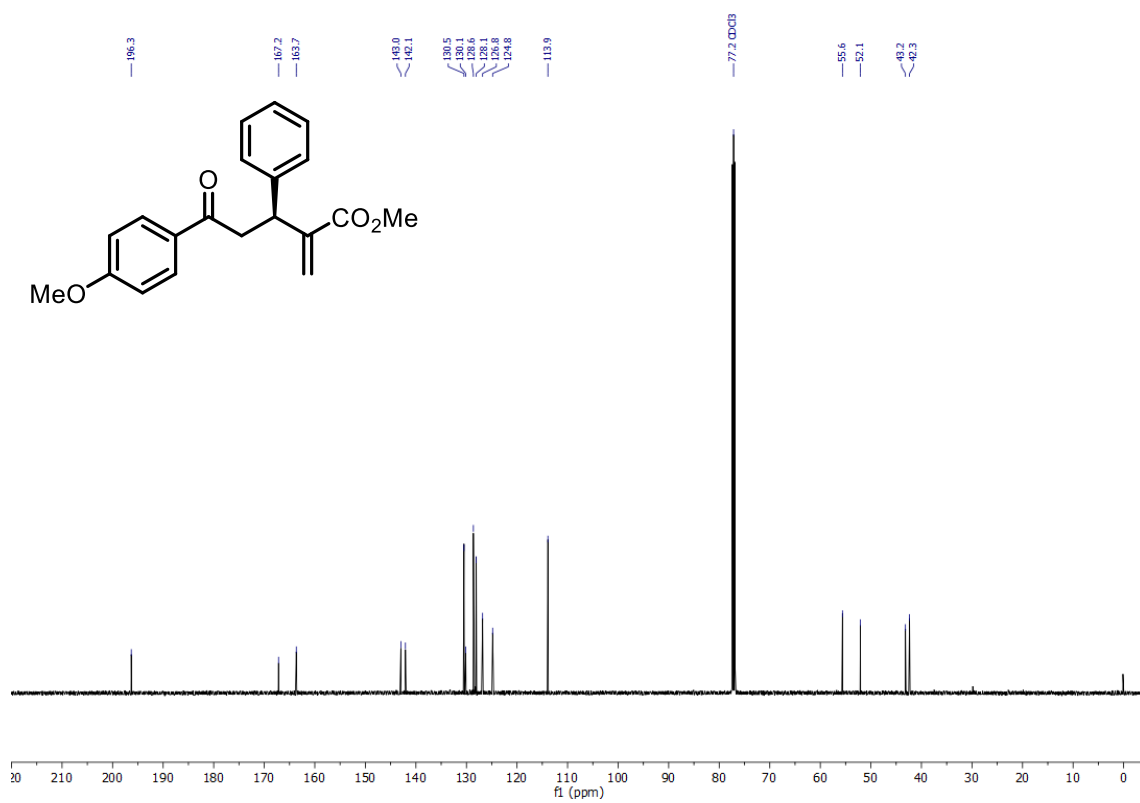

<sup>13</sup>C NMR spectra of **30**.

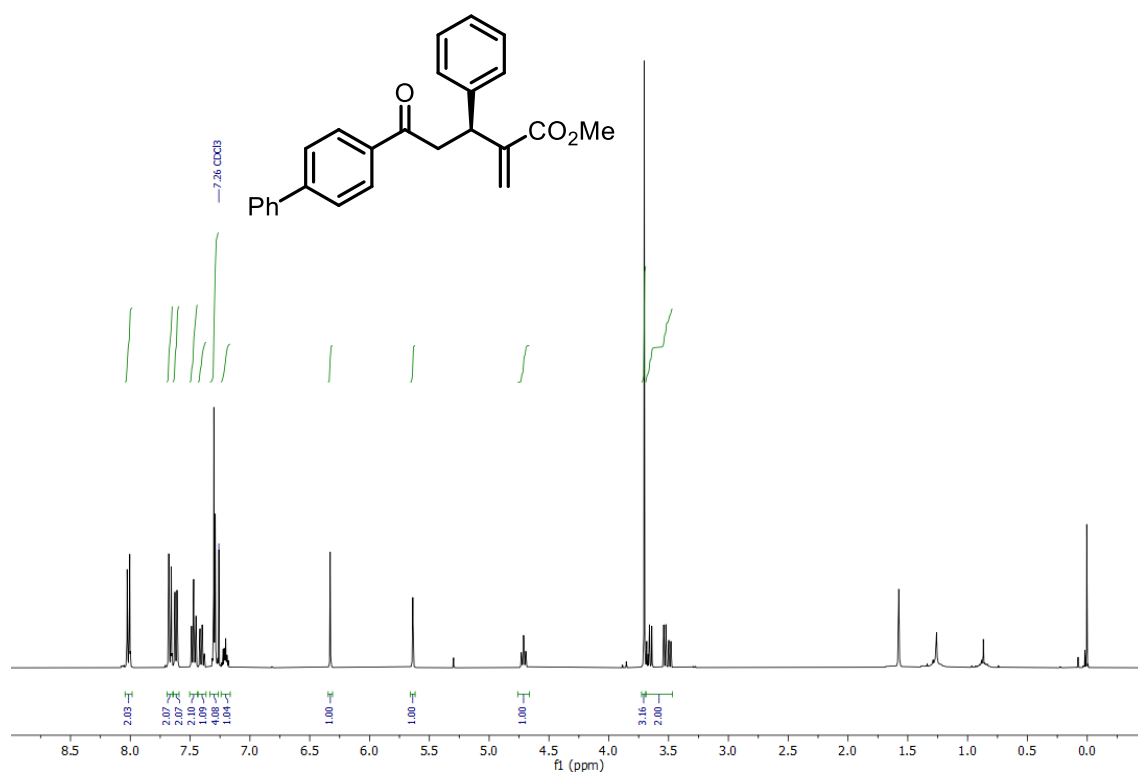

<sup>1</sup>H NMR spectra of **3p**.

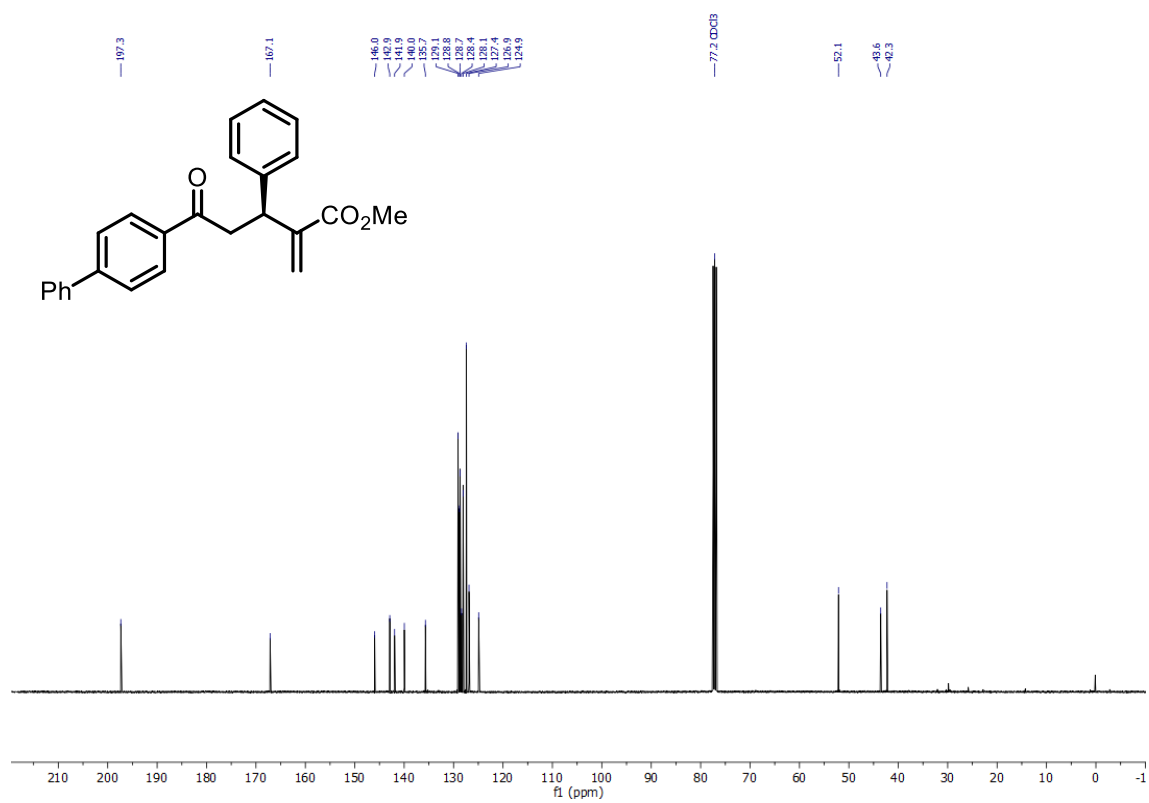

<sup>13</sup>C NMR spectra of **3p**.

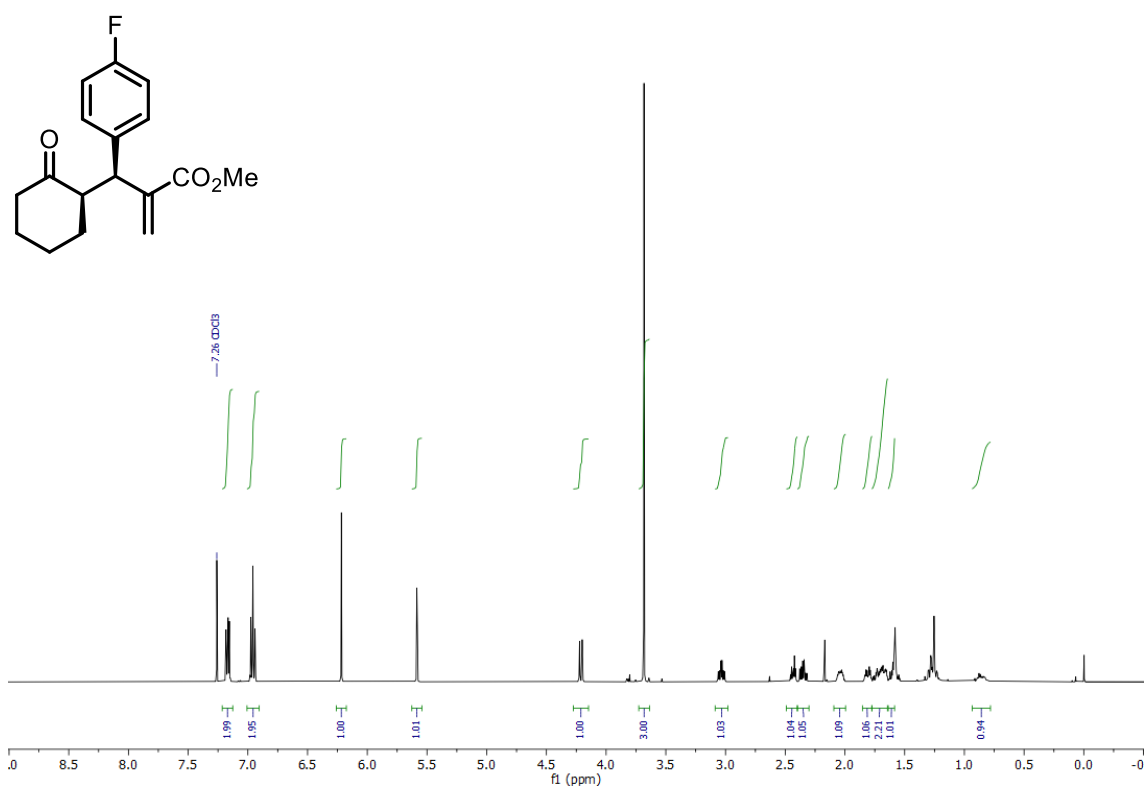

<sup>1</sup>H NMR spectra of **3q**.

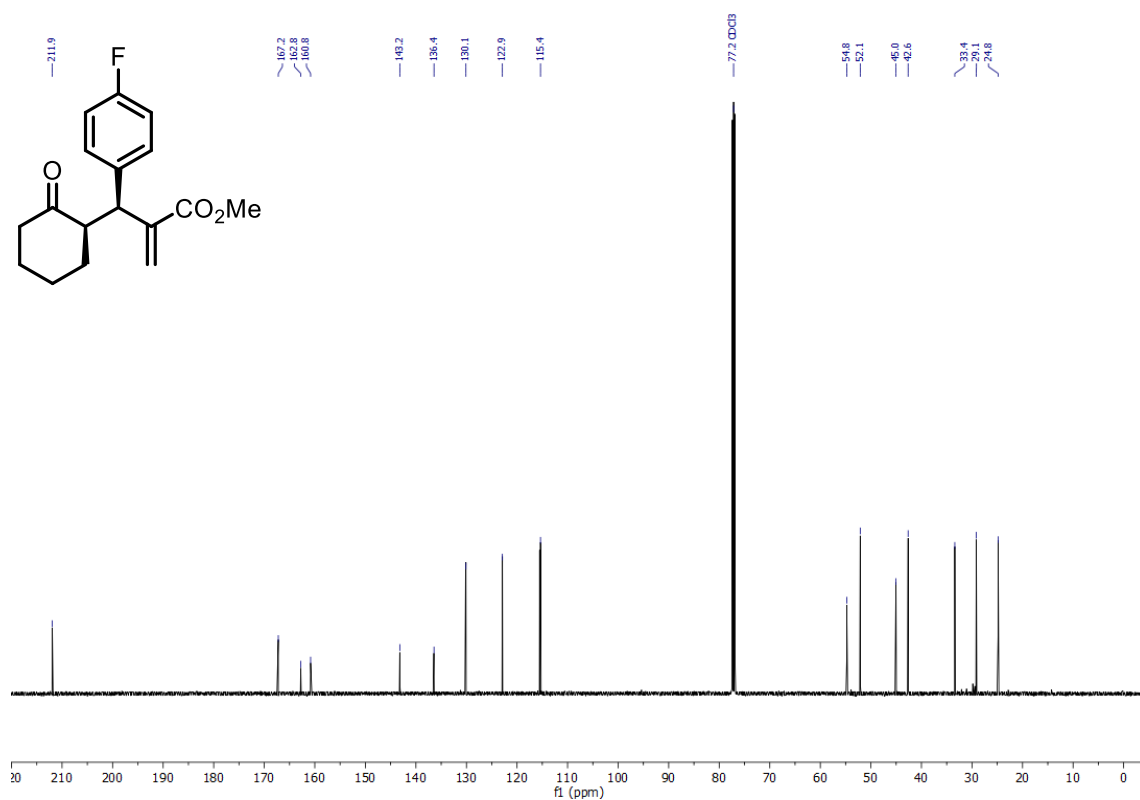

<sup>13</sup>C NMR spectra of **3q**.

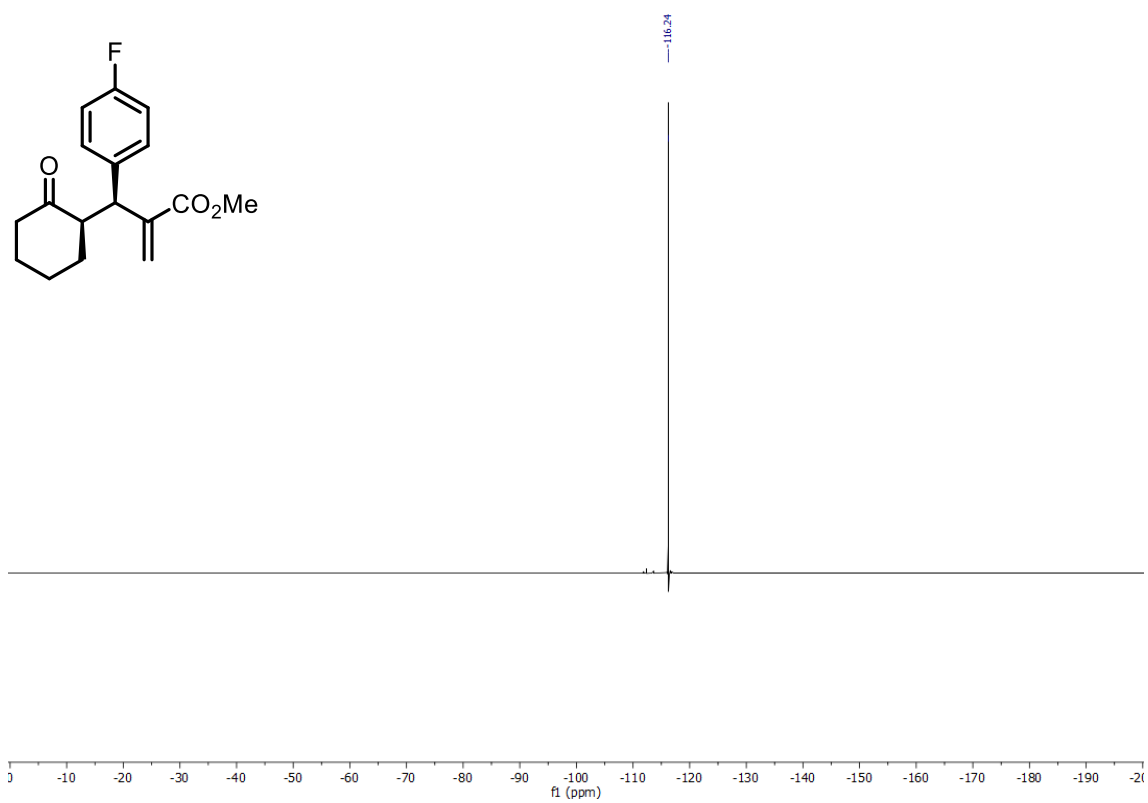

$^{19}\text{F}$  NMR spectra of **3q**.

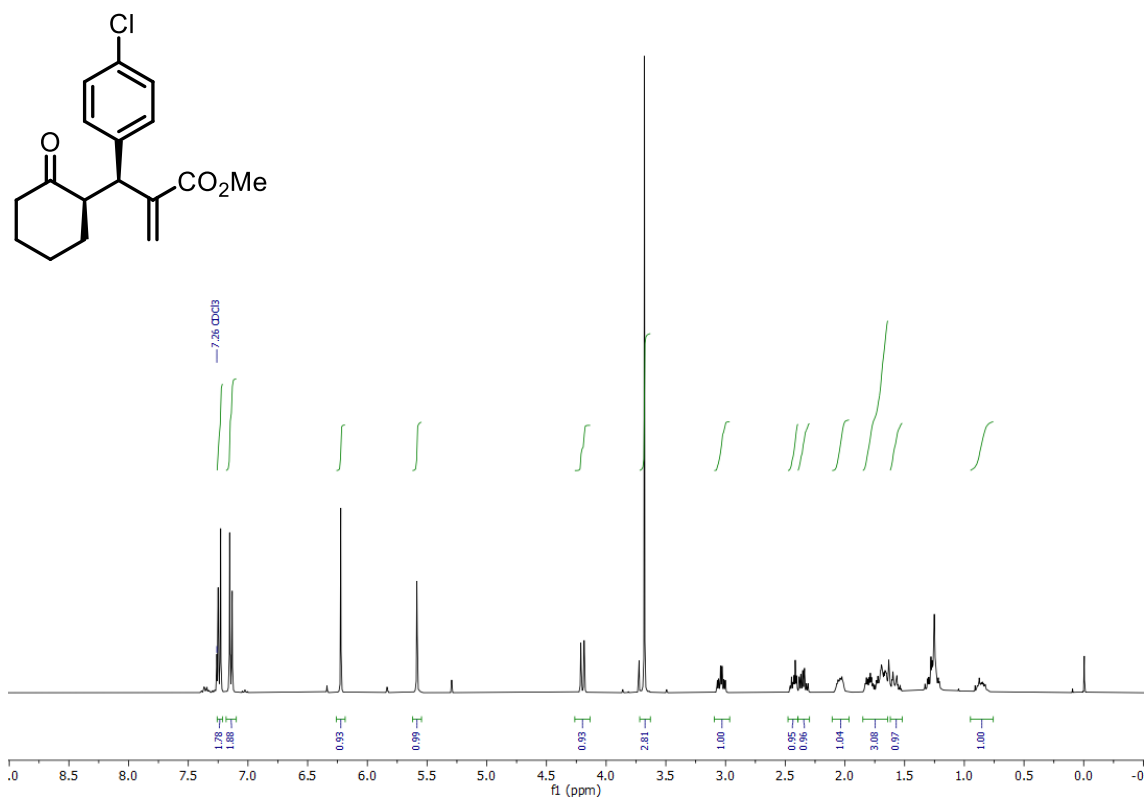

<sup>1</sup>H NMR spectra of **3r**.

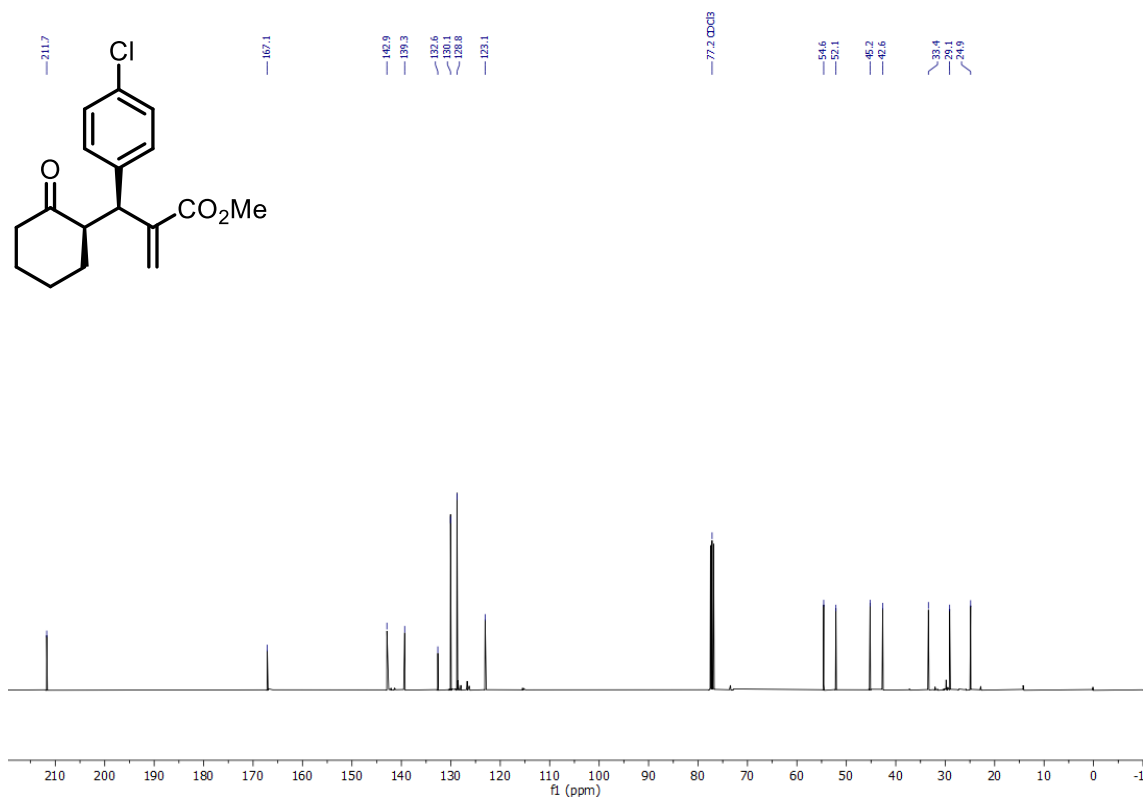

<sup>13</sup>C NMR spectra of **3r**.

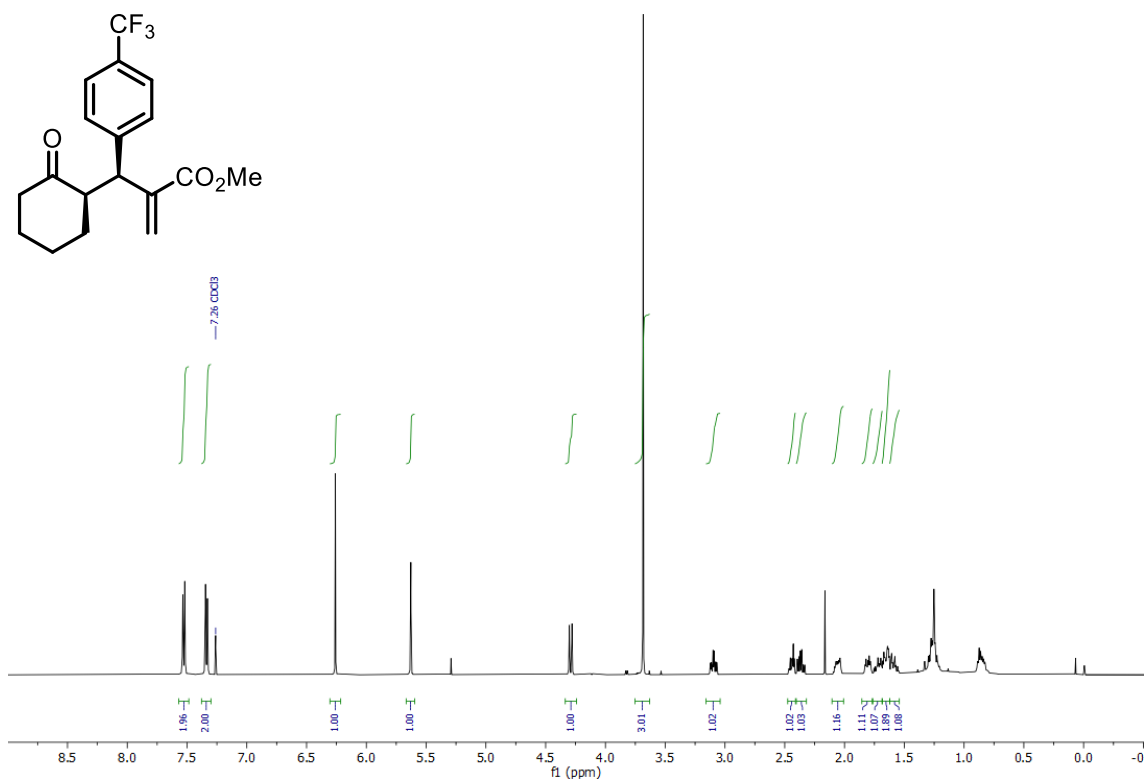

<sup>1</sup>H NMR spectra of **3s**.

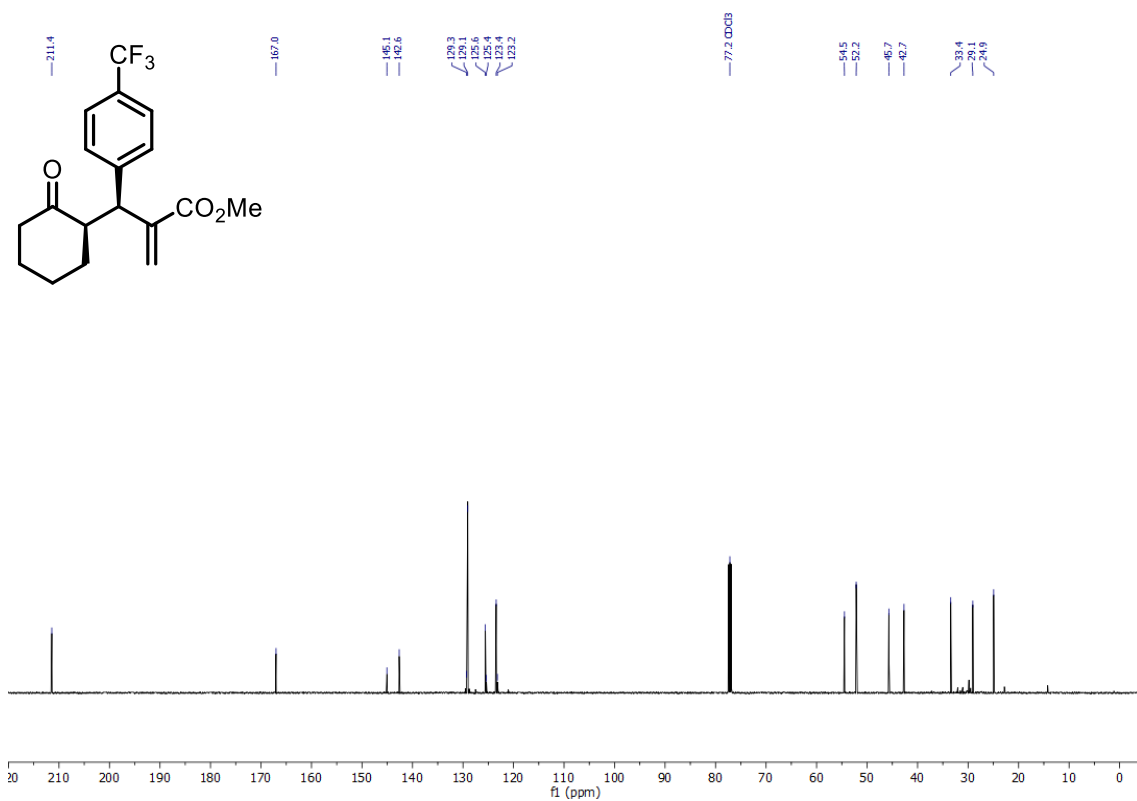

<sup>13</sup>C NMR spectra of **3s**.

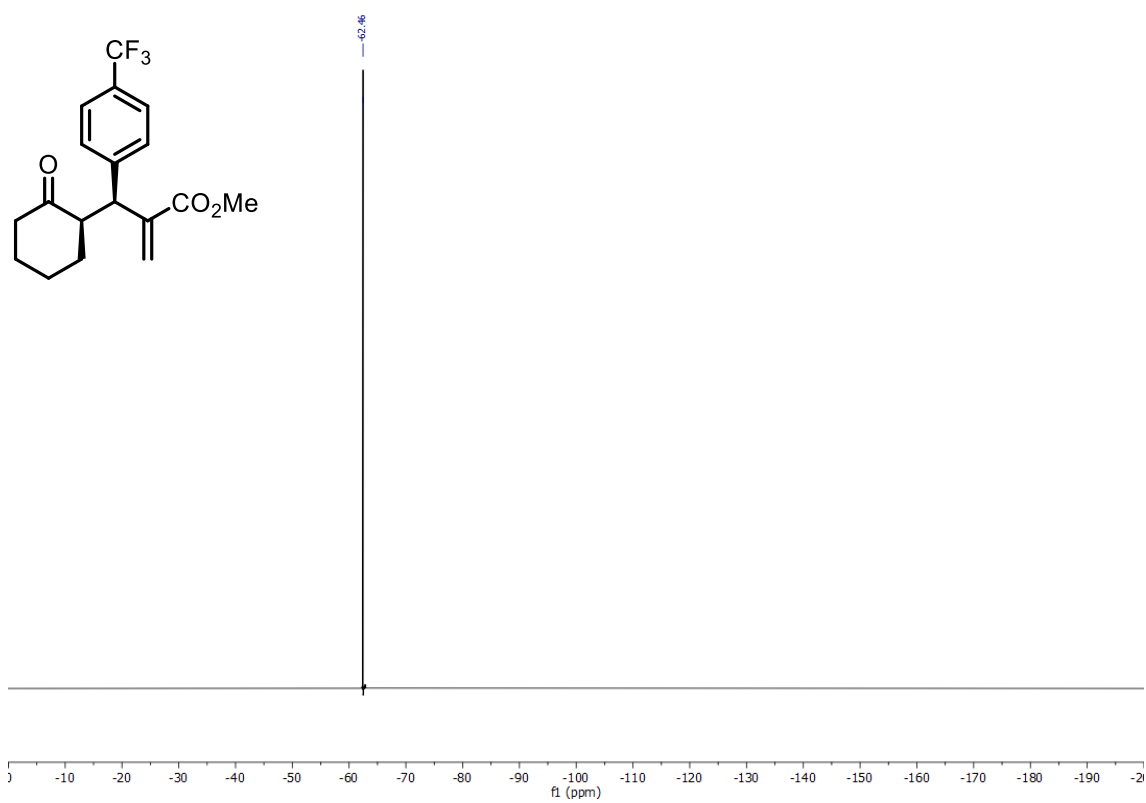

$^{19}\text{F}$  NMR spectra of **3s**.

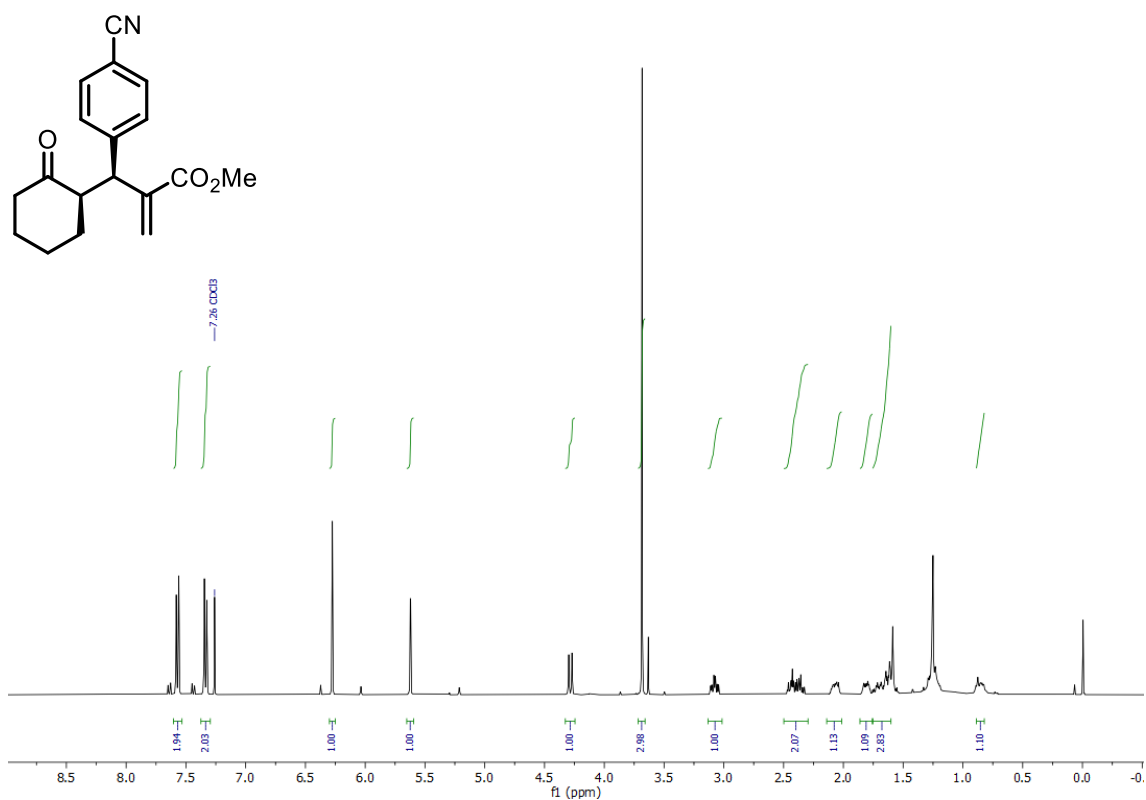

<sup>1</sup>H NMR spectra of **3t**.

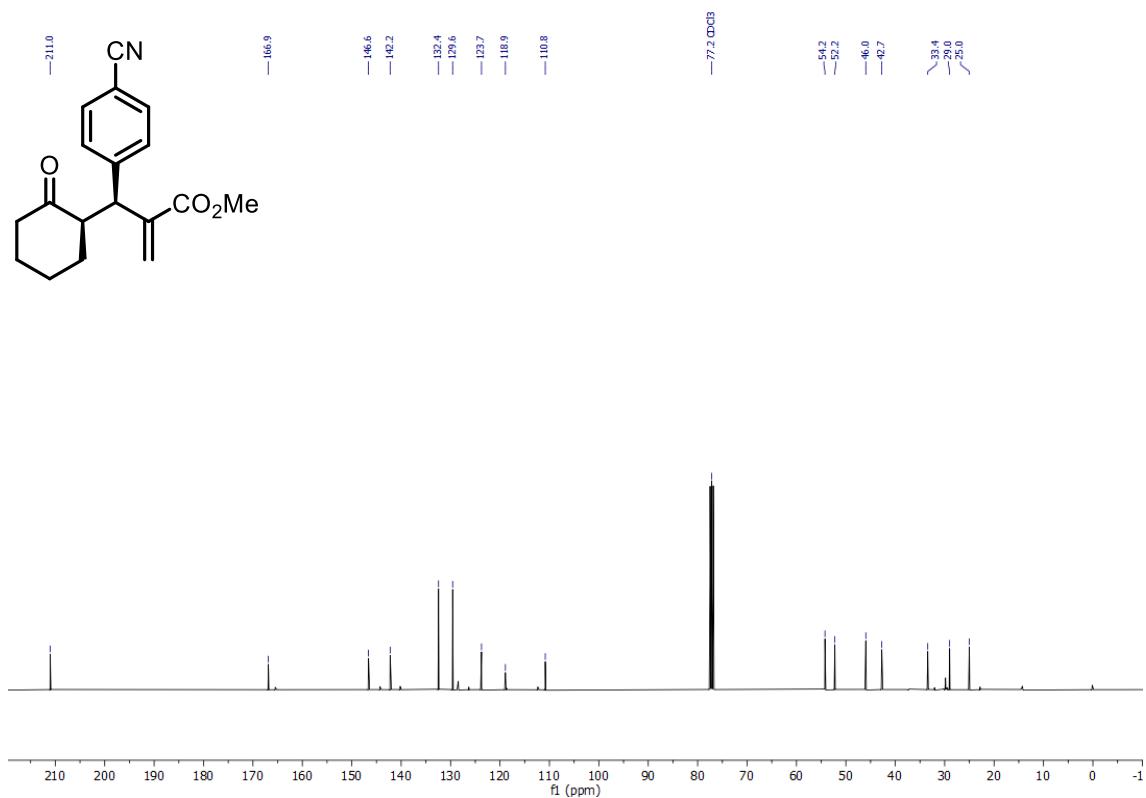

<sup>13</sup>C NMR spectra of **3t**.

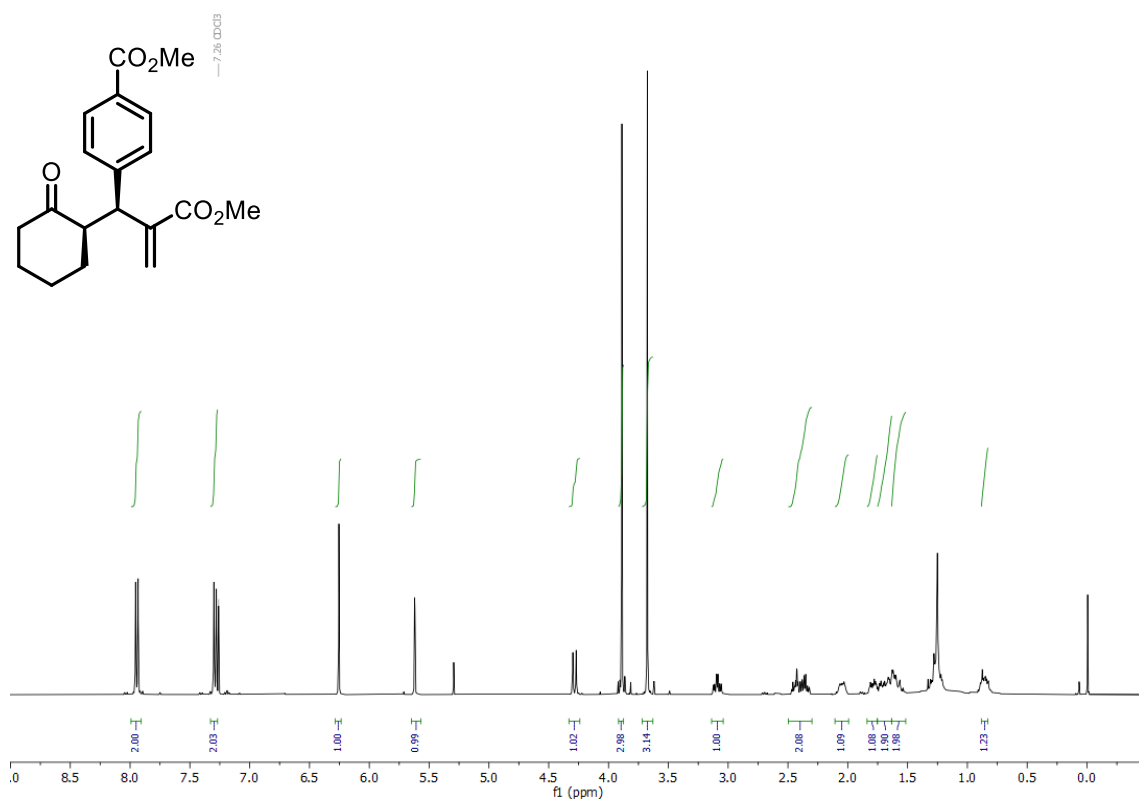

<sup>1</sup>H NMR spectra of **3u**.

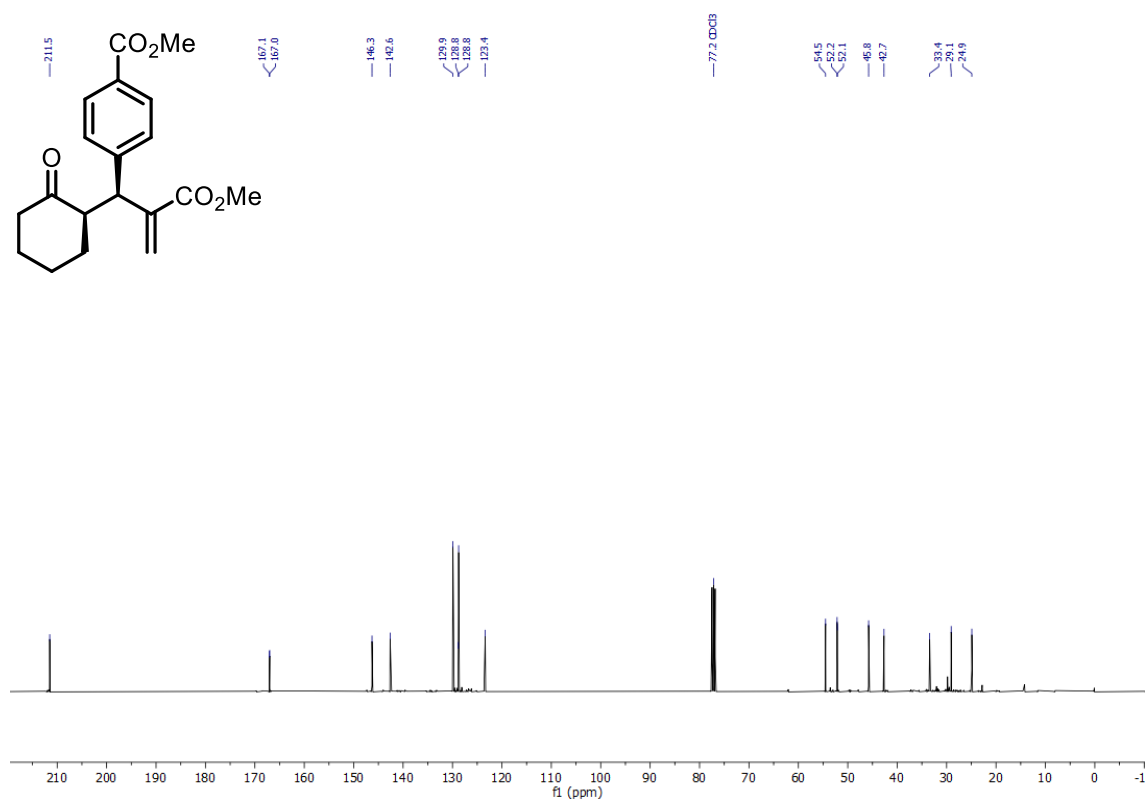

<sup>13</sup>C NMR spectra of **3u**.

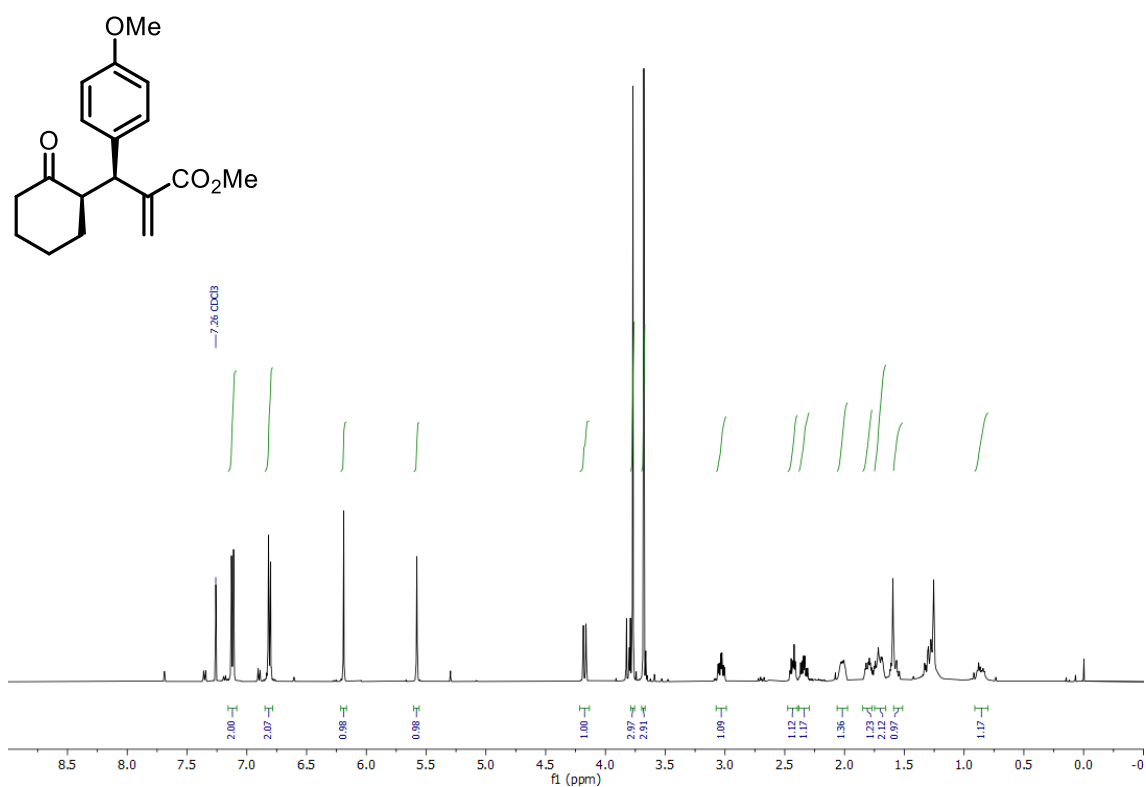

<sup>1</sup>H NMR spectra of **3v**.

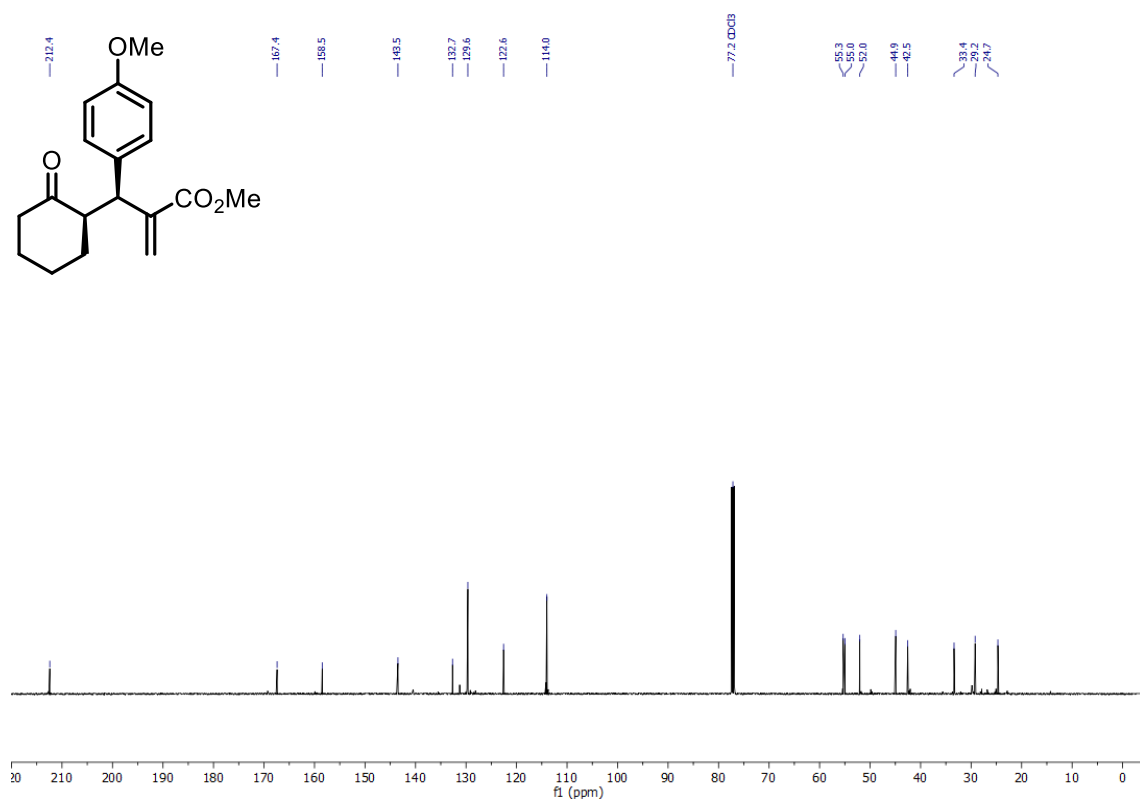

<sup>13</sup>C NMR spectra of **3v**.

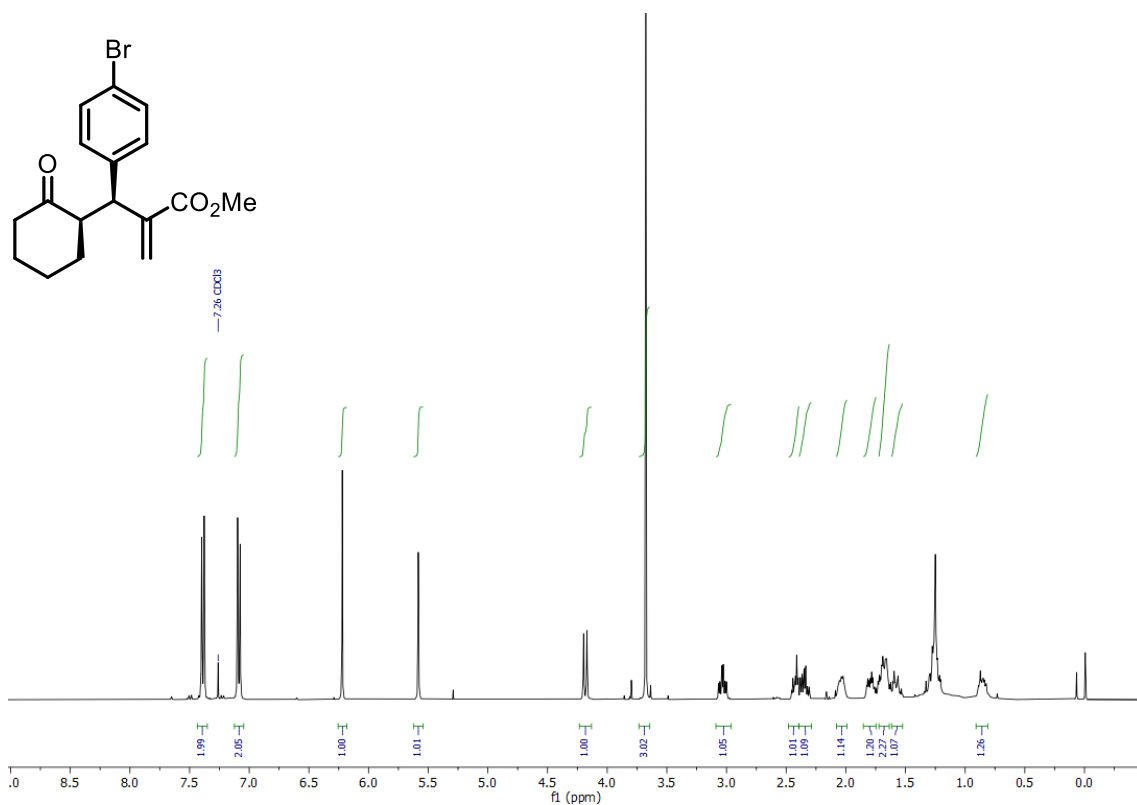

<sup>1</sup>H NMR spectra of **3w**.

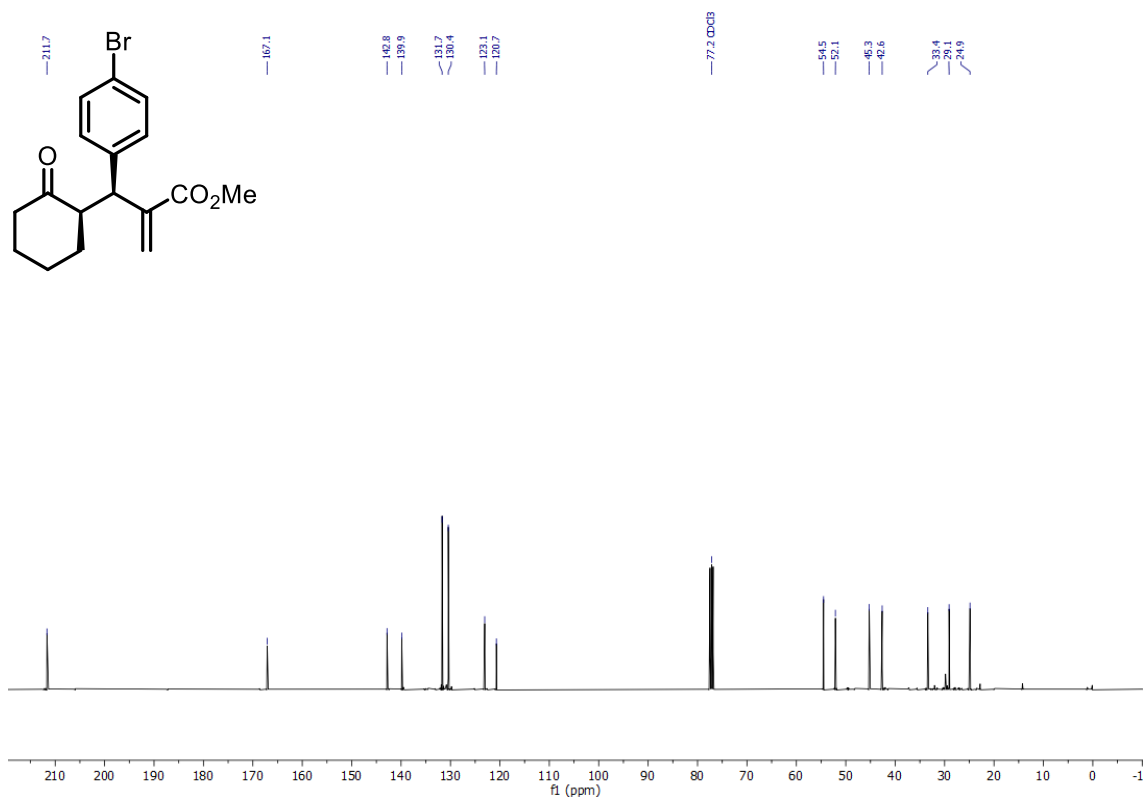

<sup>13</sup>C NMR spectra of **3w**.

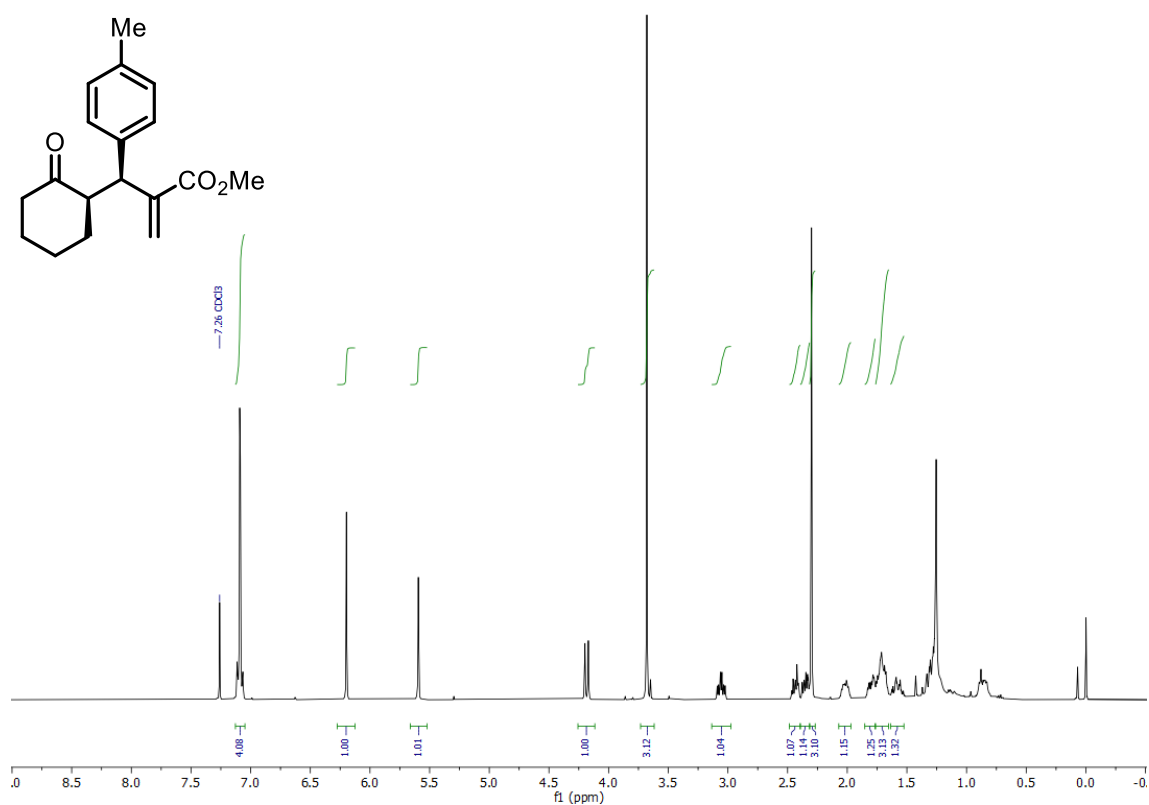

<sup>1</sup>H NMR spectra of **3x**.

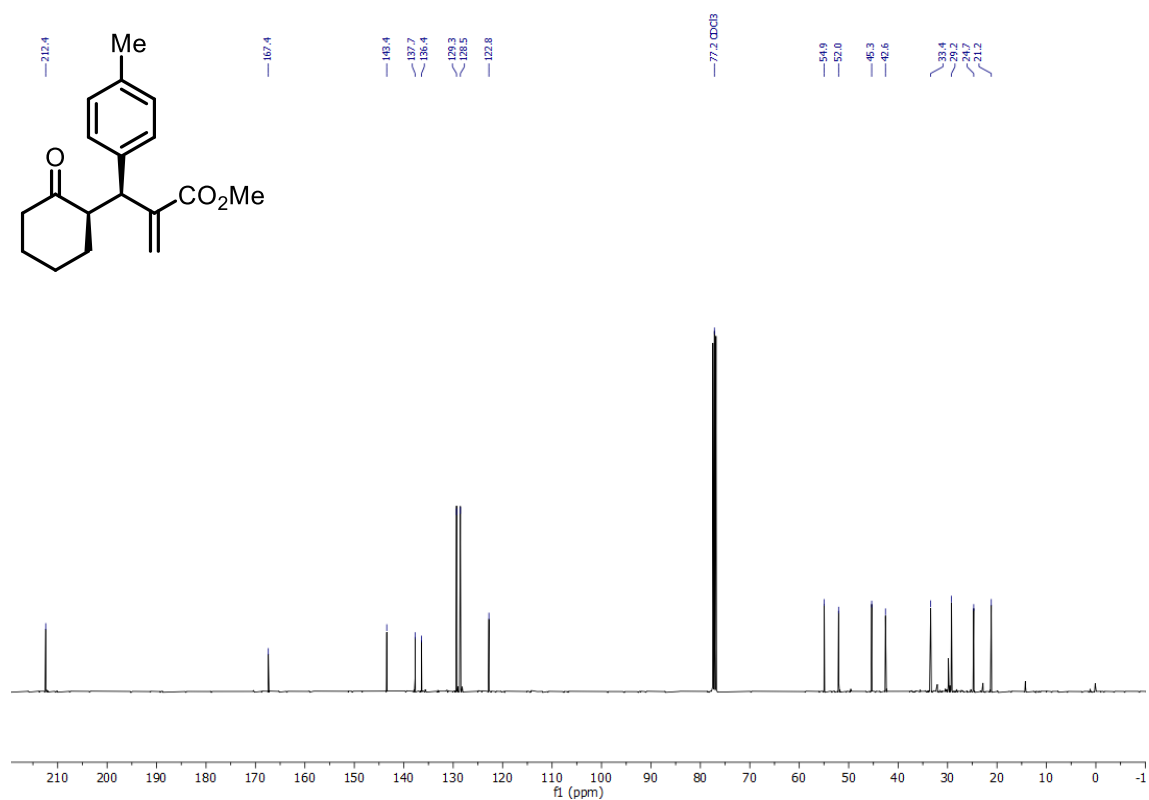

<sup>13</sup>C NMR spectra of **3x**.

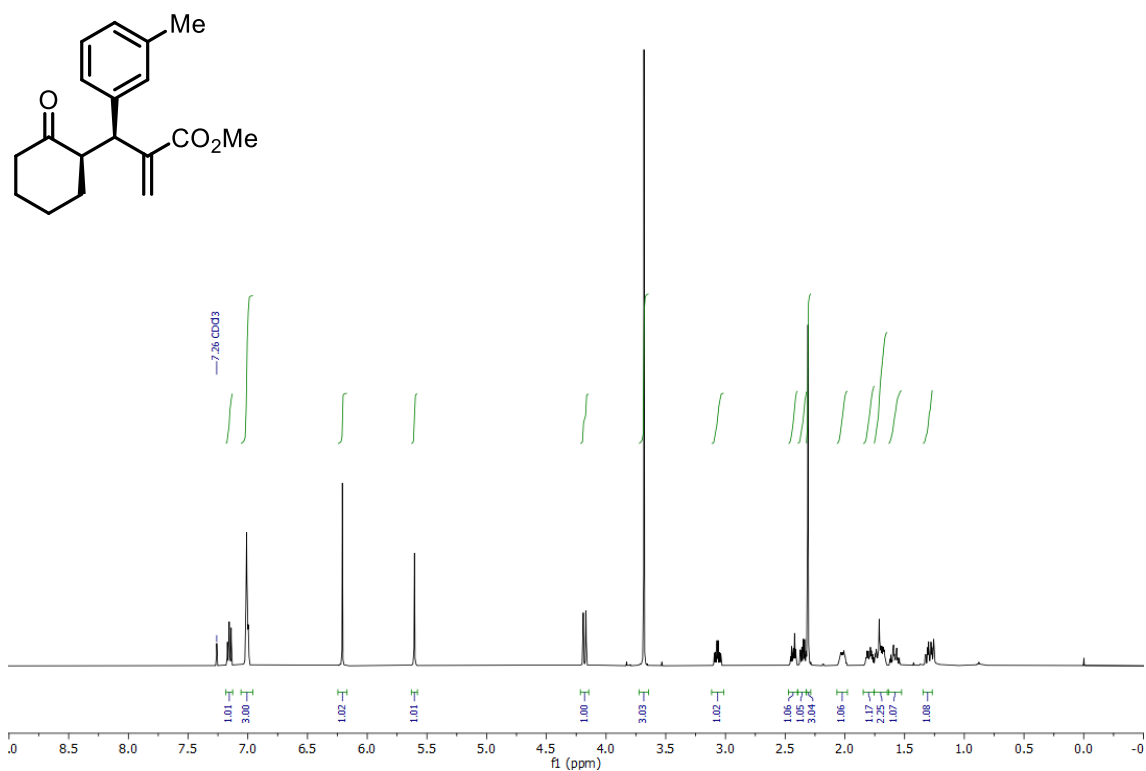

<sup>1</sup>H NMR spectra of **3y**.

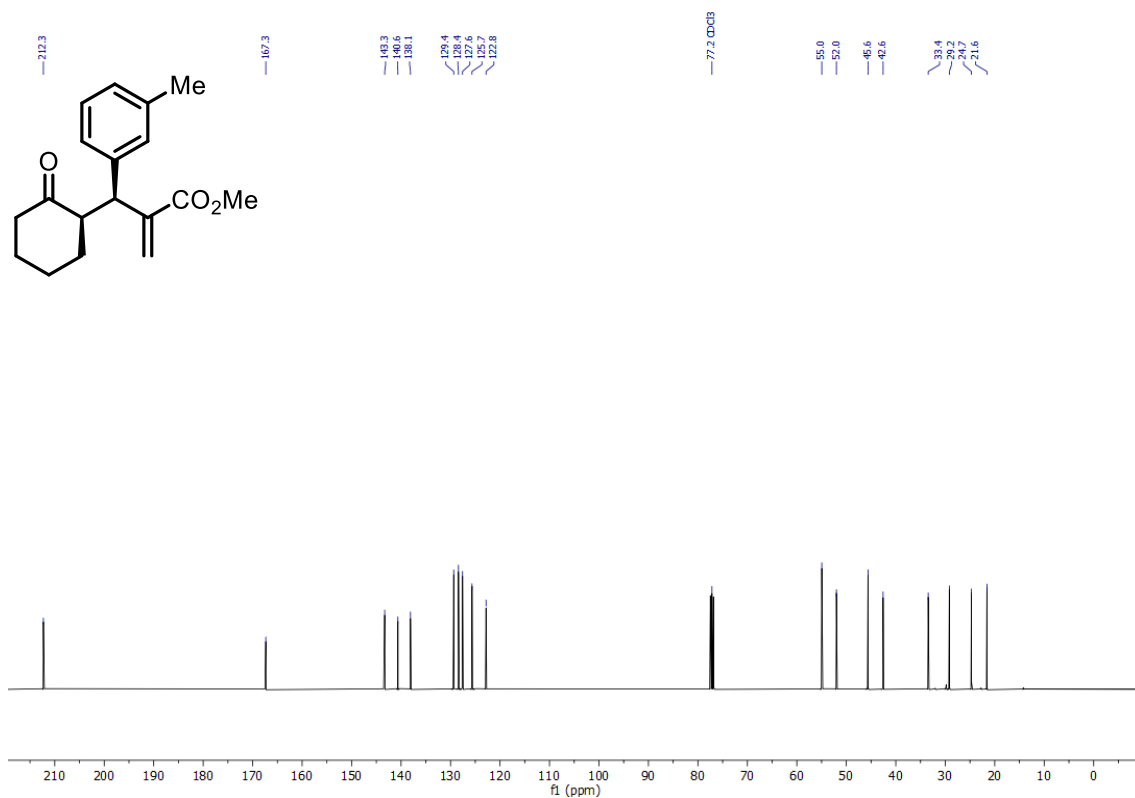

<sup>13</sup>C NMR spectra of **3y**.

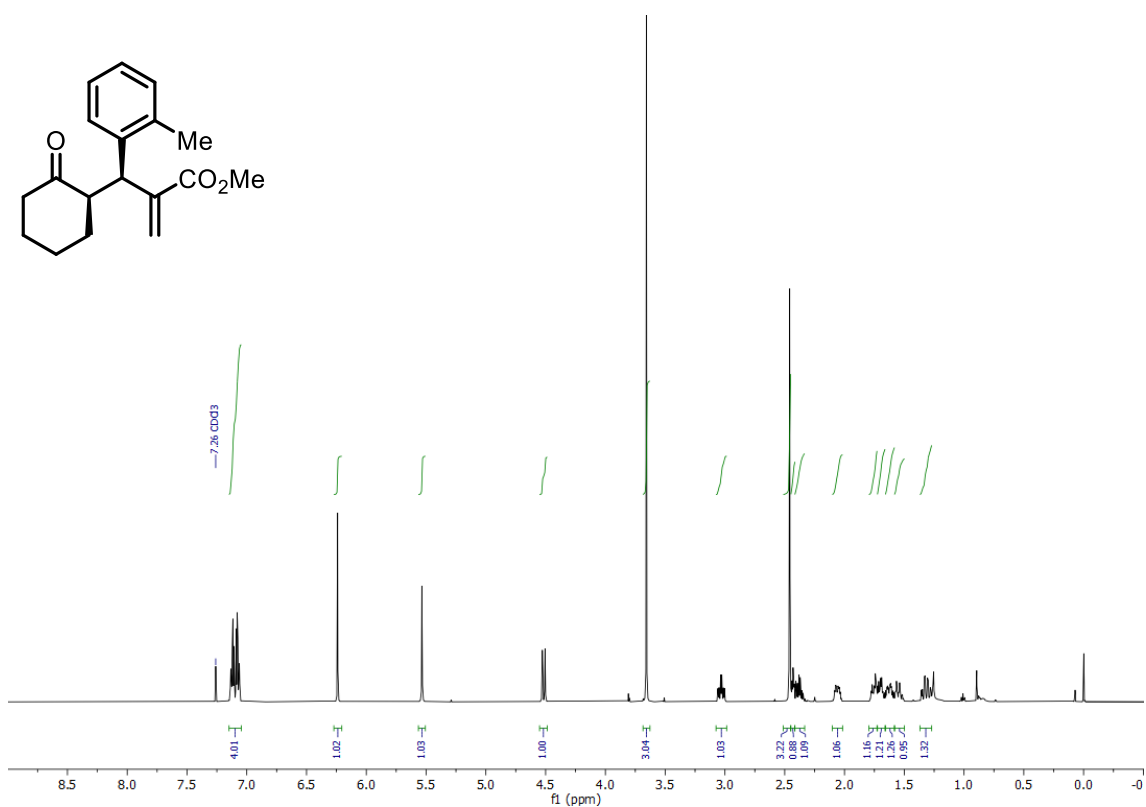

<sup>1</sup>H NMR spectra of **3z**.

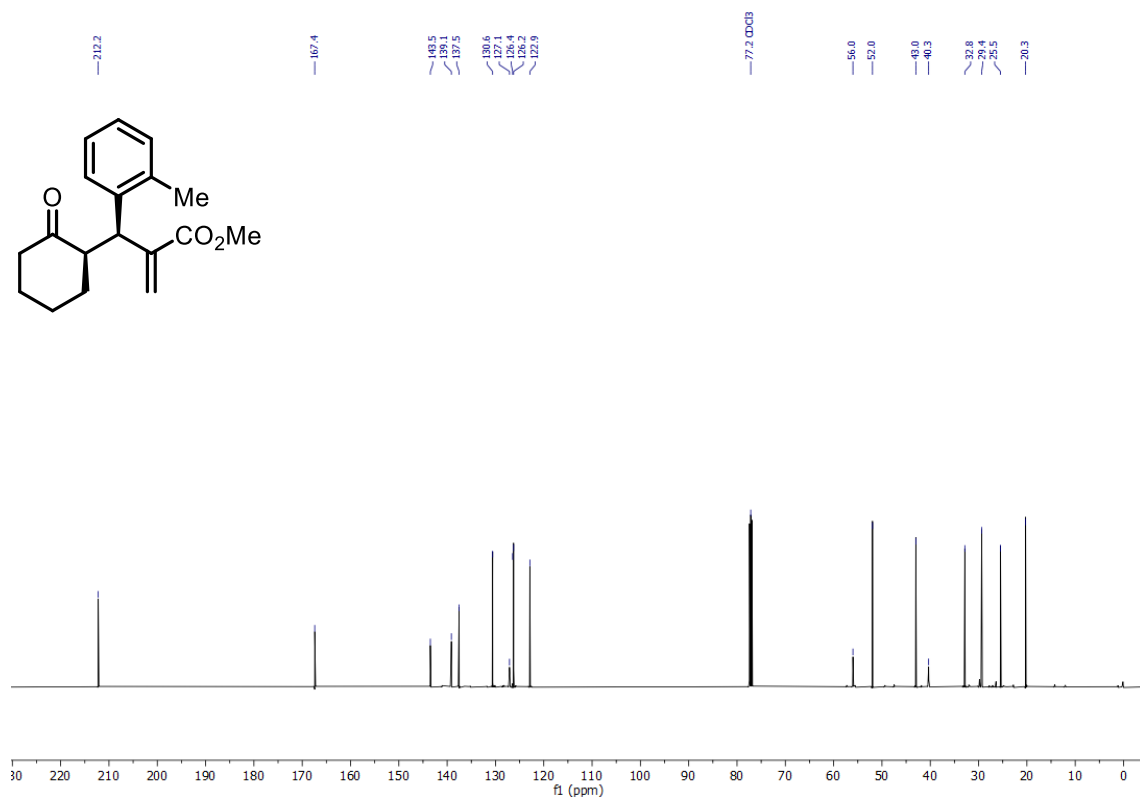

<sup>13</sup>C NMR spectra of **3z**.

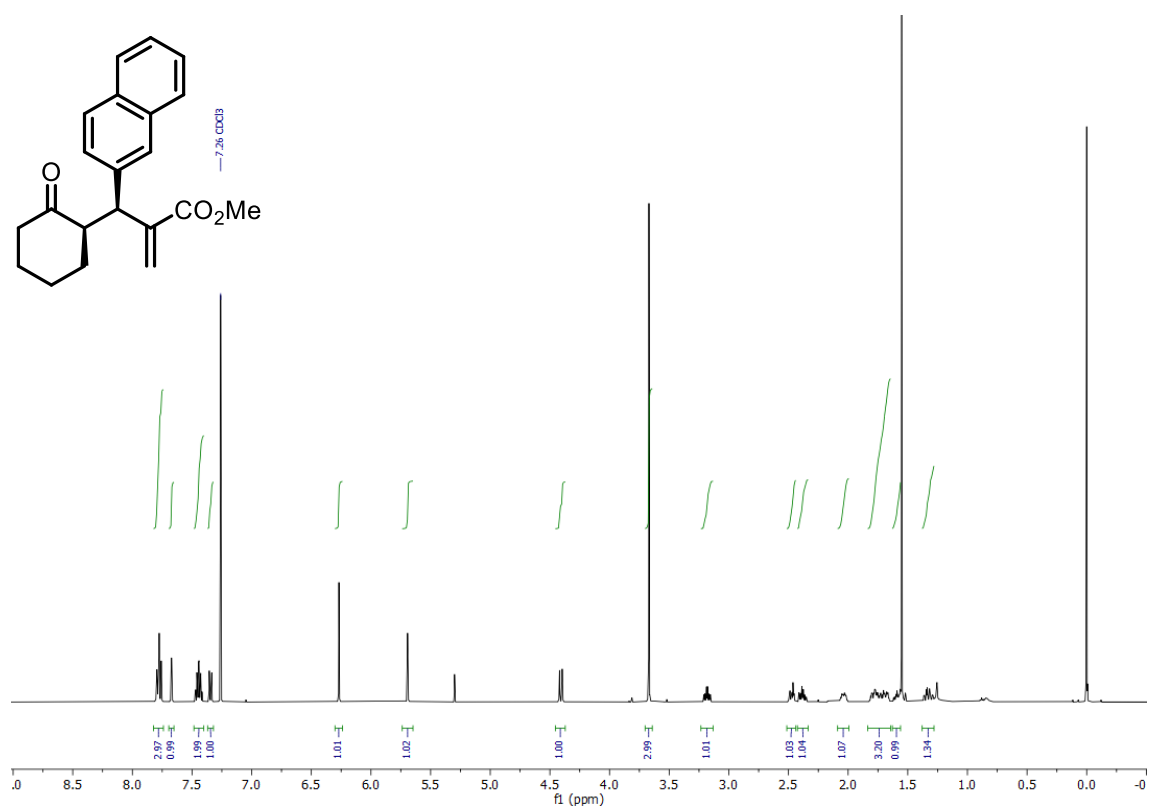

<sup>1</sup>H NMR spectra of **3aa**.

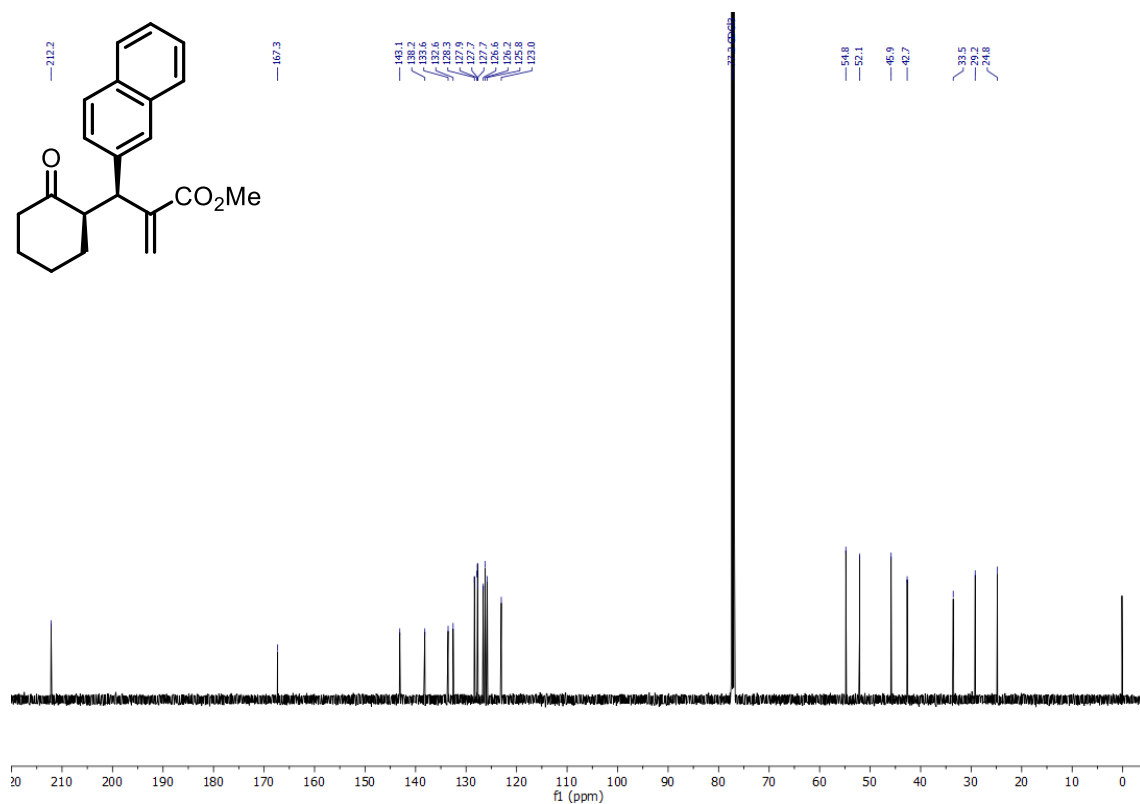

<sup>13</sup>C NMR spectra of **3aa**.

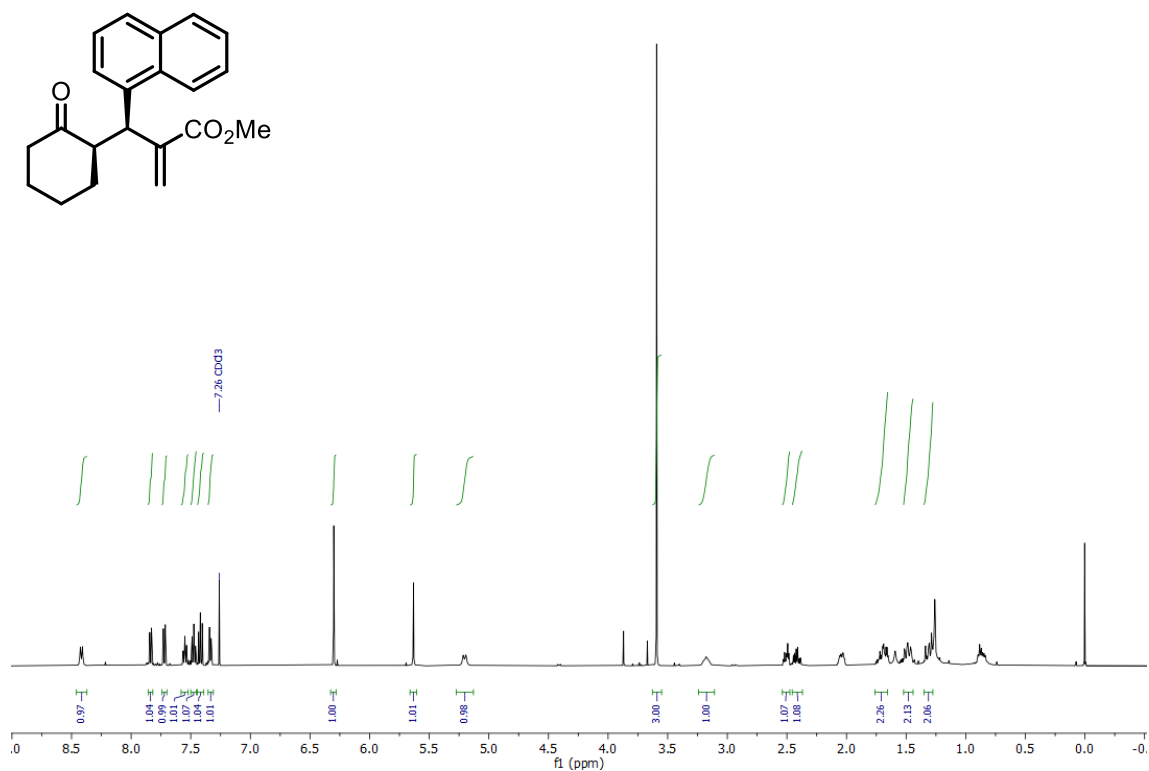

<sup>1</sup>H NMR spectra of **3ab**.

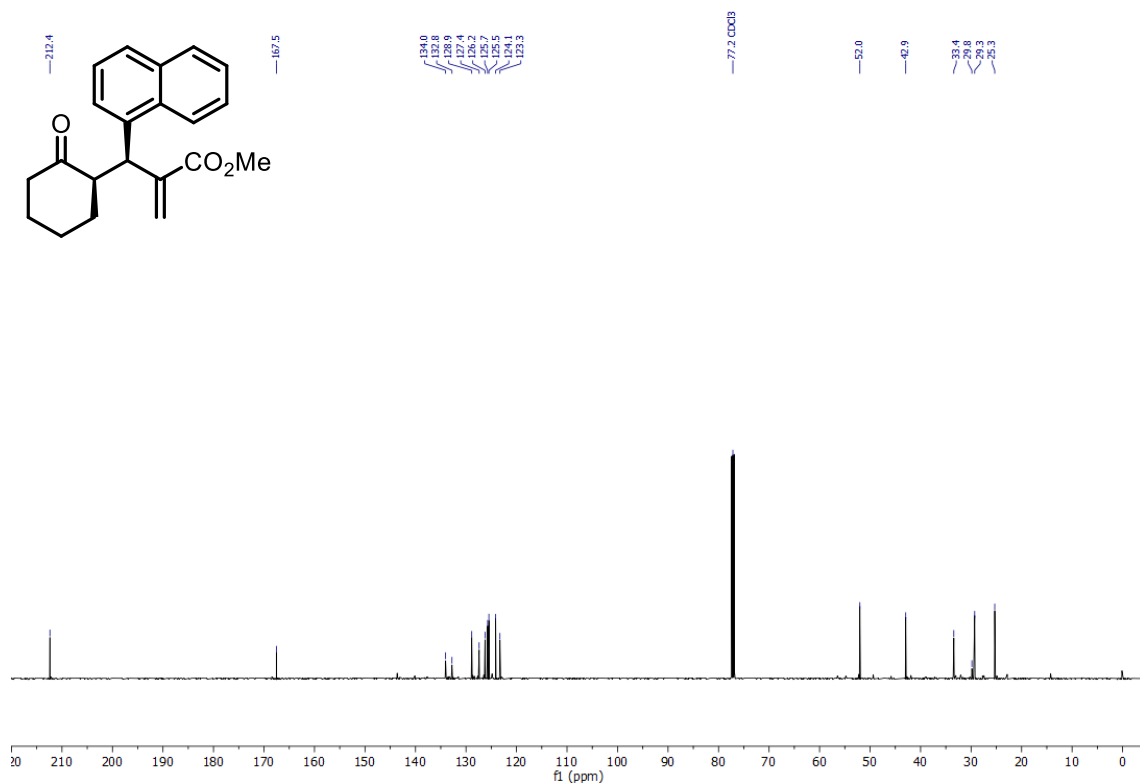

<sup>13</sup>C NMR spectra of **3ab**.

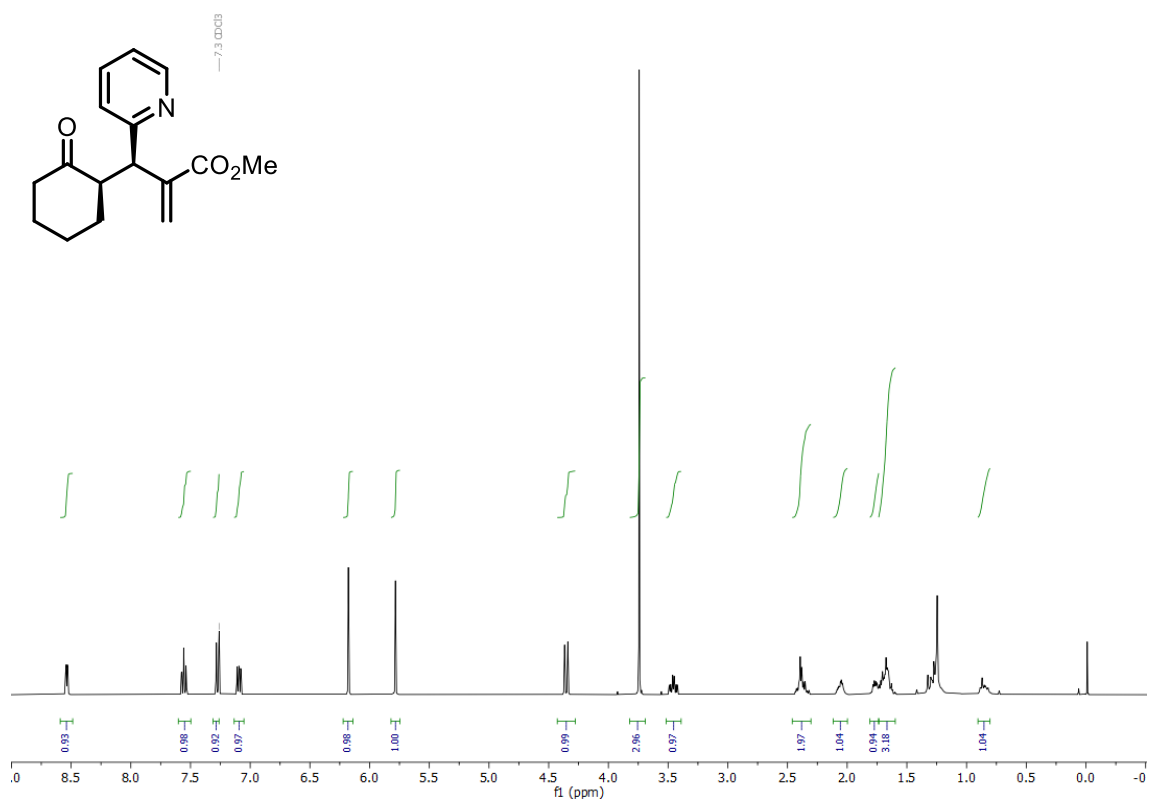

<sup>1</sup>H NMR spectra of **3ac**.

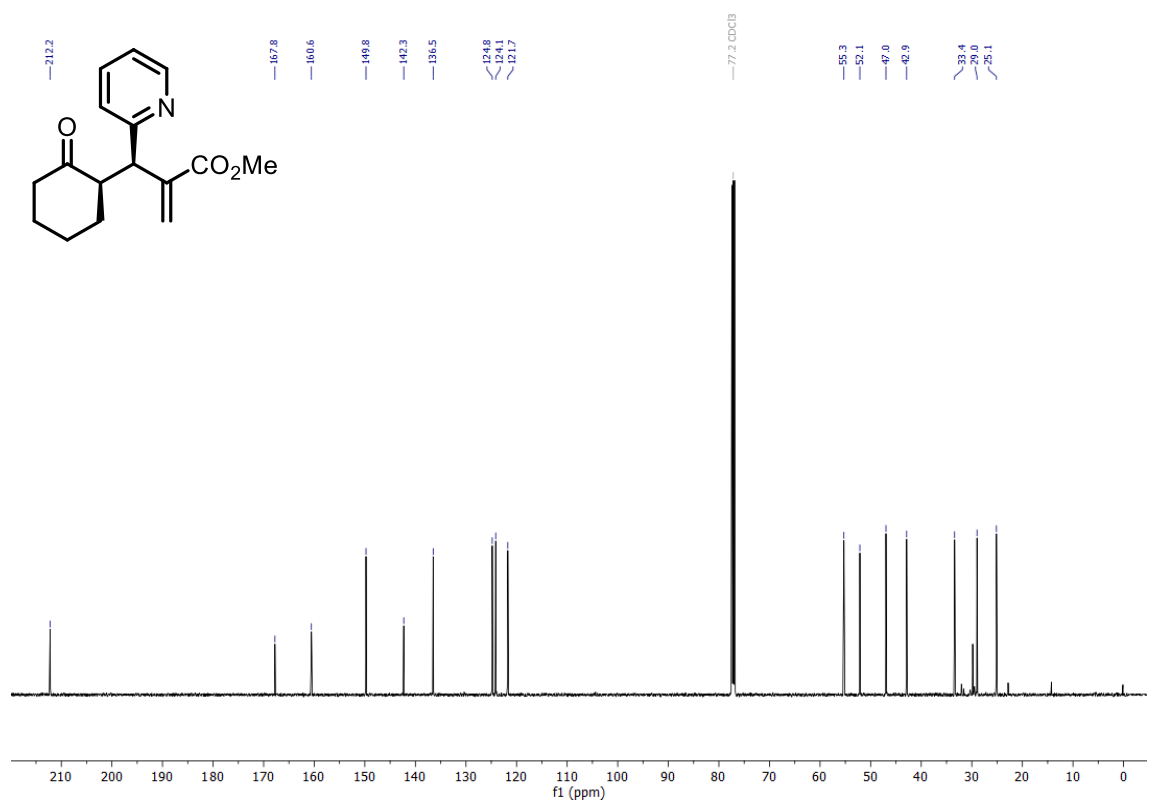

<sup>13</sup>C NMR spectra of **3ac**.

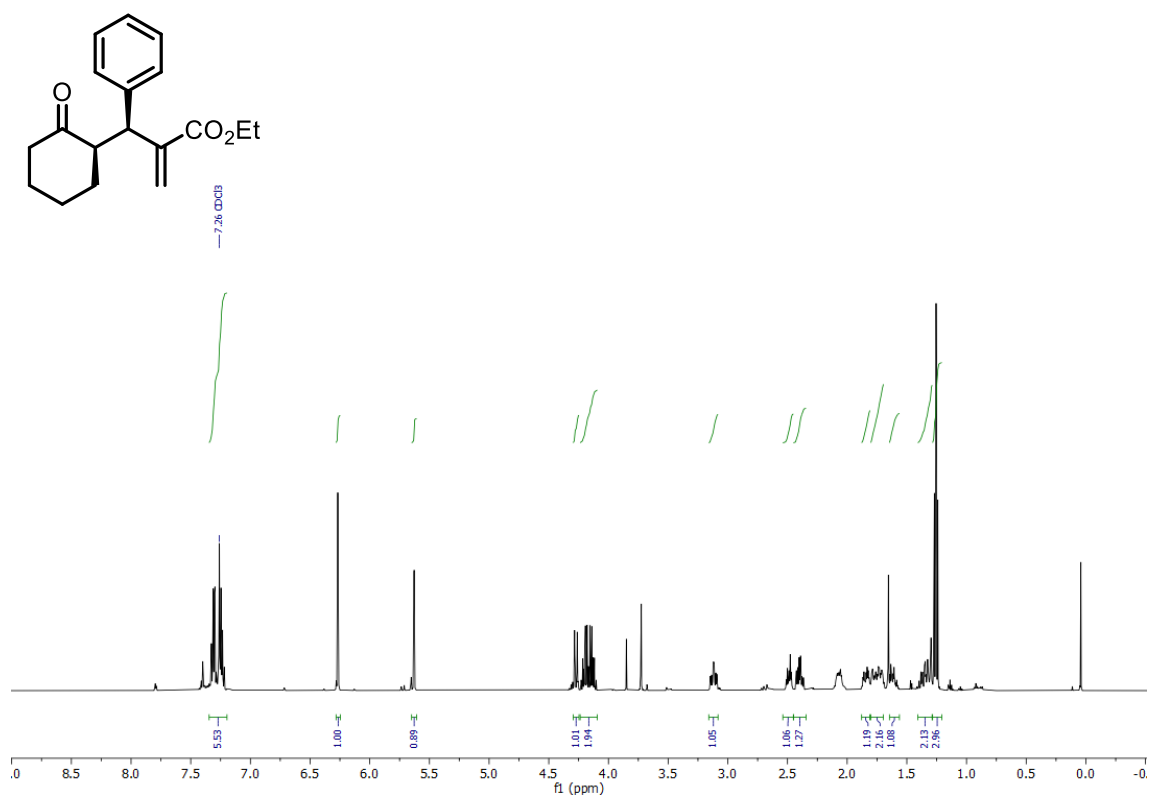

<sup>1</sup>H NMR spectra of **3ad**.

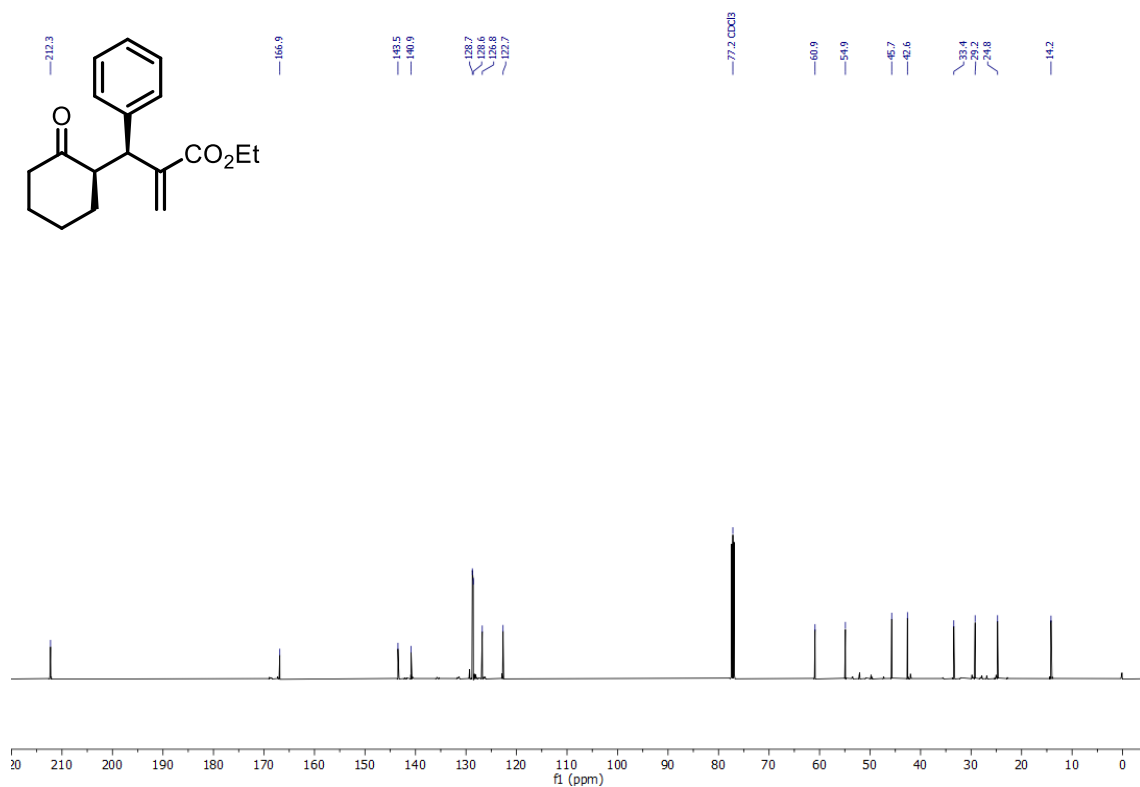

<sup>13</sup>C NMR spectra of **3ad**.

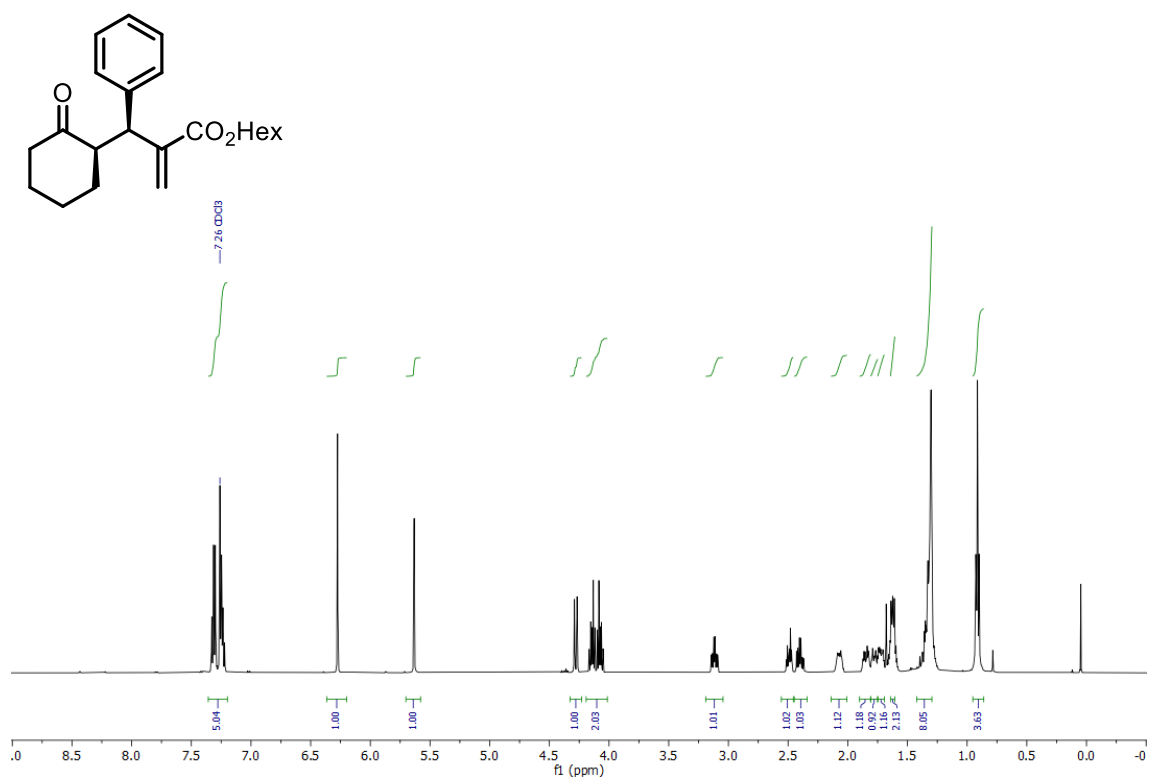

<sup>1</sup>H NMR spectra of **3ae**.

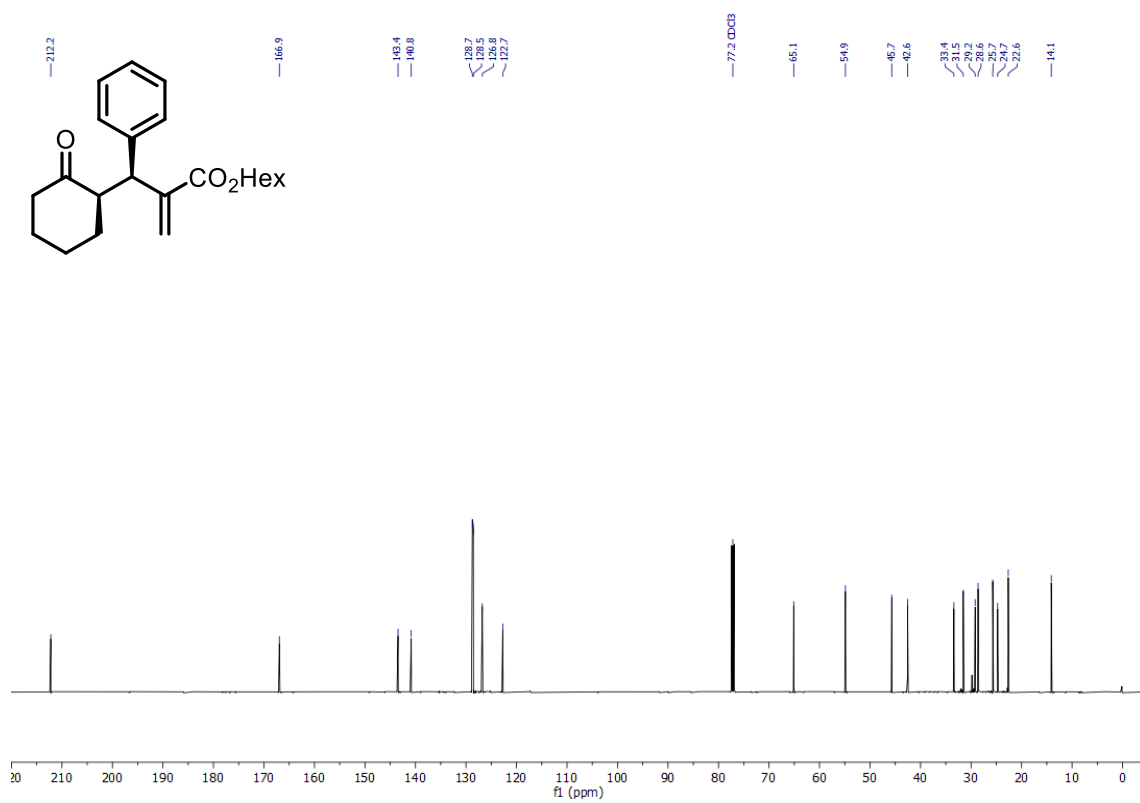

<sup>13</sup>C NMR spectra of **3ae**.

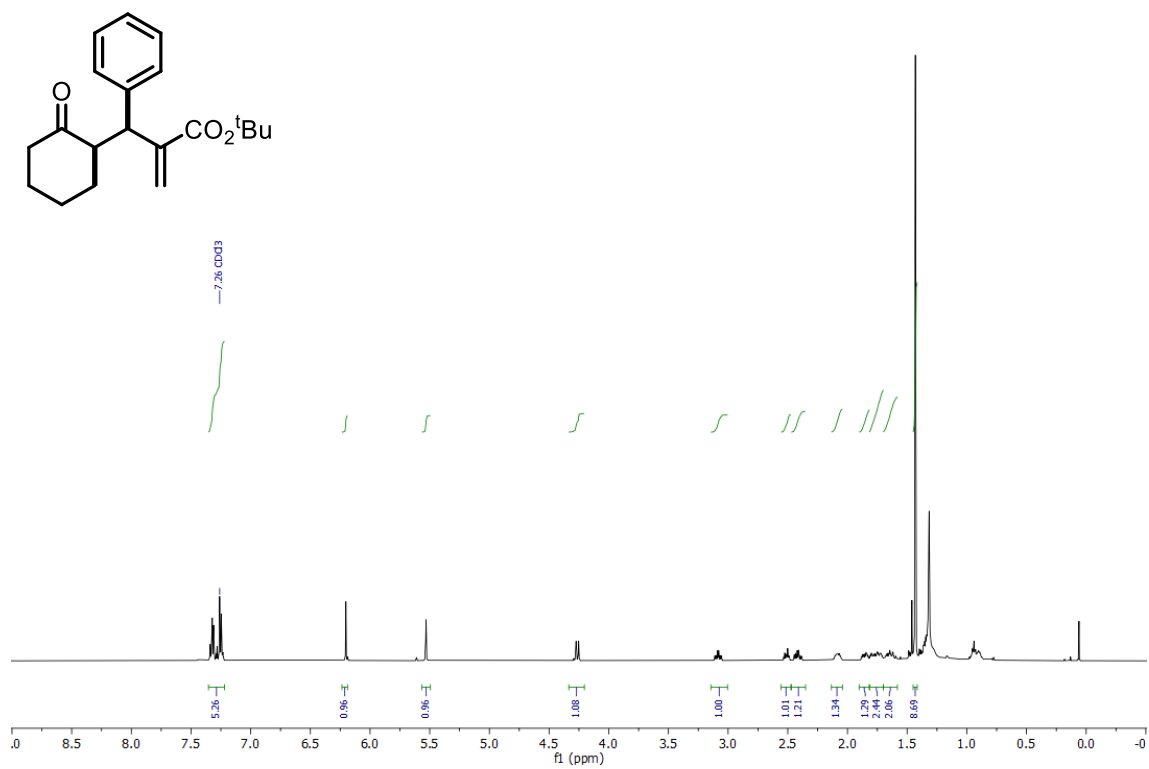

<sup>1</sup>H NMR spectra of **3af**.

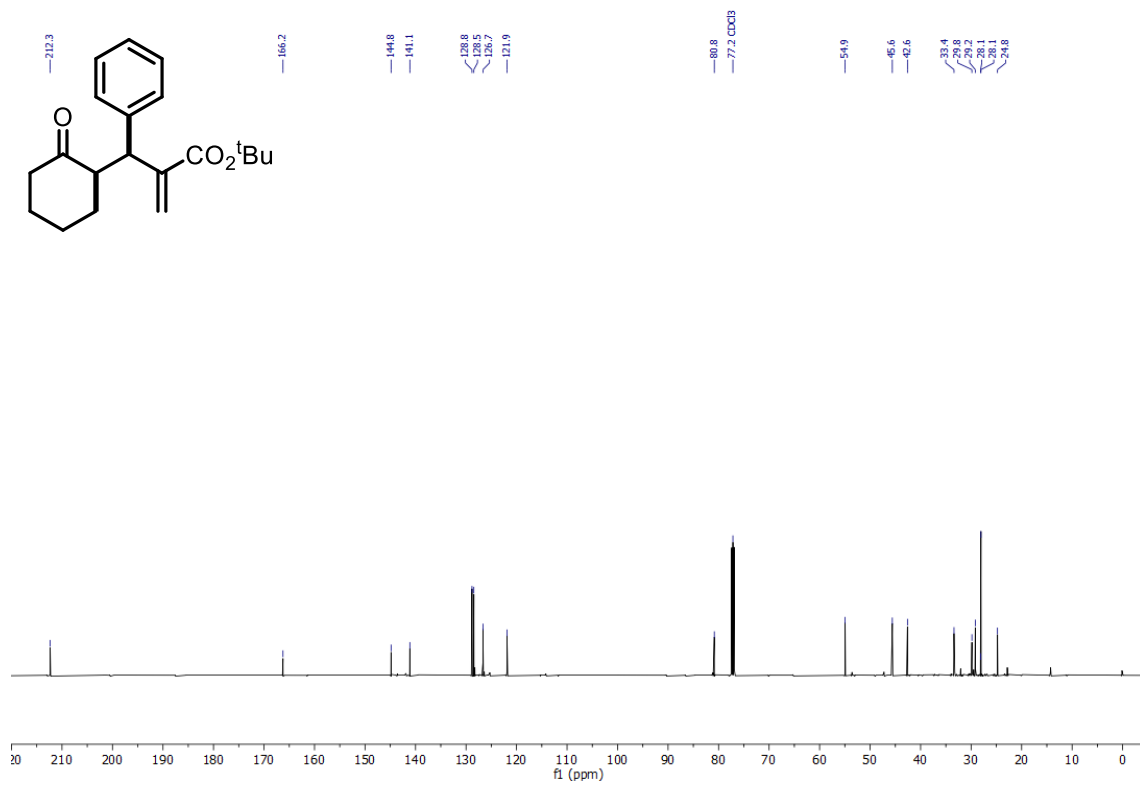

<sup>13</sup>C NMR spectra of **3af**.

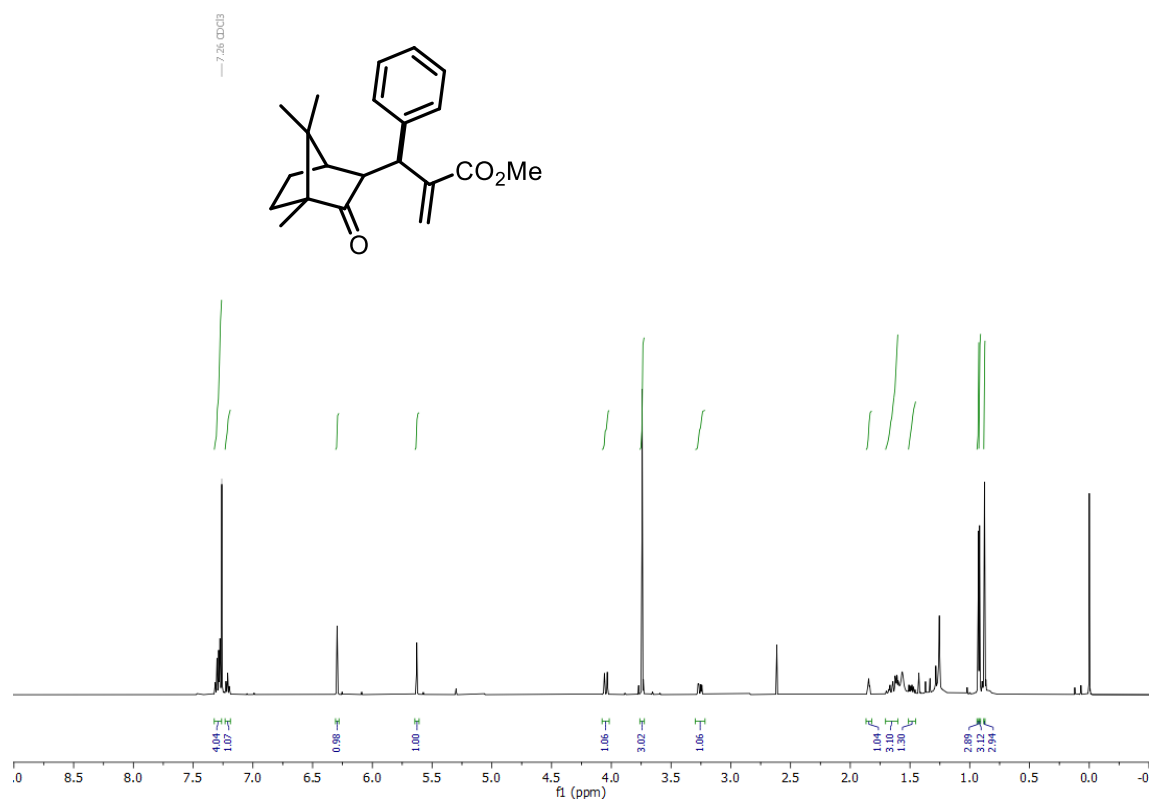

$^1\text{H}$  NMR spectra of **3ag**.

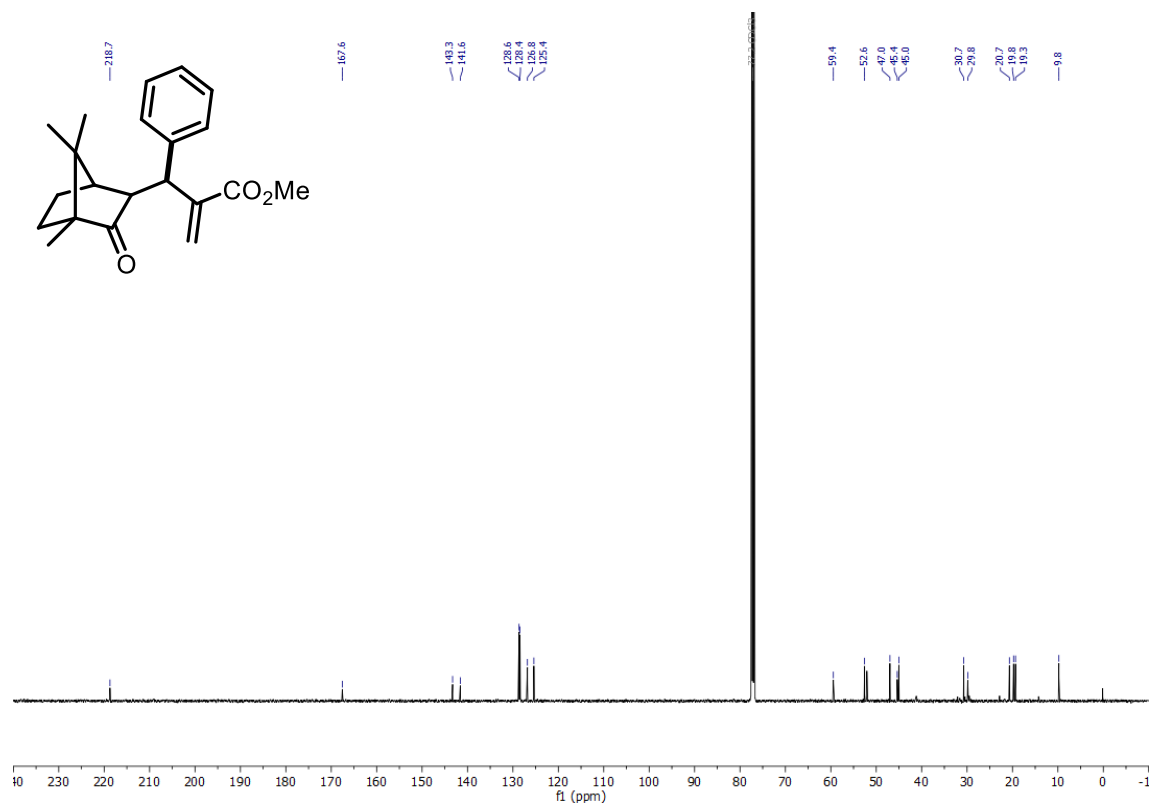

$^{13}\text{C}$  NMR spectra of **3ag**.

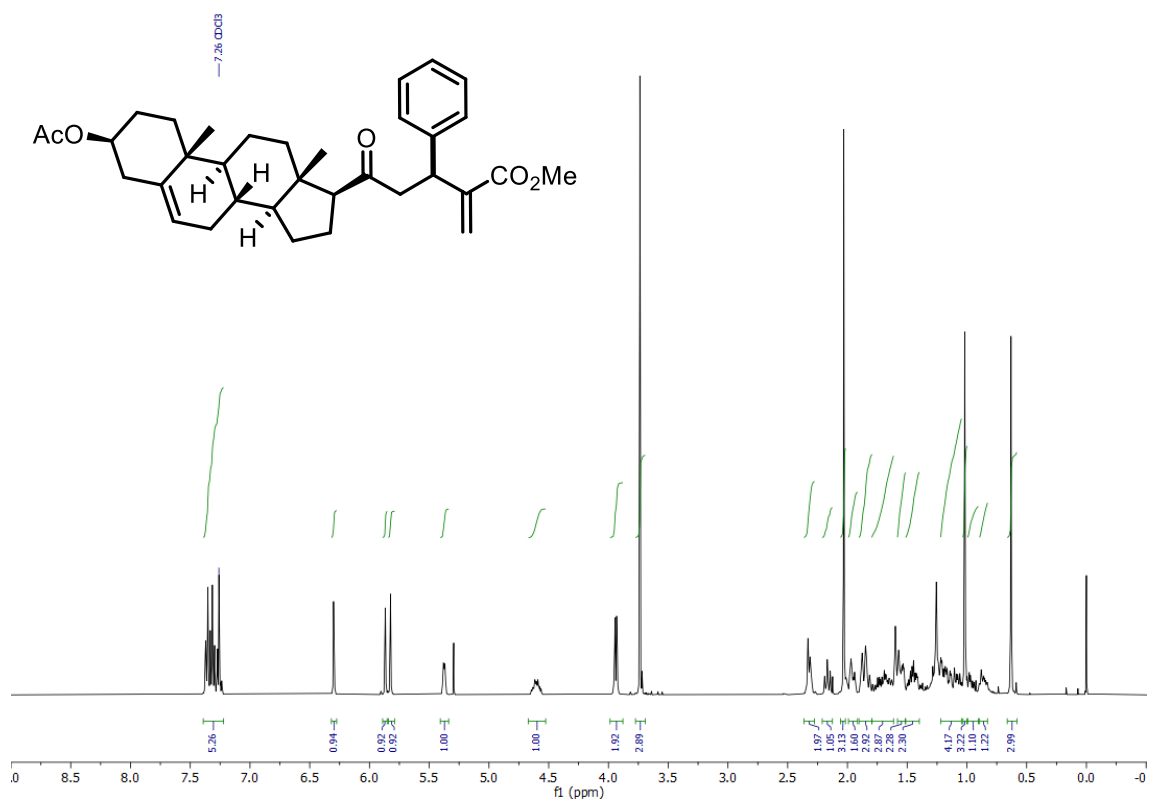

$^1\text{H}$  NMR spectra of **3ah**.

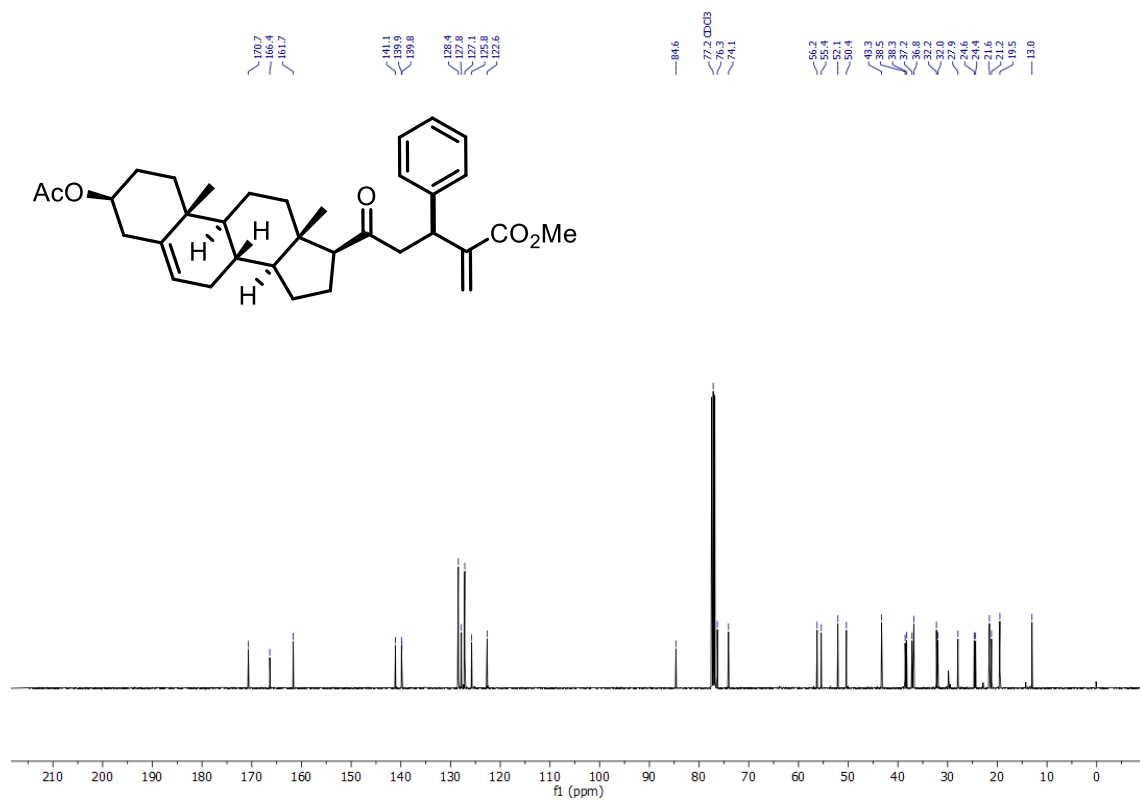

$^{13}\text{C}$  NMR spectra of **3ah**.

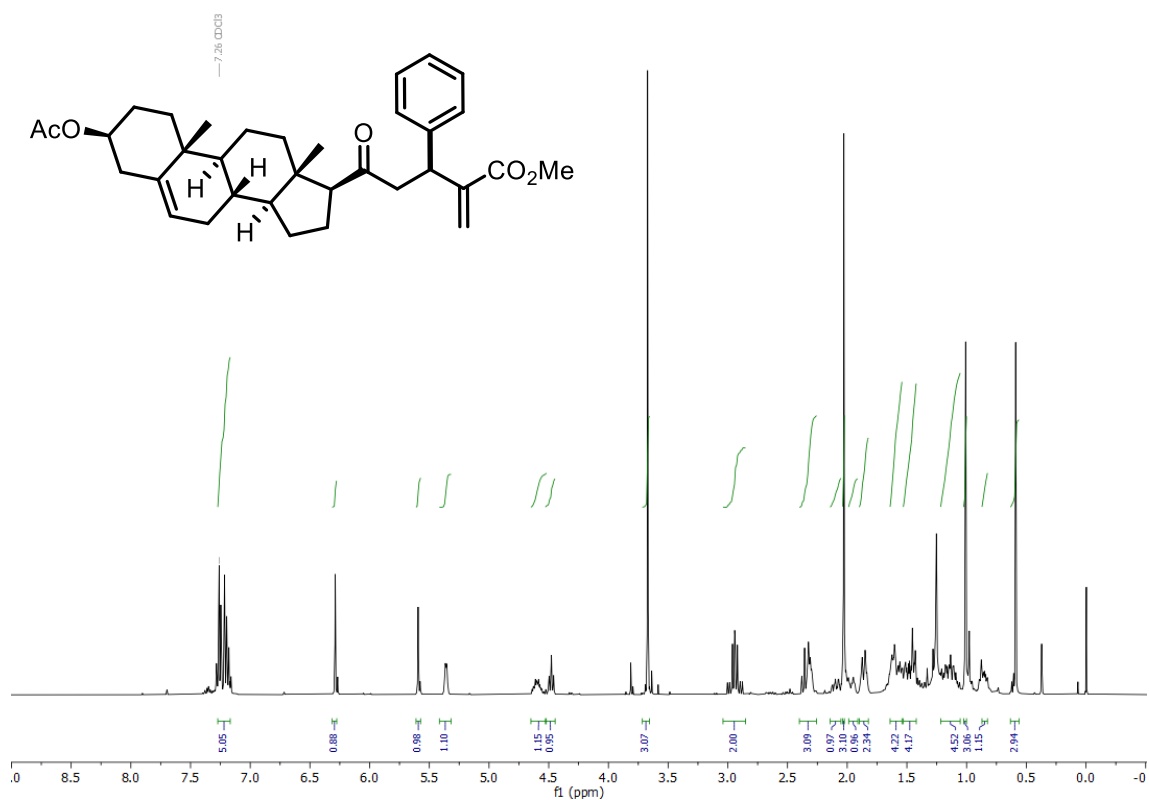

$^1\text{H}$  NMR spectra of **3ah'**.

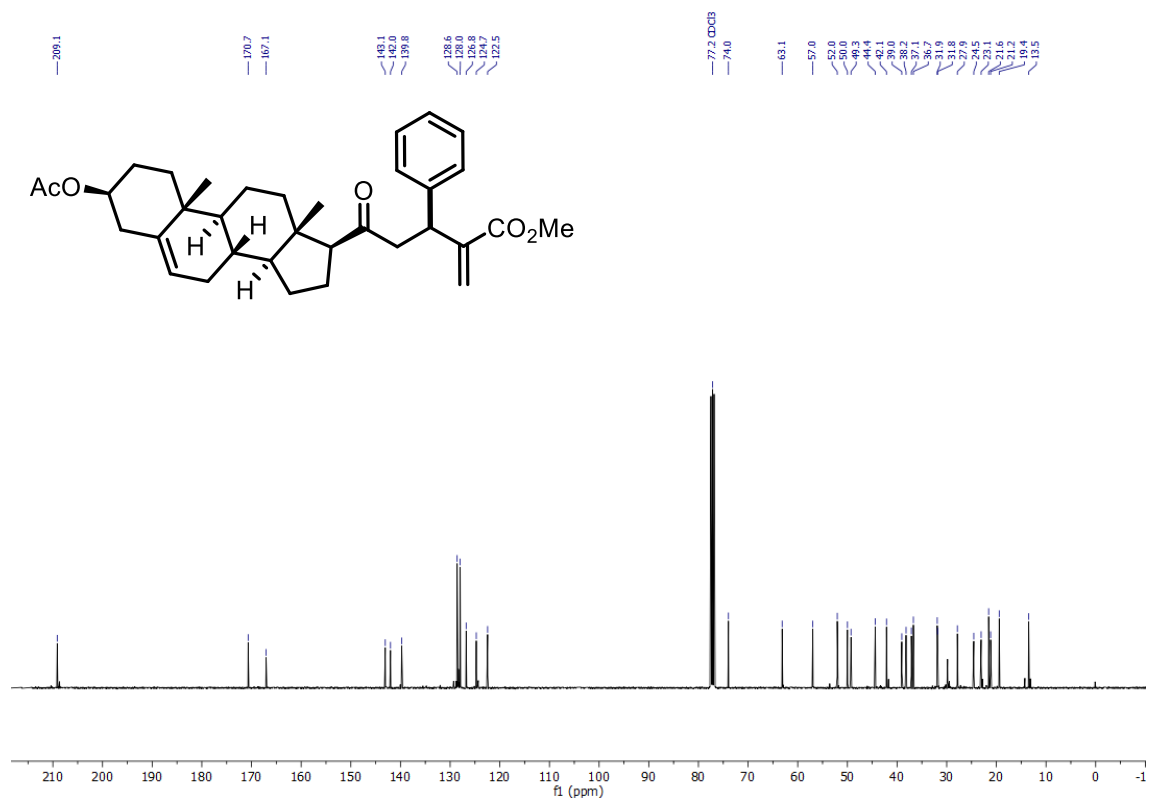

$^{13}\text{C}$  NMR spectra of **3ah'**.

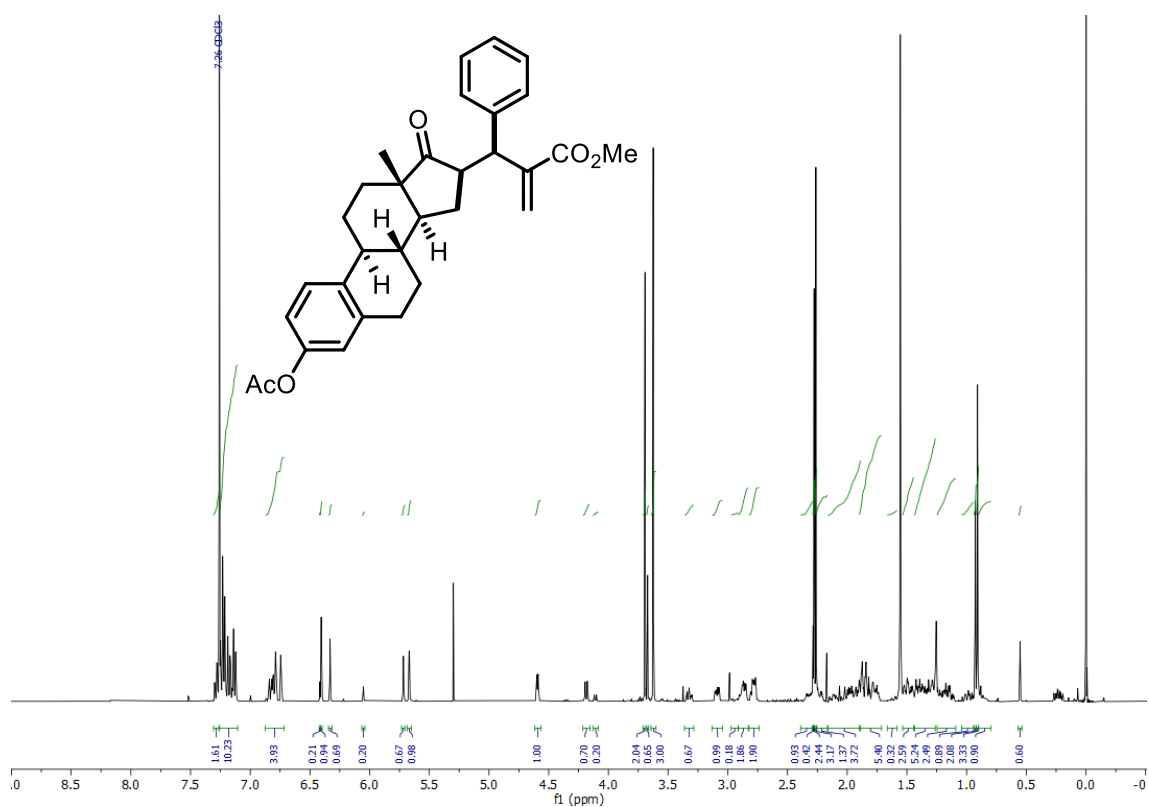

<sup>1</sup>H NMR spectra of **3ai**.

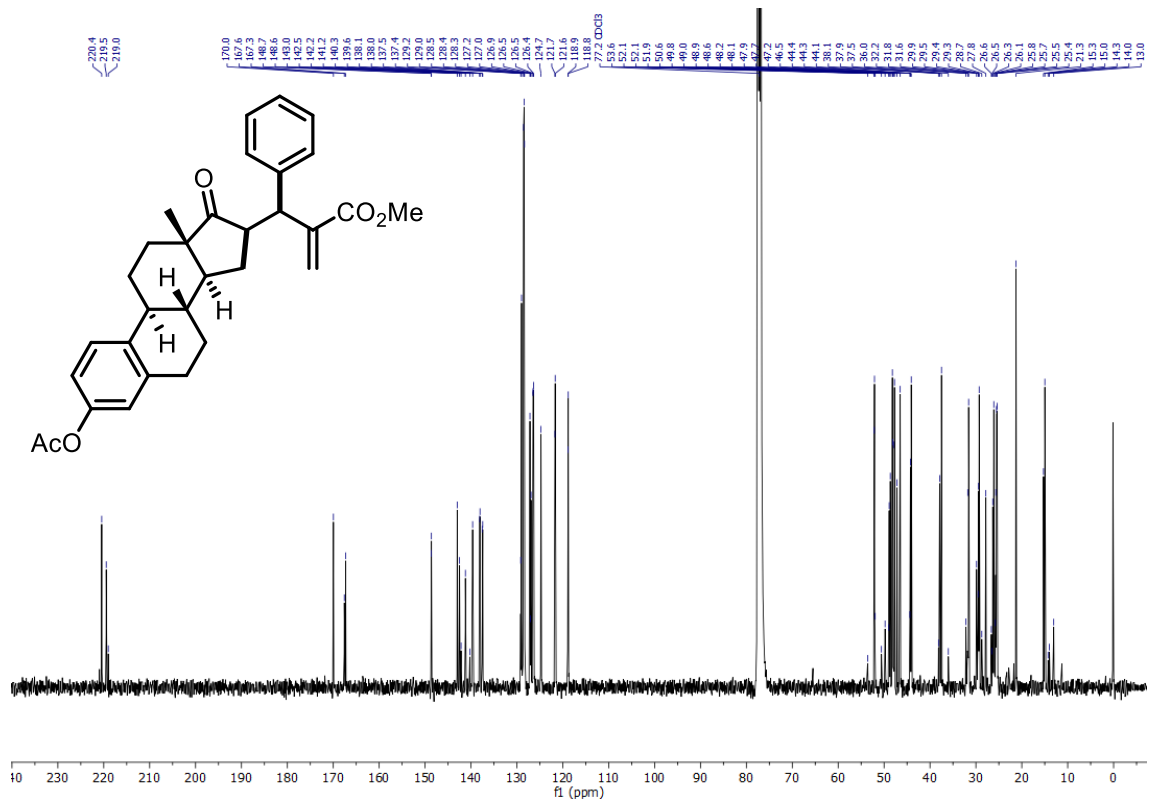

<sup>13</sup>C NMR spectra of **3ai**.

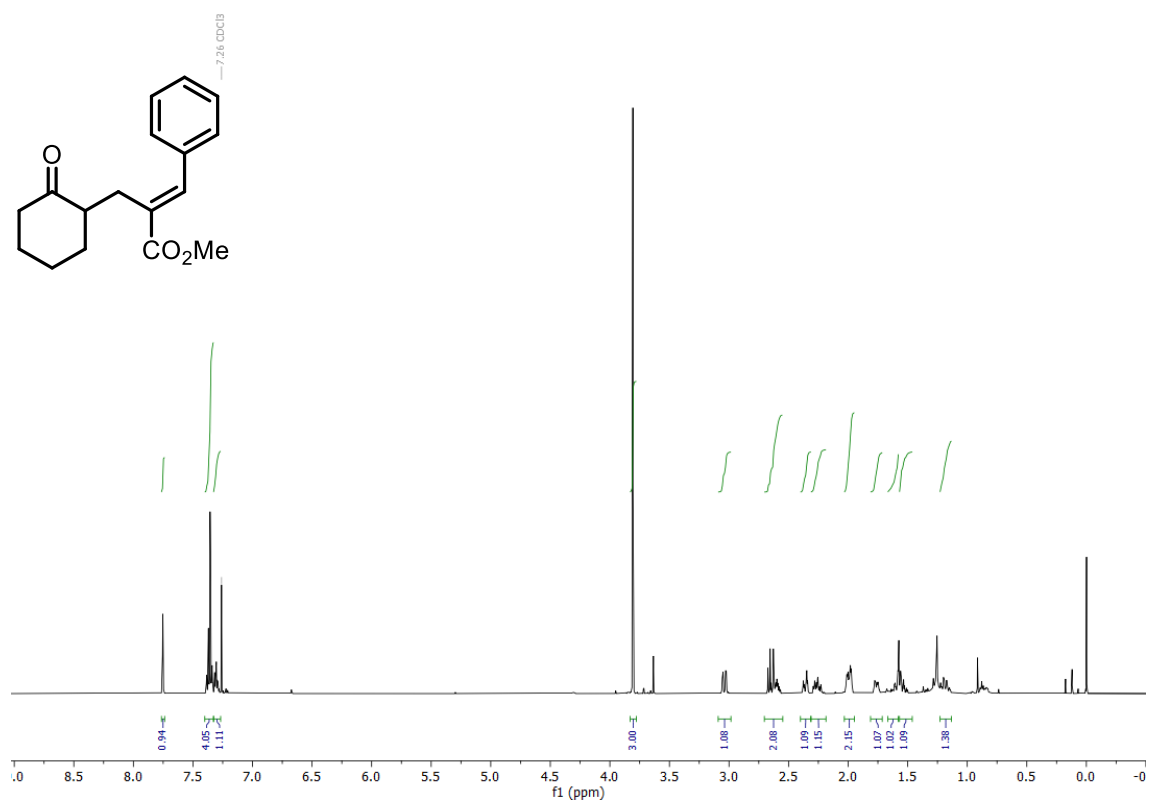

<sup>1</sup>H NMR spectra of **4a**.

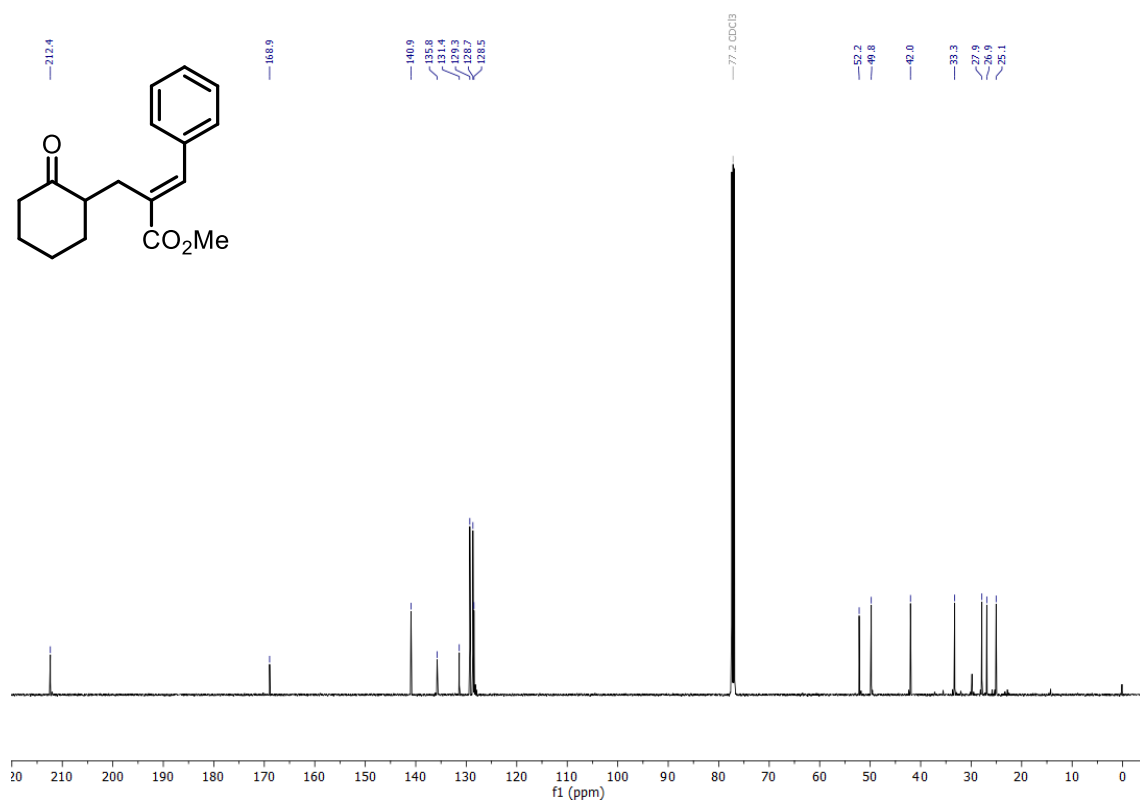

<sup>13</sup>C NMR spectra of **4a**.

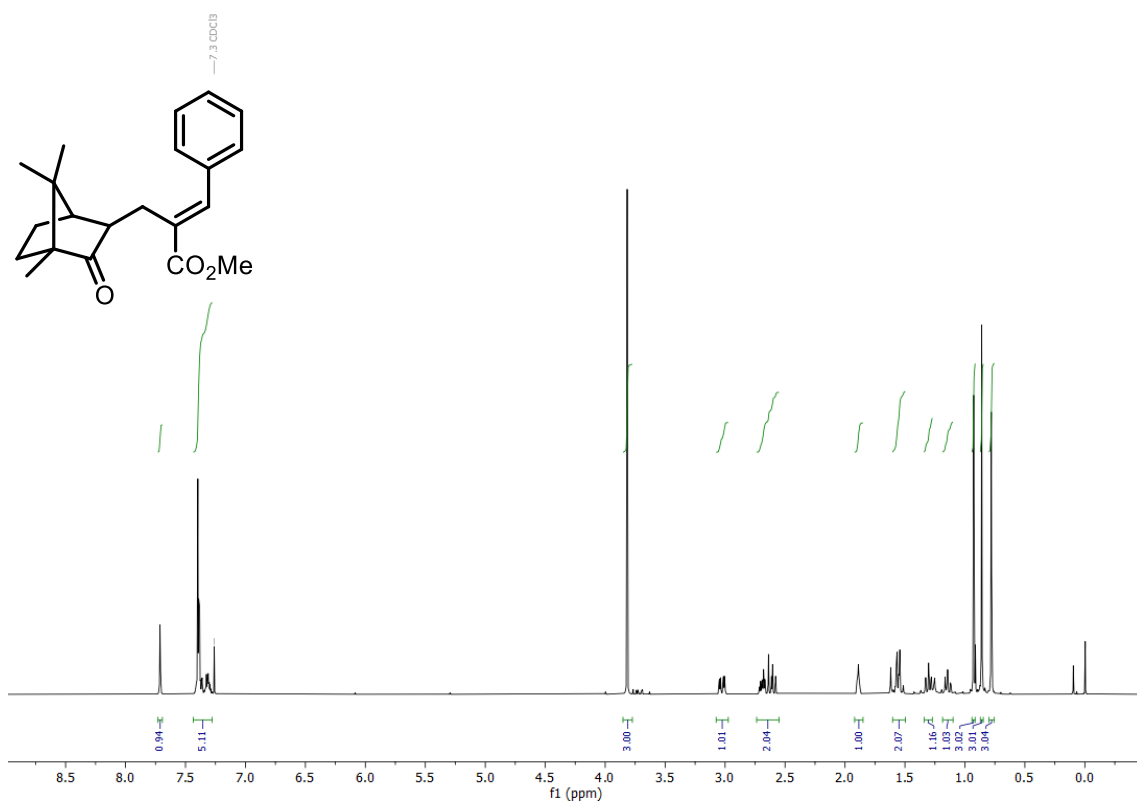

<sup>1</sup>H NMR spectra of **4b**.

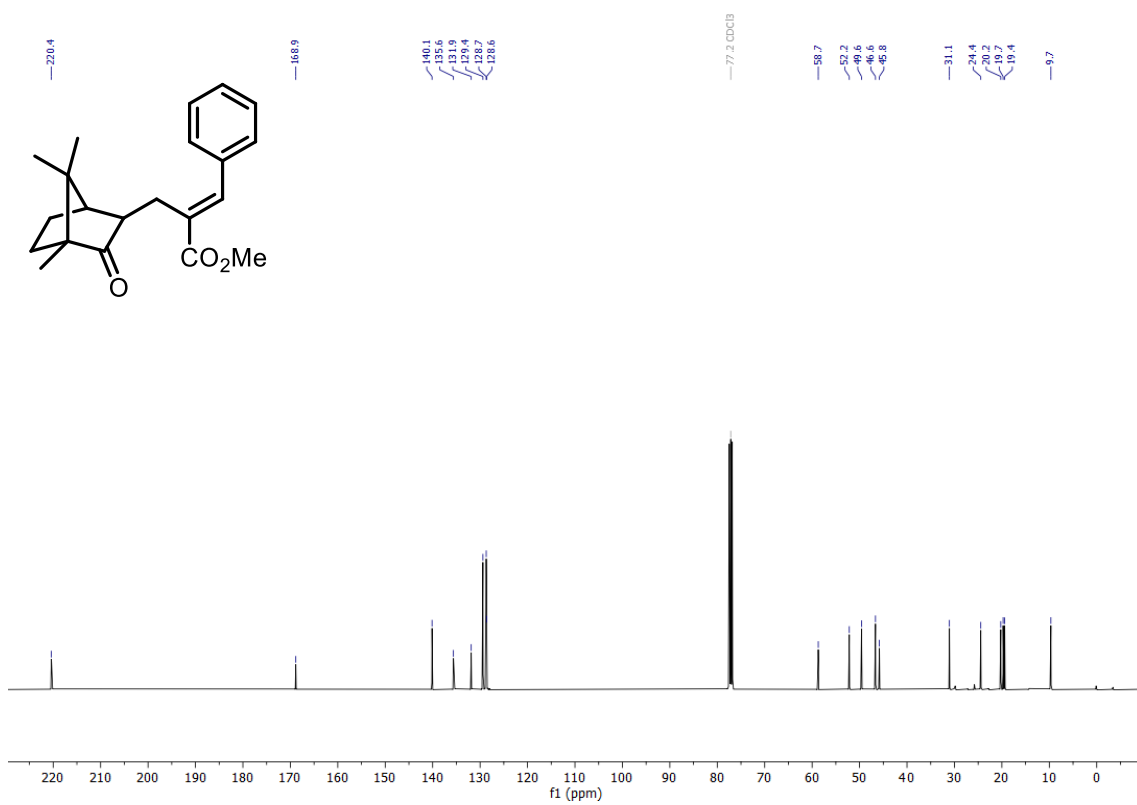

<sup>13</sup>C NMR spectra of **4b**.

## N.5. NMR spectra of derivatization products

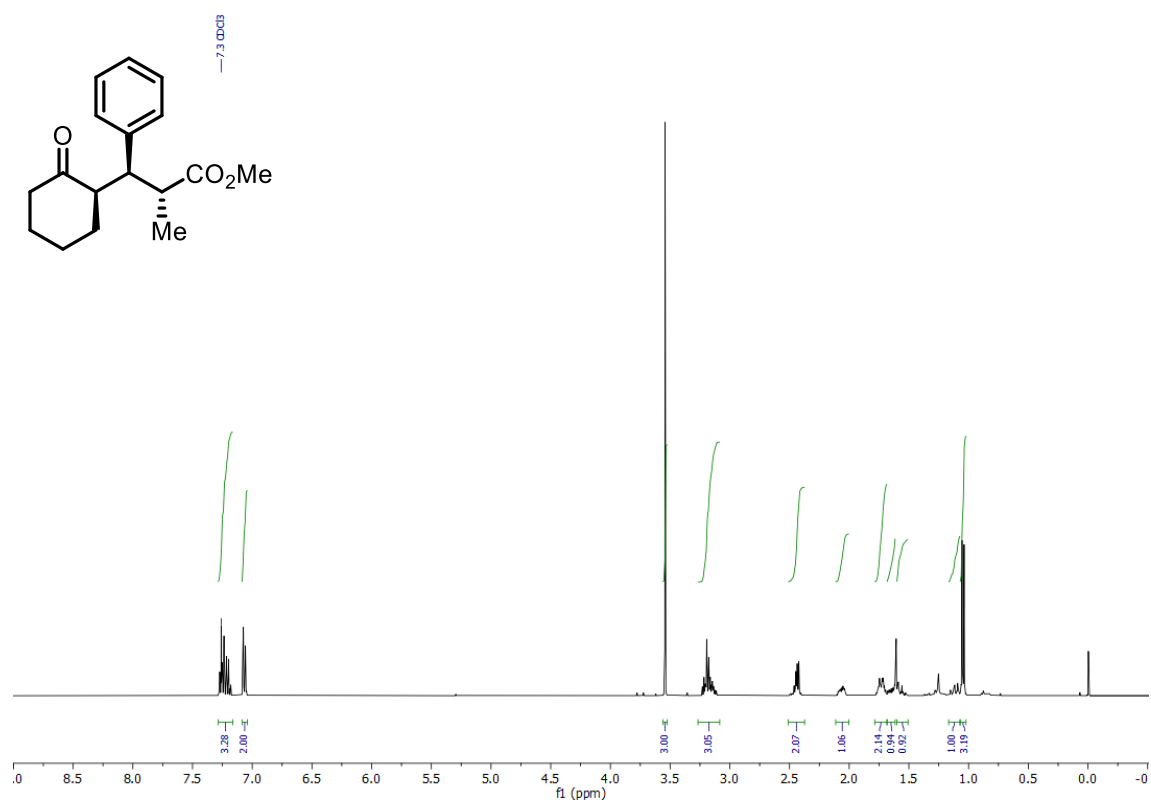

<sup>1</sup>H NMR spectra of **6a**.

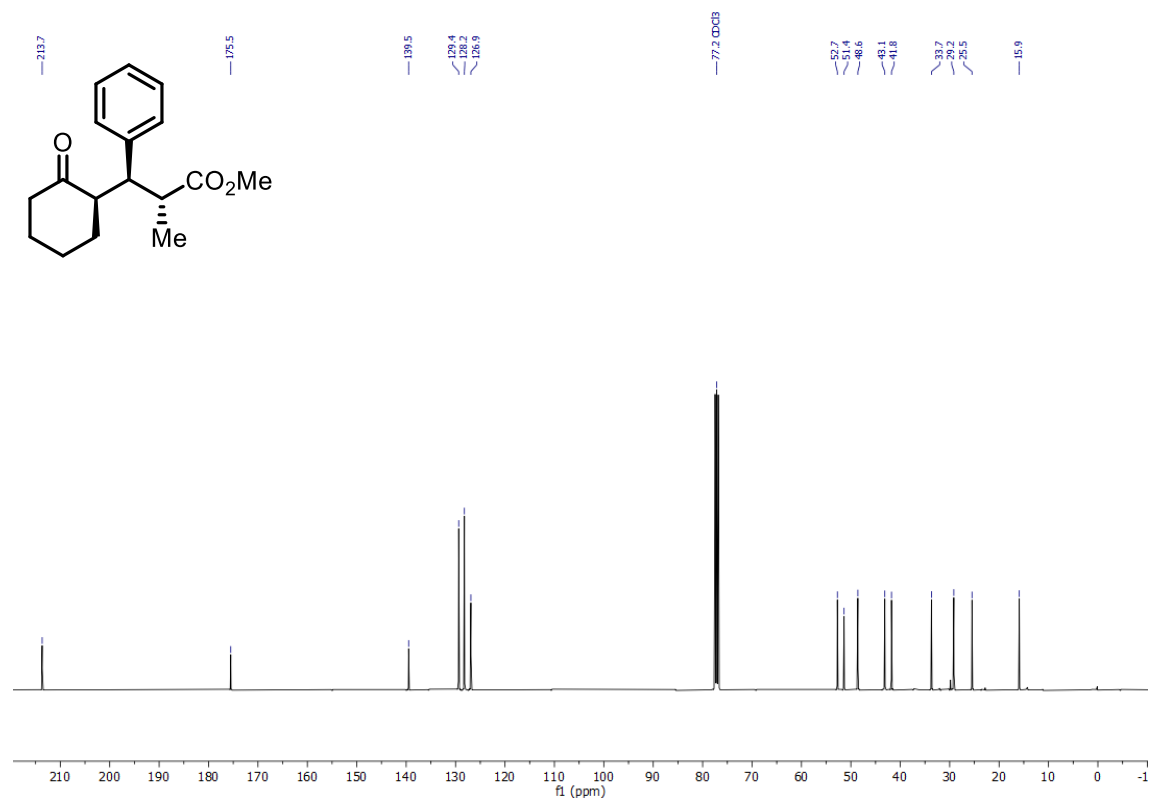

<sup>13</sup>C NMR spectra of **6a**.

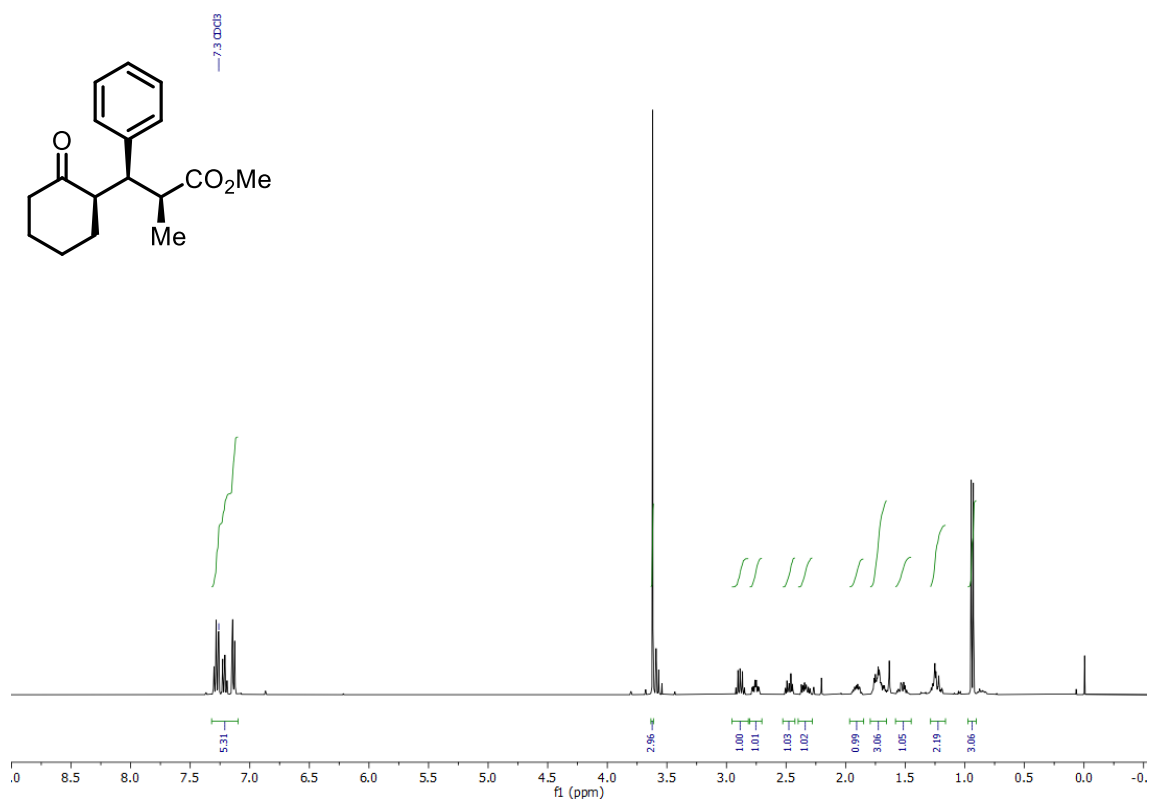

<sup>1</sup>H NMR spectra of **6b**.

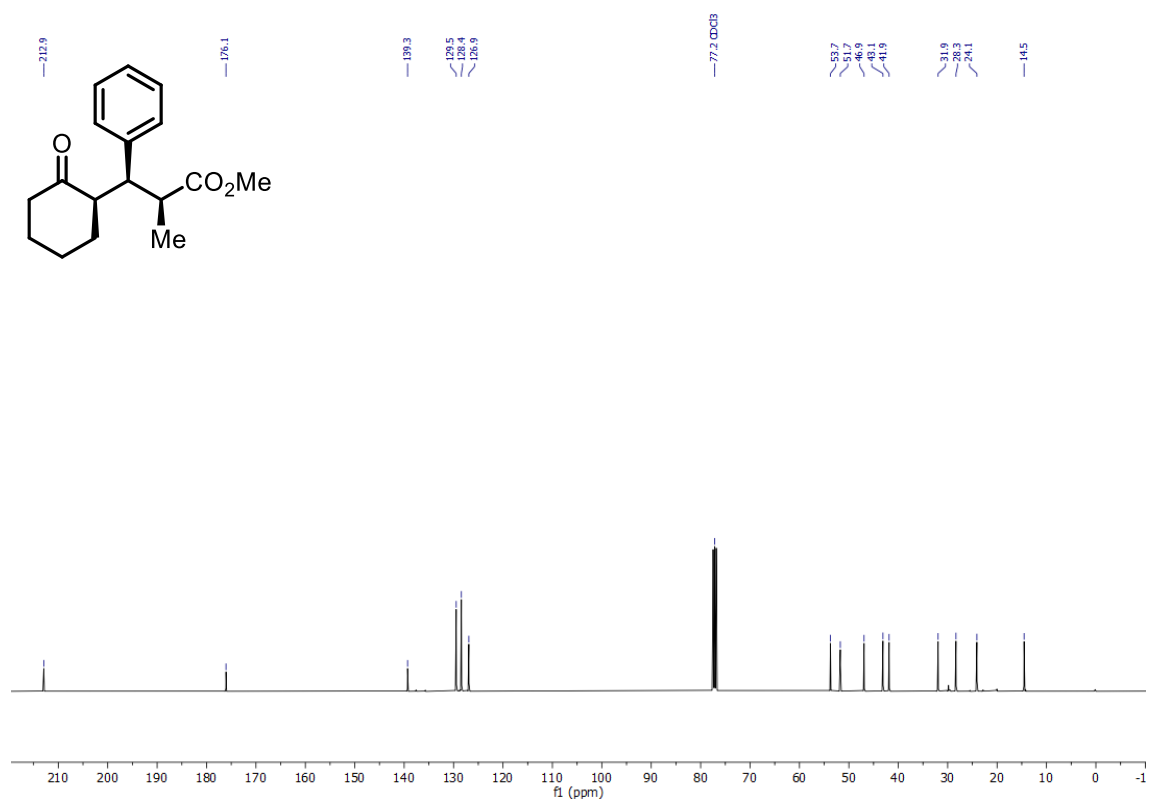

<sup>13</sup>C NMR spectra of **6b**.

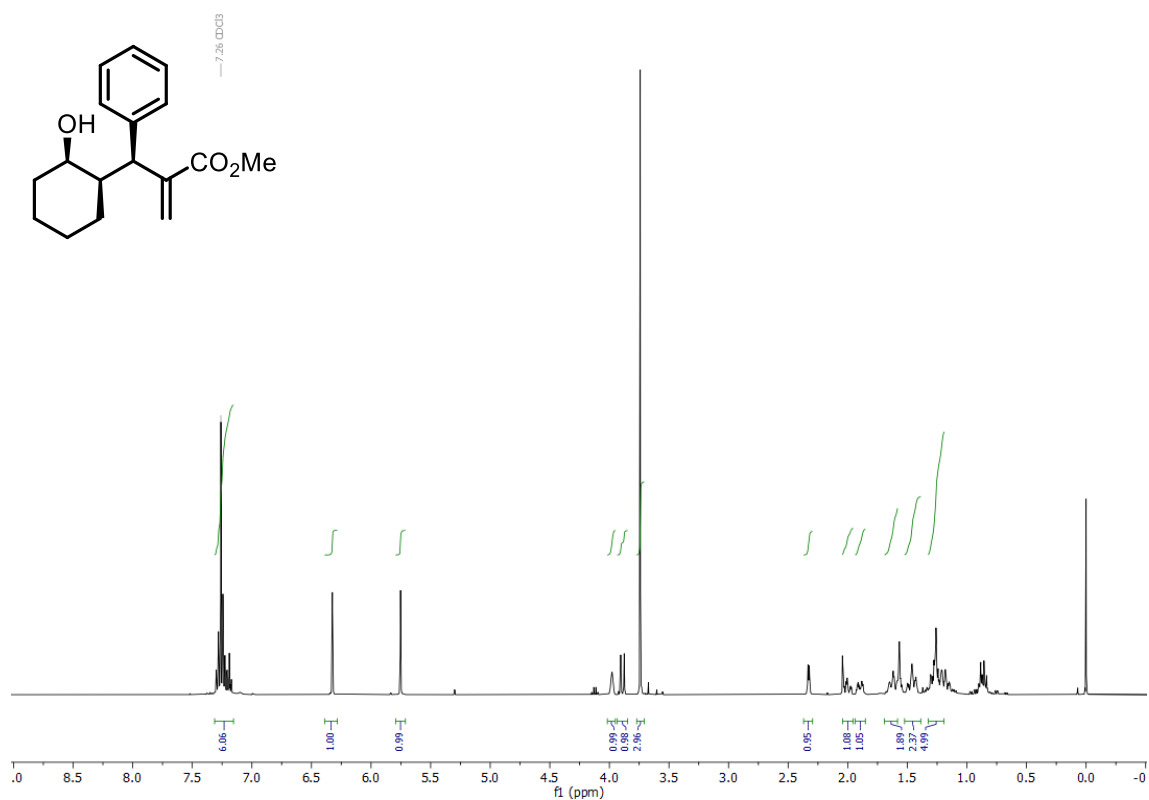

<sup>1</sup>H NMR spectra of **8**.

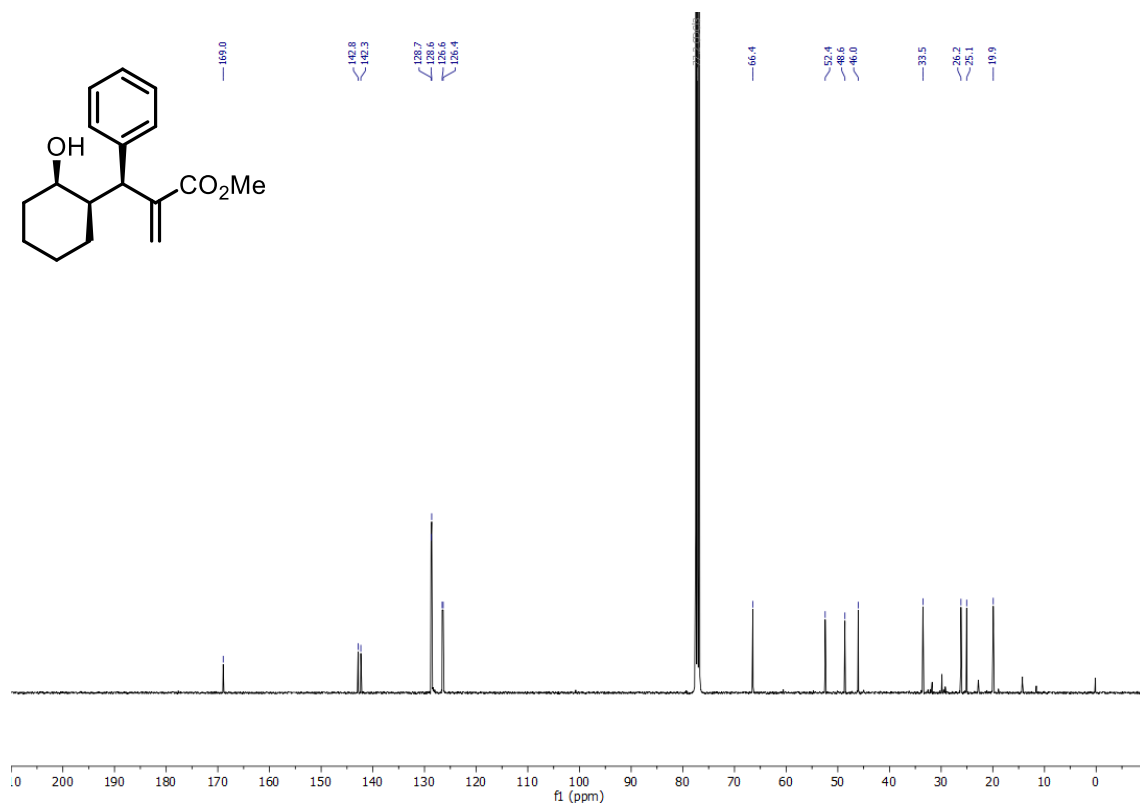

<sup>13</sup>C NMR spectra of **8**.

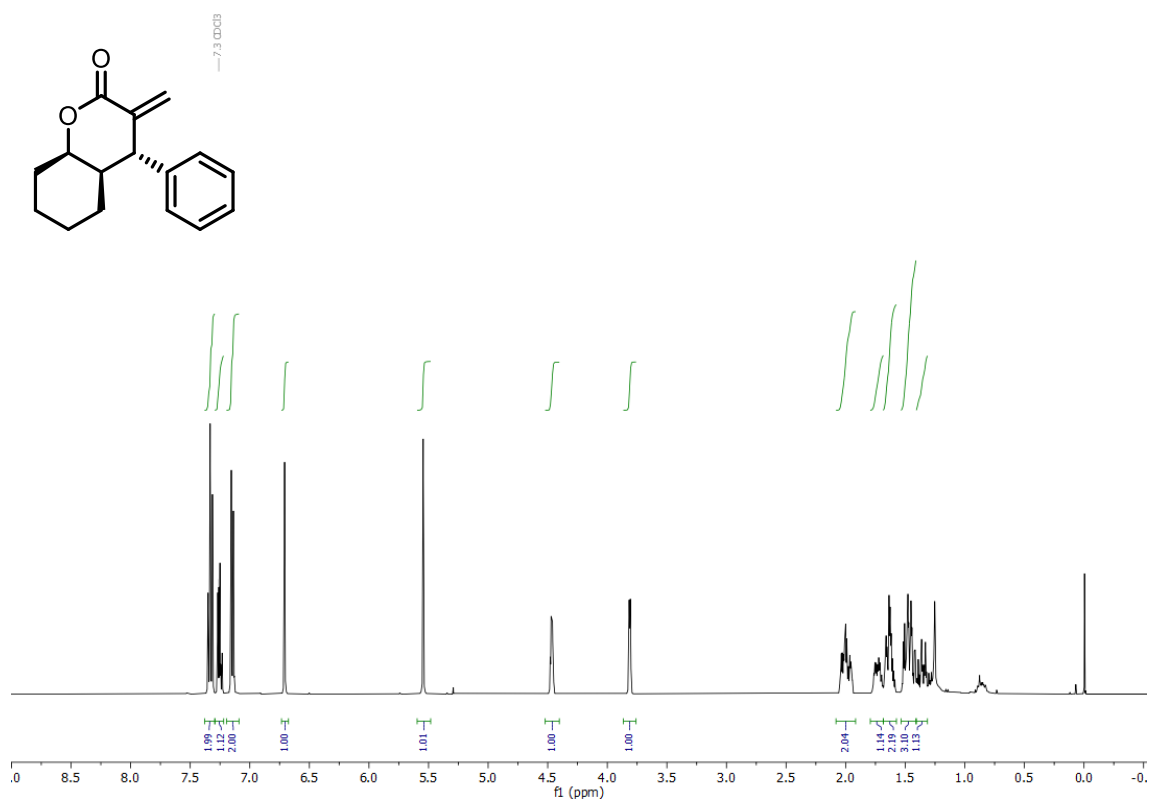

$^1\text{H}$  NMR spectra of **7**.

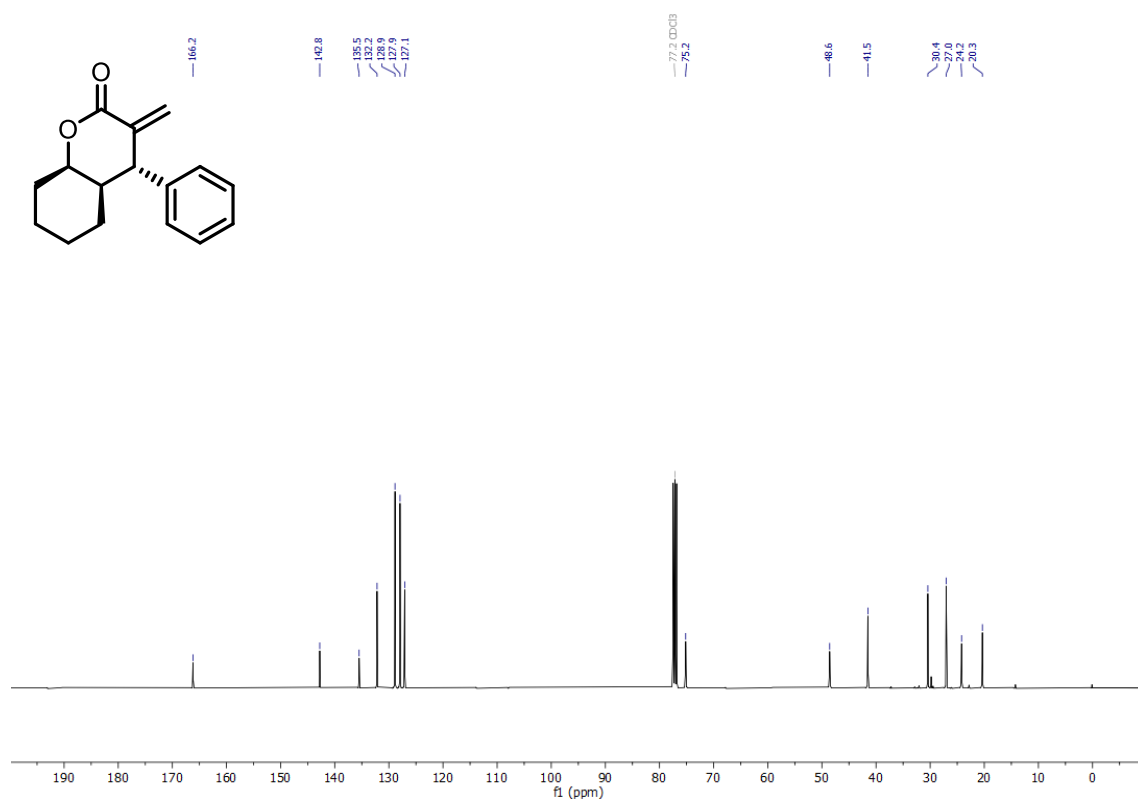

$^{13}\text{C}$  NMR spectra of **7**.

## O. Chiral HPLC Chromatograms

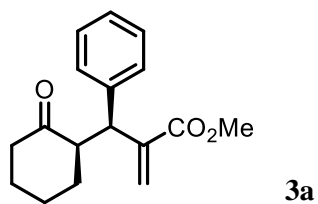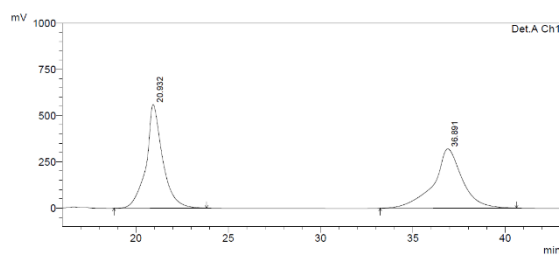

1 Det.A Ch1/218nm

PeakTable

| Peak# | Ret. Time | Area     | Height | Area %  | Height % |
|-------|-----------|----------|--------|---------|----------|
| 1     | 20.832    | 34856338 | 560780 | 50.264  | 63.623   |
| 2     | 38.881    | 34499601 | 320637 | 49.736  | 36.377   |
| Total |           | 69347139 | 881418 | 100.000 | 100.000  |

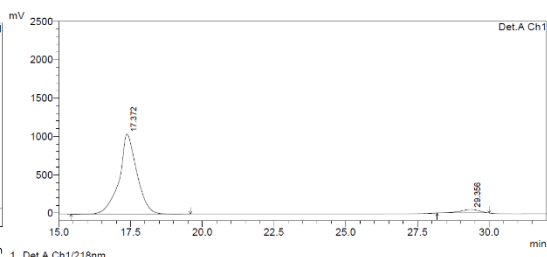

1 Det.A Ch1/218nm

PeakTable

| Peak# | Ret. Time | Area     | Height  | Area %  | Height % |
|-------|-----------|----------|---------|---------|----------|
| 1     | 17.372    | 44704191 | 1042631 | 95.349  | 95.726   |
| 2     | 29.356    | 2180645  | 46546   | 4.651   | 4.274    |
| Total |           | 46884837 | 1089177 | 100.000 | 100.000  |

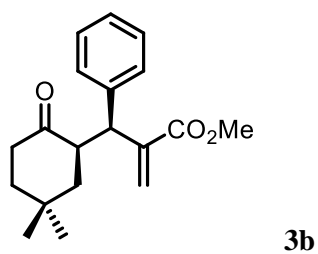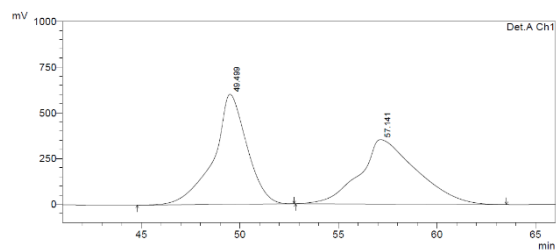

1 Det.A Ch1/218nm

PeakTable

| Peak# | Ret. Time | Area      | Height | Area %  | Height % |
|-------|-----------|-----------|--------|---------|----------|
| 1     | 49.499    | 70428479  | 601238 | 49.940  | 63.075   |
| 2     | 57.141    | 70598493  | 351970 | 50.060  | 36.925   |
| Total |           | 141026972 | 953208 | 100.000 | 100.000  |

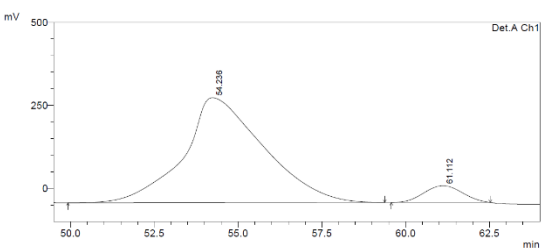

1 Det.A Ch1/218nm

PeakTable

| Peak# | Ret. Time | Area     | Height | Area %  | Height % |
|-------|-----------|----------|--------|---------|----------|
| 1     | 54.236    | 52629791 | 316182 | 92.898  | 86.239   |
| 2     | 61.112    | 4023512  | 50453  | 7.102   | 13.761   |
| Total |           | 56653304 | 366634 | 100.000 | 100.000  |

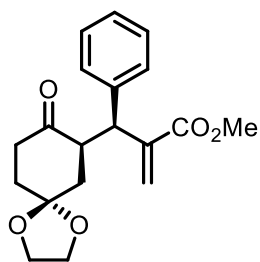

**3c**

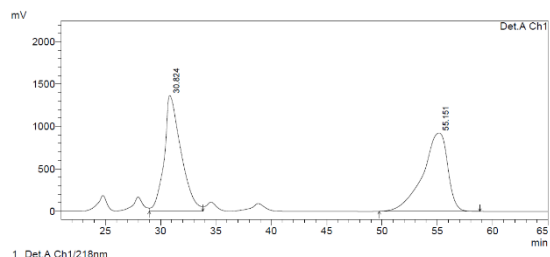

1 Det.A Ch1/218nm

PeakTable

| Peak# | Ret. Time | Area      | Height  | Area %  | Height % |
|-------|-----------|-----------|---------|---------|----------|
| 1     | 30.824    | 145068468 | 1367574 | 50.042  | 59.628   |
| 2     | 54.951    | 144823195 | 925927  | 49.958  | 40.372   |
| Total |           | 289891663 | 2293502 | 100.000 | 100.000  |

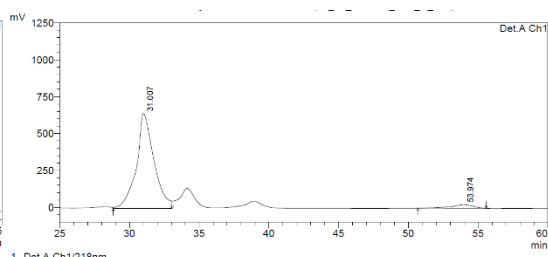

1 Det.A Ch1/218nm

PeakTable

| Peak# | Ret. Time | Area     | Height | Area %  | Height % |
|-------|-----------|----------|--------|---------|----------|
| 1     | 31.007    | 56488913 | 643978 | 95.317  | 96.406   |
| 2     | 53.874    | 2775122  | 24007  | 4.683   | 3.594    |
| Total |           | 59264035 | 667985 | 100.000 | 100.000  |

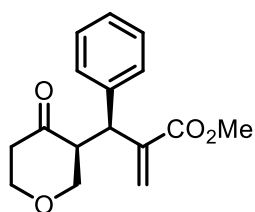

**3d**

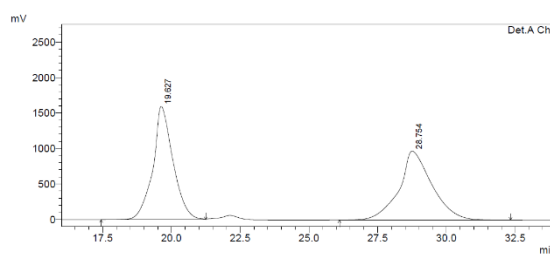

1 Det.A Ch1/218nm

PeakTable

| Peak# | Ret. Time | Area      | Height  | Area %  | Height % |
|-------|-----------|-----------|---------|---------|----------|
| 1     | 19.627    | 81725372  | 1597822 | 50.246  | 62.180   |
| 2     | 28.754    | 80926117  | 971843  | 49.754  | 37.820   |
| Total |           | 162651489 | 2569665 | 100.000 | 100.000  |

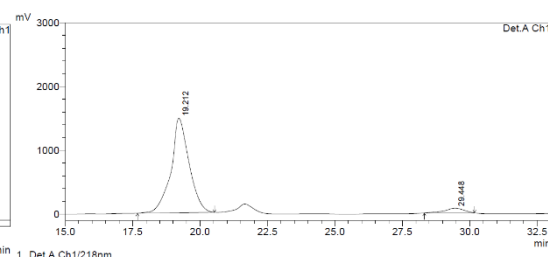

1 Det.A Ch1/218nm

PeakTable

| Peak# | Ret. Time | Area     | Height  | Area %  | Height % |
|-------|-----------|----------|---------|---------|----------|
| 1     | 19.212    | 69347139 | 1480247 | 94.983  | 95.174   |
| 2     | 29.448    | 3663102  | 75066   | 5.017   | 4.826    |
| Total |           | 73010241 | 1555313 | 100.000 | 100.000  |

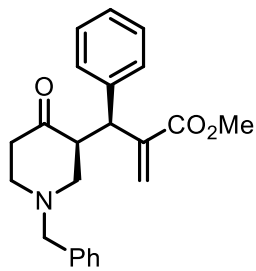

**3e**

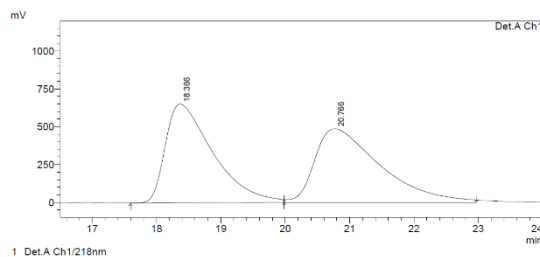

| PeakTable |           |          |         |         |          |
|-----------|-----------|----------|---------|---------|----------|
| Peak#     | Ret. Time | Area     | Height  | Area %  | Height % |
| 1         | 18.366    | 33499262 | 652701  | 49.492  | 57.301   |
| 2         | 20.766    | 34187486 | 486380  | 50.508  | 42.699   |
| Total     |           | 67686747 | 1139082 | 100.000 | 100.000  |

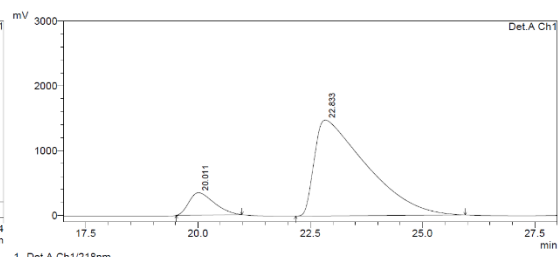

| PeakTable |           |           |         |         |          |
|-----------|-----------|-----------|---------|---------|----------|
| Peak#     | Ret. Time | Area      | Height  | Area %  | Height % |
| 1         | 20.011    | 13481377  | 345566  | 10.132  | 18.953   |
| 2         | 22.633    | 119574469 | 1477708 | 89.868  | 81.047   |
| Total     |           | 133055838 | 1823274 | 100.000 | 100.000  |

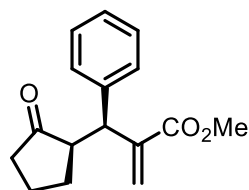

**3f**

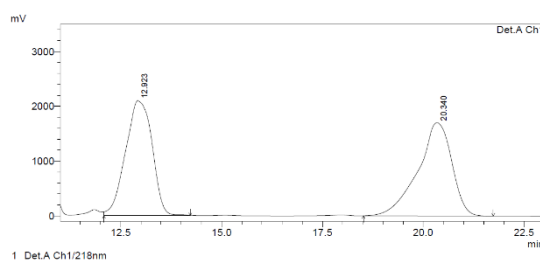

| PeakTable |           |           |         |         |          |
|-----------|-----------|-----------|---------|---------|----------|
| Peak#     | Ret. Time | Area      | Height  | Area %  | Height % |
| 1         | 12.923    | 96718322  | 2102978 | 49.399  | 55.289   |
| 2         | 20.340    | 99428258  | 1700643 | 50.601  | 44.711   |
| Total     |           | 196146580 | 3803619 | 100.000 | 100.000  |

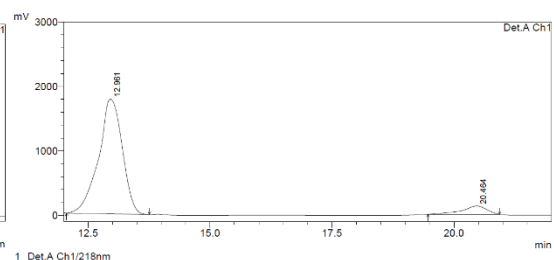

| PeakTable |           |          |         |         |          |
|-----------|-----------|----------|---------|---------|----------|
| Peak#     | Ret. Time | Area     | Height  | Area %  | Height % |
| 1         | 12.961    | 60334301 | 1779612 | 93.094  | 93.327   |
| 2         | 20.464    | 4476002  | 127247  | 6.906   | 6.673    |
| Total     |           | 64810303 | 1906859 | 100.000 | 100.000  |

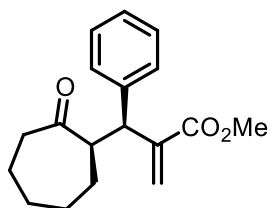

**3g**

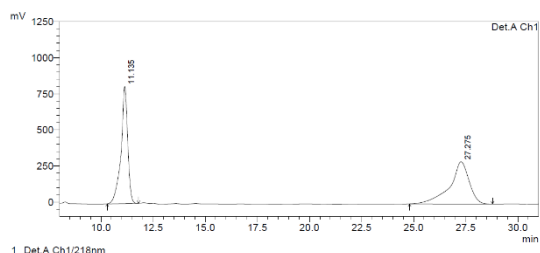

| Peak# | Ret. Time | Area     | Height  | Area %  | Height % |
|-------|-----------|----------|---------|---------|----------|
| 1     | 11.135    | 18200178 | 811139  | 49.121  | 73.481   |
| 2     | 27.275    | 18851527 | 292744  | 50.879  | 26.519   |
| Total |           | 37051704 | 1103883 | 100.000 | 100.000  |

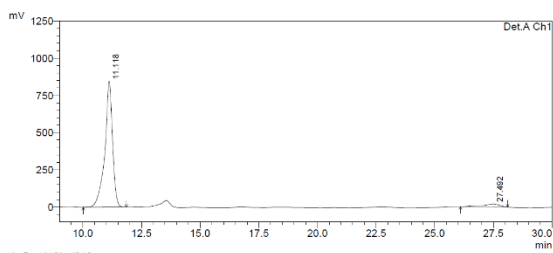

| Peak# | Ret. Time | Area     | Height | Area %  | Height % |
|-------|-----------|----------|--------|---------|----------|
| 1     | 11.118    | 19343836 | 844417 | 94.941  | 97.751   |
| 2     | 27.492    | 1030683  | 19426  | 5.059   | 2.249    |
| Total |           | 20374519 | 863843 | 100.000 | 100.000  |

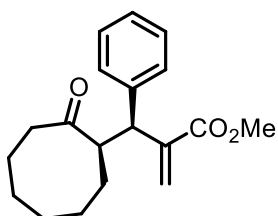

**3h**

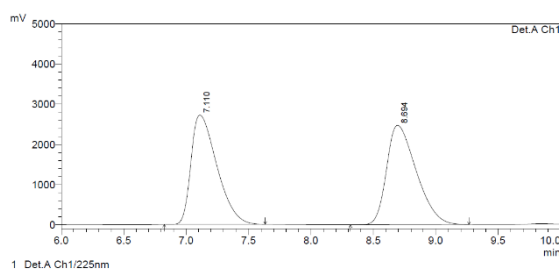

| Peak# | Ret. Time | Area     | Height  | Area %  | Height % |
|-------|-----------|----------|---------|---------|----------|
| 1     | 7.110     | 39156233 | 2717064 | 48.955  | 52.393   |
| 2     | 8.694     | 40828321 | 2468861 | 51.045  | 47.607   |
| Total |           | 79984555 | 5185925 | 100.000 | 100.000  |

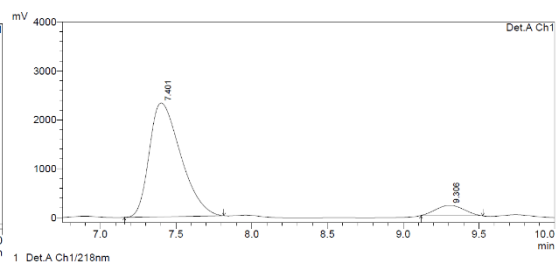

| Peak# | Ret. Time | Area     | Height  | Area %  | Height % |
|-------|-----------|----------|---------|---------|----------|
| 1     | 7.401     | 33617791 | 2320862 | 92.509  | 91.635   |
| 2     | 9.306     | 2722171  | 211831  | 7.491   | 8.365    |
| Total |           | 36339962 | 2532713 | 100.000 | 100.000  |

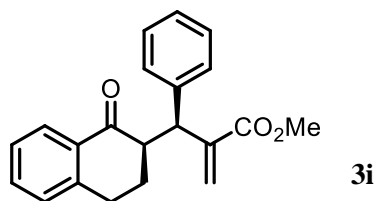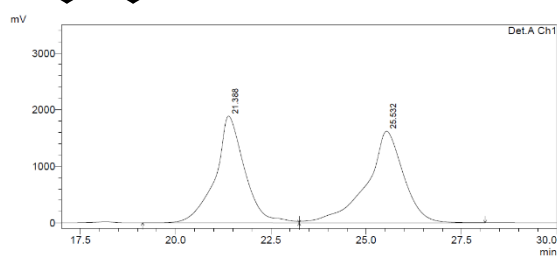

| PeakTable |           |           |         |         |          |
|-----------|-----------|-----------|---------|---------|----------|
| Peak#     | Ret. Time | Area      | Height  | Area %  | Height % |
| 1         | 21.388    | 101242940 | 1887961 | 48.026  | 53.808   |
| 2         | 25.532    | 109566001 | 1620752 | 51.974  | 46.192   |
| Total     |           | 210808941 | 3508713 | 100.000 | 100.000  |

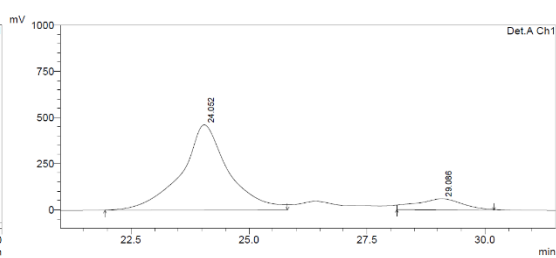

| PeakTable |           |          |        |         |          |
|-----------|-----------|----------|--------|---------|----------|
| Peak#     | Ret. Time | Area     | Height | Area %  | Height % |
| 1         | 24.052    | 32135473 | 461625 | 88.602  | 88.533   |
| 2         | 29.086    | 4134111  | 59789  | 11.398  | 11.467   |
| Total     |           | 36269583 | 521414 | 100.000 | 100.000  |

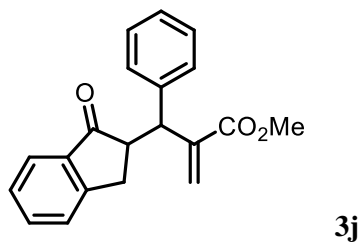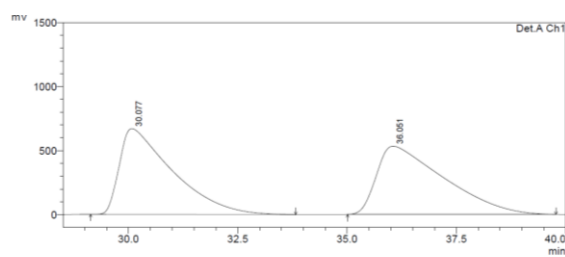

| PeakTable |           |           |         |         |          |
|-----------|-----------|-----------|---------|---------|----------|
| Peak#     | Ret. Time | Area      | Height  | Area %  | Height % |
| 1         | 30.077    | 56532152  | 669852  | 49.774  | 55.657   |
| 2         | 36.051    | 57046102  | 533673  | 50.226  | 44.343   |
| Total     |           | 113578314 | 1203525 | 100.000 | 100.000  |

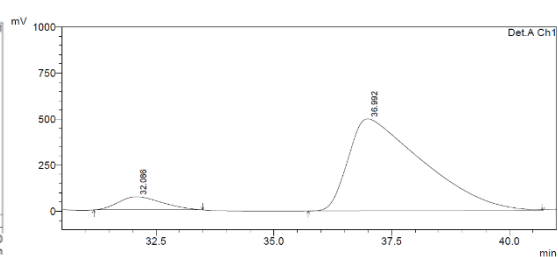

| PeakTable |           |          |        |         |          |
|-----------|-----------|----------|--------|---------|----------|
| Peak#     | Ret. Time | Area     | Height | Area %  | Height % |
| 1         | 32.086    | 4605768  | 71249  | 7.735   | 12.513   |
| 2         | 36.992    | 54941793 | 498134 | 92.265  | 87.487   |
| Total     |           | 59547561 | 569383 | 100.000 | 100.000  |

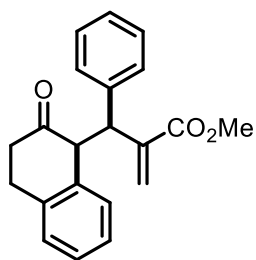

**3k** (mixture of diastereomers)

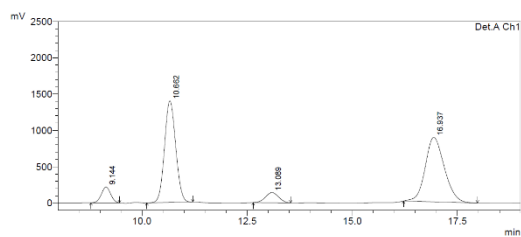

1 Det.A Ch1/218nm

PeakTable

| Peak# | Ret. Time | Area     | Height  | Area %  | Height % |
|-------|-----------|----------|---------|---------|----------|
| 1     | 8.444     | 3335926  | 217509  | 5.533   | 8.229    |
| 2     | 10.662    | 25848428 | 1597976 | 42.869  | 52.887   |
| 3     | 13.089    | 3057250  | 140194  | 5.070   | 5.304    |
| 4     | 16.937    | 20055197 | 887624  | 46.528  | 33.560   |
| Total |           | 60296800 | 2643304 | 100.000 | 100.000  |

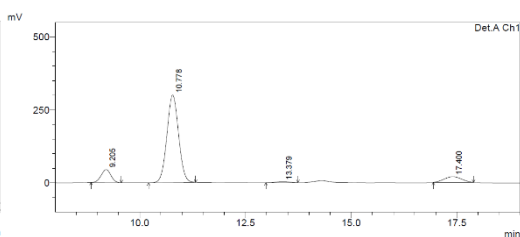

1 Det.A Ch1/218nm

PeakTable

| Peak# | Ret. Time | Area    | Height | Area %  | Height % |
|-------|-----------|---------|--------|---------|----------|
| 1     | 9.205     | 710255  | 44477  | 10.051  | 12.121   |
| 2     | 10.778    | 5738352 | 300008 | 81.207  | 81.758   |
| 3     | 13.379    | 58115   | 2712   | 0.827   | 0.739    |
| 4     | 17.400    | 459139  | 19751  | 7.916   | 5.383    |
| Total |           | 7066361 | 366948 | 100.000 | 100.000  |

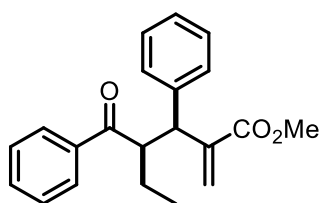

**3l** (mixture of diastereomers)

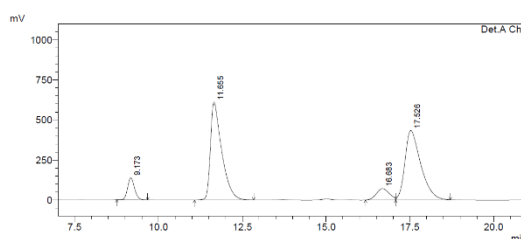

1 Det.A Ch1/218nm

PeakTable

| Peak# | Ret. Time | Area     | Height  | Area %  | Height % |
|-------|-----------|----------|---------|---------|----------|
| 1     | 9.173     | 1965933  | 137513  | 6.047   | 10.958   |
| 2     | 11.655    | 14558823 | 611872  | 44.169  | 48.760   |
| 3     | 16.653    | 1902558  | 71298   | 5.551   | 5.682    |
| 4     | 17.526    | 14281046 | 434174  | 43.930  | 34.599   |
| Total |           | 32508659 | 1254837 | 100.000 | 100.000  |

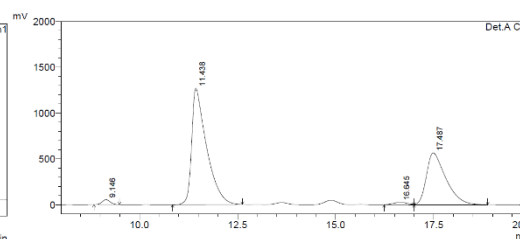

1 Det.A Ch1/218nm

PeakTable

| Peak# | Ret. Time | Area     | Height  | Area %  | Height % |
|-------|-----------|----------|---------|---------|----------|
| 1     | 9.146     | 778545   | 53774   | 1.430   | 2.806    |
| 2     | 11.438    | 33472435 | 1270334 | 61.300  | 66.296   |
| 3     | 16.645    | 77916    | 2671    | 1.319   | 1.397    |
| 4     | 17.487    | 19457882 | 565441  | 35.751  | 29.507   |
| Total |           | 54426779 | 1916320 | 100.000 | 100.000  |

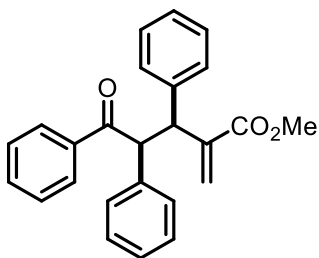

**3m** (mixture of diastereomers)

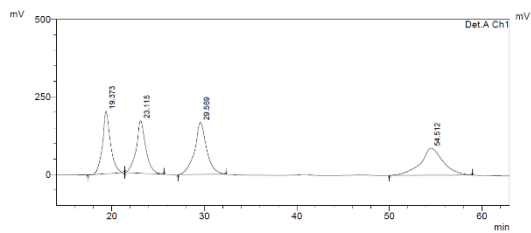

1 Det.A Ch1/218nm

| PeakTable |           |          |        |         |          |
|-----------|-----------|----------|--------|---------|----------|
| Peak#     | Ret. Time | Area     | Height | Area %  | Height % |
| 1         | 19.373    | 12167328 | 201663 | 28.563  | 32.180   |
| 2         | 23.115    | 15216090 | 169963 | 32.454  | 27.122   |
| 3         | 29.569    | 15294267 | 167994 | 27.944  | 26.807   |
| 4         | 54.512    | 1820581  | 87053  | 2.729   | 13.891   |
| Total     |           | 54409080 | 626673 | 100.000 | 100.000  |

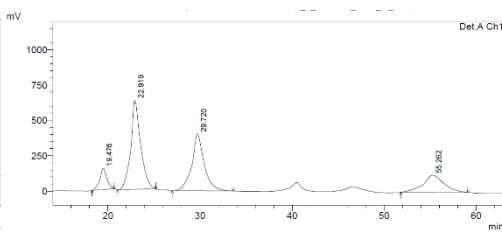

1 Det.A Ch1/218nm

| PeakTable |           |           |         |         |          |
|-----------|-----------|-----------|---------|---------|----------|
| Peak#     | Ret. Time | Area      | Height  | Area %  | Height % |
| 1         | 19.476    | 6138966   | 150785  | 7.219   | 11.549   |
| 2         | 22.819    | 47392887  | 632110  | 42.038  | 48.414   |
| 3         | 29.720    | 37950619  | 402533  | 33.662  | 30.831   |
| 4         | 56.262    | 19256999  | 120198  | 17.081  | 9.206    |
| Total     |           | 112739471 | 1305626 | 100.000 | 100.000  |

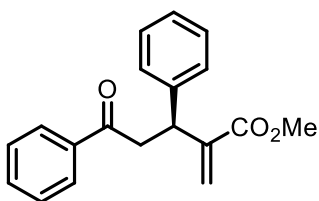

**3n**

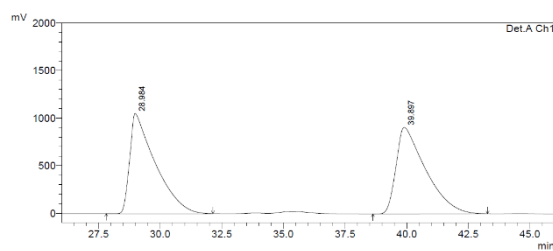

1 Det.A Ch1/218nm

| PeakTable |           |           |         |         |          |
|-----------|-----------|-----------|---------|---------|----------|
| Peak#     | Ret. Time | Area      | Height  | Area %  | Height % |
| 1         | 28.984    | 75559391  | 1052357 | 49.850  | 53.639   |
| 2         | 39.897    | 75811525  | 909535  | 50.150  | 46.361   |
| Total     |           | 151170916 | 1961872 | 100.000 | 100.000  |

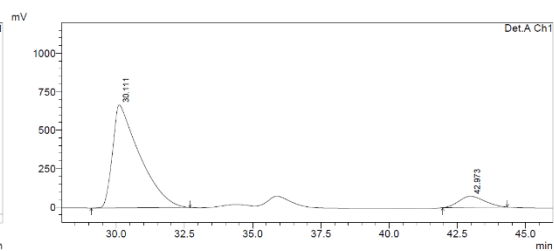

1 Det.A Ch1/218nm

| PeakTable |           |          |        |         |          |
|-----------|-----------|----------|--------|---------|----------|
| Peak#     | Ret. Time | Area     | Height | Area %  | Height % |
| 1         | 30.111    | 46292986 | 669562 | 90.580  | 90.194   |
| 2         | 42.873    | 4814573  | 72794  | 9.420   | 9.806    |
| Total     |           | 51107559 | 742356 | 100.000 | 100.000  |

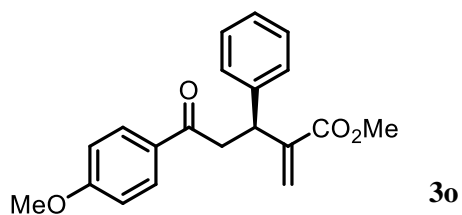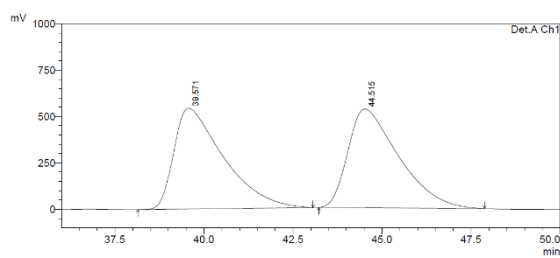

1 Det.A Ch1/218nm

| PeakTable |           |           |         |         |          |
|-----------|-----------|-----------|---------|---------|----------|
| Peak#     | Ret. Time | Area      | Height  | Area %  | Height % |
| 1         | 39.571    | 52561380  | 542140  | 49.942  | 50.478   |
| 2         | 44.515    | 52685873  | 531880  | 50.058  | 49.522   |
| Total     |           | 105250253 | 1074019 | 100.000 | 100.000  |

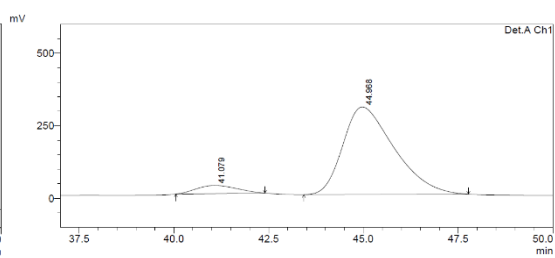

1 Det.A Ch1/218nm

| PeakTable |           |          |        |         |          |
|-----------|-----------|----------|--------|---------|----------|
| Peak#     | Ret. Time | Area     | Height | Area %  | Height % |
| 1         | 41.079    | 2093667  | 28334  | 6.861   | 8.588    |
| 2         | 44.988    | 28420125 | 301587 | 93.139  | 91.412   |
| Total     |           | 30513793 | 329921 | 100.000 | 100.000  |

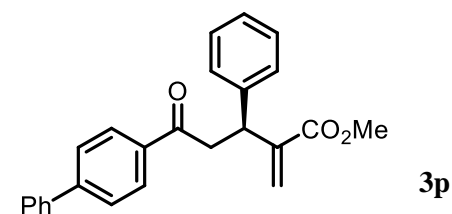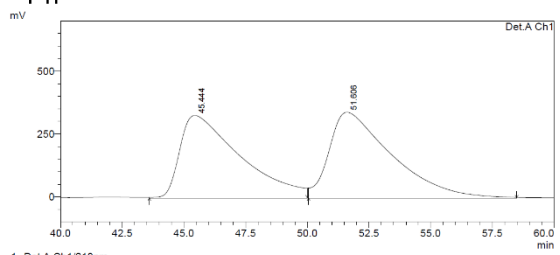

1 Det.A Ch1/218nm

| PeakTable |           |           |        |         |          |
|-----------|-----------|-----------|--------|---------|----------|
| Peak#     | Ret. Time | Area      | Height | Area %  | Height % |
| 1         | 46.444    | 55722322  | 228662 | 48.102  | 49.037   |
| 2         | 51.808    | 60120075  | 341566 | 51.898  | 50.963   |
| Total     |           | 115843307 | 670228 | 100.000 | 100.000  |

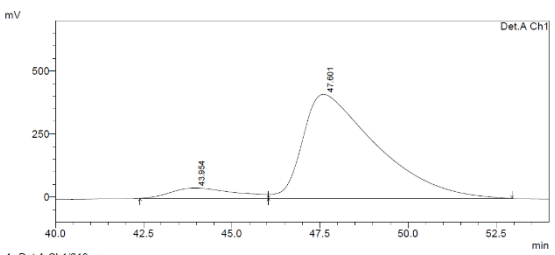

1 Det.A Ch1/218nm

| PeakTable |           |          |        |         |          |
|-----------|-----------|----------|--------|---------|----------|
| Peak#     | Ret. Time | Area     | Height | Area %  | Height % |
| 1         | 43.394    | 5094760  | 40313  | 7.244   | 8.908    |
| 2         | 47.801    | 50852441 | 412211 | 92.756  | 91.092   |
| Total     |           | 64947201 | 452524 | 100.000 | 100.000  |

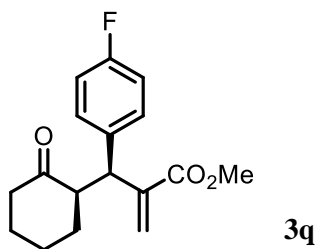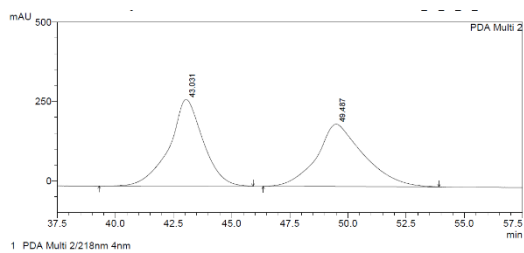

| PeakTable |           |          |        |         |          |
|-----------|-----------|----------|--------|---------|----------|
| Peak#     | Ret. Time | Area     | Height | Area %  | Height % |
| 1         | 43.031    | 27172250 | 272662 | 50.072  | 58.132   |
| 2         | 49.487    | 27403256 | 196379 | 49.925  | 41.868   |
| Total     |           | 55065487 | 469040 | 100.000 | 100.000  |

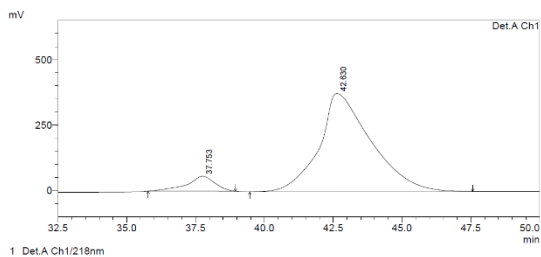

| PeakTable |           |          |        |         |          |
|-----------|-----------|----------|--------|---------|----------|
| Peak#     | Ret. Time | Area     | Height | Area %  | Height % |
| 1         | 37.753    | 6009312  | 56784  | 7.497   | 13.143   |
| 2         | 42.830    | 69471025 | 375276 | 92.503  | 86.857   |
| Total     |           | 53480337 | 432060 | 100.000 | 100.000  |

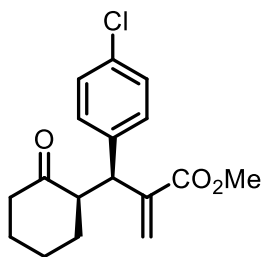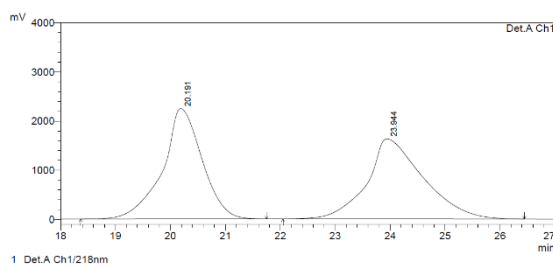

| PeakTable |           |           |         |         |          |
|-----------|-----------|-----------|---------|---------|----------|
| Peak#     | Ret. Time | Area      | Height  | Area %  | Height % |
| 1         | 20.191    | 112472070 | 2345072 | 49.296  | 57.953   |
| 2         | 23.944    | 115682472 | 1627441 | 50.704  | 42.047   |
| Total     |           | 228154543 | 3870513 | 100.000 | 100.000  |

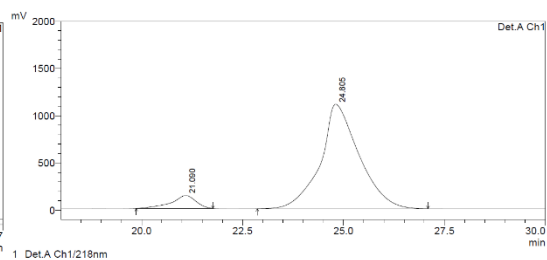

| PeakTable |           |          |         |         |          |
|-----------|-----------|----------|---------|---------|----------|
| Peak#     | Ret. Time | Area     | Height  | Area %  | Height % |
| 1         | 21.090    | 5764799  | 136755  | 7.250   | 11.001   |
| 2         | 24.805    | 75752765 | 1106310 | 92.750  | 88.999   |
| Total     |           | 79517564 | 1243066 | 100.000 | 100.000  |

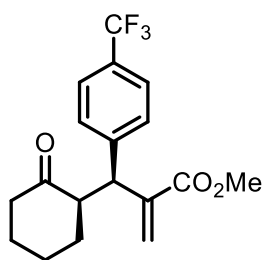

**3s**

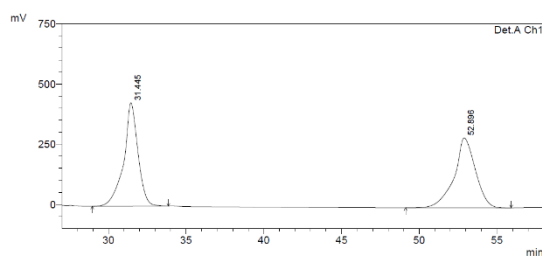

1 Det.A Ch1/218nm

PeakTable

| Peak# | Ret. Time | Area     | Height | Area %  | Height % |
|-------|-----------|----------|--------|---------|----------|
| 1     | 31.445    | 27446106 | 429721 | 49.952  | 59.680   |
| 2     | 52.896    | 27498853 | 290324 | 50.048  | 40.320   |
| Total |           | 54944959 | 720045 | 100.000 | 100.000  |

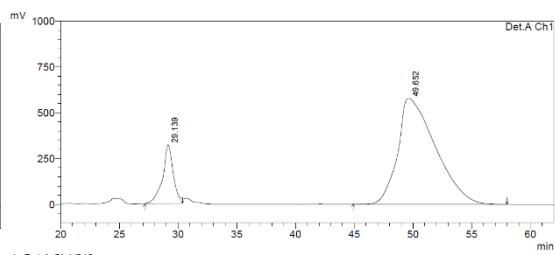

1 Det.A Ch1/218nm

PeakTable

| Peak# | Ret. Time | Area      | Height | Area %  | Height % |
|-------|-----------|-----------|--------|---------|----------|
| 1     | 29.139    | 20300927  | 319941 | 13.571  | 35.685   |
| 2     | 49.692    | 129292371 | 576641 | 86.429  | 64.315   |
| Total |           | 149593297 | 896582 | 100.000 | 100.000  |

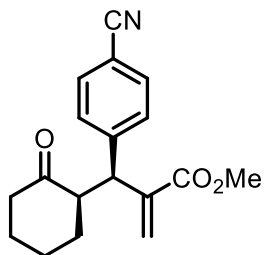

**3t**

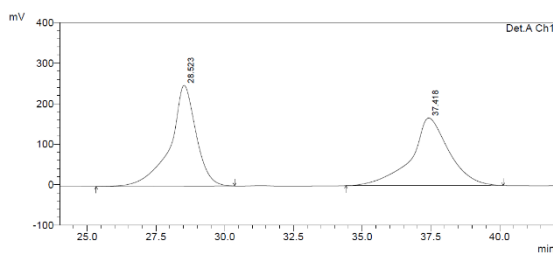

1 Det.A Ch1/218nm

PeakTable

| Peak# | Ret. Time | Area     | Height | Area %  | Height % |
|-------|-----------|----------|--------|---------|----------|
| 1     | 28.523    | 16302636 | 248574 | 50.697  | 59.899   |
| 2     | 37.418    | 15854185 | 166416 | 49.303  | 40.101   |
| Total |           | 32156821 | 414991 | 100.000 | 100.000  |

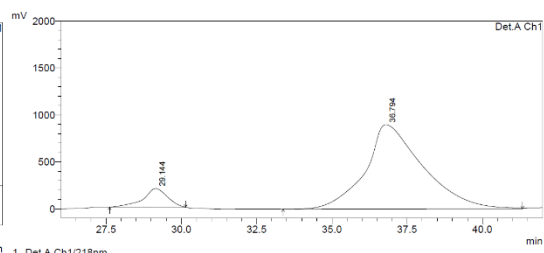

1 Det.A Ch1/218nm

PeakTable

| Peak# | Ret. Time | Area      | Height  | Area %  | Height % |
|-------|-----------|-----------|---------|---------|----------|
| 1     | 29.144    | 11169938  | 199215  | 8.529   | 18.159   |
| 2     | 36.794    | 119789053 | 897838  | 91.471  | 81.841   |
| Total |           | 130958992 | 1097052 | 100.000 | 100.000  |

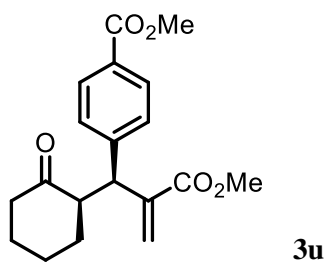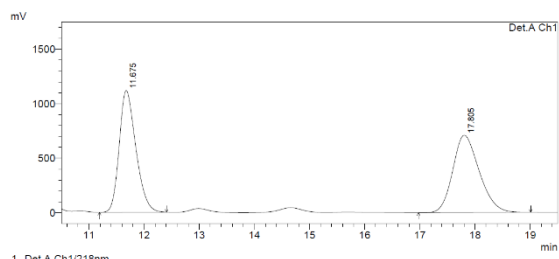

| PeakTable |           |          |         |         |          |
|-----------|-----------|----------|---------|---------|----------|
| Peak#     | Ret. Time | Area     | Height  | Area %  | Height % |
| 1         | 11.635    | 23440144 | 1115316 | 49.839  | 61.149   |
| 2         | 17.805    | 23591649 | 708610  | 50.161  | 38.851   |
| Total     |           | 47031793 | 1823926 | 100.000 | 100.000  |

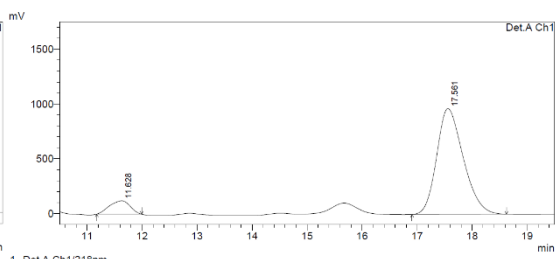

| PeakTable |           |          |         |         |          |
|-----------|-----------|----------|---------|---------|----------|
| Peak#     | Ret. Time | Area     | Height  | Area %  | Height % |
| 1         | 11.628    | 3164934  | 122377  | 8.887   | 11.255   |
| 2         | 17.861    | 32437148 | 954892  | 91.113  | 88.745   |
| Total     |           | 35601081 | 1087269 | 100.000 | 100.000  |

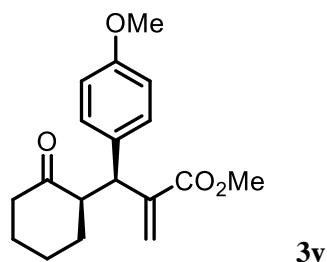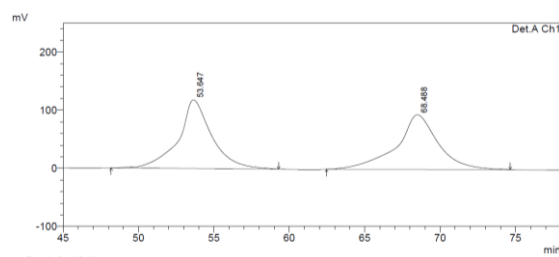

| PeakTable |           |          |        |         |          |
|-----------|-----------|----------|--------|---------|----------|
| Peak#     | Ret. Time | Area     | Height | Area %  | Height % |
| 1         | 53.647    | 18230845 | 118075 | 50.224  | 55.676   |
| 2         | 68.488    | 18076798 | 94001  | 49.776  | 44.324   |
| Total     |           | 36316643 | 212077 | 100.000 | 100.000  |

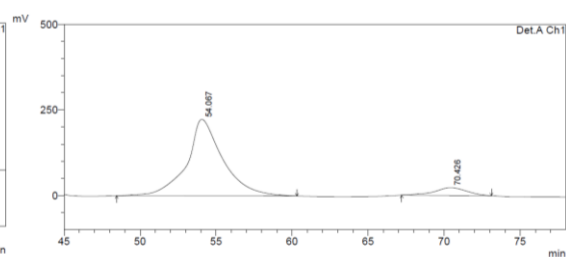

| PeakTable |           |          |        |         |          |
|-----------|-----------|----------|--------|---------|----------|
| Peak#     | Ret. Time | Area     | Height | Area %  | Height % |
| 1         | 54.067    | 37064942 | 223495 | 91.667  | 90.701   |
| 2         | 70.426    | 3369441  | 22913  | 8.333   | 9.299    |
| Total     |           | 40434383 | 246408 | 100.000 | 100.000  |

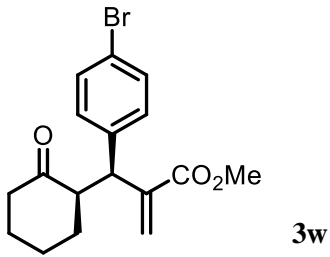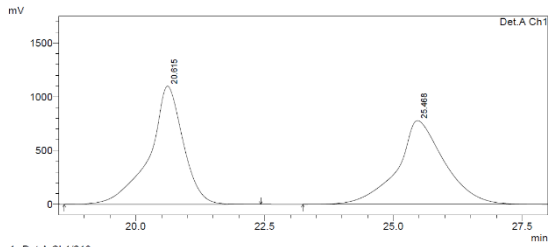

| PeakTable |           |          |         |         |          |  |
|-----------|-----------|----------|---------|---------|----------|--|
| Peak#     | Ret. Time | Area     | Height  | Area %  | Height % |  |
| 1         | 20.615    | 50352259 | 1099337 | 50.358  | 58.504   |  |
| 2         | 25.468    | 49530472 | 770737  | 49.642  | 41.496   |  |
| Total     |           | 99792730 | 1879073 | 100.000 | 100.000  |  |

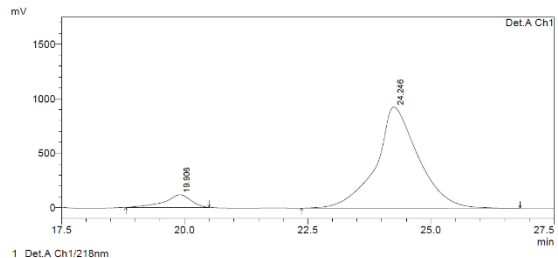

| PeakTable |           |          |         |         |          |  |
|-----------|-----------|----------|---------|---------|----------|--|
| Peak#     | Ret. Time | Area     | Height  | Area %  | Height % |  |
| 1         | 19.906    | 4343417  | 115769  | 7.285   | 11.051   |  |
| 2         | 24.246    | 55281293 | 928008  | 92.715  | 88.949   |  |
| Total     |           | 59624711 | 1043777 | 100.000 | 100.000  |  |

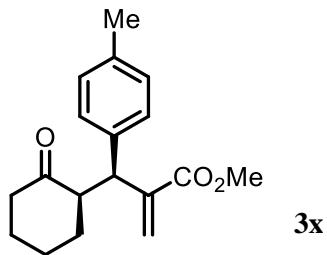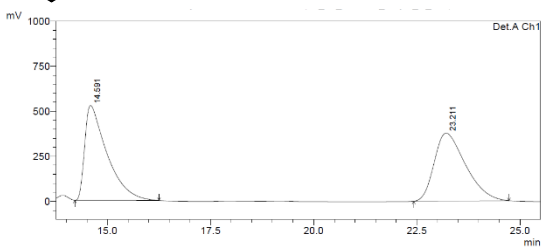

| PeakTable |           |          |        |         |          |  |
|-----------|-----------|----------|--------|---------|----------|--|
| Peak#     | Ret. Time | Area     | Height | Area %  | Height % |  |
| 1         | 14.591    | 19756005 | 525937 | 49.831  | 58.274   |  |
| 2         | 23.211    | 19889866 | 376586 | 50.169  | 41.726   |  |
| Total     |           | 39645871 | 902522 | 100.000 | 100.000  |  |

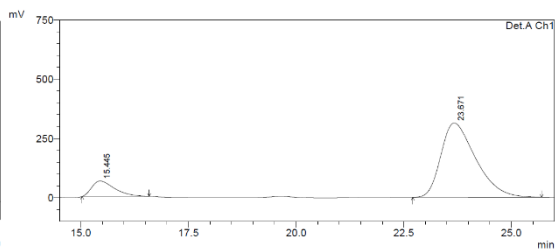

| PeakTable |           |          |        |         |          |  |
|-----------|-----------|----------|--------|---------|----------|--|
| Peak#     | Ret. Time | Area     | Height | Area %  | Height % |  |
| 1         | 15.445    | 2411255  | 65531  | 12.065  | 17.306   |  |
| 2         | 23.671    | 17574134 | 312120 | 87.935  | 82.694   |  |
| Total     |           | 19985389 | 378651 | 100.000 | 100.000  |  |

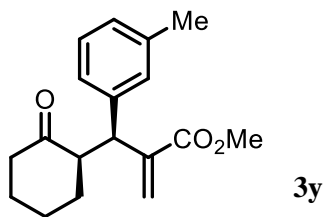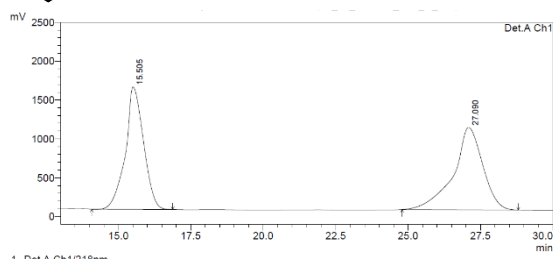

| PeakTable |           |           |         |         |          |  |
|-----------|-----------|-----------|---------|---------|----------|--|
| Peak#     | Ret. Time | Area      | Height  | Area %  | Height % |  |
| 1         | 15.505    | 68982049  | 1574998 | 47.975  | 59.782   |  |
| 2         | 27.090    | 74804447  | 1059593 | 52.025  | 40.218   |  |
| Total     |           | 143786496 | 2634591 | 100.000 | 100.000  |  |

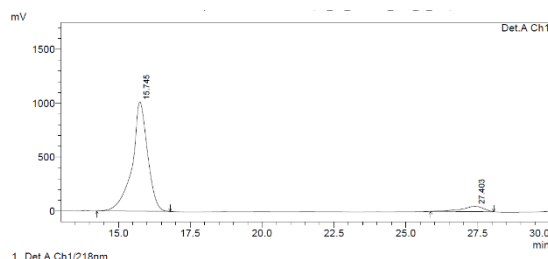

| PeakTable |           |          |         |         |          |  |
|-----------|-----------|----------|---------|---------|----------|--|
| Peak#     | Ret. Time | Area     | Height  | Area %  | Height % |  |
| 1         | 15.745    | 37902151 | 1013906 | 93.641  | 95.363   |  |
| 2         | 27.403    | 2574008  | 49306   | 6.359   | 4.637    |  |
| Total     |           | 40476159 | 1063212 | 100.000 | 100.000  |  |

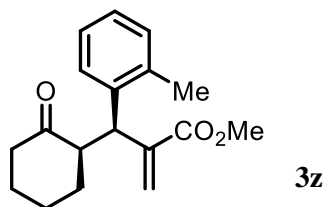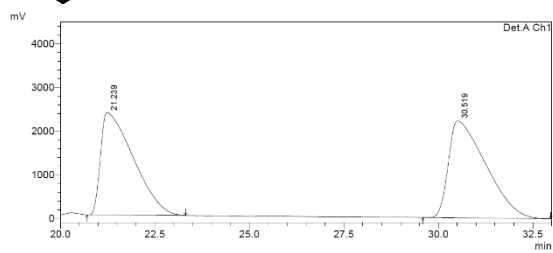

| PeakTable |           |           |         |         |          |  |
|-----------|-----------|-----------|---------|---------|----------|--|
| Peak#     | Ret. Time | Area      | Height  | Area %  | Height % |  |
| 1         | 21.229    | 141334076 | 2345222 | 48.122  | 51.352   |  |
| 2         | 30.519    | 152467398 | 2221702 | 51.878  | 48.648   |  |
| Total     |           | 293702474 | 4566925 | 100.000 | 100.000  |  |

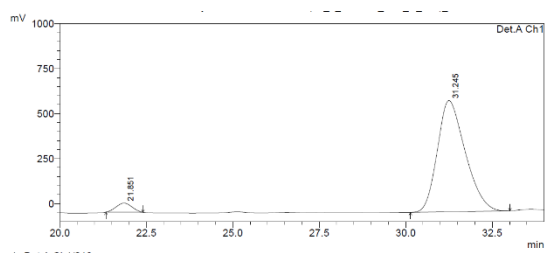

| PeakTable |           |          |        |         |          |  |
|-----------|-----------|----------|--------|---------|----------|--|
| Peak#     | Ret. Time | Area     | Height | Area %  | Height % |  |
| 1         | 21.851    | 1387047  | 49973  | 4.383   | 7.388    |  |
| 2         | 31.245    | 34625911 | 617419 | 95.617  | 92.612   |  |
| Total     |           | 36212957 | 667393 | 100.000 | 100.000  |  |

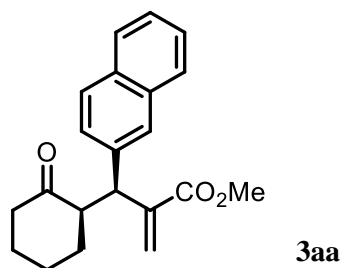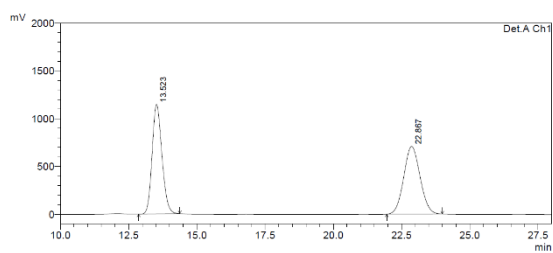

| Peak# | Ret. Time | Area     | Height  | Area %  | Height % |
|-------|-----------|----------|---------|---------|----------|
| 1     | 13.523    | 28577198 | 1115328 | 49.337  | 61.803   |
| 2     | 22.867    | 29447768 | 707908  | 50.663  | 38.198   |
| Total |           | 58124967 | 1852236 | 100.000 | 100.000  |

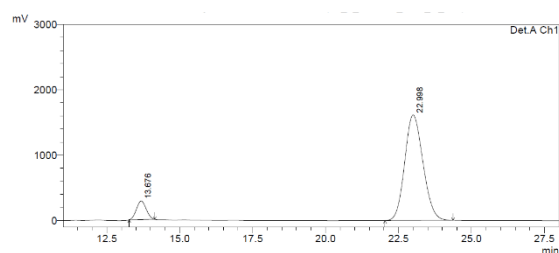

| Peak# | Ret. Time | Area     | Height  | Area %  | Height % |
|-------|-----------|----------|---------|---------|----------|
| 1     | 13.676    | 6616131  | 284113  | 8.500   | 14.988   |
| 2     | 22.998    | 70322945 | 1611483 | 91.501  | 85.012   |
| Total |           | 76939076 | 1895598 | 100.000 | 100.000  |

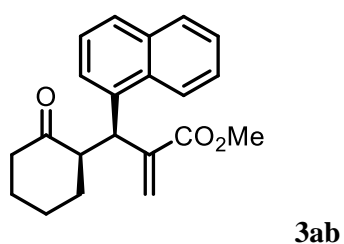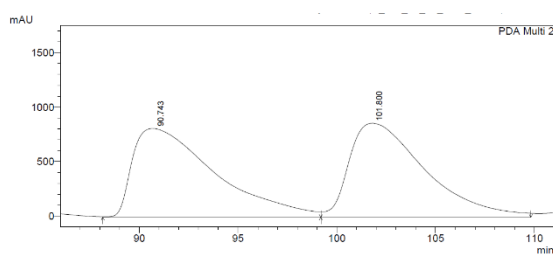

| Peak# | Ret. Time | Area      | Height  | Area %  | Height % |
|-------|-----------|-----------|---------|---------|----------|
| 1     | 90.743    | 236665687 | 815649  | 50.644  | 48.538   |
| 2     | 101.800   | 230649323 | 864785  | 49.356  | 51.462   |
| Total |           | 467315010 | 1680434 | 100.000 | 100.000  |

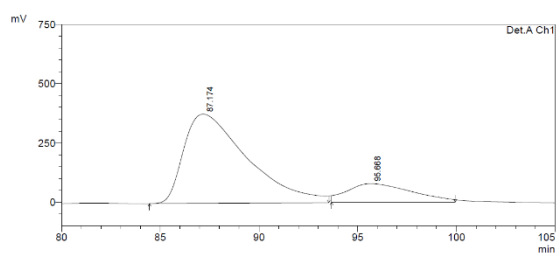

| Peak# | Ret. Time | Area      | Height | Area %  | Height % |
|-------|-----------|-----------|--------|---------|----------|
| 1     | 87.174    | 84286130  | 376061 | 82.584  | 82.809   |
| 2     | 98.968    | 17773494  | 78069  | 17.415  | 17.191   |
| Total |           | 102059624 | 454130 | 100.000 | 100.000  |

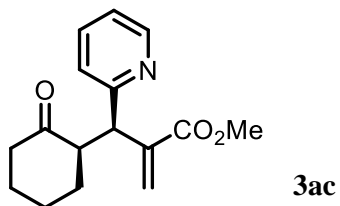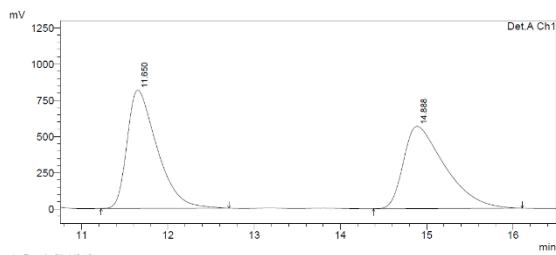

1 Det.A Ch1/218nm

| Peak# | Ret. Time | Area     | Height  | Area %  | Height % |
|-------|-----------|----------|---------|---------|----------|
| 1     | 11.650    | 19698740 | 814968  | 50.934  | 58.957   |
| 2     | 14.888    | 18976614 | 567350  | 49.066  | 41.043   |
| Total |           | 38675354 | 1382318 | 100.000 | 100.000  |

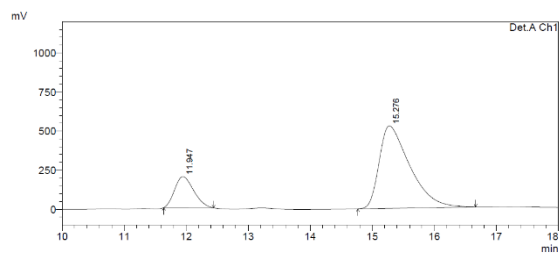

1 Det.A Ch1/218nm

| Peak# | Ret. Time | Area     | Height | Area %  | Height % |
|-------|-----------|----------|--------|---------|----------|
| 1     | 11.947    | 4243404  | 168803 | 18.998  | 27.393   |
| 2     | 15.276    | 18093546 | 526880 | 81.002  | 72.605   |
| Total |           | 22337040 | 725683 | 100.000 | 100.000  |

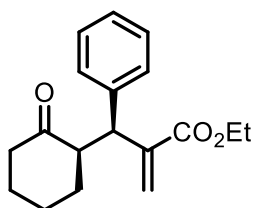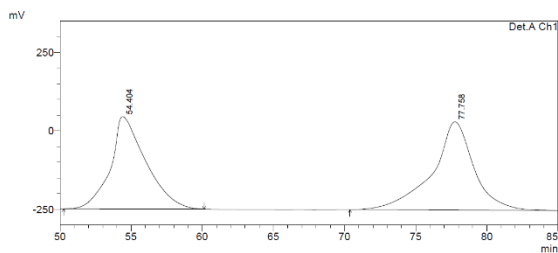

1 Det.A Ch1/218nm

| Peak# | Ret. Time | Area      | Height | Area %  | Height % |
|-------|-----------|-----------|--------|---------|----------|
| 1     | 54.404    | 50973950  | 294017 | 47.295  | 51.131   |
| 2     | 77.758    | 46804249  | 281012 | 52.705  | 48.869   |
| Total |           | 107778209 | 575030 | 100.000 | 100.000  |

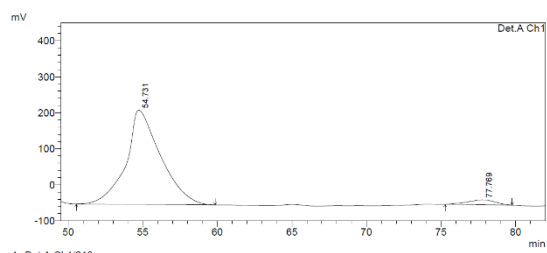

1 Det.A Ch1/218nm

| Peak# | Ret. Time | Area     | Height | Area %  | Height % |
|-------|-----------|----------|--------|---------|----------|
| 1     | 54.731    | 42331880 | 261121 | 95.927  | 94.956   |
| 2     | 77.769    | 1797254  | 13881  | 4.073   | 5.044    |
| Total |           | 44129134 | 275201 | 100.000 | 100.000  |

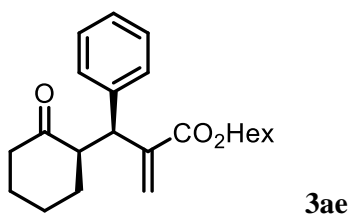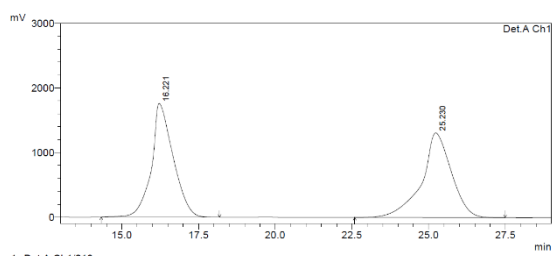

| PeakTable |           |           |         |         |          |
|-----------|-----------|-----------|---------|---------|----------|
| Peak#     | Ret. Time | Area      | Height  | Area %  | Height % |
| 1         | 16.221    | 86661976  | 1758054 | 49.578  | 57.324   |
| 2         | 25.230    | 88138171  | 1308827 | 50.422  | 42.676   |
| Total     |           | 174800147 | 3066881 | 100.000 | 100.000  |

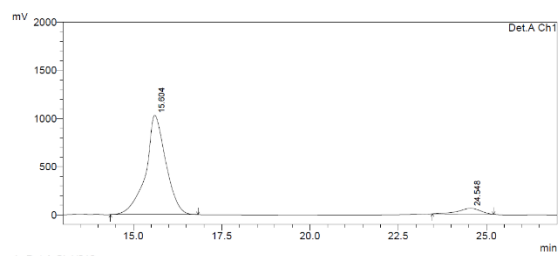

| PeakTable |           |          |         |         |          |
|-----------|-----------|----------|---------|---------|----------|
| Peak#     | Ret. Time | Area     | Height  | Area %  | Height % |
| 1         | 15.604    | 46935034 | 1030979 | 94.003  | 94.498   |
| 2         | 24.548    | 2611475  | 60029   | 5.997   | 5.502    |
| Total     |           | 45546508 | 1091008 | 100.000 | 100.000  |

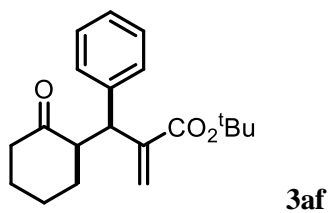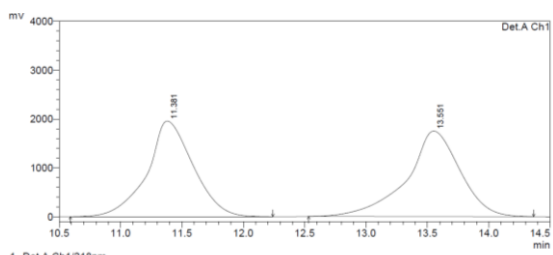

| PeakTable |           |           |         |         |          |
|-----------|-----------|-----------|---------|---------|----------|
| Peak#     | Ret. Time | Area      | Height  | Area %  | Height % |
| 1         | 11.381    | 51072332  | 1952554 | 49.224  | 52.787   |
| 2         | 13.551    | 52682078  | 1746368 | 50.776  | 47.213   |
| Total     |           | 103754410 | 3698942 | 100.000 | 100.000  |
